# Supplementary material for: Enantioselective construction of functionalized oxazoles via anionic stereogenic-at-cobalt(iii) complex-catalyzed Ugi-4CR/Wittig reaction sequences
Source: Royal Society of Chemistry journal article supplement (doi:10.1039/d5ob00293a), 2025-01-01
Supplement: d5ob00293a1.pdf [file d5ob00293a1.pdf]

## ***Supporting Information for***

### **Enantioselective construction of functionalized oxazoles via anionic stereogenic-at-cobalt(III) complex-catalyzed Ugi-4CR/Wittig reaction sequences**

Qi-Ming Wang, Chang-Min Peng, Yong-En Sun, Chuan-Zhi Yao, Hua-Jie Jiang\* and Jie Yu\*

*Department of Applied Chemistry, Anhui Province Engineering Laboratory for Green Pesticide Development and Application, and Anhui Province Key Laboratory of Crop Integrated Pest Management, Anhui Agricultural University, Hefei 230036, China*

E-mail: jieyu@ahau.edu.cn, jianghj@ahau.edu.cn

### **Table of Contents**

|                                                                                             |      |
|---------------------------------------------------------------------------------------------|------|
| 1. Introduction.....                                                                        | S-2  |
| 1.1. General Data.....                                                                      | S-2  |
| 1.2. Materials.....                                                                         | S-2  |
| 1.3. Reaction conditions optimization.....                                                  | S-3  |
| 2. Experimental Procedures of Asymmetric Ugi/Wittig Reaction and Characterization Data..... | S-4  |
| 3. Asymmetric Ugi-4CR/Wittig reaction sequences in large-scale .....                        | S-24 |
| 4. Nonlinear Effect Studies .....                                                           | S-25 |
| 5. X-ray single crystal data for <b>6u</b> .....                                            | S-27 |
| 6. NMR spectra and HPLC traces .....                                                        | S-29 |

# 1. Introduction

## 1.1. General Data

<sup>1</sup>H-NMR, <sup>13</sup>C-NMR and <sup>19</sup>F-NMR spectrums were recorded on an Agilent 600 NMR spectrometer at 600 MHz, 151 MHz and 564 MHz using CDCl<sub>3</sub> as solvent, respectively. <sup>1</sup>H-NMR data are reported as follows: δ, chemical shift; coupling constants (*J* are given in Hertz, Hz) and integration. Abbreviations to denote the multiplicity of a particular signal were s (singlet), d (doublet), t (triplet), q (quartet) and m (multiplet). Chemical shifts were reported in ppm from the tetramethylsilane with the solvent resonance as internal standard. Melting points were measured on a digital melting point apparatus and the temperature was uncorrected. High resolution mass spectrometric measurements (HRMS) were performed by the Waters Xevo G2-XS TOF (ESI Source). HPLC analysis was performed on Waters-Breeze (2487 Dual λ Absorbance Detector and 1525 Binary HPLC Pump, UV detection monitored at 254 nm). Chiralpak IB and IF columns were purchased from Daicel Chemical Industries, Ltd. Single crystal structures of the compounds were determined by measuring X-ray intensity data on a 'Bruker APEX-II CCD' diffractometer. The crystal was kept at low and room temperature (172-298 K) during data collection. Using Olex2, the structure was solved with the ShelXT structure solution program using Intrinsic Phasing and refined with the ShelXL refinement package using Least Squares minimization. The non-hydrogen atoms were refined anisotropically and all the hydrogen atoms were assigned in idealized locations. Optical rotations were recorded on an Anton Paar MCP-100 polarimeter.

## 1.2. Materials

Analytic grade solvents for the column chromatography and commercially available reagents were used as received. Toluene were dried over Na and distilled prior to use. The catalysts (Λ-**1a** to Λ-**1g**)<sup>[1]</sup> and substrates **5**<sup>[2]</sup> were known compounds, and the spectral data were in accordance with the literature.

---

[1] (a) J. Yu, H.-J. Jiang, Y. Zhou, S.-W. Luo and L.-Z. Gong, *Angew. Chem., Int. Ed.*, 2015, **54**, 11209; (b) H.-J. Jiang, K. Liu, J. Yu, L. Zhang and L.-Z. Gong, *Angew. Chem., Int. Ed.*, 2017, **56**, 11931; (c) B.-B. Sun, K. Liu, Q. Gao, W. Fang, S. Lu, C.-R. Wang, C.-Z. Yao, H.-Q. Cao and J. Yu, *Nat. Commun.*, 2022, **13**, 7065.

[2] (a) Z.-L. Ren, Z.-R. Guan, H.-H. Kong and M.-W. Ding, *Org. Chem. Front.*, 2017, **4**, 2044; (b) Z.-L. Ren, W.-T. Lu, S. Cai, M.-M. Xiao, Y.-F. Yuan, P. He and M.-W. Ding, *J. Org. Chem.*, 2019, **84**, 14911; (c) M. Sun, L. Zhao and M.-W. Ding, *J. Org. Chem.*, 2019, **84**, 14313.

### 1.3. Reaction conditions optimization

**Supplementary Table S1.** Optimization of the solvents<sup>a</sup>.

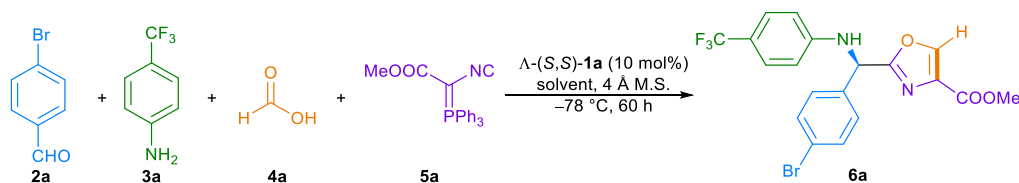

| entry | solvent           | yield (%) <sup>b</sup> | er (%) <sup>c</sup> |
|-------|-------------------|------------------------|---------------------|
| 1     | toluene           | 58                     | 89.5:10.5           |
| 2     | CCl <sub>4</sub>  | 46                     | 69:31               |
| 3     | CHCl <sub>3</sub> | 32                     | 65:35               |
| 4     | benzotrifluoride  | 50                     | 60:40               |
| 5     | cyclohexane       | -                      | -                   |
| 6     | TBME              | -                      | -                   |

<sup>a</sup> **2a** (0.12 mmol), **3a** (0.10 mmol), **4a** (1.5 mmol), **5a** (0.30 mmol), 4 Å MS (50.0 mg) and  $\Delta$ -(S,S)-**1a** (0.01 mmol) in solvents (1.5 mL) for 60 h, **4a** was divided into three equal parts and added at 12 hours apart. <sup>b</sup> Isolated yields were based on **3a**. <sup>c</sup> er values were determined by chiral stationary HPLC.

**Supplementary Table S2.** Optimization equivalents<sup>a</sup>.

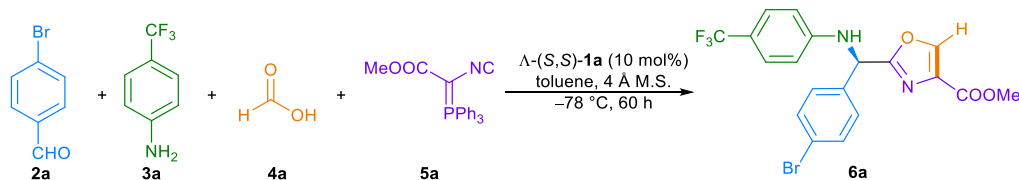

| entry | <b>2a:3a:4a:5a</b> | yield (%) <sup>b</sup> | er (%) <sup>c</sup> |
|-------|--------------------|------------------------|---------------------|
| 1     | 1.2:1.0:5.0:3.0    | 32                     | 70:30               |
| 2     | 1.2:1.0:10:3.0     | 58                     | 71:29               |
| 3     | 1.5:1.0:15:3.0     | 61                     | 89.5:10.5           |
| 4     | 1.2:1.0:20:3.0     | 60                     | 85:15               |

<sup>a</sup> **2a**, **3a** (0.10 mmol), **4a**, **5a**, 4 Å MS (50.0 mg) and  $\Delta$ -(S,S)-**1a** (0.01 mmol) in toluene (1.5 mL) for 60 h, **4a** was divided into three equal parts and added at 12 hours apart. <sup>b</sup> Isolated yields were based on **3a**. <sup>c</sup> er values were determined by chiral stationary HPLC.

## 2. Experimental Procedures of Asymmetric Ugi/Wittig Reaction and Characterization Data

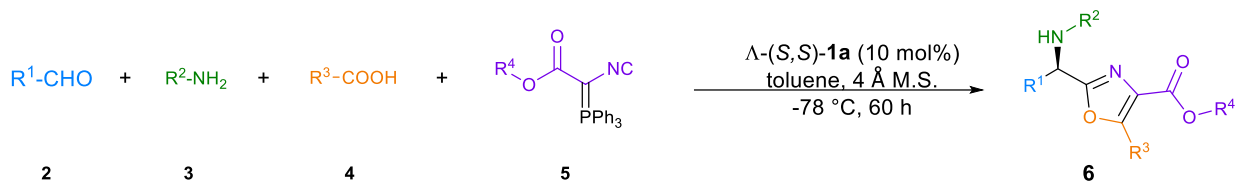

### General Procedure A: Synthesis of racemic oxazole compounds via Ugi/Wittig reactions

To a 10-mL oven-dried tube was added aldehyde **2** (0.10 mmol), amine **3** (0.10 mmol), acid **4** (0.10 mmol), isocyanide (triphenylphosphoranylidene) acetates **5** (0.10 mmol) and MeOH (1.0 mL). The solution was stirred overnight and then the solvent was removed under reduced pressure. The residue was purified by flash column chromatography to give the racemic oxazole compounds.

### General Procedure B: Synthesis of chiral oxazole compounds via asymmetric Ugi/Wittig reactions

A 10-mL oven-dried tube was charged with aldehyde **2** (0.12 mmol), amine **3** (0.10 mmol), catalyst Δ-(*S,S*)-**1a** (0.01 mmol), 4 Å MS (50.0 mg), and toluene (1.5 mL) at room temperature and stirred for 30 min. Then isocyanide (triphenylphosphoranylidene)acetates **5** (0.30 mmol) was added. The mixture was cooled to  $-78\text{ }^\circ\text{C}$  and stirred for another 30 min. The carboxylic acid **4** (1.50 mmol) was divided into 0.5 mmol parts added at 12 hours intervals was stirred vigorously for 60 h. The reaction was then quenched with pre-cooled  $\text{NEt}_3$  ( $-78\text{ }^\circ\text{C}$ , 1.0 mmol). The mixture was purified by flash column chromatography (silica gel, petroleum ether/diethyl ether = 1:1) to give the enantioenriched oxazole compounds.

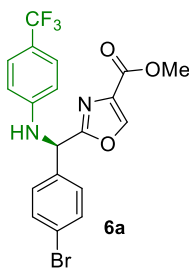

**Methyl (*R*)-2-((4-bromophenyl)((4-(trifluoromethyl)phenyl)amino)methyl)oxazole-4-carboxylate **6a**:** yield: 26.3 mg (58%); (Flash column chromatography eluent, petroleum ether/diethyl ether = 1/1); yellow oil;  $[\alpha]_{\text{D}}^{20} = -24.3$  (c 0.13  $\text{CH}_2\text{Cl}_2$ );  $^1\text{H-NMR}$  (600 MHz,  $\text{CDCl}_3$ )  $\delta$  8.17 (s, 1H), 7.51 (d,  $J = 8.4$  Hz, 2H), 7.38 (dd,  $J = 8.0, 4.7$  Hz, 4H), 6.65 (d,  $J = 8.4$  Hz, 2H), 5.73 (d,  $J = 5.8$  Hz, 1H), 5.41 (d,  $J = 5.6$  Hz, 1H), 3.92 (s, 3H);  $^{13}\text{C-NMR}$  (151 MHz,  $\text{CDCl}_3$ )  $\delta$  163.5, 161.2, 148.0, 144.6, 136.3, 133.5, 132.5, 128.7, 126.8 (q,  $J = 3.8$  Hz), 124.7 (q,  $J = 270.8$  Hz), 123.1, 120.8 (d,  $J = 33.2$  Hz), 113.0, 55.7, 52.4;  $^{19}\text{F-NMR}$  (564 MHz,  $\text{CDCl}_3$ )  $\delta$   $-61.4$ ; **HRMS (ESI)** calculated for  $\text{C}_{19}\text{H}_{14}^{79}\text{BrF}_3\text{N}_2\text{O}_3$   $[\text{M}+\text{Na}]^+$ : 477.0038, found: 477.0035; **HRMS (ESI)** calculated for

$C_{19}H_{14}^{81}BrF_3N_2O_3$   $[M+Na]^+$ : 479.0017, found: 479.0016; **Enantiomeric ratio**: 89.5:10.5, determined by HPLC (Daicel Chirapak IF, isopropanol/*n*-hexane = 30/70, flow rate = 1.0 mL/min, T = 30 °C,  $\lambda$  = 254 nm):  $t_R$  = 5.35 min (minor),  $t_R$  = 6.25 min (major).

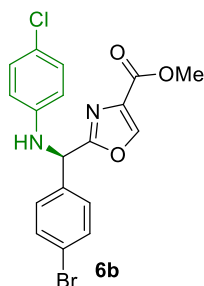

**Methyl (*R*)-2-((4-bromophenyl)((4-chlorophenyl)amino)methyl)oxazole-4-carboxylate 6b**: yield: 25.2 mg (60%); (Flash column chromatography eluent, petroleum ether/diethyl ether = 1/1); yellow oil;  $[\alpha]_D^{20}$  = -12.7 (c 0.25  $CH_2Cl_2$ );  **$^1H$ -NMR** (600 MHz,  $CDCl_3$ )  $\delta$  8.16 (s, 1H), 7.49 (d,  $J$  = 8.2 Hz, 2H), 7.36 (d,  $J$  = 8.2 Hz, 2H), 7.09 (d,  $J$  = 8.5 Hz, 2H), 6.55 (d,  $J$  = 8.5 Hz, 2H), 5.66 (d,  $J$  = 5.8 Hz, 1H), 5.03 (d,  $J$  = 5.6 Hz, 1H), 3.91 (s, 3H);  **$^{13}C$ -NMR** (151 MHz,  $CDCl_3$ )  $\delta$  163.9, 161.3, 144.6, 144.2, 136.7, 133.5, 132.4, 129.3, 128.8, 123.9, 123.0, 115.0, 56.2, 52.4; **HRMS (ESI)** calculated for  $C_{18}H_{14}^{79}Br^{35}ClN_2O_3$   $[M+Na]^+$ : 442.9774, found: 442.9772; **HRMS (ESI)** calculated for  $C_{18}H_{14}^{81}Br^{35}ClN_2O_3$   $[M+Na]^+$ : 444.9754, found: 442.9757; **HRMS (ESI)** calculated for  $C_{18}H_{14}^{81}Br^{37}ClN_2O_3$   $[M+Na]^+$ : 446.9724, found: 446.9714; **Enantiomeric ratio**: 93:7, determined by HPLC (Daicel Chirapak IF, isopropanol/*n*-hexane = 30/70, flow rate = 1.0 mL/min, T = 30 °C,  $\lambda$  = 254 nm):  $t_R$  = 6.82 min (minor),  $t_R$  = 7.97 min (major).

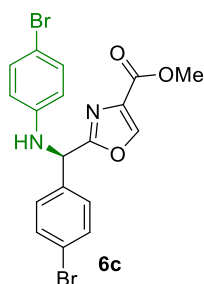

**Methyl (*R*)-2-((4-bromophenyl)((4-bromophenyl)amino)methyl)oxazole-4-carboxylate 6c**: yield: 23.2 mg (50%); (Flash column chromatography eluent, petroleum ether/diethyl ether = 1/1); yellow oil;  $[\alpha]_D^{20}$  = -6.3 (c 0.37  $CH_3OH$ );  **$^1H$ -NMR** (600 MHz,  $CDCl_3$ )  $\delta$  8.16 (s, 1H), 7.49 (d,  $J$  = 8.3 Hz, 2H), 7.36 (d,  $J$  = 8.2 Hz, 2H), 7.22 (d,  $J$  = 8.6 Hz, 2H), 6.50 (d,  $J$  = 8.6 Hz, 2H), 5.66 (d,  $J$  = 6.0 Hz, 1H), 5.06 (d,  $J$  = 5.8 Hz, 1H), 3.91 (s, 3H);  **$^{13}C$ -NMR** (151 MHz,  $CDCl_3$ )  $\delta$  163.8, 161.3, 144.6, 144.6, 136.6, 133.5, 132.4, 132.2, 128.8, 122.9, 115.4, 110.9, 56.1, 52.4; **HRMS (ESI)** calculated for  $C_{18}H_{14}^{79}Br_2N_2O_3$   $[M+Na]^+$ : 486.9269, found: 486.9274; **HRMS (ESI)** calculated for  $C_{18}H_{14}^{79}Br^{81}BrN_2O_3$   $[M+Na]^+$ : 488.9248, found: 488.9251; **HRMS (ESI)** calculated for  $C_{18}H_{14}^{81}Br_2N_2O_3$   $[M+Na]^+$ : 490.9228, found: 490.9231; **Enantiomeric ratio**: 91:9, determined by

HPLC (Daicel Chirapak IF, isopropanol/*n*-hexane = 30/70, flow rate = 1.0 mL/min, T = 30 °C,  $\lambda$  = 254 nm):  $t_R$  = 7.01 min (minor),  $t_R$  = 8.05 min (major).

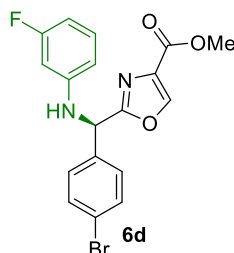

**Methyl (*R*)-2-((4-bromophenyl)((3-fluorophenyl)amino)methyl)oxazole-4-carboxylate 6d:** yield: 20.3 mg (50%); (Flash column chromatography eluent, petroleum ether/diethyl ether = 1/1); white oil;  $[\alpha]_D^{20}$  = -10.0 (c 0.15 CH<sub>3</sub>OH); **<sup>1</sup>H-NMR** (600 MHz, CDCl<sub>3</sub>)  $\delta$  8.17 (s, 1H), 7.50 (d,  $J$  = 8.3 Hz, 2H), 7.37 (d,  $J$  = 8.2 Hz, 2H), 7.08 (dd,  $J$  = 15.0, 7.9 Hz, 1H), 6.42 (dd,  $J$  = 20.0, 8.2 Hz, 2H), 6.30 (d,  $J$  = 11.2 Hz, 1H), 5.67 (d,  $J$  = 5.9 Hz, 1H), 5.16 (d,  $J$  = 5.6 Hz, 1H), 3.92 (s, 3H); **<sup>13</sup>C-NMR** (151 MHz, CDCl<sub>3</sub>)  $\delta$  163.8 (d,  $J$  = 243.8 Hz), 163.6, 161.1, 147.2 (d,  $J$  = 10.4 Hz), 144.4, 136.5, 133.3, 132.3, 130.4 (d,  $J$  = 10.2 Hz), 128.6, 122.7, 109.3, 105.4 (d,  $J$  = 21.5 Hz), 100.6 (d,  $J$  = 25.7 Hz), 55.8, 52.2; **<sup>19</sup>F-NMR** (564 MHz, CDCl<sub>3</sub>)  $\delta$  -112.1; **HRMS (ESI)** calculated for C<sub>18</sub>H<sub>14</sub><sup>79</sup>BrFN<sub>2</sub>O<sub>3</sub> [M+Na]<sup>+</sup>: 427.0070, found: 427.0066; **HRMS (ESI)** calculated for C<sub>18</sub>H<sub>14</sub><sup>81</sup>BrFN<sub>2</sub>O<sub>3</sub> [M+Na]<sup>+</sup>: 429.0049, found: 429.0048; **Enantiomeric ratio:** 89:11, determined by HPLC (Daicel Chirapak IF, isopropanol/*n*-hexane = 30/70, flow rate = 1.0 mL/min, T = 30 °C,  $\lambda$  = 254 nm):  $t_R$  = 6.19 min (minor),  $t_R$  = 7.04 min (major).

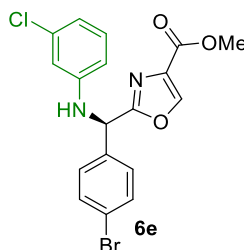

**Methyl (*R*)-2-((4-bromophenyl)((3-chlorophenyl)amino)methyl)oxazole-4-carboxylate 6e:** yield: 22.3 mg (53%); (Flash column chromatography eluent, petroleum ether/diethyl ether = 1/1); white oil;  $[\alpha]_D^{20}$  = -43.3 (c 0.05 CH<sub>2</sub>Cl<sub>2</sub>); **<sup>1</sup>H-NMR** (600 MHz, CDCl<sub>3</sub>)  $\delta$  8.17 (s, 1H), 7.50 (d,  $J$  = 8.3 Hz, 2H), 7.37 (d,  $J$  = 8.3 Hz, 2H), 7.05 (t,  $J$  = 8.0 Hz, 1H), 6.72 (d,  $J$  = 7.9 Hz, 1H), 6.60 (s, 1H), 6.50 (d,  $J$  = 8.2 Hz, 1H), 5.68 (d,  $J$  = 6.0 Hz, 1H), 5.12 (d,  $J$  = 6.0 Hz, 1H), 3.92 (s, 3H); **<sup>13</sup>C-NMR** (151 MHz, CDCl<sub>3</sub>)  $\delta$  163.8, 161.2, 146.7, 144.5, 136.6, 135.2, 133.5, 132.4, 130.4, 128.8, 122.9, 119.0, 113.6, 111.9, 55.9, 52.4; **HRMS (ESI)** calculated for C<sub>18</sub>H<sub>14</sub><sup>79</sup>Br<sup>37</sup>ClN<sub>2</sub>O<sub>3</sub> [M+Na]<sup>+</sup>: 444.9745, found: 444.9748; **HRMS (ESI)** calculated for C<sub>18</sub>H<sub>14</sub><sup>81</sup>Br<sup>35</sup>ClN<sub>2</sub>O<sub>3</sub> [M+Na]<sup>+</sup>: 444.9754, found: 446.9749; **HRMS (ESI)** calculated for C<sub>18</sub>H<sub>14</sub><sup>81</sup>Br<sup>37</sup>ClN<sub>2</sub>O<sub>3</sub> [M+Na]<sup>+</sup>: 446.9724, found: 446.9729;

**Enantiomeric ratio:** 85.5:14.5, determined by HPLC (Daicel Chirapak IF, isopropanol/*n*-hexane = 30/70, flow rate = 1.0 mL/min, T = 30 °C,  $\lambda$  = 254 nm):  $t_R$  = 6.49 min (minor),  $t_R$  = 6.97 min (major).

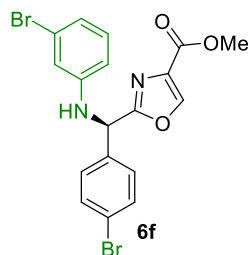

**Methyl (*R*)-2-((4-bromophenyl)((3-bromophenyl)amino)methyl)oxazole-4-carboxylate 6f:** yield: 23.2 mg (50%); (Flash column chromatography eluent, petroleum ether/diethyl ether = 1/1); white oil;  $[\alpha]_D^{20}$  = -25.9 (c 0.12 CH<sub>2</sub>Cl<sub>2</sub>); **<sup>1</sup>H-NMR** (600 MHz, CDCl<sub>3</sub>)  $\delta$  8.17 (s, 1H), 7.50 (d,  $J$  = 8.3 Hz, 2H), 7.36 (d,  $J$  = 8.3 Hz, 2H), 6.99 (t,  $J$  = 8.0 Hz, 1H), 6.86 (d,  $J$  = 7.9 Hz, 1H), 6.77 (s, 1H), 6.54 (dd,  $J$  = 8.1, 1.6 Hz, 1H), 5.67 (d,  $J$  = 6.1 Hz, 1H), 5.11 (d,  $J$  = 6.0 Hz, 1H), 3.92 (s, 3H); **<sup>13</sup>C-NMR** (151 MHz, CDCl<sub>3</sub>)  $\delta$  163.8, 161.3, 146.9, 144.6, 136.6, 133.5, 132.5, 130.7, 128.8, 123.4, 123.0, 121.9, 116.6, 112.3, 55.9, 52.4; **HRMS (ESI)** calculated for C<sub>18</sub>H<sub>14</sub><sup>79</sup>Br<sub>2</sub>N<sub>2</sub>O<sub>3</sub> [M+Na]<sup>+</sup>: 486.9269, found: 486.9261; **HRMS (ESI)** calculated for C<sub>18</sub>H<sub>14</sub><sup>79</sup>Br<sup>81</sup>BrN<sub>2</sub>O<sub>3</sub> [M+Na]<sup>+</sup>: 488.9248, found: 488.9256; **HRMS (ESI)** calculated for C<sub>18</sub>H<sub>14</sub><sup>81</sup>Br<sub>2</sub>N<sub>2</sub>O<sub>3</sub> [M+Na]<sup>+</sup>: 490.9228, found: 490.9231; **Enantiomeric ratio:** 85.5:14.5, determined by HPLC (Daicel Chirapak IB, isopropanol/*n*-hexane = 30/70, flow rate = 1.0 mL/min, T = 30 °C,  $\lambda$  = 254 nm):  $t_R$  = 7.08 min (major),  $t_R$  = 10.29 min (minor).

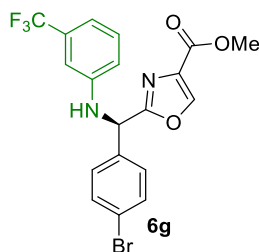

**Methyl (*R*)-2-((4-bromophenyl)((3-(trifluoromethyl)phenyl)amino)methyl)oxazole-4-carboxylate 6g:** yield: 19.1 mg (42%); (Flash column chromatography eluent, petroleum ether/diethyl ether = 1/1); white oil;  $[\alpha]_D^{20}$  = -9.8 (c 0.37 CH<sub>2</sub>Cl<sub>2</sub>); **<sup>1</sup>H-NMR** (600 MHz, CDCl<sub>3</sub>)  $\delta$  8.17 (s, 1H), 7.51 (d,  $J$  = 8.2 Hz, 2H), 7.38 (d,  $J$  = 8.3 Hz, 2H), 7.23 (t,  $J$  = 7.9 Hz, 1H), 6.98 (d,  $J$  = 7.6 Hz, 1H), 6.86 (s, 1H), 6.75 (d,  $J$  = 8.0 Hz, 1H), 5.72 (d,  $J$  = 6.0 Hz, 1H), 5.27 (d,  $J$  = 5.8 Hz, 1H), 3.92 (s, 3H); **<sup>13</sup>C-NMR** (151 MHz, CDCl<sub>3</sub>)  $\delta$  163.7, 161.2, 145.8, 144.6, 136.4, 133.5, 132.5, 131.7 (q,  $J$  = 31.9 Hz), 129.9, 128.8, 125.4 (q,  $J$  = 272.5 Hz), 123.2, 123.0, 121.43, 116.4, 115.5 (q,  $J$  = 3.9 Hz), 110.3 (q,  $J$  = 4.0 Hz), 55.9, 52.3; **<sup>19</sup>F-NMR** (564 MHz, CDCl<sub>3</sub>)  $\delta$  -63.0; **HRMS (ESI)** calculated for C<sub>19</sub>H<sub>14</sub><sup>79</sup>BrF<sub>3</sub>N<sub>2</sub>O<sub>3</sub> [M+Na]<sup>+</sup>: 477.0038, found: 477.0035; **HRMS (ESI)** calculated for C<sub>19</sub>H<sub>14</sub><sup>81</sup>BrF<sub>3</sub>N<sub>2</sub>O<sub>3</sub> [M+Na]<sup>+</sup>: 479.0017, found: 479.0016; **Enantiomeric ratio:** 82.5:17.5, determined

by HPLC (Daicel Chirapak IB, isopropanol/*n*-hexane = 10/90, flow rate = 1.0 mL/min, T = 30 °C,  $\lambda$  = 254 nm):  $t_R$  = 10.12 min (major),  $t_R$  = 11.76 min (minor).

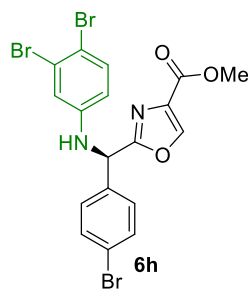

**Methyl (*R*)-2-(((4-bromophenyl)((3,4-dibromophenyl)amino)methyl)oxazole-4-carboxylate 6h:** yield: 31.1 mg (57%); (Flash column chromatography eluent, petroleum ether/diethyl ether = 1/1); white flocculent;  $[\alpha]_D^{20}$  = -18.0 (c 0.11 CH<sub>2</sub>Cl<sub>2</sub>); **<sup>1</sup>H-NMR** (600 MHz, CDCl<sub>3</sub>)  $\delta$  8.17 (s, 1H), 7.51 (d,  $J$  = 8.4 Hz, 2H), 7.34 (d,  $J$  = 8.4 Hz, 2H), 7.31 (d,  $J$  = 8.7 Hz, 1H), 6.89 (d,  $J$  = 2.6 Hz, 1H), 6.44 (dd,  $J$  = 8.7, 2.7 Hz, 1H), 5.63 (d,  $J$  = 6.1 Hz, 1H), 5.16 (d,  $J$  = 6.0 Hz, 1H), 3.92 (s, 3H); **<sup>13</sup>C-NMR** (151 MHz, CDCl<sub>3</sub>)  $\delta$  163.5, 161.2, 145.6, 144.7, 136.2, 133.9, 133.5, 132.6, 128.8, 125.4, 123.1, 118.4, 114.2, 113.0, 55.9, 52.4; **HRMS (ESI)** calculated for C<sub>18</sub>H<sub>13</sub><sup>79</sup>Br<sub>3</sub>N<sub>2</sub>O<sub>3</sub> [M+H]<sup>+</sup>: 542.8555, found: 542.8555; **Enantiomeric ratio:** 77:23, determined by HPLC (Daicel Chirapak IB, isopropanol/*n*-hexane = 30/70, flow rate = 1.0 mL/min, T = 30 °C,  $\lambda$  = 254 nm):  $t_R$  = 8.57 min (major),  $t_R$  = 9.80 min (minor).

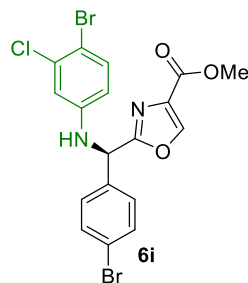

**Methyl (*R*)-2-(((4-bromo-3-chlorophenyl)amino)(4-bromophenyl)methyl)oxazole-4-carboxylate 6i:** yield: 20.0 mg (40%); (Flash column chromatography eluent, petroleum ether/diethyl ether = 1/1); white flocculent;  $[\alpha]_D^{20}$  = -25.5 (c 0.08 CH<sub>2</sub>Cl<sub>2</sub>); **<sup>1</sup>H-NMR** (600 MHz, CDCl<sub>3</sub>)  $\delta$  8.17 (s, 1H), 7.51 (d,  $J$  = 8.4 Hz, 2H), 7.35 (d,  $J$  = 8.3 Hz, 2H), 7.31 (d,  $J$  = 8.7 Hz, 1H), 6.71 (d,  $J$  = 2.6 Hz, 1H), 6.40 (dd,  $J$  = 8.7, 2.6 Hz, 1H), 5.63 (d,  $J$  = 6.1 Hz, 1H), 5.18 (d,  $J$  = 5.9 Hz, 1H), 3.92 (s, 3H); **<sup>13</sup>C-NMR** (151 MHz, CDCl<sub>3</sub>)  $\delta$  163.5, 161.2, 145.7, 144.7, 136.2, 135.1, 134.1, 133.5, 132.6, 128.8, 123.1, 115.2, 113.7, 110.6, 55.9, 52.4; **HRMS (ESI)** calculated for C<sub>18</sub>H<sub>13</sub><sup>79</sup>Br<sub>2</sub><sup>35</sup>ClN<sub>2</sub>O<sub>3</sub> [M+Na]<sup>+</sup>: 520.8879, found: 520.8871; **HRMS (ESI)** calculated for C<sub>18</sub>H<sub>13</sub><sup>79</sup>Br<sub>2</sub><sup>37</sup>ClN<sub>2</sub>O<sub>3</sub> [M+Na]<sup>+</sup>: 522.8850, found: 522.8848; **HRMS (ESI)** calculated for C<sub>18</sub>H<sub>13</sub><sup>79</sup>Br<sup>81</sup>Br<sup>37</sup>ClN<sub>2</sub>O<sub>3</sub> [M+Na]<sup>+</sup>: 524.8829, found: 524.8827; **Enantiomeric ratio:** 78:22, determined by HPLC (Daicel Chirapak IB, isopropanol/*n*-



hexane = 30/70, flow rate = 1.0 mL/min, T = 30 °C,  $\lambda$  = 254 nm):  $t_R$  = 8.10 min (major),  $t_R$  = 9.02 min (minor).

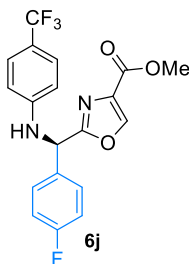

**Methyl (R)-2-((4-fluorophenyl)((4-(trifluoromethyl)phenyl)amino)methyl)oxazole-4-carboxylate 6j**: yield: 20.1 mg (51%); (Flash column chromatography eluent, petroleum ether/diethyl ether = 1/1); white flocculent;  $[\alpha]_D^{20}$  = -17.7 (c 0.11 CH<sub>2</sub>Cl<sub>2</sub>); <sup>1</sup>H-NMR (600 MHz, CDCl<sub>3</sub>)  $\delta$  8.18 (s, 1H), 7.47 (dd,  $J$  = 7.4, 5.4 Hz, 2H), 7.38 (d,  $J$  = 8.2 Hz, 2H), 7.07 (t,  $J$  = 8.3 Hz, 2H), 6.65 (d,  $J$  = 8.2 Hz, 2H), 5.76 (d,  $J$  = 5.6 Hz, 1H), 5.38 (d,  $J$  = 5.2 Hz, 1H), 3.92 (s, 3H); <sup>13</sup>C-NMR (151 MHz, CDCl<sub>3</sub>)  $\delta$  163.9, 163.8, 162.1, 161.2, 148.1, 144.6, 133.4,  $\delta$  133.1 (q,  $J$  = 3.3 Hz), 128.9, 128.8, 127.4, 126.8 (q,  $J$  = 3.7 Hz), 124.7 (q,  $J$  = 270.6 Hz), 120.6 (q,  $J$  = 32.5 Hz), 116.4, 116.2, 113.0, 55.5, 52.4; <sup>19</sup>F-NMR (564 MHz, CDCl<sub>3</sub>)  $\delta$  -112.6, -61.4; **HRMS (ESI)** calculated for C<sub>19</sub>H<sub>14</sub>F<sub>4</sub>N<sub>2</sub>O<sub>3</sub> [M+Na]<sup>+</sup>: 417.0838, found: 417.0840; **Enantiomeric ratio**: 92:8, determined by HPLC (Daicel Chirapak IF, isopropanol/*n*-hexane = 30/70, flow rate = 1.0 mL/min, T = 30 °C,  $\lambda$  = 254 nm):  $t_R$  = 4.87 min (minor),  $t_R$  = 5.62 min (major).

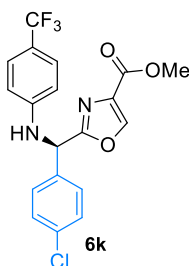

**Methyl (R)-2-((4-chlorophenyl)((4-(trifluoromethyl)phenyl)amino)methyl)oxazole-4-carboxylate 6k**: yield: 20.5 mg (50%); (Flash column chromatography eluent, petroleum ether/diethyl ether = 1/1); white flocculent;  $[\alpha]_D^{20}$  = -20.9 (c 0.17 CH<sub>2</sub>Cl<sub>2</sub>); <sup>1</sup>H-NMR (600 MHz, CDCl<sub>3</sub>)  $\delta$  8.17 (s, 1H), 7.43 (d,  $J$  = 8.4 Hz, 2H), 7.37 (dd,  $J$  = 18.2, 8.4 Hz, 4H), 6.65 (d,  $J$  = 8.4 Hz, 2H), 5.75 (d,  $J$  = 5.8 Hz, 1H), 5.40 (d,  $J$  = 5.6 Hz, 1H), 3.92 (s, 3H); <sup>13</sup>C-NMR (151 MHz, CDCl<sub>3</sub>)  $\delta$  163.6, 161.2, 148.1, 144.6, 135.8, 134.9, 133.5, 129.5, 128.4, 127.4,  $\delta$  126.8 (q,  $J$  = 3.7 Hz), 124.7 (q,  $J$  = 270.6 Hz), 122.0, 120.7 (q,  $J$  = 32.8 Hz), 113.0, 55.6, 52.4; <sup>19</sup>F-NMR (564 MHz, CDCl<sub>3</sub>)  $\delta$  -61.4; **HRMS (ESI)** calculated for C<sub>19</sub>H<sub>14</sub><sup>35</sup>ClF<sub>3</sub>N<sub>2</sub>O<sub>3</sub> [M+Na]<sup>+</sup>: 433.0543, found: 433.0540; **HRMS (ESI)** calculated for C<sub>19</sub>H<sub>14</sub><sup>37</sup>ClF<sub>3</sub>N<sub>2</sub>O<sub>3</sub> [M+Na]<sup>+</sup>: 435.0513, found: 435.0504; **Enantiomeric ratio**: 92:8, determined by HPLC (Daicel Chirapak IF, isopropanol/*n*-hexane = 30/70, flow rate = 1.0 mL/min, T = 30 °C,  $\lambda$  = 254 nm):  $t_R$  = 5.15 min (minor),  $t_R$  = 6.02 min (major).

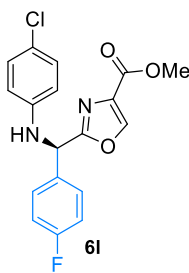

**Methyl (*R*)-2-(((4-chlorophenyl)amino)(4-fluorophenyl)methyl)oxazole-4-carboxylate 6l:** yield: 21.2 mg (56%); (Flash column chromatography eluent, petroleum ether/diethyl ether = 1/1); yellow flocculent;  $[\alpha]_D^{20} = -25.5$  (c 0.08 CH<sub>2</sub>Cl<sub>2</sub>); **<sup>1</sup>H-NMR** (600 MHz, CDCl<sub>3</sub>)  $\delta$  8.16 (s, 1H), 7.46 (dd,  $J = 8.4, 5.3$  Hz, 2H), 7.15 – 6.96 (m, 4H), 6.56 (d,  $J = 8.7$  Hz, 2H), 5.69 (d,  $J = 6.0$  Hz, 1H), 5.00 (d,  $J = 5.9$  Hz, 1H), 3.92 (s, 3H); **<sup>13</sup>C-NMR** (151 MHz, CDCl<sub>3</sub>)  $\delta$  163.7, 162.8 (d,  $J = 443.0$  Hz), 162.0, 144.5, 144.2, 133.4, 133.4, 129.3, 128.9, 128.9, 123.7, 116.3 (d,  $J = 21.8$  Hz), 114.9, 56.0, 52.3; **<sup>19</sup>F-NMR** (564 MHz, CDCl<sub>3</sub>)  $\delta$  -112.9; **HRMS (ESI)** calculated for C<sub>18</sub>H<sub>14</sub><sup>35</sup>ClFN<sub>2</sub>O<sub>3</sub> [M+Na]<sup>+</sup>: 383.0575, found: 383.0578; **HRMS (ESI)** calculated for C<sub>18</sub>H<sub>14</sub><sup>37</sup>ClFN<sub>2</sub>O<sub>3</sub> [M+Na]<sup>+</sup>: 385.0545, found: 385.0547; **Enantiomeric ratio:** 90:10, determined by HPLC (Daicel Chirapak IF, isopropanol/*n*-hexane = 30/70, flow rate = 1.0 mL/min, T = 30 °C,  $\lambda$  = 254 nm):  $t_R$  = 6.00 min (minor),  $t_R$  = 6.88 min (major).

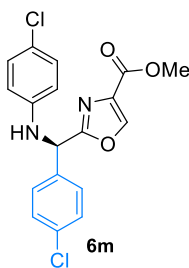

**Methyl (*R*)-2-(((4-chlorophenyl)((4-chlorophenyl)amino)methyl)oxazole-4-carboxylate 6m:** yield: 22.3 mg (59%); (Flash column chromatography eluent, petroleum ether/diethyl ether = 1/1); yellow oil;  $[\alpha]_D^{20} = -36.0$  (c 0.11 CH<sub>2</sub>Cl<sub>2</sub>); **<sup>1</sup>H-NMR** (600 MHz, CDCl<sub>3</sub>)  $\delta$  8.16 (s, 1H), 7.42 (d,  $J = 8.3$  Hz, 2H), 7.34 (d,  $J = 8.3$  Hz, 2H), 7.09 (d,  $J = 8.6$  Hz, 2H), 6.55 (d,  $J = 8.6$  Hz, 2H), 5.68 (d,  $J = 5.9$  Hz, 1H), 5.03 (d,  $J = 5.7$  Hz, 1H), 3.92 (s, 3H); **<sup>13</sup>C-NMR** (151 MHz, CDCl<sub>3</sub>)  $\delta$  164.0, 161.3, 144.5, 144.2, 136.1, 134.8, 133.4, 129.4, 129.3, 128.5, 123.8, 114.9, 56.1, 52.3; **HRMS (ESI)** calculated for C<sub>18</sub>H<sub>14</sub><sup>35</sup>Cl<sub>2</sub>N<sub>2</sub>O<sub>3</sub> [M+Na]<sup>+</sup>: 399.0279, found: 399.0284; **HRMS (ESI)** calculated for C<sub>18</sub>H<sub>14</sub><sup>35</sup>Cl<sup>37</sup>ClN<sub>2</sub>O<sub>3</sub> [M+Na]<sup>+</sup>: 401.0250, found: 401.0250; **Enantiomeric ratio:** 89.5:10.5 (The enantioselectivity could be improved to 94.5:5.5 or via recrystallization in DCM:heptane = 1:5), determined by HPLC (Daicel Chirapak IF, isopropanol/*n*-hexane = 30/70, flow rate = 1.0 mL/min, T = 30 °C,  $\lambda$  = 254 nm):  $t_R$  = 6.32 min (minor),  $t_R$  = 7.31 min (major).

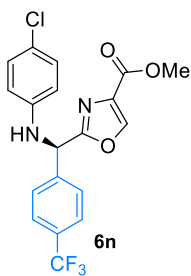

**Methyl (*R*)-2-(((4-chlorophenyl)amino)(4-(trifluoromethyl)phenyl)methyl)oxazole-4-carboxylate 6n**: yield: 22.2 mg (54%); (Flash column chromatography eluent, petroleum ether/diethyl ether = 1/1); yellow oil;  $[\alpha]_{\text{D}}^{20} = -14.2$  (c 0.19  $\text{CH}_2\text{Cl}_2$ );  $^1\text{H-NMR}$  (600 MHz,  $\text{CDCl}_3$ )  $\delta$  8.17 (s, 1H), 7.63 (d,  $J = 8.3$  Hz, 4H), 7.10 (d,  $J = 8.8$  Hz, 2H), 6.56 (d,  $J = 8.8$  Hz, 2H), 5.77 (d,  $J = 6.0$  Hz, 1H), 5.11 (d,  $J = 5.9$  Hz, 1H), 3.92 (s, 3H);  $^{13}\text{C-NMR}$  (151 MHz,  $\text{CDCl}_3$ )  $\delta$  163.6, 161.2, 144.6, 144.0, 141.6, 133.5, 131.17 (q,  $J = 32.6$  Hz), 129.3, 127.6, 126.2 (q,  $J = 3.6$  Hz), 124.0, 123.8 (q,  $J = 272.3$  Hz), 114.9, 56.3, 52.4;  $^{19}\text{F-NMR}$  (564 MHz,  $\text{CDCl}_3$ )  $\delta$  -62.7; **HRMS (ESI)** calculated for  $\text{C}_{19}\text{H}_{14}^{35}\text{ClF}_3\text{N}_2\text{O}_3$   $[\text{M}+\text{Na}]^+$ : 433.0543, found: 433.0545; **HRMS (ESI)** calculated for  $\text{C}_{19}\text{H}_{14}^{37}\text{ClF}_3\text{N}_2\text{O}_3$   $[\text{M}+\text{Na}]^+$ : 435.0513, found: 435.0514; **Enantiomeric ratio**: 91:9, determined by HPLC (Daicel Chirapak IF, isopropanol/*n*-hexane = 30/70, flow rate = 1.0 mL/min,  $T = 30^\circ\text{C}$ ,  $\lambda = 254$  nm):  $t_{\text{R}} = 5.29$  min (minor),  $t_{\text{R}} = 6.17$  min (major).

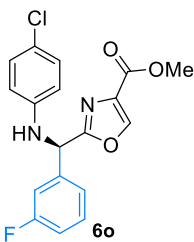

**Methyl (*R*)-2-(((4-chlorophenyl)amino)(3-fluorophenyl)methyl)oxazole-4-carboxylate 6o**: yield: 22.7 mg (63%); (Flash column chromatography eluent, petroleum ether/diethyl ether = 1/1); yellow flocculent;  $[\alpha]_{\text{D}}^{20} = -25.6$  (c 0.06  $\text{CH}_2\text{Cl}_2$ );  $^1\text{H-NMR}$  (600 MHz,  $\text{CDCl}_3$ )  $\delta$  8.17 (s, 1H), 7.33 (dd,  $J = 7.8, 5.9$  Hz, 1H), 7.27 (s, 1H), 7.20 (d,  $J = 9.4$  Hz, 1H), 7.09 (d,  $J = 8.7$  Hz, 2H), 7.05 – 6.98 (m, 1H), 6.57 (d,  $J = 8.7$  Hz, 2H), 5.70 (d,  $J = 6.1$  Hz, 1H), 5.05 (d,  $J = 6.0$  Hz, 1H), 3.92 (s, 3H);  $^{13}\text{C-NMR}$  (151 MHz,  $\text{CDCl}_3$ )  $\delta$  164.1, 162.5 (d,  $J = 388.9$  Hz), 162.4, 144.6, 144.1, 140.2 (d,  $J = 6.7$  Hz), 133.4, 130.8, 130.8, 129.3, 123.8, 122.8, 122.8, 115.8 (d,  $J = 21.2$  Hz), 114.9, 114.3, 114.1, 56.2, 56.2, 52.3;  $^{19}\text{F-NMR}$  (564 MHz,  $\text{CDCl}_3$ )  $\delta$  -111.3; **HRMS (ESI)** calculated for  $\text{C}_{18}\text{H}_{14}^{35}\text{ClFN}_2\text{O}_3$   $[\text{M}+\text{Na}]^+$ : 383.0575, found: 383.0577; **HRMS (ESI)** calculated for  $\text{C}_{18}\text{H}_{14}^{37}\text{ClFN}_2\text{O}_3$   $[\text{M}+\text{Na}]^+$ : 385.0545, found: 385.0544; **Enantiomeric ratio**: 91.5:8.5, determined by HPLC (Daicel Chirapak IF, isopropanol/*n*-hexane = 30/70, flow rate = 1.0 mL/min,  $T = 30^\circ\text{C}$ ,  $\lambda = 254$  nm):  $t_{\text{R}} = 5.81$  min (minor),  $t_{\text{R}} = 6.32$  min (major).

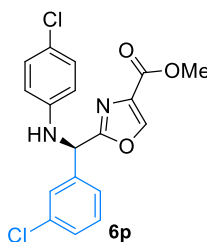

**Methyl (*R*)-2-((3-chlorophenyl)((4-chlorophenyl)amino)methyl)oxazole-4-carboxylate 6p:** yield: 18.5 mg (49%); (Flash column chromatography eluent, petroleum ether/diethyl ether = 1/1); white flocculent;  $[\alpha]_{\text{D}}^{20} = -8.8$  (c 0.19 CH<sub>2</sub>Cl<sub>2</sub>); **<sup>1</sup>H-NMR** (600 MHz, CDCl<sub>3</sub>)  $\delta$  8.17 (s, 1H), 7.49 (s, 1H), 7.36 (d, *J* = 3.9 Hz, 1H), 7.30 (d, *J* = 4.8 Hz, 2H), 7.10 (d, *J* = 8.6 Hz, 2H), 6.56 (d, *J* = 8.6 Hz, 2H), 5.67 (d, *J* = 6.0 Hz, 1H), 5.05 (d, *J* = 5.8 Hz, 1H), 3.92 (s, 3H); **<sup>13</sup>C-NMR** (151 MHz, CDCl<sub>3</sub>)  $\delta$  163.8, 161.2, 144.6, 144.1, 139.7, 135.2, 133.5, 130.5, 129.3, 129.1, 127.3, 125.3, 123.9, 114.9, 56.2, 52.4; **HRMS (ESI)** calculated for C<sub>18</sub>H<sub>14</sub><sup>35</sup>Cl<sub>2</sub>N<sub>2</sub>O<sub>3</sub> [M+Na]<sup>+</sup>: 399.0279, found: 399.0285; **HRMS (ESI)** calculated for C<sub>18</sub>H<sub>14</sub><sup>35</sup>Cl<sup>37</sup>ClN<sub>2</sub>O<sub>3</sub> [M+Na]<sup>+</sup>: 401.0250, found: 401.0255; **Enantiomeric ratio:** 89:11, determined by HPLC (Daicel Chirapak IF, isopropanol/*n*-hexane = 30/70, flow rate = 1.0 mL/min, T = 30 °C,  $\lambda$  = 254 nm): *t*<sub>R</sub> = 5.76 min (minor), *t*<sub>R</sub> = 6.30 min (major).

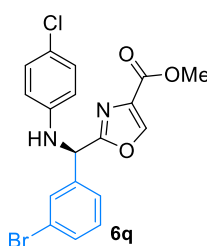

**Methyl (*R*)-2-((3-bromophenyl)((4-chlorophenyl)amino)methyl)oxazole-4-carboxylate 6q:** yield: 20.2 mg (48%); (Flash column chromatography eluent, petroleum ether/diethyl ether = 1/1); white flocculent;  $[\alpha]_{\text{D}}^{20} = -13.9$  (c 0.09 CH<sub>2</sub>Cl<sub>2</sub>); **<sup>1</sup>H-NMR** (600 MHz, CDCl<sub>3</sub>)  $\delta$  8.17 (s, 1H), 7.64 (s, 1H), 7.46 (d, *J* = 7.8 Hz, 1H), 7.41 (d, *J* = 7.8 Hz, 1H), 7.24 (t, *J* = 7.9 Hz, 1H), 7.10 (d, *J* = 8.7 Hz, 2H), 6.56 (d, *J* = 8.7 Hz, 2H), 5.66 (d, *J* = 6.0 Hz, 1H), 5.05 (d, *J* = 5.8 Hz, 1H), 3.92 (s, 3H); **<sup>13</sup>C-NMR** (151 MHz, CDCl<sub>3</sub>)  $\delta$  163.8, 161.2, 144.6, 144.1, 139.9, 133.5, 132.0, 130.7, 130.2, 129.3, 125.7, 123.9, 123.3, 114.9, 56.2, 52.4; **HRMS (ESI)** calculated for C<sub>18</sub>H<sub>14</sub><sup>79</sup>Br<sup>35</sup>ClN<sub>2</sub>O<sub>3</sub> [M+Na]<sup>+</sup>: 442.9774, found: 442.9778; **HRMS (ESI)** calculated for C<sub>18</sub>H<sub>14</sub><sup>81</sup>Br<sup>35</sup>ClN<sub>2</sub>O<sub>3</sub> [M+Na]<sup>+</sup>: 444.9754, found: 444.9754; **HRMS (ESI)** calculated for C<sub>18</sub>H<sub>14</sub><sup>81</sup>Br<sup>37</sup>ClN<sub>2</sub>O<sub>3</sub> [M+Na]<sup>+</sup>: 446.9724, found: 446.9724; **Enantiomeric ratio:** 87:13, determined by HPLC (Daicel Chirapak IF, isopropanol/*n*-hexane = 30/70, flow rate = 1.0 mL/min, T = 30 °C,  $\lambda$  = 254 nm): *t*<sub>R</sub> = 5.97 min (minor), *t*<sub>R</sub> = 6.55 min (major).

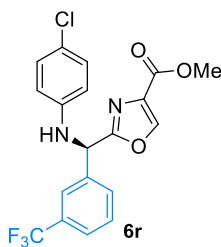

**Methyl (R)-2-(((4-chlorophenyl)amino)(3-(trifluoromethyl)phenyl)methyl)oxazole-4-carboxylate 6r**: yield: 24.2 mg (59%); (Flash column chromatography eluent, petroleum ether/diethyl ether = 1/1); white flocculent;  $[\alpha]_{\text{D}}^{20} = -8.6$  (c 0.15  $\text{CH}_2\text{Cl}_2$ );  $^1\text{H-NMR}$  (600 MHz,  $\text{CDCl}_3$ )  $\delta$  8.18 (s, 1H), 7.76 (s, 1H), 7.68 (d,  $J = 7.7$  Hz, 1H), 7.59 (d,  $J = 7.7$  Hz, 1H), 7.50 (t,  $J = 7.8$  Hz, 1H), 7.10 (d,  $J = 8.7$  Hz, 2H), 6.57 (d,  $J = 8.7$  Hz, 2H), 5.76 (d,  $J = 6.0$  Hz, 1H), 5.09 (d,  $J = 5.9$  Hz, 1H), 3.92 (s, 3H);  $^{13}\text{C-NMR}$  (151 MHz,  $\text{CDCl}_3$ )  $\delta$  163.6, 161.2, 144.6, 144.0, 138.8, 133.5, 131.7 (q,  $J = 32.5$  Hz), 130.5, 129.8, 129.3, 125.7 (q,  $J = 3.8$  Hz), 124.0 (q,  $J = 7.3, 3.5$  Hz), 123.8 (q,  $J = 272.4$  Hz), 121.1, 114.9, 56.4, 52.4;  $^{19}\text{F-NMR}$  (564 MHz,  $\text{CDCl}_3$ )  $\delta$  -62.6; **HRMS (ESI)** calculated for  $\text{C}_{19}\text{H}_{14}^{35}\text{ClF}_3\text{N}_2\text{O}_3$   $[\text{M}+\text{Na}]^+$ : 433.0543, found: 433.0547; **HRMS (ESI)** calculated for  $\text{C}_{19}\text{H}_{14}^{37}\text{ClF}_3\text{N}_2\text{O}_3$   $[\text{M}+\text{Na}]^+$ : 435.0513, found: 435.0515; **Enantiomeric ratio**: 89:11, determined by HPLC (Daicel Chirapak IF, isopropanol/*n*-hexane = 10/90, flow rate = 1.0 mL/min,  $T = 30^\circ\text{C}$ ,  $\lambda = 254$  nm):  $t_{\text{R}} = 8.06$  min (minor),  $t_{\text{R}} = 9.09$  min (major).

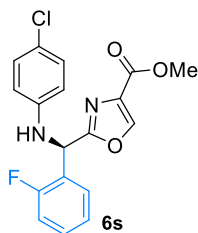

**Methyl (R)-2-(((4-chlorophenyl)amino)(2-fluorophenyl)methyl)oxazole-4-carboxylate 6s**: yield: 15.5 mg (43%); (Flash column chromatography eluent, petroleum ether/diethyl ether = 1/1); white flocculent;  $[\alpha]_{\text{D}}^{20} = -13.4$  (c 0.20  $\text{CH}_2\text{Cl}_2$ );  $^1\text{H-NMR}$  (600 MHz,  $\text{CDCl}_3$ )  $\delta$  8.17 (s, 1H), 7.43 (t,  $J = 7.5$  Hz, 1H), 7.31 (dd,  $J = 13.5, 7.1$  Hz, 1H), 7.11 (dd,  $J = 17.9, 8.5$  Hz, 4H), 6.59 (d,  $J = 8.7$  Hz, 2H), 6.06 (d,  $J = 6.7$  Hz, 1H), 5.09 (d,  $J = 6.4$  Hz, 1H), 3.92 (s, 3H);  $^{13}\text{C-NMR}$  (151 MHz,  $\text{CDCl}_3$ )  $\delta$  163.8, 161.3, 160.6 (d,  $J = 248.1$  Hz), 144.5, 144.1, 133.4, 130.5, 130.5, 129.3, 128.4 (d,  $J = 3.2$  Hz), 125.0 (d,  $J = 3.5$  Hz), 123.7, 116.1, 116.0, 114.8, 52.3, 50.0, 50.0;  $^{19}\text{F-NMR}$  (564 MHz,  $\text{CDCl}_3$ )  $\delta$  -118.6; **HRMS (ESI)** calculated for  $\text{C}_{18}\text{H}_{14}^{35}\text{ClFN}_2\text{O}_3$   $[\text{M}+\text{Na}]^+$ : 383.0575, found: 383.0579; **HRMS (ESI)** calculated for  $\text{C}_{18}\text{H}_{14}^{37}\text{ClFN}_2\text{O}_3$   $[\text{M}+\text{Na}]^+$ : 385.0545, found: 385.0548; **Enantiomeric ratio**: 88.5:11.5, determined by HPLC (Daicel Chirapak IF, isopropanol/*n*-hexane = 30/70, flow rate = 1.0 mL/min,  $T = 30^\circ\text{C}$ ,  $\lambda = 254$  nm):  $t_{\text{R}} = 5.41$  min (minor),  $t_{\text{R}} = 6.21$  min (major).

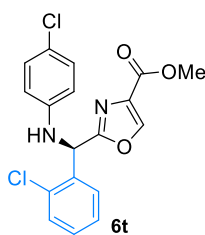

**Methyl (*R*)-2-((2-chlorophenyl)((4-chlorophenyl)amino)methyl)oxazole-4-carboxylate 6t:** yield: 15.0 mg (40%); (Flash column chromatography eluent, petroleum ether/diethyl ether = 1/1); yellow flocculent;  $[\alpha]_D^{20} = -12.3$  (c 0.18 CH<sub>2</sub>Cl<sub>2</sub>); **<sup>1</sup>H-NMR** (600 MHz, CDCl<sub>3</sub>)  $\delta$  8.16 (s, 1H), 7.50 – 7.40 (m, 2H), 7.27 (s, 1H), 7.26 – 7.20 (m, 1H), 7.09 (d,  $J = 8.7$  Hz, 2H), 6.55 (d,  $J = 8.7$  Hz, 2H), 6.21 (d,  $J = 6.3$  Hz, 1H), 5.14 (d,  $J = 6.0$  Hz, 1H), 3.92 (s, 3H); **<sup>13</sup>C-NMR** (151 MHz, CDCl<sub>3</sub>)  $\delta$  163.9, 161.3, 144.6, 144.1, 135.3, 133.8, 133.4, 130.2, 130.0, 129.3, 128.5, 127.7, 123.7, 114.8, 53.1, 52.3; **HRMS (ESI)** calculated for C<sub>18</sub>H<sub>14</sub><sup>35</sup>Cl<sub>2</sub>N<sub>2</sub>O<sub>3</sub> [M+Na]<sup>+</sup>: 399.0279, found: 399.0280; **HRMS (ESI)** calculated for C<sub>18</sub>H<sub>14</sub><sup>35</sup>Cl<sup>37</sup>ClN<sub>2</sub>O<sub>3</sub> [M+Na]<sup>+</sup>: 401.0250, found: 401.0257; **Enantiomeric ratio:** 91:9, determined by HPLC (Daicel Chirapak IF, isopropanol/*n*-hexane = 30/70, flow rate = 1.0 mL/min, T = 30 °C,  $\lambda$  = 254 nm):  $t_R$  = 5.37 min (minor),  $t_R$  = 5.88 min (major).

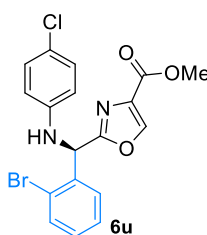

**Methyl (*R*)-2-((2-bromophenyl)((4-chlorophenyl)amino)methyl)oxazole-4-carboxylate 6u:** yield: 20.1 mg (48%); (Flash column chromatography eluent, petroleum ether/diethyl ether = 1/1); white solid;  $[\alpha]_D^{20} = -7.5$  (c 0.19 CH<sub>2</sub>Cl<sub>2</sub>); m.p.: 58.1-67.1 °C; **<sup>1</sup>H-NMR** (600 MHz, CDCl<sub>3</sub>)  $\delta$  8.17 (s, 1H), 7.62 (d,  $J = 8.0$  Hz, 1H), 7.45 (dd,  $J = 7.8, 1.4$  Hz, 1H), 7.28 (d,  $J = 7.3$  Hz, 1H), 7.21 – 7.15 (m, 1H), 7.09 (d,  $J = 8.8$  Hz, 2H), 6.55 (d,  $J = 8.8$  Hz, 2H), 6.18 (d,  $J = 6.1$  Hz, 1H), 5.16 (d,  $J = 6.0$  Hz, 1H), 3.92 (s, 3H); **<sup>13</sup>C-NMR** (151 MHz, CDCl<sub>3</sub>)  $\delta$  163.9, 161.3, 144.6, 144.1, 136.9, 133.5, 133.4, 130.2, 129.3, 128.7, 128.4, 124.0, 123.7, 114.8, 55.7, 52.3; **HRMS (ESI)** calculated for C<sub>18</sub>H<sub>14</sub><sup>79</sup>Br<sup>35</sup>ClN<sub>2</sub>O<sub>3</sub> [M+Na]<sup>+</sup>: 442.9774, found: 442.9777; **HRMS (ESI)** calculated for C<sub>18</sub>H<sub>14</sub><sup>81</sup>Br<sup>35</sup>ClN<sub>2</sub>O<sub>3</sub> [M+Na]<sup>+</sup>: 444.9754, found: 444.9755; **HRMS (ESI)** calculated for C<sub>18</sub>H<sub>14</sub><sup>81</sup>Br<sup>37</sup>ClN<sub>2</sub>O<sub>3</sub> [M+Na]<sup>+</sup>: 446.9724, found: 446.9727; **Enantiomeric ratio:** 90:10, determined by HPLC (Daicel Chirapak IF, isopropanol/*n*-hexane = 30/70, flow rate = 1.0 mL/min, T = 30 °C,  $\lambda$  = 254 nm):  $t_R$  = 5.48 min (minor),  $t_R$  = 5.90 min (major).

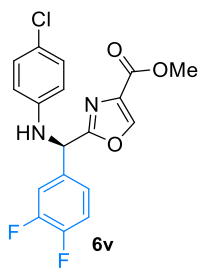

**Methyl (R)-2-(((4-chlorophenyl)amino)(3,4-difluorophenyl)methyl)oxazole-4-carboxylate 6v:** yield: 17.0 mg (45%); (Flash column chromatography eluent, petroleum ether/diethyl ether = 1/1); yellow oil;  $[\alpha]_D^{20} = -6.1$  (c 0.12 CH<sub>2</sub>Cl<sub>2</sub>); <sup>1</sup>H-NMR (600 MHz, CDCl<sub>3</sub>) δ 8.17 (s, 1H), 7.33 (t, *J* = 8.1 Hz, 1H), 7.23 (d, *J* = 8.2 Hz, 1H), 7.16 (dd, *J* = 17.7, 8.4 Hz, 1H), 7.10 (d, *J* = 8.8 Hz, 2H), 6.55 (d, *J* = 8.8 Hz, 2H), 5.66 (d, *J* = 5.8 Hz, 1H), 5.06 (d, *J* = 5.5 Hz, 1H), 3.92 (s, 3H); <sup>13</sup>C-NMR (151 MHz, CDCl<sub>3</sub>) δ 162.4 (d, *J* = 365.1 Hz), 151.6 (d, *J* = 13.1 Hz), 151.3 (d, *J* = 12.7 Hz), 150.0 (d, *J* = 12.9 Hz), 149.7 (d, *J* = 12.4 Hz), 144.6, 144.0, 134.6, 133.5, 129.3, 124.0, 123.2, 123.2, 123.2, 123.2, 118.1 (d, *J* = 17.6 Hz), 116.3 (d, *J* = 18.4 Hz), 114.9, 55.8, 52.4; <sup>19</sup>F-NMR (564 MHz, CDCl<sub>3</sub>) δ -135.5, -137.1; **HRMS (ESI)** calculated for C<sub>18</sub>H<sub>13</sub><sup>35</sup>ClF<sub>2</sub>N<sub>2</sub>O<sub>3</sub> [M+Na]<sup>+</sup>: 401.0480, found: 401.0485; **HRMS (ESI)** calculated for C<sub>18</sub>H<sub>13</sub><sup>37</sup>ClF<sub>2</sub>N<sub>2</sub>O<sub>3</sub> [M+Na]<sup>+</sup>: 403.0451, found: 403.0459; **Enantiomeric ratio:** 91:9, determined by HPLC (Daicel Chirapak IF, isopropanol/*n*-hexane = 30/70, flow rate = 1.0 mL/min, T = 30 °C, λ = 254 nm): t<sub>R</sub> = 5.53 min (minor), t<sub>R</sub> = 6.11 min (major).

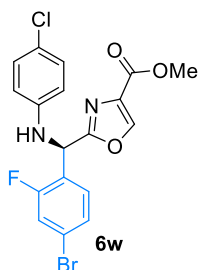

**Methyl (R)-2-(((4-bromo-2-fluorophenyl)((4-chlorophenyl)amino)methyl)oxazole-4-carboxylate 6w:** yield: 17.5 mg (40%); (Flash column chromatography eluent, petroleum ether/diethyl ether = 1/1); white flocculent;  $[\alpha]_D^{20} = -20.9$  (c 0.17 CH<sub>2</sub>Cl<sub>2</sub>); <sup>1</sup>H-NMR (600 MHz, CDCl<sub>3</sub>) δ 8.17 (s, 1H), 7.32 (dd, *J* = 8.5, 5.6 Hz, 2H), 7.27 (s, 1H), 7.10 (d, *J* = 8.7 Hz, 2H), 6.56 (d, *J* = 8.7 Hz, 2H), 5.99 (d, *J* = 6.6 Hz, 1H), 5.10 (d, *J* = 6.3 Hz, 1H), 3.92 (s, 3H); <sup>13</sup>C-NMR (151 MHz, CDCl<sub>3</sub>) δ 163.2, 161.2, 160.3 (d, *J* = 252.5 Hz), 144.6, 143.7, 133.5, 129.6 (d, *J* = 3.8 Hz), 129.4, 128.4 (d, *J* = 3.6 Hz), 124.2 (d, *J* = 13.5 Hz), 124.1, 124.1, 123.2, 123.1, 119.8, 119.7, 114.8, 52.4, 49.7, 49.7; <sup>19</sup>F-NMR (564 MHz, CDCl<sub>3</sub>) δ -115.9; **HRMS (ESI)** calculated for C<sub>18</sub>H<sub>13</sub><sup>79</sup>Br<sup>35</sup>ClFN<sub>2</sub>O<sub>3</sub> [M+Na]<sup>+</sup>: 460.9680, found: 460.9680; **HRMS (ESI)** calculated for C<sub>18</sub>H<sub>14</sub><sup>81</sup>Br<sup>35</sup>ClFN<sub>2</sub>O<sub>3</sub> [M+Na]<sup>+</sup>: 464.9630, found: 464.9637; **HRMS (ESI)** calculated for C<sub>18</sub>H<sub>14</sub><sup>81</sup>Br<sup>37</sup>ClFN<sub>2</sub>O<sub>3</sub> [M+Na]<sup>+</sup>: 446.9724, found: 446.9714; **Enantiomeric ratio:** 87:13, determined by HPLC (Daicel Chirapak IF, isopropanol/*n*-hexane = 30/70, flow rate = 1.0 mL/min, T = 30 °C, λ = 254 nm): t<sub>R</sub> = 5.54 min (minor), t<sub>R</sub> = 6.65 min (major).

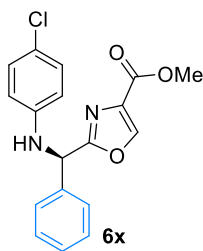

**Methyl (*R*)-2-(((4-chlorophenyl)amino)(phenyl)methyl)oxazole-4-carboxylate 6x:** yield: 18.8 mg (55%); (Flash column chromatography eluent, petroleum ether/diethyl ether = 1/1); white flocculent;  $[\alpha]_{\text{D}}^{20} = -17.9$  (c 0.17 CH<sub>2</sub>Cl<sub>2</sub>); <sup>1</sup>H-NMR (600 MHz, CDCl<sub>3</sub>) δ 8.16 (s, 1H), 7.47 (d, *J* = 7.3 Hz, 2H), 7.36 (t, *J* = 7.4 Hz, 2H), 7.33 (d, *J* = 7.2 Hz, 1H), 7.08 (d, *J* = 8.7 Hz, 2H), 6.57 (d, *J* = 8.7 Hz, 2H), 5.71 (d, *J* = 6.1 Hz, 1H), 4.99 (d, *J* = 5.9 Hz, 1H), 3.91 (s, 3H); <sup>13</sup>C-NMR (151 MHz, CDCl<sub>3</sub>) δ 164.5, 161.4, 144.5, 144.5, 137.6, 133.4, 129.2, 129.2, 128.8, 127.1, 123.5, 114.8, 56.7, 52.3; **HRMS (ESI)** calculated for C<sub>18</sub>H<sub>15</sub><sup>35</sup>ClN<sub>2</sub>O<sub>3</sub> [M+Na]<sup>+</sup>: 365.0669, found: 365.0665; **HRMS (ESI)** calculated for C<sub>18</sub>H<sub>15</sub><sup>37</sup>ClN<sub>2</sub>O<sub>3</sub> [M+Na]<sup>+</sup>: 367.0639, found: 367.0639; **Enantiomeric ratio:** 91:9, determined by HPLC (Daicel Chirapak IF, isopropanol/*n*-hexane = 30/70, flow rate = 1.0 mL/min, T = 30 °C, λ = 254 nm): t<sub>R</sub> = 6.32 min (minor), t<sub>R</sub> = 7.11 min (major).

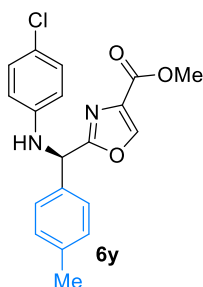

**Methyl (*R*)-2-(((4-chlorophenyl)amino)(p-tolyl)methyl)oxazole-4-carboxylate 6y:** yield: 18.2 mg (51%); (Flash column chromatography eluent, petroleum ether/diethyl ether = 1/1); white flocculent;  $[\alpha]_{\text{D}}^{20} = -25.4$  (c 0.13 CH<sub>2</sub>Cl<sub>2</sub>); <sup>1</sup>H-NMR (600 MHz, CDCl<sub>3</sub>) δ 8.15 (s, 1H), 7.35 (d, *J* = 8.0 Hz, 2H), 7.17 (d, *J* = 7.8 Hz, 2H), 7.08 (d, *J* = 8.8 Hz, 2H), 6.57 (d, *J* = 8.8 Hz, 2H), 5.67 (d, *J* = 6.1 Hz, 1H), 4.96 (d, *J* = 5.9 Hz, 1H), 3.91 (s, 3H), 2.33 (s, 3H); <sup>13</sup>C-NMR (151 MHz, CDCl<sub>3</sub>) δ 164.7, 161.4, 144.5, 144.4, 138.7, 134.6, 133.3, 129.9, 129.2, 127.0, 123.4, 114.8, 56.5, 52.3, 21.1; **HRMS (ESI)** calculated for C<sub>19</sub>H<sub>17</sub><sup>35</sup>ClN<sub>2</sub>O<sub>3</sub> [M+Na]<sup>+</sup>: 379.0825, found: 379.0823; **HRMS (ESI)** calculated for C<sub>19</sub>H<sub>17</sub><sup>37</sup>ClN<sub>2</sub>O<sub>3</sub> [M+Na]<sup>+</sup>: 381.0796, found: 381.0794; **Enantiomeric ratio:** 83.5:16.5, determined by HPLC (Daicel Chirapak IF, isopropanol/*n*-hexane = 30/70, flow rate = 1.0 mL/min, T = 30 °C, λ = 254 nm): t<sub>R</sub> = 6.29 min (minor), t<sub>R</sub> = 7.44 min (major).



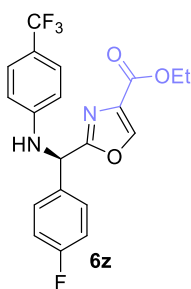

**Ethyl (R)-2-((4-fluorophenyl)((4-(trifluoromethyl)phenyl)amino)methyl)oxazole-4-carboxylate 6z:** yield: 28.2 mg (69%); (Flash column chromatography eluent, petroleum ether/diethyl ether = 1/1); white oil;  $[\alpha]_{\text{D}}^{20} = -12.1$  (c 0.14  $\text{CH}_2\text{Cl}_2$ );  $^1\text{H-NMR}$  (600 MHz,  $\text{CDCl}_3$ )  $\delta$  8.16 (s, 1H), 7.47 (dd,  $J = 8.3, 5.3$  Hz, 2H), 7.38 (d,  $J = 8.5$  Hz, 2H), 7.06 (t,  $J = 8.5$  Hz, 2H), 6.65 (d,  $J = 8.5$  Hz, 2H), 5.76 (d,  $J = 5.8$  Hz, 1H), 5.40 (d,  $J = 5.6$  Hz, 1H), 4.40 (q,  $J = 7.1$  Hz, 2H), 1.38 (t,  $J = 7.1$  Hz, 3H);  $^{13}\text{C-NMR}$  (151 MHz,  $\text{CDCl}_3$ )  $\delta$  163.8, 162.9 (d,  $J = 248.3$  Hz), 160.8, 148.2, 144.4, 133.7, 133.1 (d,  $J = 3.1$  Hz), 128.9 (d,  $J = 8.3$  Hz), 126.7 (q,  $J = 3.8$  Hz), 124.7 (q,  $J = 270.7$  Hz), 120.6 (d,  $J = 32.7$  Hz), 116.4, 116.2, 112.9, 61.5, 55.5, 14.3;  $^{19}\text{F-NMR}$  (564 MHz,  $\text{CDCl}_3$ )  $\delta$  -61.3, -112.6; **HRMS (ESI)** calculated for  $\text{C}_{20}\text{H}_{16}\text{F}_4\text{N}_2\text{O}_3$   $[\text{M}+\text{Na}]^+$ : 431.0995, found: 431.0990; **Enantiomeric ratio:** 90.5:9.5, determined by HPLC (Daicel Chirapak IF, isopropanol/*n*-hexane = 30/70, flow rate = 1.0 mL/min,  $T = 30^\circ\text{C}$ ,  $\lambda = 254$  nm):  $t_{\text{R}} = 7.72$  min (major),  $t_{\text{R}} = 9.67$  min (minor).

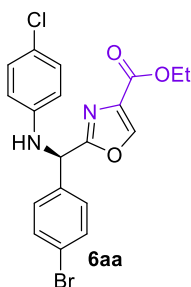

**Ethyl (R)-2-((4-bromophenyl)((4-chlorophenyl)amino)methyl)oxazole-4-carboxylate 6aa:** yield: 23.4 mg (54%); (Flash column chromatography eluent, petroleum ether/diethyl ether = 1/1); yellow oil;  $[\alpha]_{\text{D}}^{20} = -18.2$  (c 0.16  $\text{CH}_2\text{Cl}_2$ );  $^1\text{H-NMR}$  (600 MHz,  $\text{CDCl}_3$ )  $\delta$  8.14 (s, 1H), 7.49 (d,  $J = 8.4$  Hz, 2H), 7.36 (d,  $J = 8.3$  Hz, 2H), 7.09 (d,  $J = 8.7$  Hz, 2H), 6.55 (d,  $J = 8.7$  Hz, 2H), 5.66 (d,  $J = 6.0$  Hz, 1H), 5.05 (d,  $J = 5.8$  Hz, 1H), 4.39 (q,  $J = 7.1$  Hz, 2H), 1.37 (t,  $J = 7.1$  Hz, 3H);  $^{13}\text{C-NMR}$  (151 MHz,  $\text{CDCl}_3$ )  $\delta$  163.8, 160.9, 144.4, 144.2, 136.7, 133.7, 132.4, 129.3, 128.8, 123.8, 122.8, 114.9, 61.5, 56.2, 14.3; **HRMS (ESI)** calculated for  $\text{C}_{19}\text{H}_{16}^{79}\text{Br}^{35}\text{ClN}_2\text{O}_3$   $[\text{M}+\text{Na}]^+$ : 456.9931, found: 456.9932; **HRMS (ESI)** calculated for  $\text{C}_{19}\text{H}_{16}^{81}\text{Br}^{35}\text{ClN}_2\text{O}_3$   $[\text{M}+\text{Na}]^+$ : 458.9910, found: 458.9917; **HRMS (ESI)** calculated for  $\text{C}_{19}\text{H}_{16}^{81}\text{Br}^{37}\text{ClN}_2\text{O}_3$   $[\text{M}+\text{Na}]^+$ : 460.9881, found: 460.9884; **Enantiomeric ratio:** 90:10, determined by HPLC (Daicel Chirapak IF, isopropanol/*n*-hexane = 30/70, flow rate = 1.0 mL/min,  $T = 30^\circ\text{C}$ ,  $\lambda = 254$  nm):  $t_{\text{R}} = 5.83$  min (minor),  $t_{\text{R}} = 6.71$  min (major).

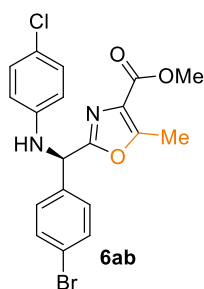

**Methyl (R)-2-((4-bromophenyl)((4-chlorophenyl)amino)methyl)-5-methyloxazole-4-carboxylate 6ab:** yield: 17.0 mg (39%); (Flash column chromatography eluent, petroleum ether/diethyl ether = 1/1); white oil;  $[\alpha]_D^{20} = -5.1$  (c 0.27 CH<sub>2</sub>Cl<sub>2</sub>); <sup>1</sup>H-NMR (600 MHz, CDCl<sub>3</sub>) δ 7.49 (d, *J* = 8.4 Hz, 2H), 7.36 (d, *J* = 8.4 Hz, 2H), 7.08 (d, *J* = 8.7 Hz, 2H), 6.55 (d, *J* = 8.8 Hz, 2H), 5.59 (d, *J* = 6.0 Hz, 1H), 4.99 (d, *J* = 5.8 Hz, 1H), 3.91 (s, 3H), 2.58 (s, 3H); <sup>13</sup>C-NMR (151 MHz, CDCl<sub>3</sub>) δ 162.4, 160.9, 157.2, 144.2, 137.0, 132.3, 129.2, 128.8, 127.6, 123.6, 122.7, 114.9, 56.0, 52.1, 12.1; **HRMS (ESI)** calculated for C<sub>19</sub>H<sub>16</sub><sup>79</sup>Br<sup>35</sup>ClN<sub>2</sub>O<sub>3</sub> [M+Na]<sup>+</sup>: 456.9931, found: 456.9933; **HRMS (ESI)** calculated for C<sub>19</sub>H<sub>16</sub><sup>81</sup>Br<sup>35</sup>ClN<sub>2</sub>O<sub>3</sub> [M+Na]<sup>+</sup>: 458.9910, found: 458.9915; **HRMS (ESI)** calculated for C<sub>19</sub>H<sub>16</sub><sup>81</sup>Br<sup>37</sup>ClN<sub>2</sub>O<sub>3</sub> [M+Na]<sup>+</sup>: 460.9881, found: 460.9888; **Enantiomeric ratio:** 84.5:15.5, determined by HPLC (Daicel Chirapak IF, isopropanol/*n*-hexane = 30/70, flow rate = 1.0 mL/min, T = 30 °C, λ = 254 nm): t<sub>R</sub> = 6.49 min (major), t<sub>R</sub> = 7.69 min (minor).

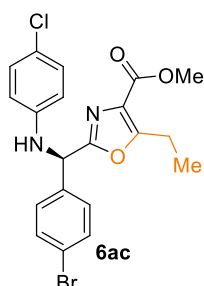

**Methyl (R)-2-((4-bromophenyl)((4-chlorophenyl)amino)methyl)-5-ethyloxazole-4-carboxylate 6ac:** yield: 12.1 mg (27%); (Flash column chromatography eluent, petroleum ether/diethyl ether = 1/1); yellow oil;  $[\alpha]_D^{20} = -6.8$  (c 0.12 CH<sub>2</sub>Cl<sub>2</sub>); <sup>1</sup>H-NMR (600 MHz, CDCl<sub>3</sub>) δ 7.49 (d, *J* = 8.3 Hz, 2H), 7.36 (d, *J* = 8.3 Hz, 2H), 7.08 (d, *J* = 8.6 Hz, 2H), 6.55 (d, *J* = 8.6 Hz, 2H), 5.60 (d, *J* = 5.9 Hz, 1H), 5.01 (d, *J* = 5.7 Hz, 1H), 3.91 (s, 3H), 3.09 – 2.92 (m, 2H), 1.22 (t, *J* = 7.5 Hz, 3H); <sup>13</sup>C-NMR (151 MHz, CDCl<sub>3</sub>) δ 162.4, 161.9, 160.8, 144.3, 137.0, 132.3, 129.2, 128.8, 126.7, 123.7, 122.7, 114.9, 56.1, 52.1, 19.7, 11.9; **HRMS (ESI)** calculated for C<sub>20</sub>H<sub>18</sub><sup>79</sup>Br<sup>35</sup>ClN<sub>2</sub>O<sub>3</sub> [M+Na]<sup>+</sup>: 471.0087, found: 471.0083; **HRMS (ESI)** calculated for C<sub>20</sub>H<sub>18</sub><sup>81</sup>Br<sup>35</sup>ClN<sub>2</sub>O<sub>3</sub> [M+Na]<sup>+</sup>: 473.0067, found: 473.0065; **HRMS (ESI)** calculated for C<sub>20</sub>H<sub>18</sub><sup>81</sup>Br<sup>37</sup>ClN<sub>2</sub>O<sub>3</sub> [M+Na]<sup>+</sup>: 475.0037, found: 475.0038; **Enantiomeric ratio:** 79:21, determined by HPLC (Daicel Chirapak IF, isopropanol/*n*-hexane = 30/70, flow rate = 1.0 mL/min, T = 30 °C, λ = 254 nm): t<sub>R</sub> = 9.69 min (minor), t<sub>R</sub> = 15.86 min (major).

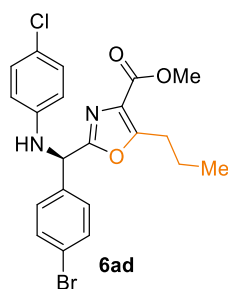

**Methyl (R)-2-((4-bromophenyl)((4-chlorophenyl)amino)methyl)-5-propyloxazole-4-carboxylate 6ad:** yield: 17.1 mg (37%); (Flash column chromatography eluent, petroleum ether/diethyl ether = 1/1); yellow oil;  $[\alpha]_D^{20} = 1.2$  (c 0.74 CH<sub>2</sub>Cl<sub>2</sub>);  $^1\text{H-NMR}$  (600 MHz, CDCl<sub>3</sub>)  $\delta$  7.49 (d,  $J = 8.2$  Hz, 2H), 7.35 (d,  $J = 8.2$  Hz, 2H), 7.08 (d,  $J = 8.6$  Hz, 2H), 6.55 (d,  $J = 8.5$  Hz, 2H), 5.60 (d,  $J = 6.0$  Hz, 1H), 4.99 (d,  $J = 5.9$  Hz, 1H), 3.91 (s, 3H), 2.96 (m,  $J = 31.4, 14.9, 7.4$  Hz, 2H), 1.65 (dd,  $J = 14.7, 7.4$  Hz, 2H), 0.90 (t,  $J = 7.4$  Hz, 3H);  $^{13}\text{C-NMR}$  (151 MHz, CDCl<sub>3</sub>)  $\delta$  162.4, 160.9, 160.9, 144.3, 137.0, 132.3, 129.2, 128.8, 127.3, 122.7, 114.9, 110.1, 56.1, 52.1, 27.8, 21.1, 13.5; **HRMS (ESI)** calculated for C<sub>21</sub>H<sub>20</sub><sup>79</sup>Br<sup>35</sup>ClN<sub>2</sub>O<sub>3</sub> [M+Na]<sup>+</sup>: 485.0244, found: 485.0243; **HRMS (ESI)** calculated for C<sub>21</sub>H<sub>20</sub><sup>81</sup>Br<sup>35</sup>ClN<sub>2</sub>O<sub>3</sub> [M+Na]<sup>+</sup>: 487.0223, found: 487.0225; **HRMS (ESI)** calculated for C<sub>21</sub>H<sub>20</sub><sup>81</sup>Br<sup>37</sup>ClN<sub>2</sub>O<sub>3</sub> [M+Na]<sup>+</sup>: 489.0194, found: 489.0198; **Enantiomeric ratio:** 86:14, determined by HPLC (Daicel Chirapak IF, isopropanol/*n*-hexane = 30/70, flow rate = 1.0 mL/min, T = 30 °C,  $\lambda$  = 254 nm):  $t_R$  = 5.60 min (minor),  $t_R$  = 9.76 min (major).

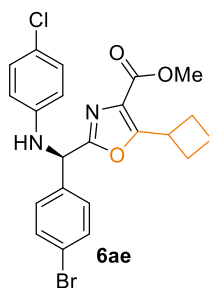

**Methyl (R)-2-((4-bromophenyl)((4-chlorophenyl)amino)methyl)-5-cyclobutyloxazole-4-carboxylate 6ae:** yield: 19.9 mg (42%); (Flash column chromatography eluent, petroleum ether/diethyl ether = 1/1); white oil;  $[\alpha]_D^{20} = 3.1$  (c 0.29 CH<sub>2</sub>Cl<sub>2</sub>);  $^1\text{H-NMR}$  (600 MHz, CDCl<sub>3</sub>)  $\delta$  7.50 (d,  $J = 8.3$  Hz, 1H), 7.39 (d,  $J = 8.3$  Hz, 1H), 7.09 (d,  $J = 8.5$  Hz, 1H), 6.56 (d,  $J = 8.6$  Hz, 1H), 5.63 (d,  $J = 6.0$  Hz, 1H), 5.03 (d,  $J = 5.8$  Hz, 1H), 4.23 – 4.15 (m, 1H), 3.90 (s, 3H), 2.30 (dt,  $J = 17.6, 8.2$  Hz, 3H), 2.23 – 2.17 (m, 1H), 2.04 (dd,  $J = 12.6, 6.2$  Hz, 1H), 1.94 – 1.88 (m, 1H);  $^{13}\text{C-NMR}$  (151 MHz, CDCl<sub>3</sub>)  $\delta$  160.7, 144.3, 137.1, 132.3, 129.3, 128.8, 125.9, 123.6, 122.7, 114.9, 56.1, 52.1, 31.1, 27.8, 27.6, 18.5; **HRMS (ESI)** calculated for C<sub>22</sub>H<sub>20</sub><sup>79</sup>Br<sup>35</sup>ClN<sub>2</sub>O<sub>3</sub> [M+Na]<sup>+</sup>: 497.0244, found: 497.0245; **HRMS (ESI)** calculated for C<sub>22</sub>H<sub>20</sub><sup>81</sup>Br<sup>35</sup>ClN<sub>2</sub>O<sub>3</sub> [M+Na]<sup>+</sup>: 499.0223, found: 499.0227; **HRMS (ESI)** calculated for C<sub>22</sub>H<sub>20</sub><sup>81</sup>Br<sup>37</sup>ClN<sub>2</sub>O<sub>3</sub> [M+Na]<sup>+</sup>: 501.0194, found: 501.0199; **Enantiomeric ratio:**

74.5:25.5, determined by HPLC (Daicel Chirapak IF, isopropanol/*n*-hexane = 30/70, flow rate = 1.0 mL/min, T = 30 °C,  $\lambda$  = 254 nm):  $t_R$  = 5.62 min (minor),  $t_R$  = 11.79 min (major).

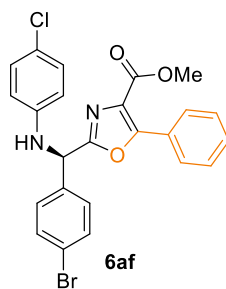

**Methyl (*R*)-2-((4-bromophenyl)((4-chlorophenyl)amino)methyl)-5-phenyloxazole-4-carboxylate 6af:** yield: 20.3 mg (41%); (Flash column chromatography eluent, petroleum ether/diethyl ether = 1/1); yellow oil;  $[\alpha]_D^{20}$  = 17.1 (c 0.43 CH<sub>2</sub>Cl<sub>2</sub>); <sup>1</sup>H-NMR (600 MHz, CDCl<sub>3</sub>)  $\delta$  7.94 (d, *J* = 2.8 Hz, 2H), 7.51 (d, *J* = 8.3 Hz, 2H), 7.46 (d, *J* = 2.9 Hz, 3H), 7.42 (d, *J* = 8.2 Hz, 2H), 7.11 (d, *J* = 8.5 Hz, 2H), 6.59 (d, *J* = 8.6 Hz, 2H), 5.71 (d, *J* = 5.9 Hz, 1H), 5.01 (d, *J* = 5.8 Hz, 1H), 3.94 (s, 3H); <sup>13</sup>C-NMR (151 MHz, CDCl<sub>3</sub>)  $\delta$  162.2, 161.1, 156.3, 144.2, 136.8, 132.4, 130.7, 129.3, 128.8, 128.5, 126.7, 126.5, 123.8, 122.8, 114.9, 56.1, 52.4; **HRMS (ESI)** calculated for C<sub>24</sub>H<sub>18</sub><sup>79</sup>Br<sup>35</sup>ClN<sub>2</sub>O<sub>3</sub> [M+Na]<sup>+</sup>: 519.0087, found: 519.0085; **HRMS (ESI)** calculated for C<sub>24</sub>H<sub>18</sub><sup>81</sup>Br<sup>35</sup>ClN<sub>2</sub>O<sub>3</sub> [M+Na]<sup>+</sup>: 521.0067, found: 521.0067; **HRMS (ESI)** calculated for C<sub>24</sub>H<sub>18</sub><sup>81</sup>Br<sup>37</sup>ClN<sub>2</sub>O<sub>3</sub> [M+Na]<sup>+</sup>: 523.0037, found: 523.0039; **Enantiomeric ratio:** 83.5:16.5, determined by HPLC (Daicel Chirapak IF, isopropanol/*n*-hexane = 30/70, flow rate = 1.0 mL/min, T = 30 °C,  $\lambda$  = 254 nm):  $t_R$  = 6.37 min (minor),  $t_R$  = 15.66 min (major).

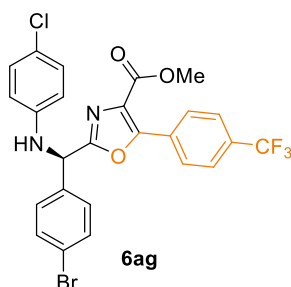

**Methyl (*R*)-2-((4-bromophenyl)((4-chlorophenyl)amino)methyl)-5-(4-(trifluoromethyl)phenyl)oxazole-4-carboxylate 6ag:** yield: 25.4 mg (45%); (Flash column chromatography eluent, petroleum ether/diethyl ether = 1/1); yellow oil;  $[\alpha]_D^{20}$  = 13.7 (c 0.31 CH<sub>2</sub>Cl<sub>2</sub>); <sup>1</sup>H-NMR (600 MHz, CDCl<sub>3</sub>)  $\delta$  8.10 (d, *J* = 8.1 Hz, 2H), 7.71 (d, *J* = 8.2 Hz, 2H), 7.53 (d, *J* = 8.3 Hz, 2H), 7.42 (d, *J* = 8.3 Hz, 2H), 7.11 (d, *J* = 8.6 Hz, 2H), 6.59 (d, *J* = 8.6 Hz, 2H), 5.73 (d, *J* = 5.9 Hz, 1H), 4.98 (d, *J* = 5.8 Hz, 1H), 3.96 (s, 3H); <sup>13</sup>C-NMR (151 MHz, CDCl<sub>3</sub>)  $\delta$  162.0, 161.9, 154.5, 144.1, 136.6, 132.5, 132.3 (q, *J* = 32.8 Hz), 131.8, 129.8, 129.4, 129.0 (q, *J* = 269.2 Hz), 128.8, 128.8, 125.5 (q, *J* = 3.5 Hz), 124.0, 123.0, 115.0, 56.2, 52.6; <sup>19</sup>F-NMR (564 MHz, CDCl<sub>3</sub>)  $\delta$  -63.1; **HRMS (ESI)** calculated for C<sub>25</sub>H<sub>17</sub><sup>79</sup>Br<sup>35</sup>ClF<sub>3</sub>N<sub>2</sub>O<sub>3</sub> [M+Na]<sup>+</sup>: 586.9961, found: 586.9965; **HRMS (ESI)** calculated for

$C_{25}H_{17}^{81}Br^{35}ClF_3N_2O_3$   $[M+Na]^+$ : 588.9940, found: 588.9947; **HRMS (ESI)** calculated for  $C_{25}H_{17}^{81}Br^{37}ClF_3N_2O_3$   $[M+Na]^+$ : 590.9911, found: 590.9919; **Enantiomeric ratio**: 76:24, determined by HPLC (Daicel Chirapak IF, isopropanol/*n*-hexane = 30/70, flow rate = 1.0 mL/min, T = 30 °C,  $\lambda$  = 254 nm):  $t_R$  = 5.77 min (minor),  $t_R$  = 10.69 min (major).

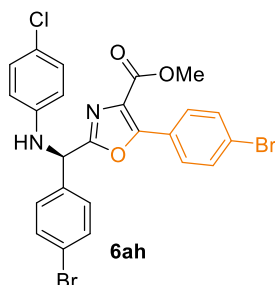

**Methyl (*R*)-5-(4-bromophenyl)-2-((4-chlorophenyl)amino)methyl)oxazole-4-carboxylate 6ah**: yield: 17.2 mg (30%); (Flash column chromatography eluent, petroleum ether/diethyl ether = 1/1); white oil;  $[\alpha]_D^{20}$  = 15.5 (c 0.14  $CH_2Cl_2$ );  **$^1H$ -NMR** (600 MHz,  $CDCl_3$ )  $\delta$  7.85 (d,  $J$  = 8.5 Hz, 2H), 7.59 (d,  $J$  = 8.5 Hz, 2H), 7.51 (d,  $J$  = 8.3 Hz, 2H), 7.41 (d,  $J$  = 8.3 Hz, 2H), 7.11 (d,  $J$  = 8.7 Hz, 2H), 6.58 (d,  $J$  = 8.7 Hz, 2H), 5.71 (d,  $J$  = 5.8 Hz, 1H), 4.97 (d,  $J$  = 5.7 Hz, 1H), 3.94 (s, 3H);  **$^{13}C$ -NMR** (151 MHz,  $CDCl_3$ )  $\delta$  162.1, 161.3, 155.2, 144.2, 136.7, 132.5, 131.8, 129.9, 129.3, 128.8, 127.2, 125.4, 125.3, 123.9, 122.9, 114.9, 56.2, 52.5; **HRMS (ESI)** calculated for  $C_{24}H_{17}^{79}Br^{35}ClN_2O_3$   $[M+Na]^+$ : 596.9192, found: 596.9185; **HRMS (ESI)** calculated for  $C_{24}H_{17}^{81}Br^{37}ClN_2O_3$   $[M+Na]^+$ : 602.9122, found: 602.9114; **Enantiomeric ratio**: 71:29, determined by HPLC (Daicel Chirapak IA, isopropanol/*n*-hexane = 30/70, flow rate = 1.0 mL/min, T = 30 °C,  $\lambda$  = 254 nm):  $t_R$  = 7.04 min (minor),  $t_R$  = 15.96 min (major).

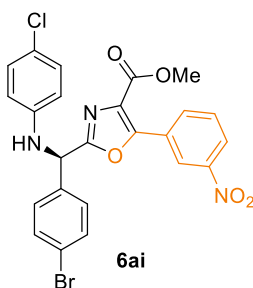

**Methyl (*R*)-2-((4-bromophenyl)((4-chlorophenyl)amino)methyl)-5-(3-nitrophenyl)oxazole-4-carboxylate 6ai**: yield: 24.3 mg (45%); (Flash column chromatography eluent, petroleum ether/diethyl ether = 1/1); yellow oil;  $[\alpha]_D^{20}$  = 16.5 (c 0.45  $CH_2Cl_2$ );  **$^1H$ -NMR** (600 MHz,  $CDCl_3$ )  $\delta$  8.89 (s, 1H), 8.37 (d,  $J$  = 7.9 Hz, 1H), 8.32 – 8.26 (m, 1H), 7.65 (t,  $J$  = 8.1 Hz, 1H), 7.53 (d,  $J$  = 8.4 Hz, 2H), 7.43 (d,  $J$  = 8.4 Hz, 2H), 7.12 (d,  $J$  = 8.7 Hz, 2H), 6.61 (d,  $J$  = 8.7 Hz, 2H), 5.76 (d,  $J$  = 6.1 Hz, 1H), 4.97 (d,  $J$  = 6.1 Hz, 1H), 3.98 (s, 3H);  **$^{13}C$ -NMR** (151 MHz,  $CDCl_3$ )  $\delta$  162.1, 161.8, 153.4, 148.3, 144.0, 136.4, 134.0, 132.5, 129.7, 129.3, 128.8, 128.4, 128.0, 125.0, 124.0, 123.4, 123.1, 114.9, 56.2, 52.8; **HRMS (ESI)** calculated for  $C_{24}H_{17}^{79}Br^{35}ClN_3O_5$   $[M+Na]^+$ : 563.9938, found: 563.9935; **HRMS (ESI)**

calculated for  $C_{24}H_{17}^{81}Br^{37}ClN_3O_5$   $[M+Na]^+$ : 567.9888, found: 567.9889; **Enantiomeric ratio**: 79:21, determined by HPLC (Daicel Chirapak IF, isopropanol/*n*-hexane = 30/70, flow rate = 1.0 mL/min,  $T = 30^\circ C$ ,  $\lambda = 254$  nm):  $t_R = 9.37$  min (minor),  $t_R = 16.54$  min (major).

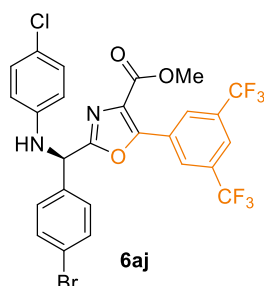

**Methyl (R)-5-(3,5-bis(trifluoromethyl)phenyl)-2-((4-bromophenyl)((4-chlorophenyl)amino)methyl)oxazole-4-carboxylate 6aj**: yield: 28.4 mg (45%); (Flash column chromatography eluent, petroleum ether/diethyl ether = 1/1); white oil;  $[\alpha]_D^{20} = 15.7$  (c 0.74  $CH_2Cl_2$ );  $^1H$ -NMR (600 MHz,  $CDCl_3$ )  $\delta$  8.49 (s, 2H), 7.95 (s, 1H), 7.53 (d,  $J = 8.4$  Hz, 2H), 7.42 (d,  $J = 8.4$  Hz, 2H), 7.12 (d,  $J = 8.8$  Hz, 2H), 6.61 (d,  $J = 8.8$  Hz, 2H), 5.77 (d,  $J = 6.4$  Hz, 1H), 4.95 (d,  $J = 6.3$  Hz, 1H), 3.98 (s, 3H);  $^{13}C$ -NMR (151 MHz,  $CDCl_3$ )  $\delta$  162.5, 161.6, 152.7, 144.0, 136.3, 132.6, 132.0 (q,  $J = 33.8$  Hz), 129.4, 129.0, 128.8, 128.6 – 128.4 (m), 124.1, 123.8 (q,  $J = 3.6$  Hz), 123.2, 121.2 (q,  $J = 272.9$  Hz), 115.0, 56.2, 52.9;  $^{19}F$ -NMR (564 MHz,  $CDCl_3$ )  $\delta$  -63.0; **HRMS (ESI)** calculated for  $C_{26}H_{16}^{79}Br^{35}ClF_6N_2O_3$   $[M+Na]^+$ : 654.9835, found: 654.9835; **HRMS (ESI)** calculated for  $C_{26}H_{16}^{81}Br^{37}ClF_6N_2O_3$   $[M+Na]^+$ : 658.9785, found: 658.9789; **Enantiomeric ratio**: 80:20, determined by HPLC (Daicel Chirapak IF, isopropanol/*n*-hexane = 30/70, flow rate = 1.0 mL/min,  $T = 30^\circ C$ ,  $\lambda = 254$  nm):  $t_R = 5.25$  min (minor),  $t_R = 5.86$  min (major).

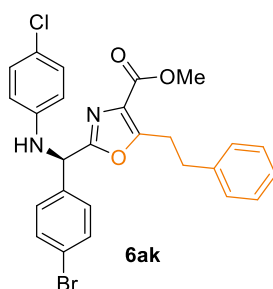

**Methyl (R)-2-((4-bromophenyl)((4-chlorophenyl)amino)methyl)-5-phenethyloxazole-4-carboxylate 6ak**: yield: 21.5 mg (41%); (Flash column chromatography eluent, petroleum ether/diethyl ether = 1/1); white oil;  $[\alpha]_D^{20} = -2.9$  (c 0.44  $CH_2Cl_2$ );  $^1H$ -NMR (600 MHz,  $CDCl_3$ )  $\delta$  7.48 (d,  $J = 8.4$  Hz, 2H), 7.30 – 7.24 (m, 3H), 7.19 (d,  $J = 6.5$  Hz, 2H), 7.09 (d,  $J = 8.8$  Hz, 2H), 7.04 – 6.96 (m, 2H), 6.53 (d,  $J = 8.8$  Hz, 2H), 5.56 (d,  $J = 6.2$  Hz, 1H), 4.89 (d,  $J = 6.1$  Hz, 1H), 3.88 (s, 3H), 3.31 (t,  $J = 7.5$  Hz, 2H), 2.93 (t,  $J = 7.5$  Hz, 2H);  $^{13}C$ -NMR (151 MHz,  $CDCl_3$ )  $\delta$  162.2, 161.0, 159.8, 144.2, 139.6, 136.9, 132.3, 129.2, 128.7, 128.5, 128.3, 127.6, 126.5, 123.6, 122.7, 114.8, 56.0, 52.1, 33.7, 27.8; **HRMS (ESI)** calculated for  $C_{26}H_{22}^{79}Br^{35}ClN_2O_3$   $[M+Na]^+$ : 547.0400, found: 547.0405; **HRMS**

**(ESI)** calculated for  $\text{C}_{26}\text{H}_{22}^{81}\text{Br}^{37}\text{ClN}_2\text{O}_3$   $[\text{M}+\text{Na}]^+$ : 551.0350, found: 551.0359; **Enantiomeric ratio:** 79.5:20.5, determined by HPLC (Daicel Chirapak IF, isopropanol/*n*-hexane = 30/70, flow rate = 1.0 mL/min, T = 30 °C,  $\lambda$  = 254 nm):  $t_{\text{R}}$  = 6.68 min (minor),  $t_{\text{R}}$  = 10.08 min (major).

### 3. Asymmetric Ugi-4CR/Wittig reaction sequences in large-scale

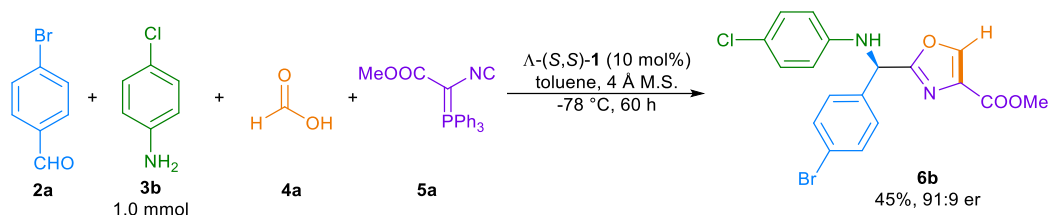

A 50-mL oven-dried tube was charged with 4-bromobenzaldehyde **2a** (1.2 mmol), 4-chloroaniline **3b** (1.0 mmol), catalyst  $\Delta$ -(S,S)-**1a** (0.1 mmol), 4 Å MS (100.0 mg), and toluene (10.0 mL) at room temperature and stirred for 30 min. Then isocyano(triphenylphosphoranylidene)-acetates **5a** (3.0 mmol) was added. The mixture was cooled to  $-78\text{ }^{\circ}\text{C}$  and stirred for another 30 min. The formic acid **4a** (15.0 mmol) was divided into 5.0 mmol parts added at 12 hours intervals was stirred vigorously for 60 h. The reaction was then quenched with pre-cooled  $\text{NEt}_3$  ( $-78\text{ }^{\circ}\text{C}$ , 1.0 mL). The organic layer was separated, and the aqueous phase was extracted with EtOAc ( $3 \times 30\text{ mL}$ ). The combined organic layers were washed with water (50 mL) and brine (50 mL). The solution was then dried over  $\text{Na}_2\text{SO}_4$  and filtered. The volatiles were then evaporated under reduced pressure and the residue was purified by flash column chromatography (silica gel, petroleum ether/ ethyl acetate = 1:1) to give the desired product **6b** (189.0 mg, 45% yield, 91:9 er).



## 4. Nonlinear Effect Studies

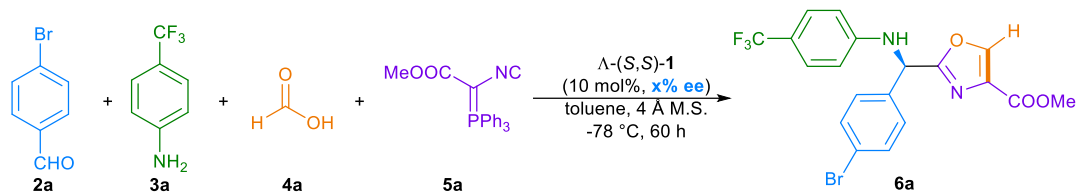

A 10-mL oven-dried tube was charged with 4-bromobenzaldehyde **2b** (0.12 mmol), 4-trifluoroaniline **3a** (0.10 mmol), scalemic catalyst **1a** (0.01 mmol), 4 Å MS (50 mg), and toluene (1.5 mL) at room temperature and stirred for 30 min. Then isocyano(triphenylphosphoranylidene)-acetates **5a** (1.50 mmol) was added in one portion. The mixture was cooled to  $-78\text{ }^{\circ}\text{C}$  and stirred for another 30 min. The formic acid **4a** (0.30 mmol) was divided into three equal parts added at 12 hours intervals and the resulting solution was stirred vigorously for 60 h. The reaction was then quenched with pre-cooled  $\text{NEt}_3$  ( $-78\text{ }^{\circ}\text{C}$ , 1.0 mmol). The mixture was purified by flash column chromatography (silica gel, petroleum ether/diethyl ether = 1:1) to give the multisubstituted oxazoles **6a**.

**Table S3.** Relation between *e.e.* of [**1a**] and *e.e.* of [**6a**]

| entry | $\Delta$ - <b>1a</b><br>(mg) | $\Lambda$ - <b>1a</b><br>(mg) | <i>ee</i> <sub>1</sub> of<br><b>1a</b> (%) <sup>b</sup> | c (g/100 mL) <sup>c</sup> | $[\alpha]^{20}$ | yield of<br><b>6a</b> (%) <sup>e</sup> | <i>ee</i> <sub>2</sub> of<br><b>6a</b> (%) <sup>f</sup> |
|-------|------------------------------|-------------------------------|---------------------------------------------------------|---------------------------|-----------------|----------------------------------------|---------------------------------------------------------|
| 1     | --                           | 2.1                           | 100                                                     | 0.0084                    | -3785.71        | 60                                     | 79                                                      |
| 2     | 2.5                          | 47.5                          | 86                                                      | 0.0084                    | -3198.41        | 50                                     | 67                                                      |
| 3     | 5.5                          | 45.0                          | 77                                                      | 0.0084                    | -2873.02        | 53                                     | 58                                                      |
| 4     | 7.5                          | 42.5                          | 73                                                      | 0.0084                    | -2730.16        | 55                                     | 51                                                      |
| 5     | 10.0                         | 40.0                          | 58                                                      | 0.008                     | -2170.83        | 51                                     | 43                                                      |
| 6     | 15.0                         | 35.0                          | 38                                                      | 0.008                     | -1420.83        | 55                                     | 28                                                      |
| 7     | 20.0                         | 30.5                          | 18                                                      | 0.008                     | -675.00         | 55                                     | 13                                                      |
| 8     | 2.0                          | --                            | --                                                      | 0.008                     | +3662.50        | 56                                     | -79                                                     |

<sup>a</sup> The scalemic catalyst **1a** was prepared by mixing the two enantiopure catalysts  $\Delta$ -(*R,R*)-**1a** and  $\Lambda$ -(*S,S*)-**1a**, which were completely dissolved in MeOH and then the solvent was evaporated in vacuo before used. <sup>b</sup> The *ee*<sub>1</sub> of **1a** were calculated by the quality of  $\Delta$ -(*R,R*)-**1a** and  $\Lambda$ -(*S,S*)-**1a**. <sup>c</sup> The samples were dissolved in MeOH. <sup>d</sup> The *ee*<sub>2</sub> of **1a** were calculated according to the optical rotation values of different scalemic catalysts **1a** divided by the average optical rotation values of  $\Delta$ -(*R,R*)-**1a** and  $\Lambda$ -(*S,S*)-**1a**. The *ee*<sub>2</sub> values were used as the horizontal coordinate in **Table S1**. <sup>e</sup> Isolated yield. <sup>f</sup> Determined by HPLC analysis.

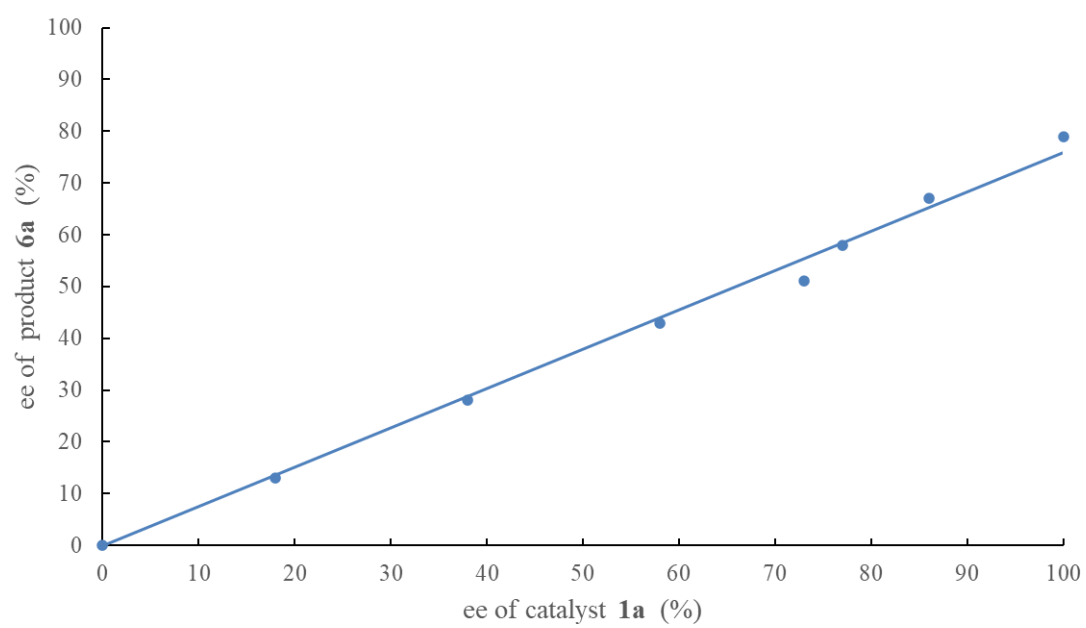

**Figure S1.** Nonlinear effect studies with catalyst **1a**.

## 5. X-ray single crystal data for 6u

**Sample preparation for crystal growth:** Compound **6u** (60.0 mg) was dissolved in *n*-hexane/DCM/diethyl ether (v/v = 3/1/1, 5.0 mL), while slow evaporation of solvent at room temperature white crystals were grown. Thermal ellipsoids are shown at 50% probability.

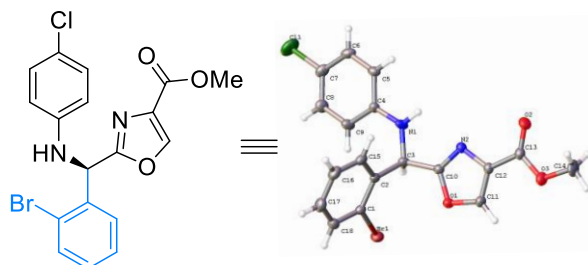

**Table S4.** Crystal data and structure refinement for **6u** (CCDC 2422261)

|                                             |                                                                   |
|---------------------------------------------|-------------------------------------------------------------------|
| Empirical formula                           | C <sub>18</sub> H <sub>14</sub> BrClN <sub>2</sub> O <sub>3</sub> |
| Formula weight                              | 421.67                                                            |
| Temperature/K                               | 213.0                                                             |
| Crystal system                              | monoclinic                                                        |
| Space group                                 | P2 <sub>1</sub>                                                   |
| a/Å                                         | 11.1043(3)                                                        |
| b/Å                                         | 13.4026(4)                                                        |
| c/Å                                         | 12.0631(4)                                                        |
| α/°                                         | 90                                                                |
| β/°                                         | 90.368(2)                                                         |
| γ/°                                         | 90                                                                |
| Volume/Å <sup>3</sup>                       | 1795.27(9)                                                        |
| Z                                           | 4                                                                 |
| ρ <sub>calc</sub> /cm <sup>3</sup>          | 1.506                                                             |
| μ/mm <sup>-1</sup>                          | 3.083                                                             |
| F(000)                                      | 848.0                                                             |
| Crystal size/mm <sup>3</sup>                | 0.07 × 0.07 × 0.05                                                |
| Radiation                                   | GaKα (λ = 1.34139)                                                |
| 2θ range for data collection/°              | 3.463 to 55.120                                                   |
| Index ranges                                | -13 ≤ h ≤ 13, -16 ≤ k ≤ 16, -12 ≤ l ≤ 14                          |
| Reflections collected                       | 24195                                                             |
| Independent reflections                     | 6784 [R <sub>int</sub> = 0.0458, R <sub>sigma</sub> = 0.0408]     |
| Data/restraints/parameters                  | 6784/1/453                                                        |
| Goodness-of-fit on F <sup>2</sup>           | 1.065                                                             |
| Final R indexes [I > 2σ (I)]                | R <sub>1</sub> = 0.0258, wR <sub>2</sub> = 0.0625                 |
| Final R indexes [all data]                  | R <sub>1</sub> = 0.0274, wR <sub>2</sub> = 0.0638                 |
| Largest diff. peak/hole / e Å <sup>-3</sup> | 0.278/-0.356                                                      |
| Flack parameter                             | 0.041(7)                                                          |

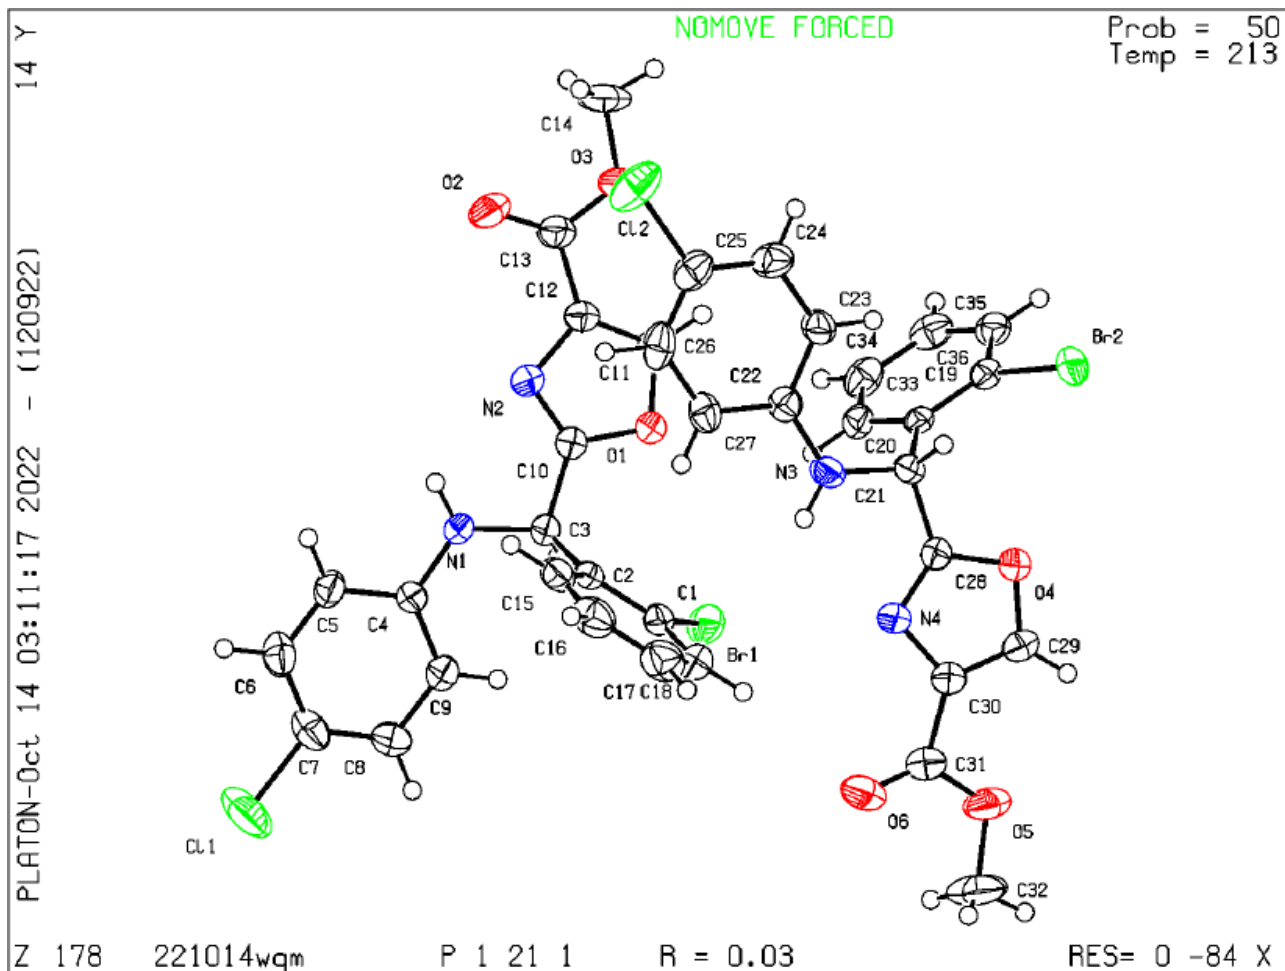

## 6. NMR spectra and HPLC traces

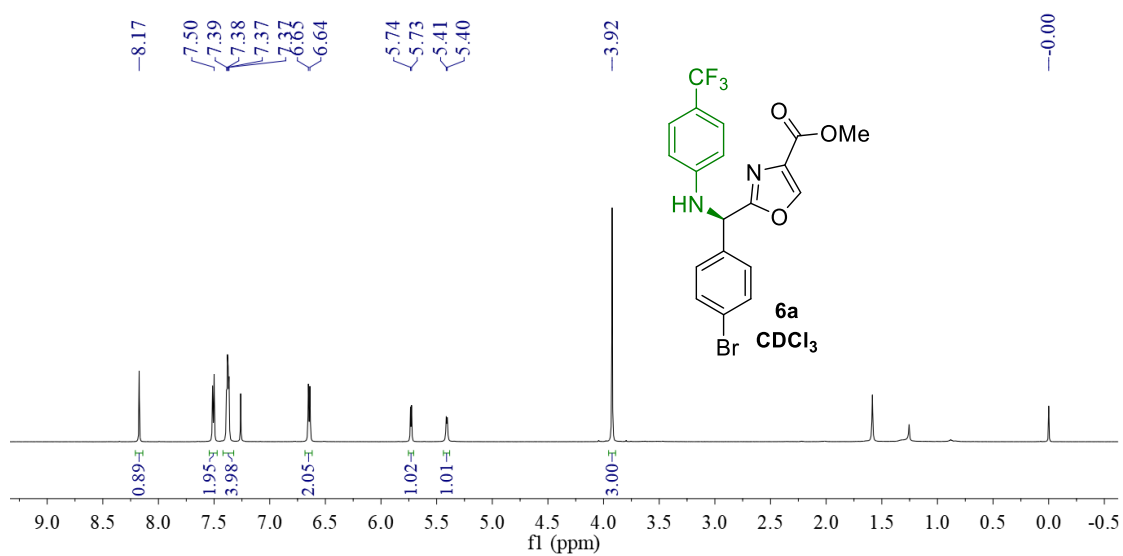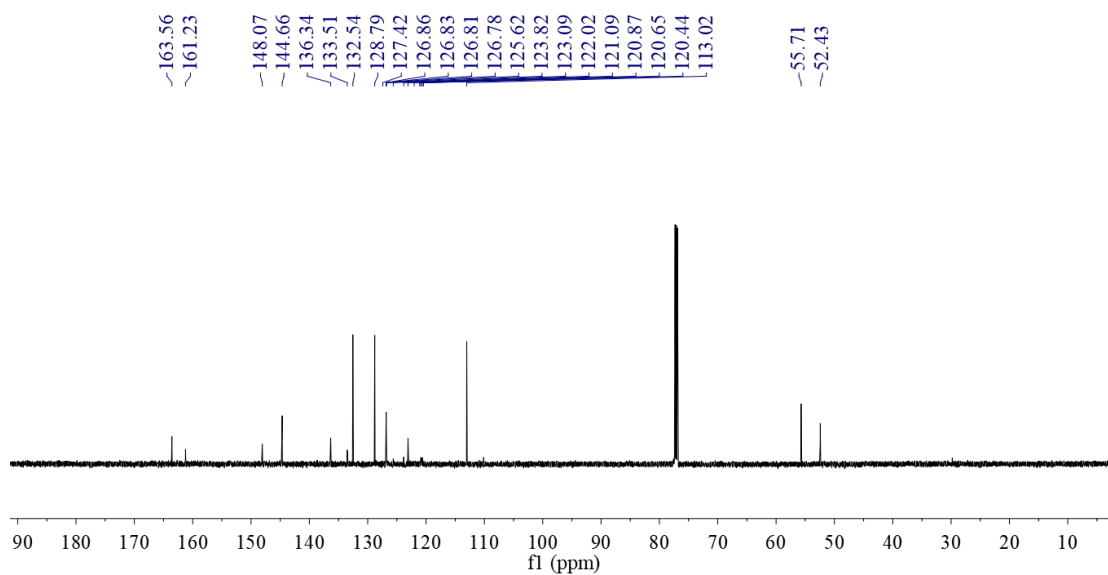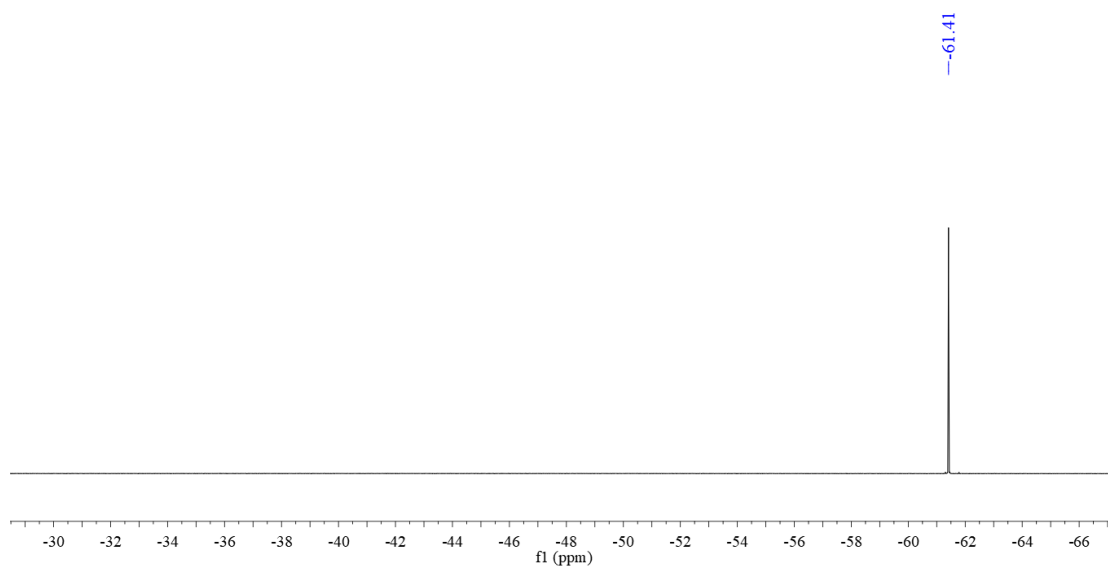

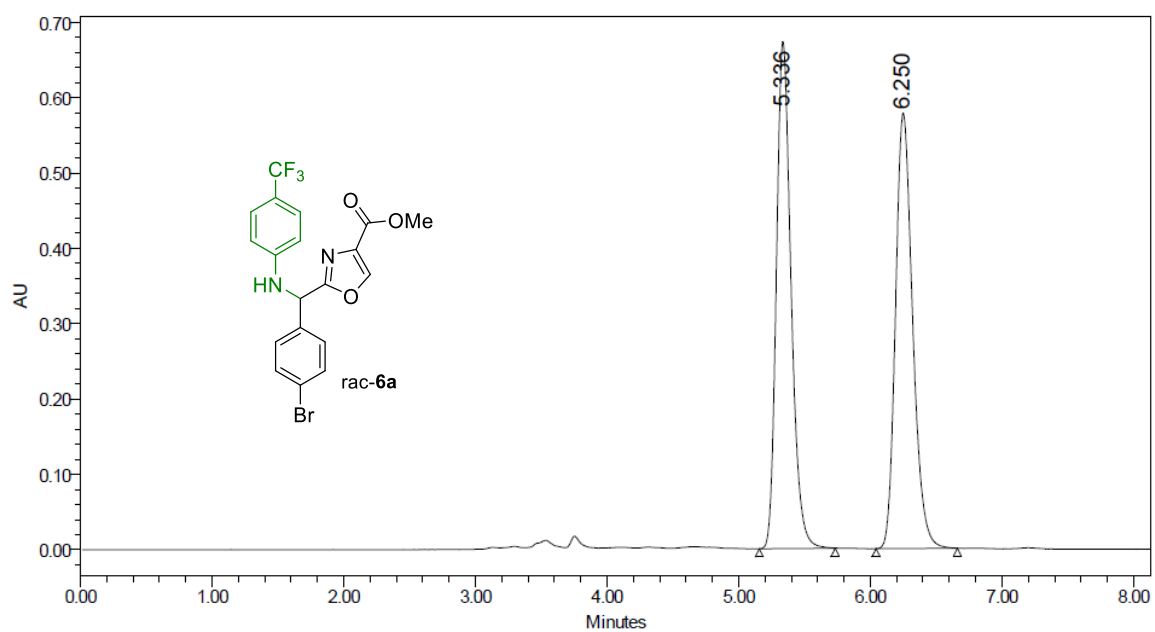

|   | RT<br>(min) | Peak<br>Type | Area<br>( $\mu\text{V}\cdot\text{sec}$ ) | % Area | Height<br>( $\mu\text{V}$ ) | % Height | Integration<br>Type | Points<br>Across Peak | Start<br>Time<br>(min) | End<br>Time<br>(min) |
|---|-------------|--------------|------------------------------------------|--------|-----------------------------|----------|---------------------|-----------------------|------------------------|----------------------|
| 1 | 5.336       | Unknown      | 5208342                                  | 49.93  | 673305                      | 53.82    | BB                  | 346                   | 5.157                  | 5.733                |
| 2 | 6.250       | Unknown      | 5223962                                  | 50.07  | 577789                      | 46.18    | BB                  | 371                   | 6.043                  | 6.662                |

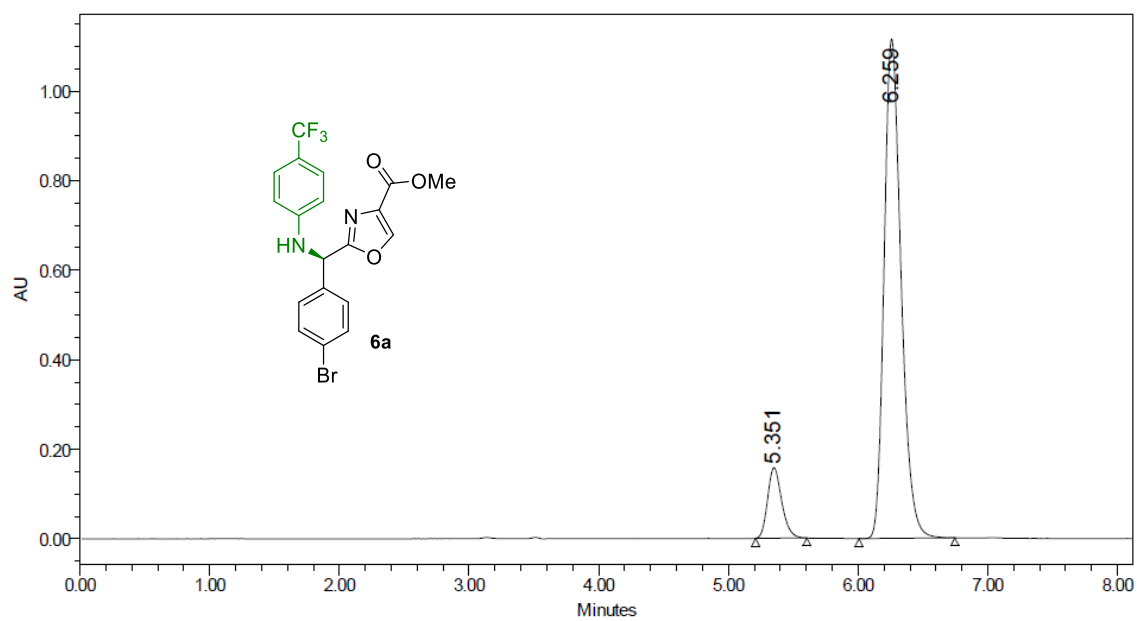

|   | RT<br>(min) | Peak<br>Type | Area<br>( $\mu\text{V}\cdot\text{sec}$ ) | % Area | Height<br>( $\mu\text{V}$ ) | % Height | Integration<br>Type | Points<br>Across Peak | Start<br>Time<br>(min) | End<br>Time<br>(min) |
|---|-------------|--------------|------------------------------------------|--------|-----------------------------|----------|---------------------|-----------------------|------------------------|----------------------|
| 1 | 5.351       | Unknown      | 1190854                                  | 10.51  | 157429                      | 12.37    | bb                  | 237                   | 5.210                  | 5.605                |
| 2 | 6.259       | Unknown      | 10134669                                 | 89.49  | 1115100                     | 87.63    | bB                  | 443                   | 6.007                  | 6.745                |

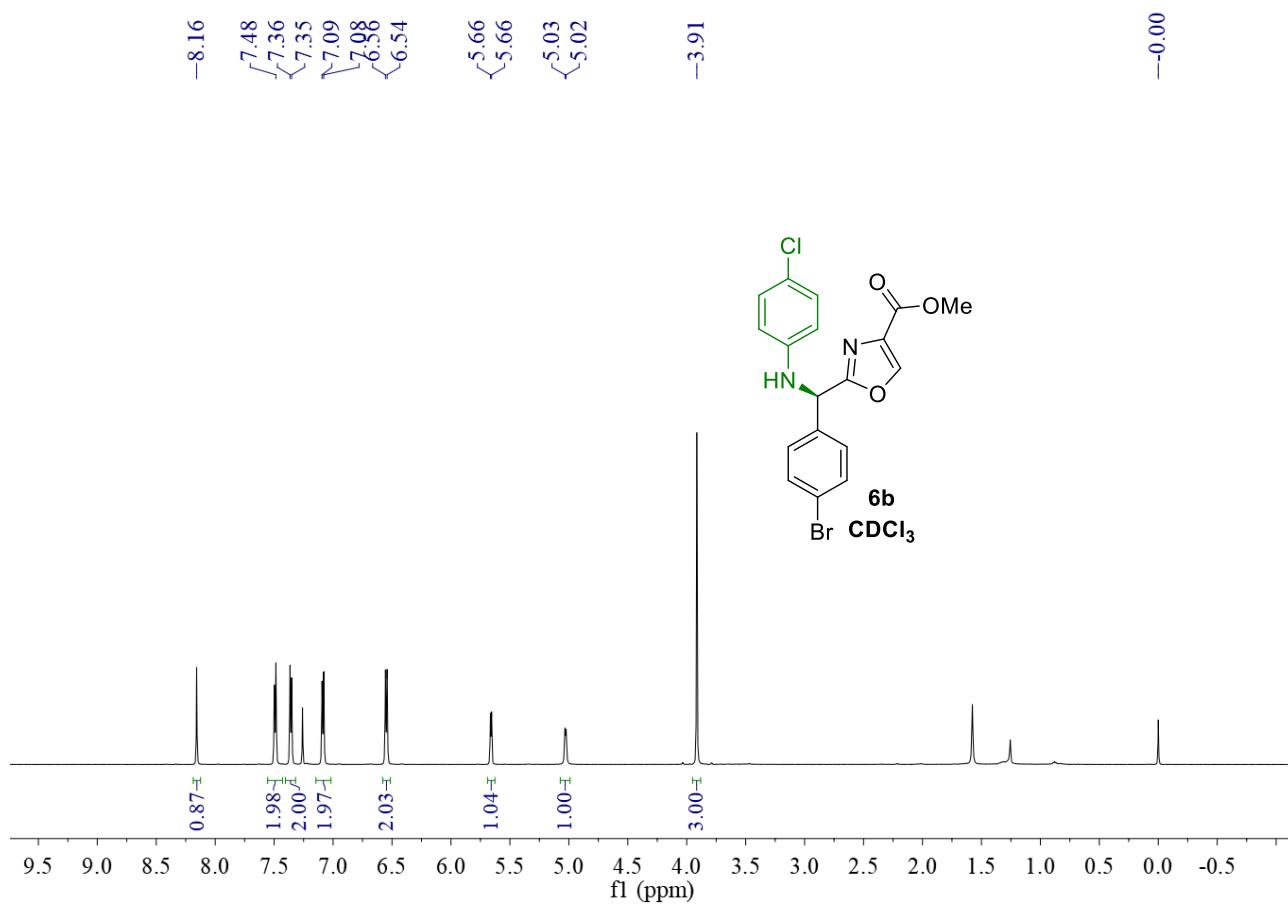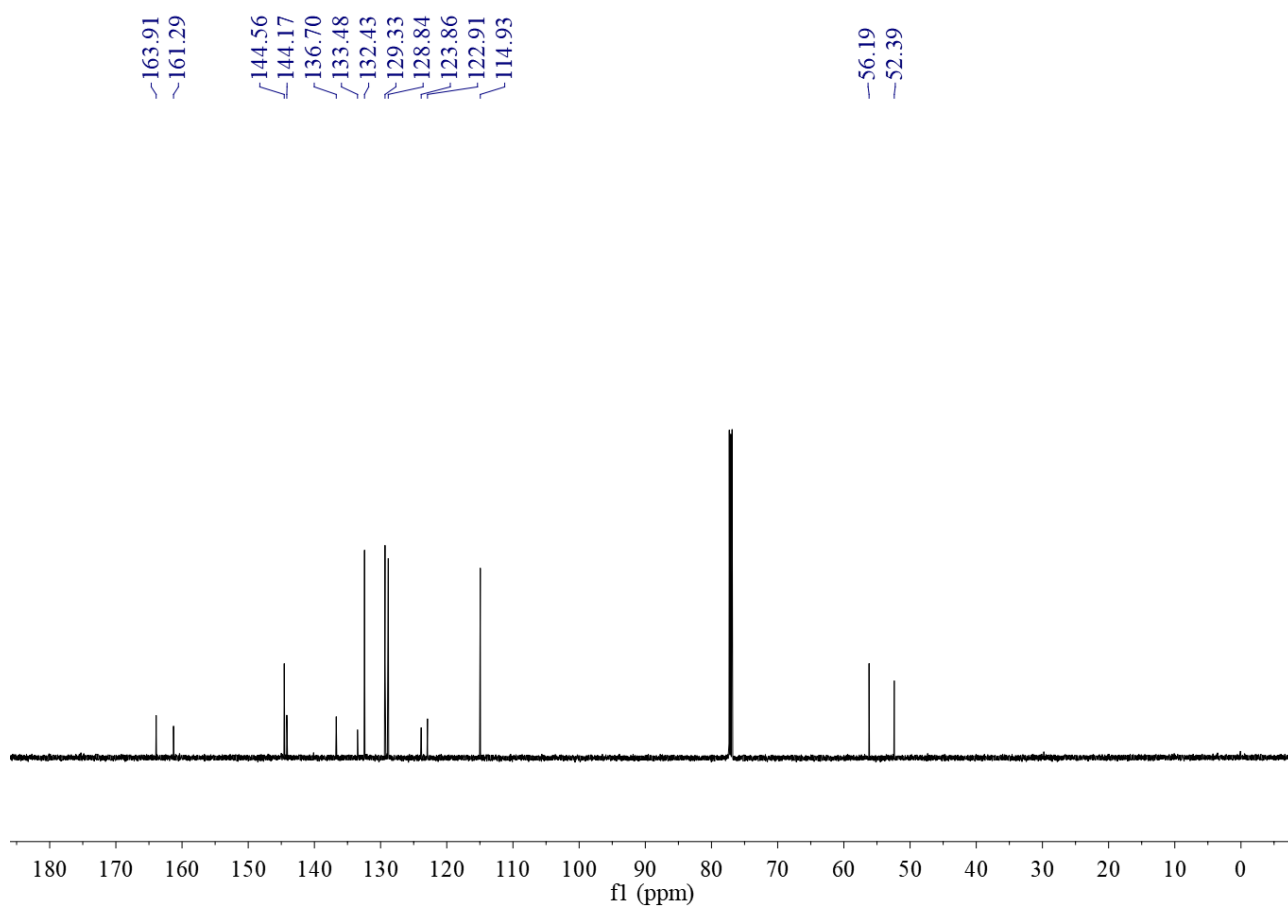

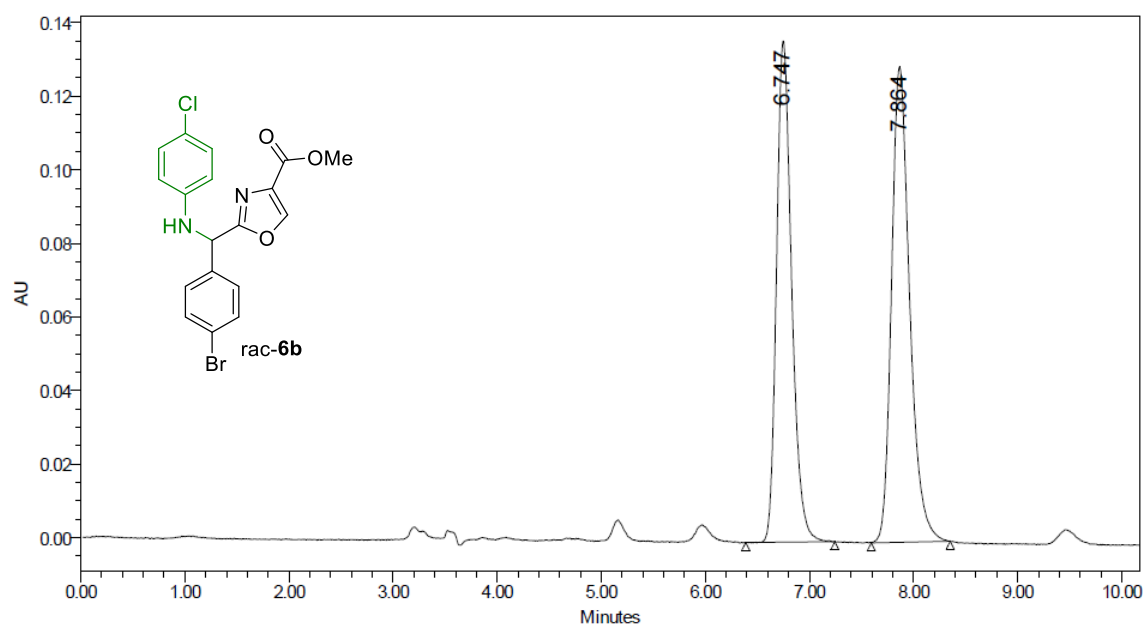

|   | RT<br>(min) | Peak<br>Type | Area<br>( $\mu\text{V}\cdot\text{sec}$ ) | % Area | Height<br>( $\mu\text{V}$ ) | % Height | Integration<br>Type | Points<br>Across Peak | Start<br>Time<br>(min) | End<br>Time<br>(min) |
|---|-------------|--------------|------------------------------------------|--------|-----------------------------|----------|---------------------|-----------------------|------------------------|----------------------|
| 1 | 6.747       | Unknown      | 1373395                                  | 46.79  | 136239                      | 51.32    | bb                  | 514                   | 6.387                  | 7.243                |
| 2 | 7.864       | Unknown      | 1561869                                  | 53.21  | 129213                      | 48.68    | Bb                  | 455                   | 7.593                  | 8.352                |

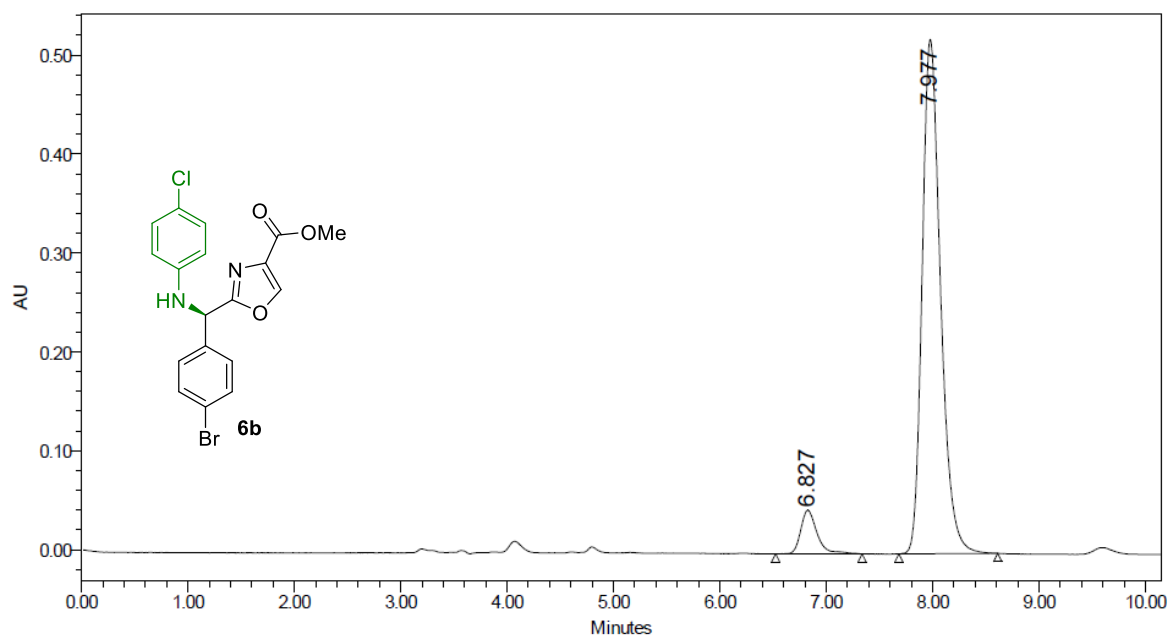

|   | RT<br>(min) | Peak<br>Type | Area<br>( $\mu\text{V}\cdot\text{sec}$ ) | % Area | Height<br>( $\mu\text{V}$ ) | % Height | Integration<br>Type | Points<br>Across Peak | Start<br>Time<br>(min) | End<br>Time<br>(min) |
|---|-------------|--------------|------------------------------------------|--------|-----------------------------|----------|---------------------|-----------------------|------------------------|----------------------|
| 1 | 6.827       | Unknown      | 468922                                   | 7.00   | 43941                       | 7.79     | bB                  | 487                   | 6.525                  | 7.337                |
| 2 | 7.977       | Unknown      | 6230899                                  | 93.00  | 520014                      | 92.21    | BB                  | 558                   | 7.682                  | 8.612                |



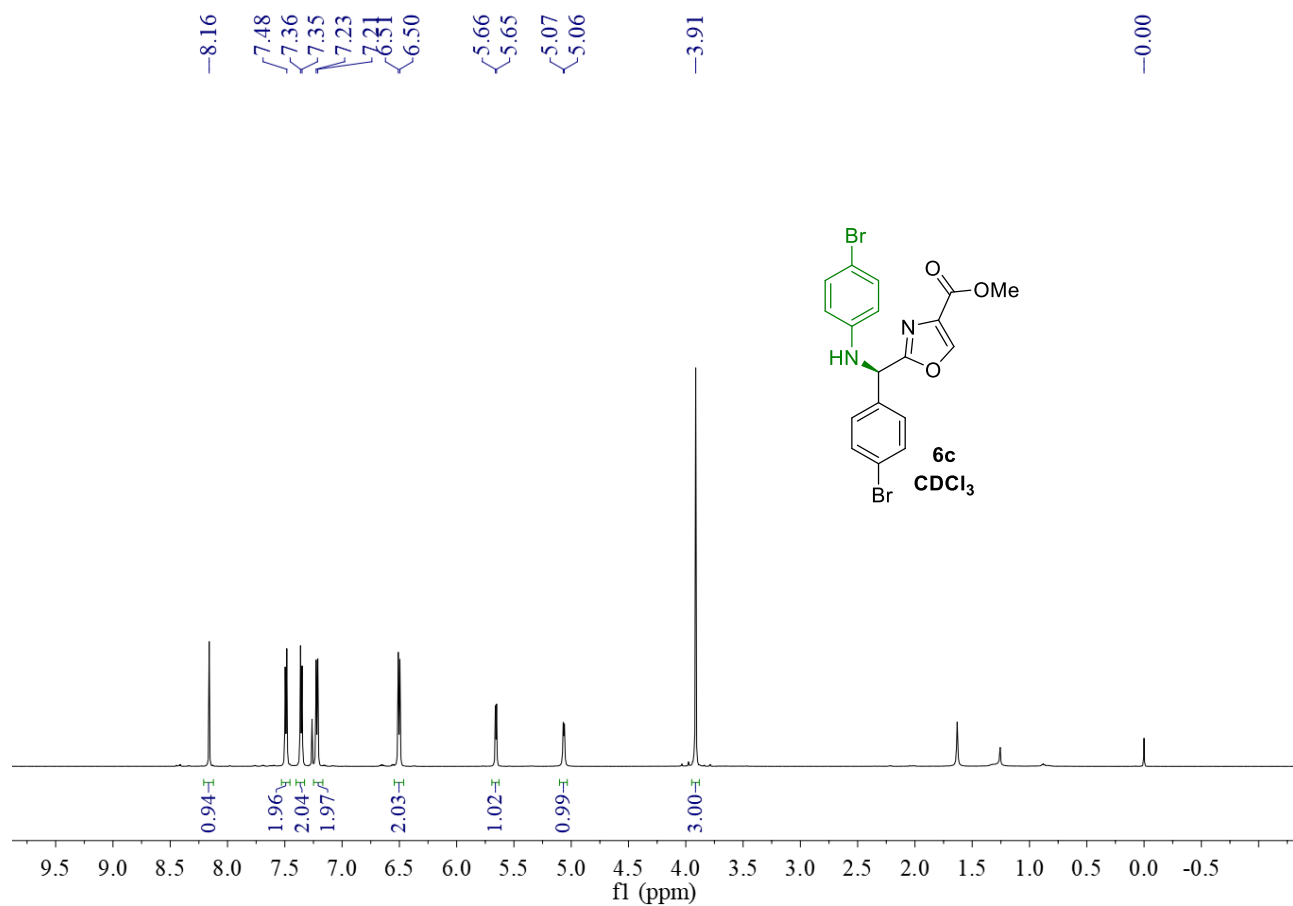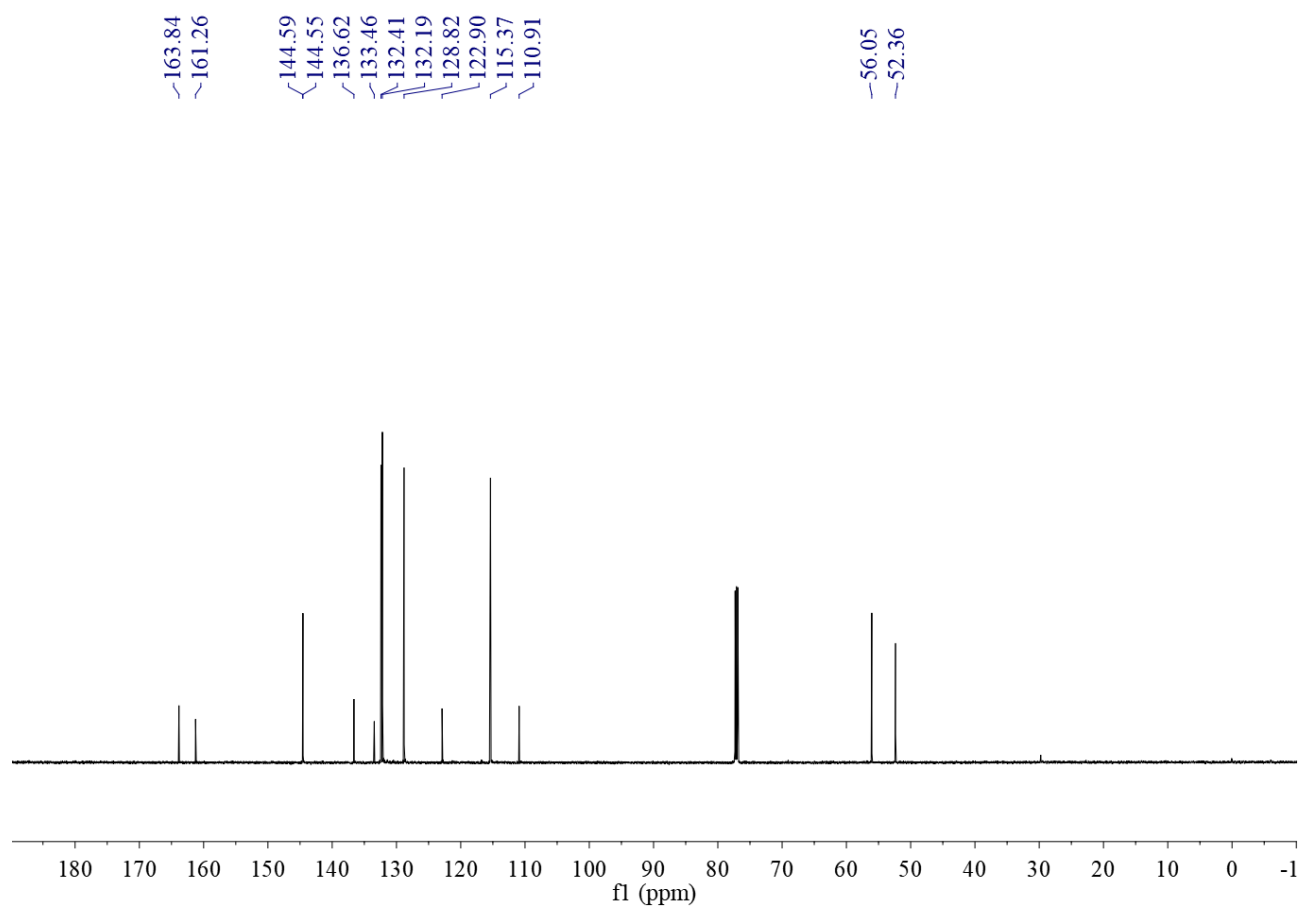

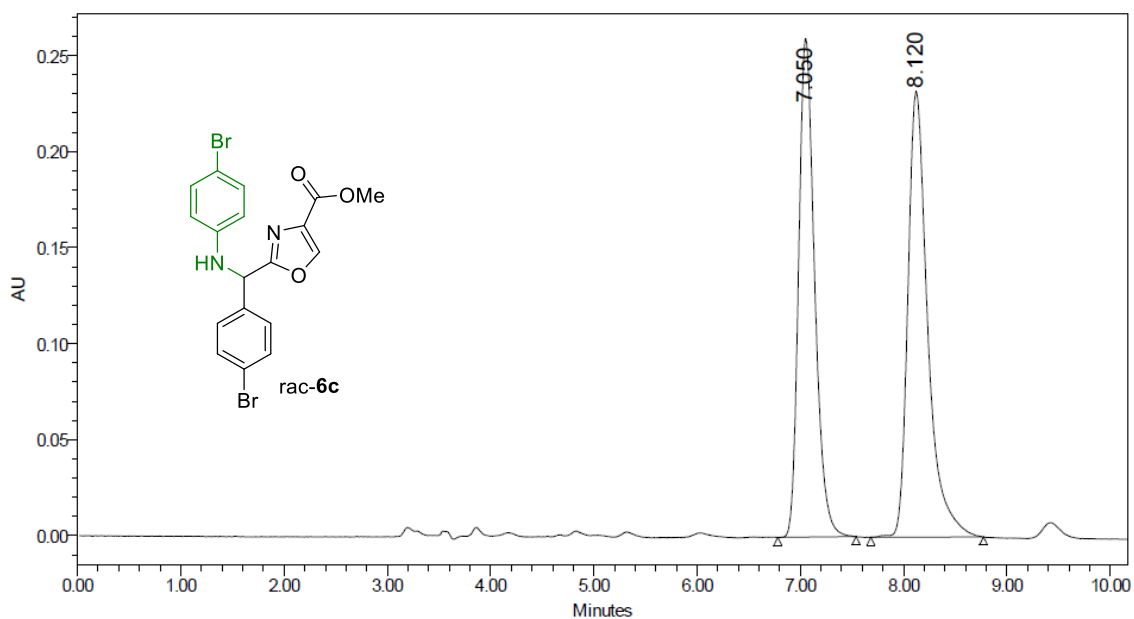

|   | RT (min) | Peak Type | Area (μV*sec) | % Area | Height (μV) | % Height | Integration Type | Points Across Peak | Start Time (min) | End Time (min) |
|---|----------|-----------|---------------|--------|-------------|----------|------------------|--------------------|------------------|----------------|
| 1 | 7.050    | Unknown   | 2793206       | 47.41  | 259612      | 52.80    | bb               | 454                | 6.782            | 7.538          |
| 2 | 8.120    | Unknown   | 3097862       | 52.59  | 232059      | 47.20    | bb               | 654                | 7.682            | 8.772          |

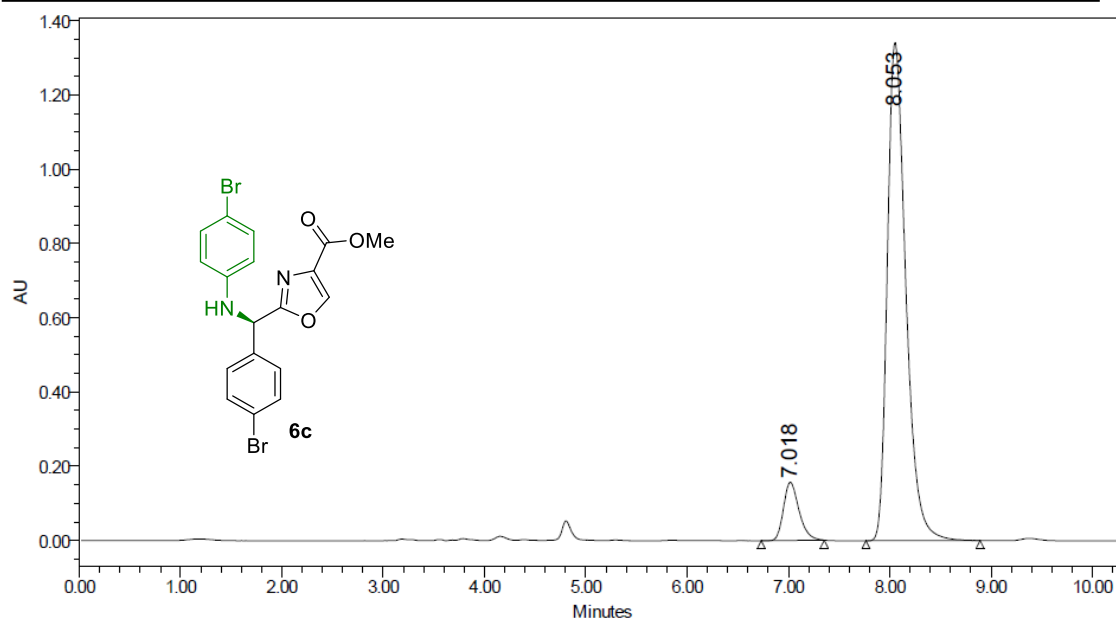

|   | RT (min) | Peak Type | Area (μV*sec) | % Area | Height (μV) | % Height | Integration Type | Points Across Peak | Start Time (min) | End Time (min) |
|---|----------|-----------|---------------|--------|-------------|----------|------------------|--------------------|------------------|----------------|
| 1 | 7.018    | Unknown   | 1667350       | 8.92   | 156620      | 10.46    | bb               | 373                | 6.732            | 7.353          |
| 2 | 8.053    | Unknown   | 17022657      | 91.08  | 1341359     | 89.54    | bb               | 676                | 7.765            | 8.892          |

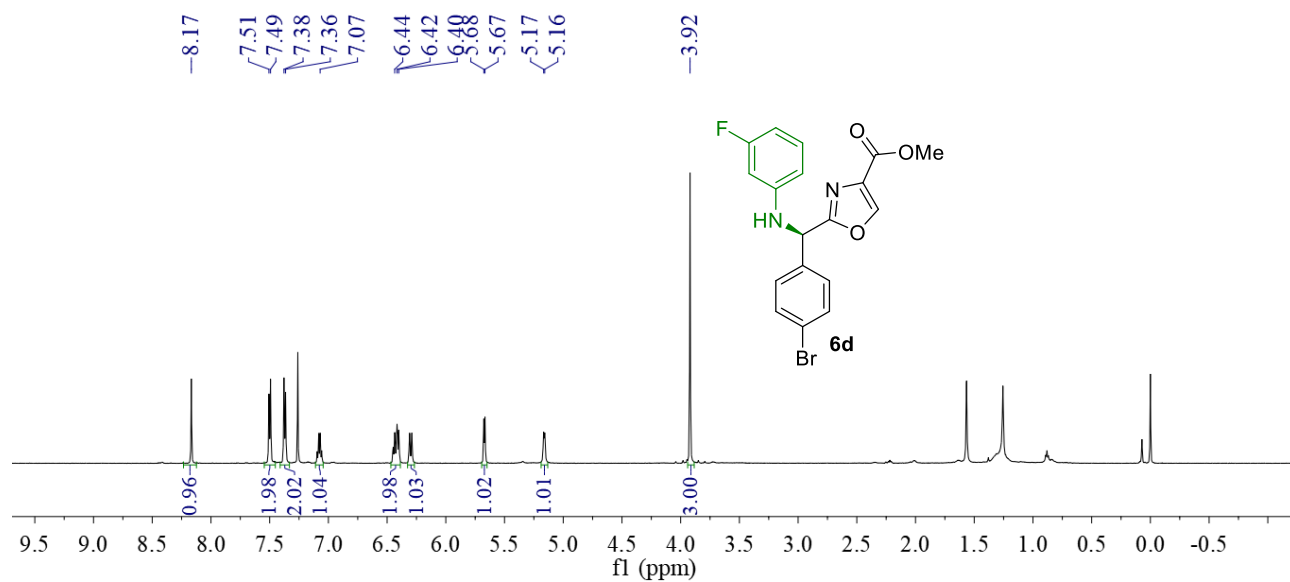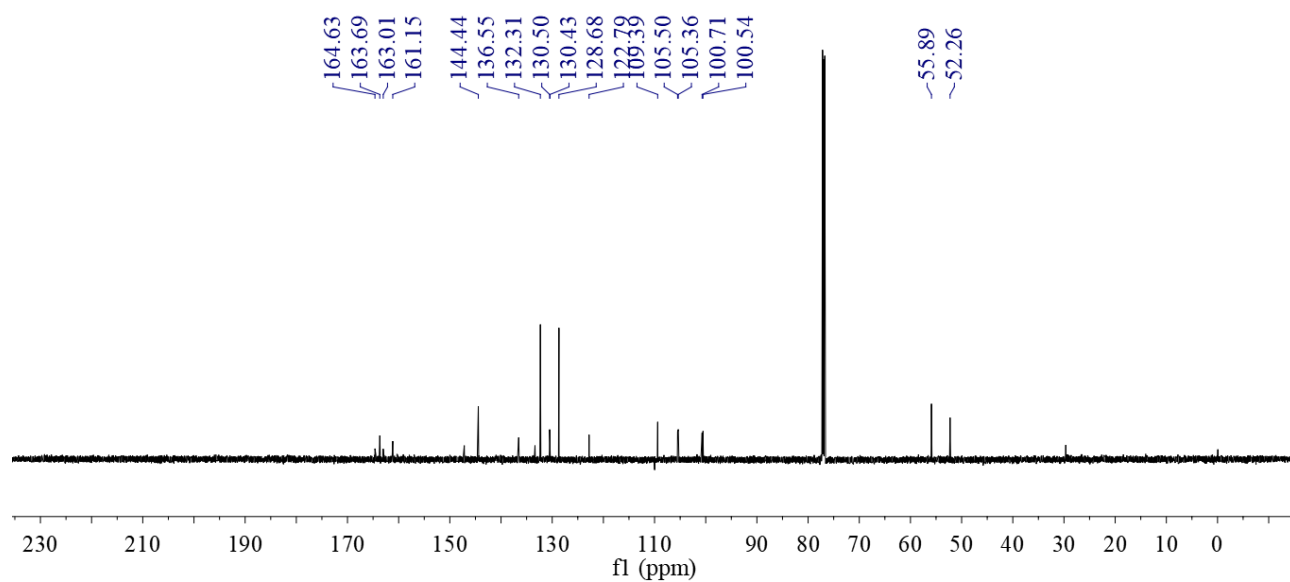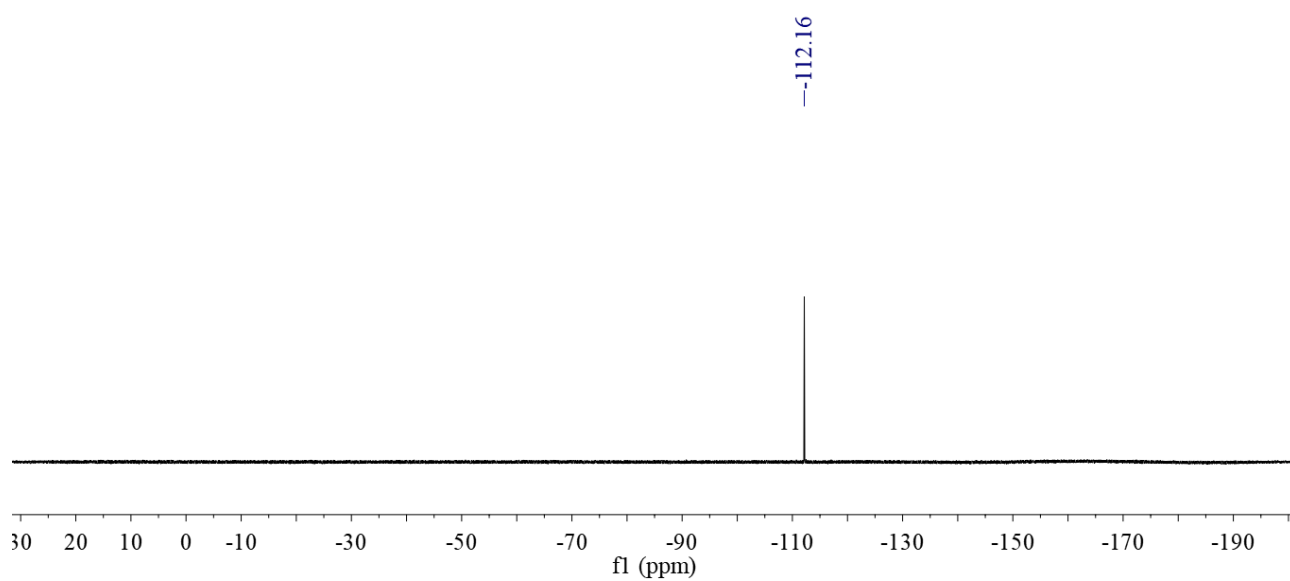

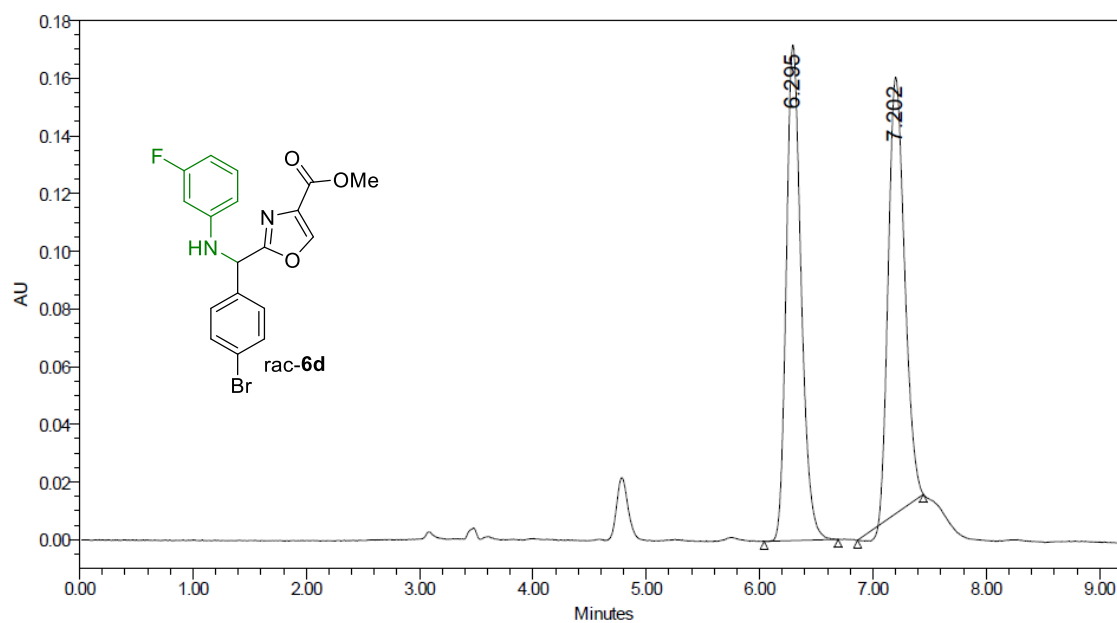

|   | RT<br>(min) | Peak<br>Type | Area<br>( $\mu\text{V}\cdot\text{sec}$ ) | % Area | Height<br>( $\mu\text{V}$ ) | % Height | Integration<br>Type | Points<br>Across Peak | Start<br>Time<br>(min) | End<br>Time<br>(min) |
|---|-------------|--------------|------------------------------------------|--------|-----------------------------|----------|---------------------|-----------------------|------------------------|----------------------|
| 1 | 6.295       | Unknown      | 1565188                                  | 50.37  | 171801                      | 53.19    | bb                  | 392                   | 6.040                  | 6.693                |
| 2 | 7.202       | Unknown      | 1541945                                  | 49.63  | 151217                      | 46.81    | bb                  | 348                   | 6.865                  | 7.445                |

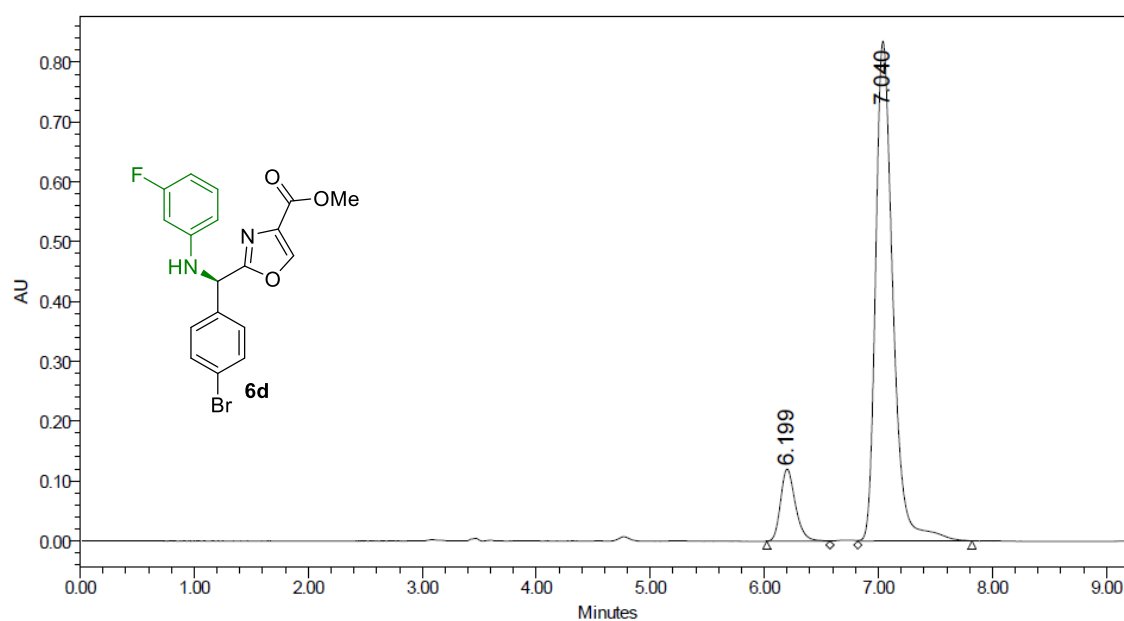

|   | RT<br>(min) | Peak<br>Type | Area<br>( $\mu\text{V}\cdot\text{sec}$ ) | % Area | Height<br>( $\mu\text{V}$ ) | % Height | Integration<br>Type | Points<br>Across Peak | Start<br>Time<br>(min) | End<br>Time<br>(min) |
|---|-------------|--------------|------------------------------------------|--------|-----------------------------|----------|---------------------|-----------------------|------------------------|----------------------|
| 1 | 6.199       | Unknown      | 1086079                                  | 11.00  | 120296                      | 12.59    | bV                  | 332                   | 6.022                  | 6.575                |
| 2 | 7.040       | Unknown      | 8783832                                  | 89.00  | 835464                      | 87.41    | Vb                  | 601                   | 6.818                  | 7.820                |

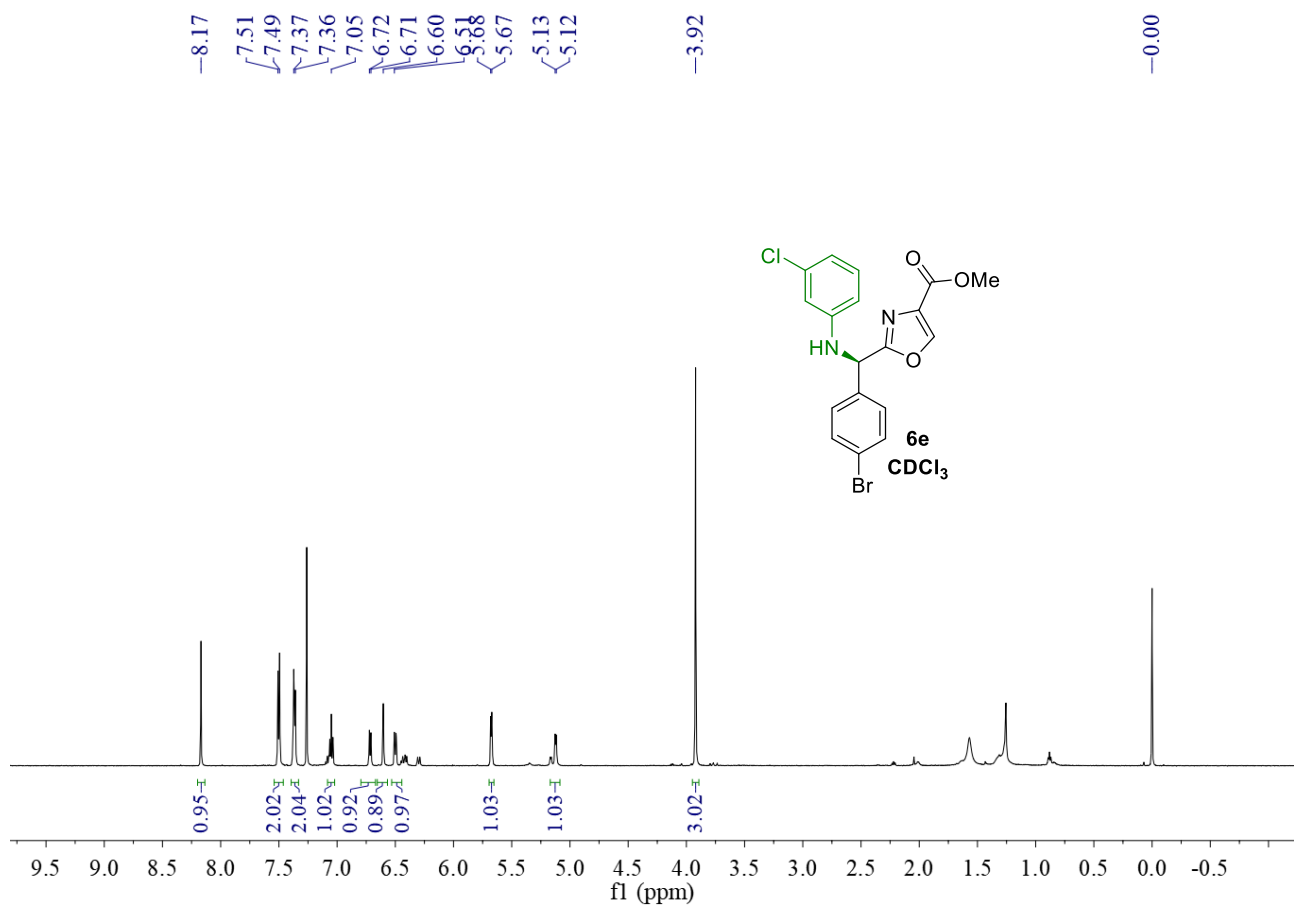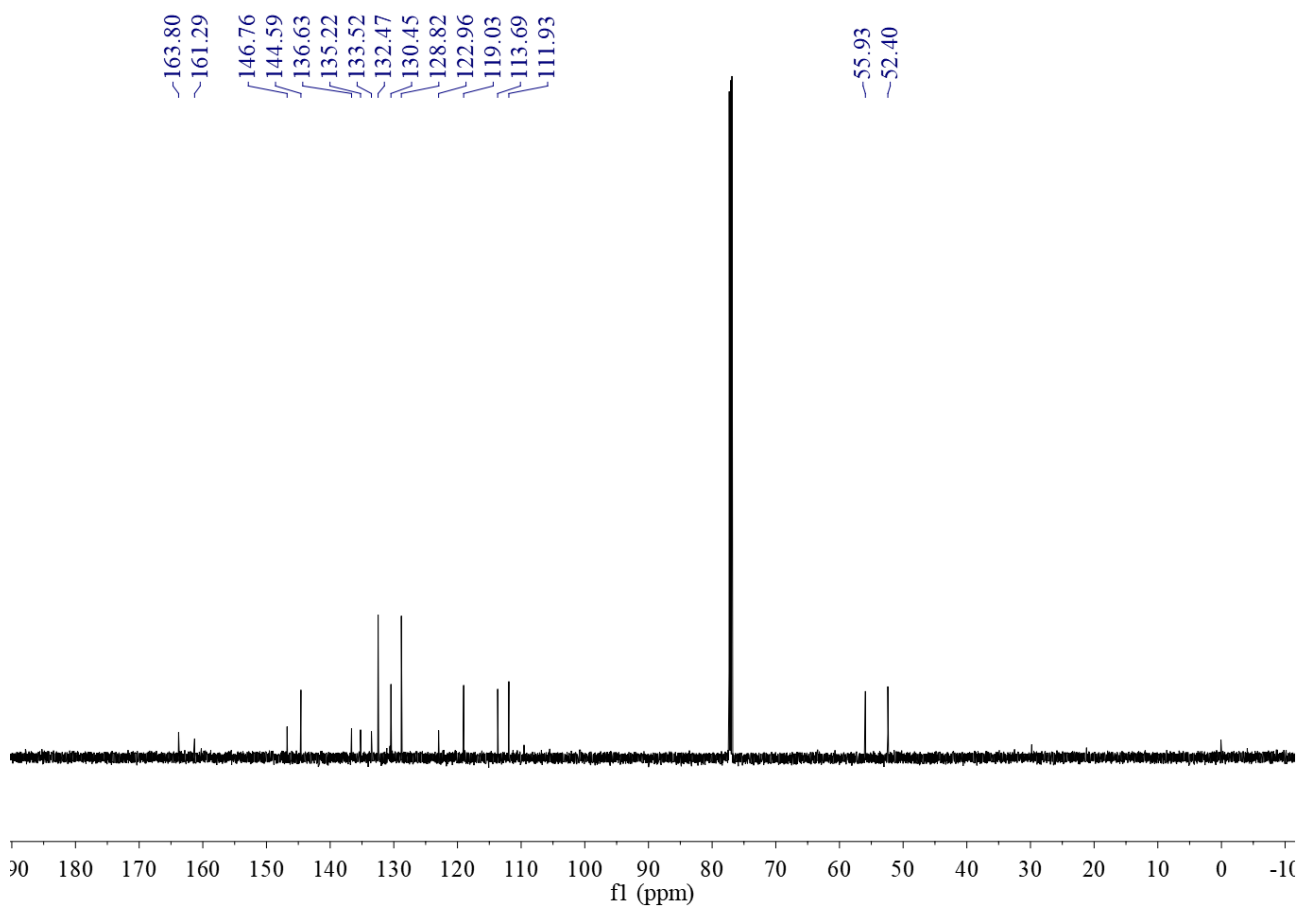

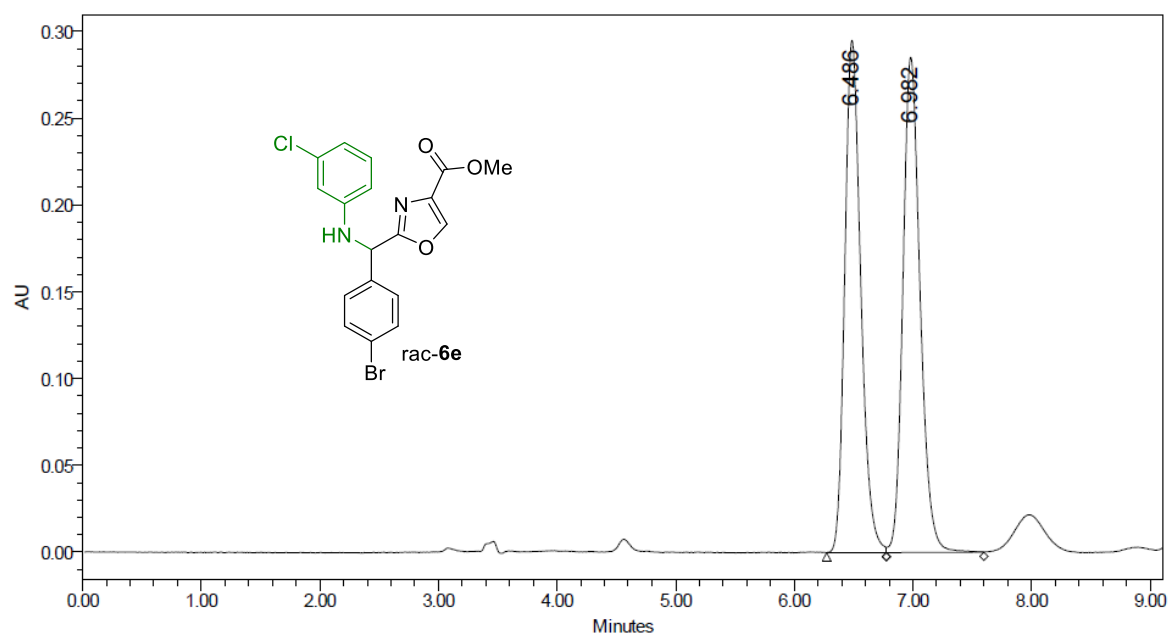

|   | RT<br>(min) | Peak<br>Type | Area<br>( $\mu\text{V}\cdot\text{sec}$ ) | % Area | Height<br>( $\mu\text{V}$ ) | % Height | Integration<br>Type | Points<br>Across Peak | Start<br>Time<br>(min) | End<br>Time<br>(min) |
|---|-------------|--------------|------------------------------------------|--------|-----------------------------|----------|---------------------|-----------------------|------------------------|----------------------|
| 1 | 6.486       | Unknown      | 2771834                                  | 49.06  | 295207                      | 50.84    | BV                  | 302                   | 6.273                  | 6.777                |
| 2 | 6.982       | Unknown      | 2877986                                  | 50.94  | 285472                      | 49.16    | VV                  | 493                   | 6.777                  | 7.598                |

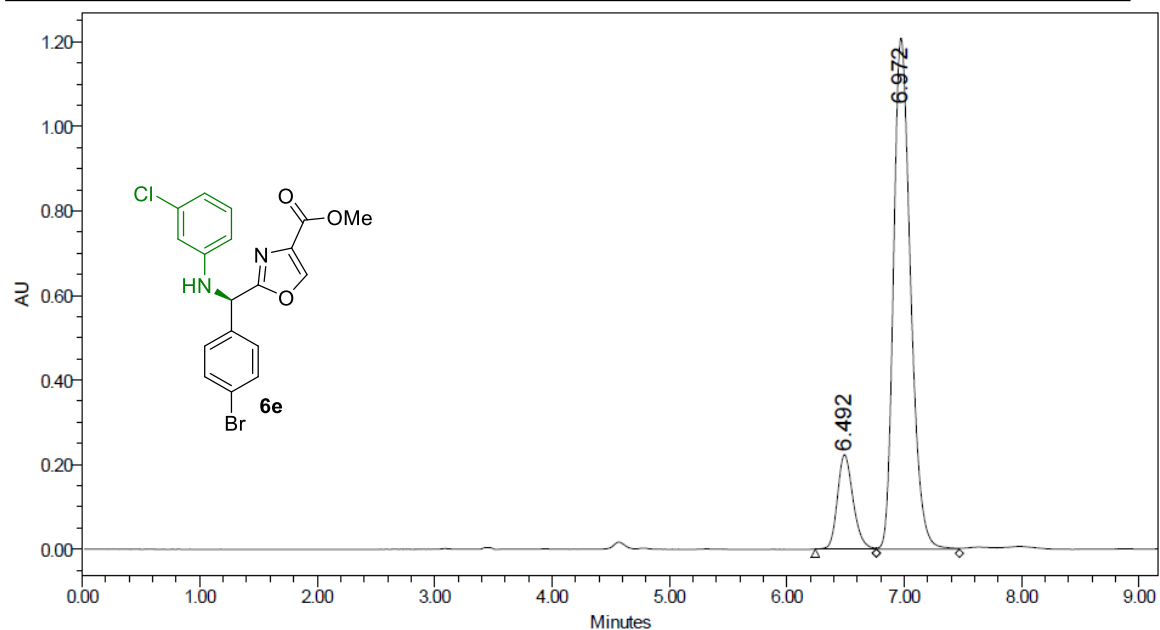

|   | RT<br>(min) | Peak<br>Type | Area<br>( $\mu\text{V}\cdot\text{sec}$ ) | % Area | Height<br>( $\mu\text{V}$ ) | % Height | Integration<br>Type | Points<br>Across Peak | Start<br>Time<br>(min) | End<br>Time<br>(min) |
|---|-------------|--------------|------------------------------------------|--------|-----------------------------|----------|---------------------|-----------------------|------------------------|----------------------|
| 1 | 6.492       | Unknown      | 2068294                                  | 14.50  | 223417                      | 15.60    | bV                  | 311                   | 6.243                  | 6.762                |
| 2 | 6.972       | Unknown      | 12200559                                 | 85.50  | 1208828                     | 84.40    | VV                  | 425                   | 6.762                  | 7.470                |

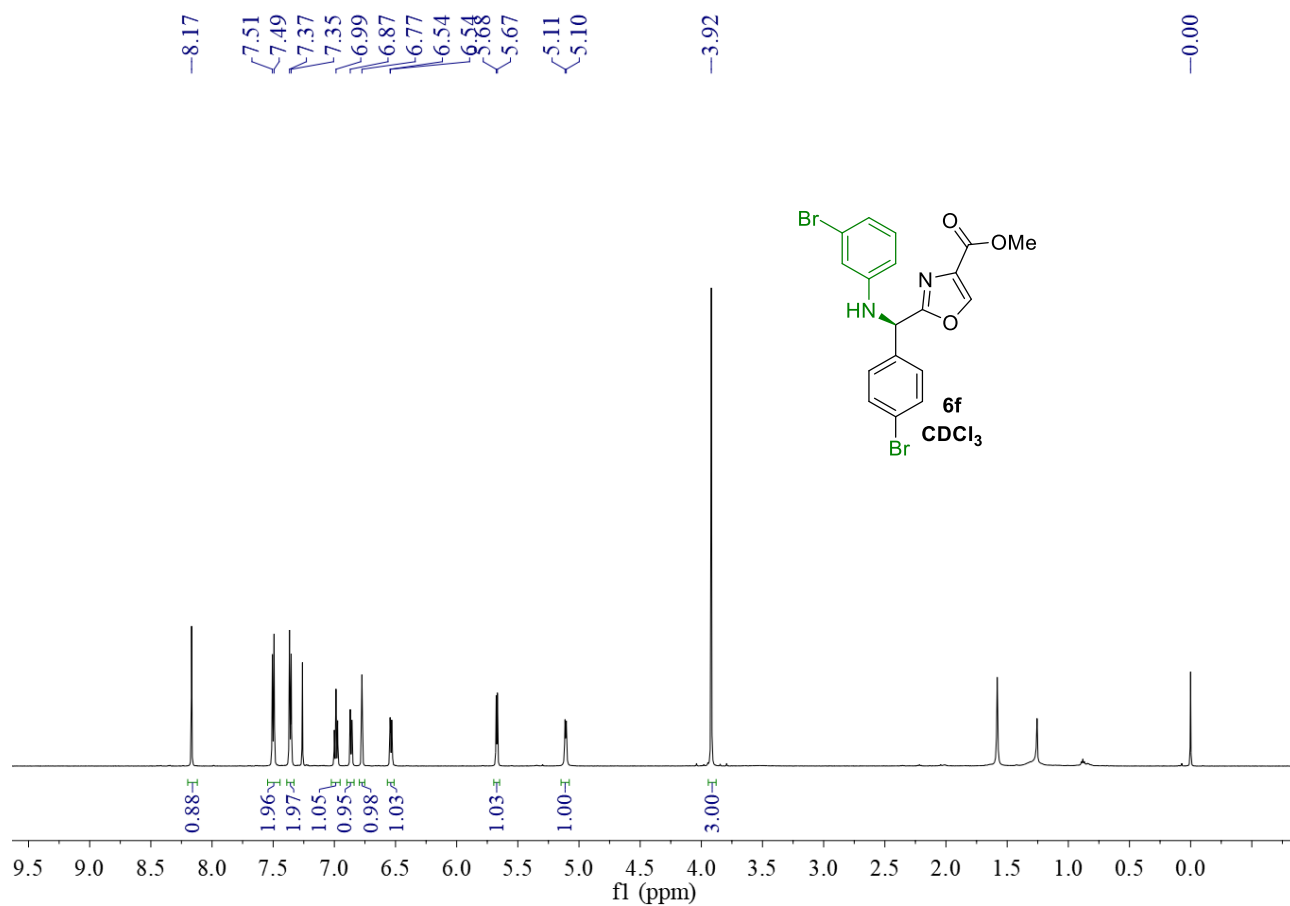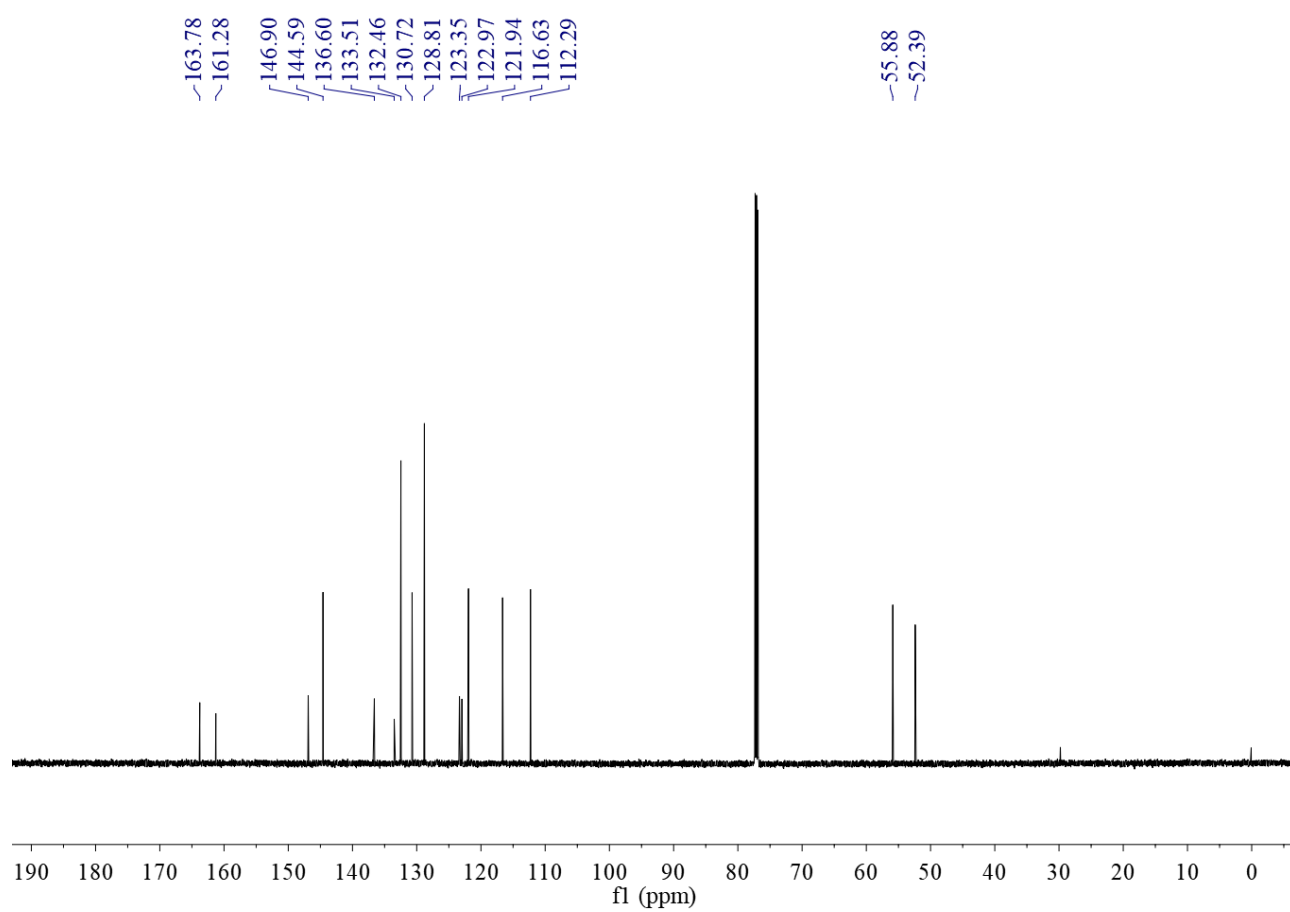

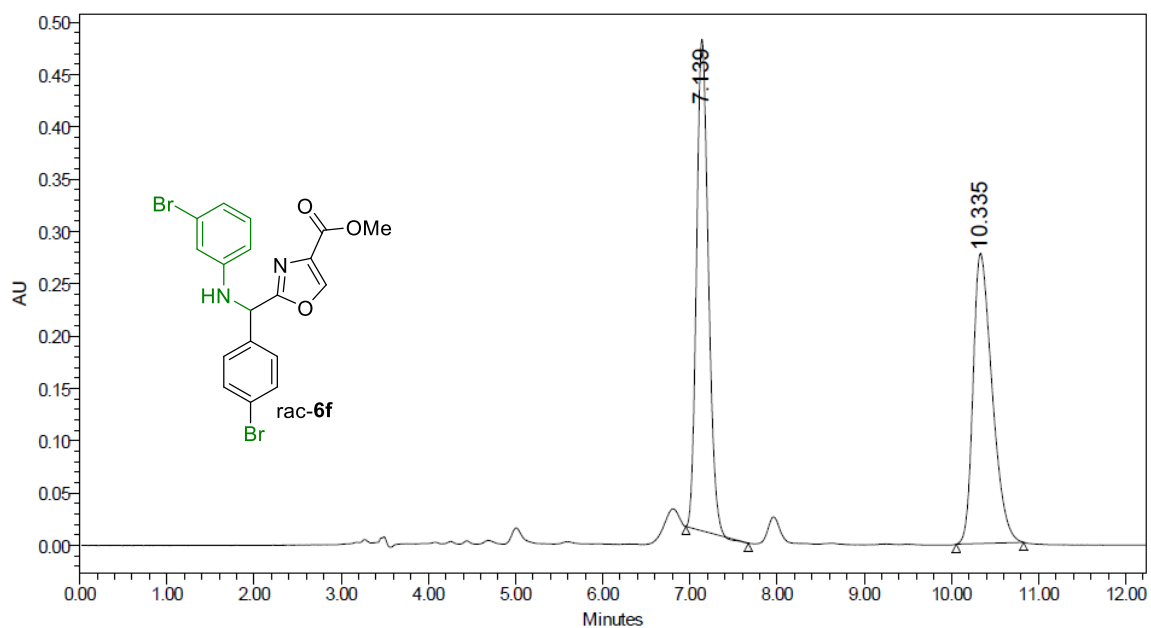

|   | RT<br>(min) | Peak<br>Type | Area<br>( $\mu\text{V}\cdot\text{sec}$ ) | % Area | Height<br>( $\mu\text{V}$ ) | % Height | Integration<br>Type | Points<br>Across Peak | Start<br>Time<br>(min) | End<br>Time<br>(min) |
|---|-------------|--------------|------------------------------------------|--------|-----------------------------|----------|---------------------|-----------------------|------------------------|----------------------|
| 1 | 7.139       | Unknown      | 4450754                                  | 51.35  | 469947                      | 62.91    | bb                  | 429                   | 6.957                  | 7.672                |
| 2 | 10.335      | Unknown      | 4215913                                  | 48.65  | 277074                      | 37.09    | bb                  | 463                   | 10.057                 | 10.828               |

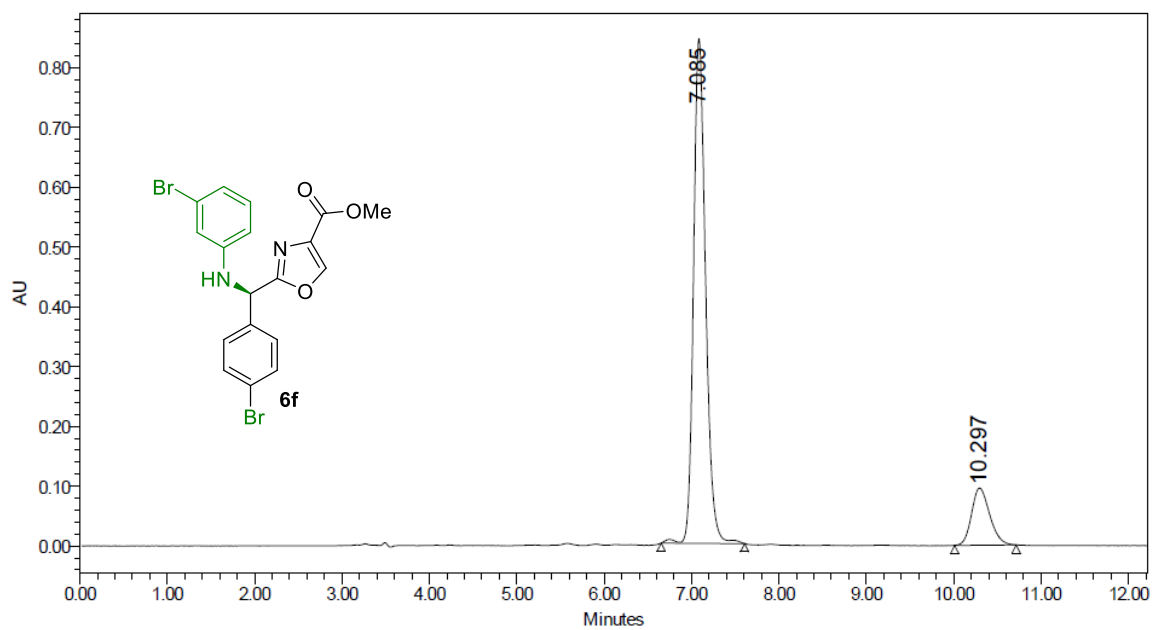

|   | RT<br>(min) | Peak<br>Type | Area<br>( $\mu\text{V}\cdot\text{sec}$ ) | % Area | Height<br>( $\mu\text{V}$ ) | % Height | Integration<br>Type | Points<br>Across Peak | Start<br>Time<br>(min) | End<br>Time<br>(min) |
|---|-------------|--------------|------------------------------------------|--------|-----------------------------|----------|---------------------|-----------------------|------------------------|----------------------|
| 1 | 7.085       | Unknown      | 8096127                                  | 85.51  | 844184                      | 89.83    | bb                  | 572                   | 6.653                  | 7.607                |
| 2 | 10.297      | Unknown      | 1372140                                  | 14.49  | 95611                       | 10.17    | bb                  | 422                   | 10.010                 | 10.713               |



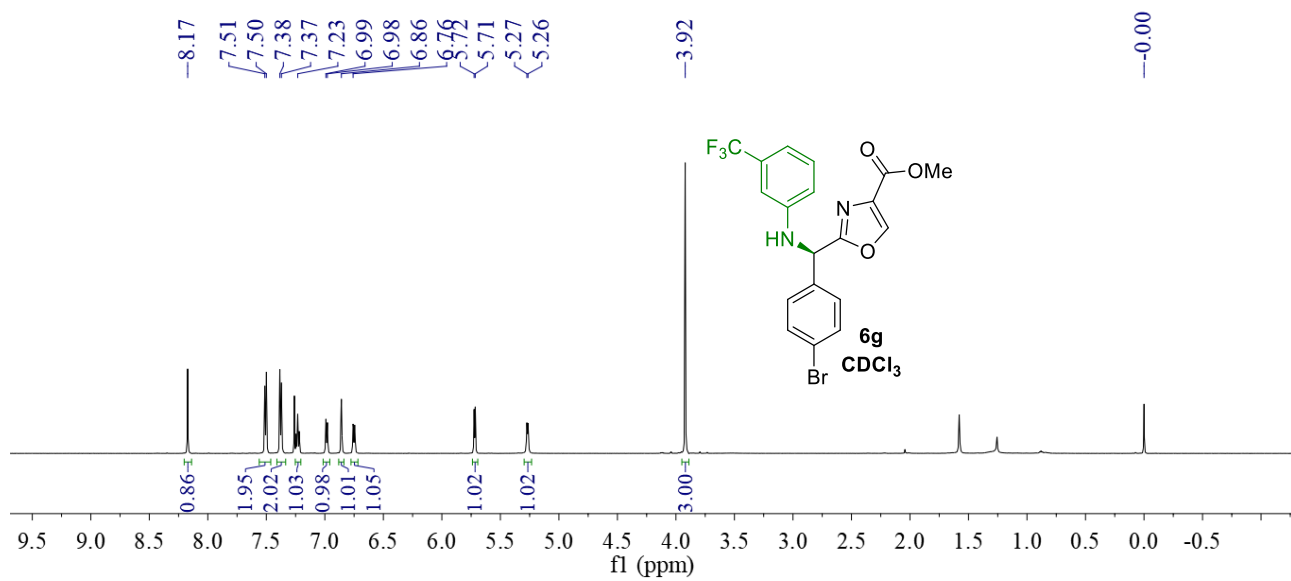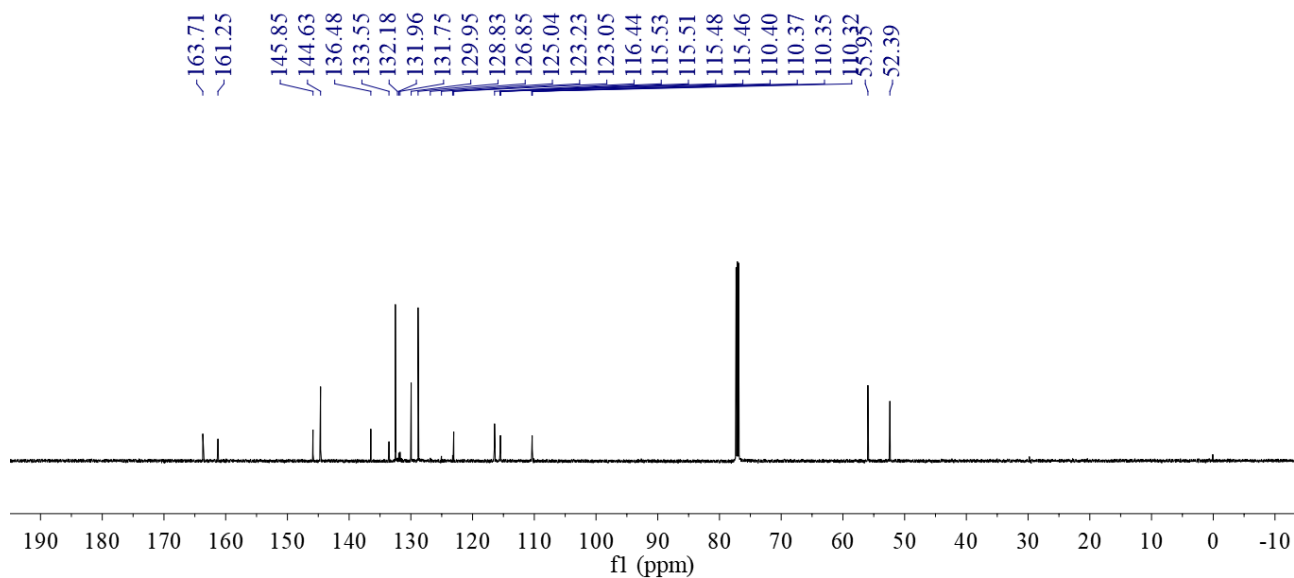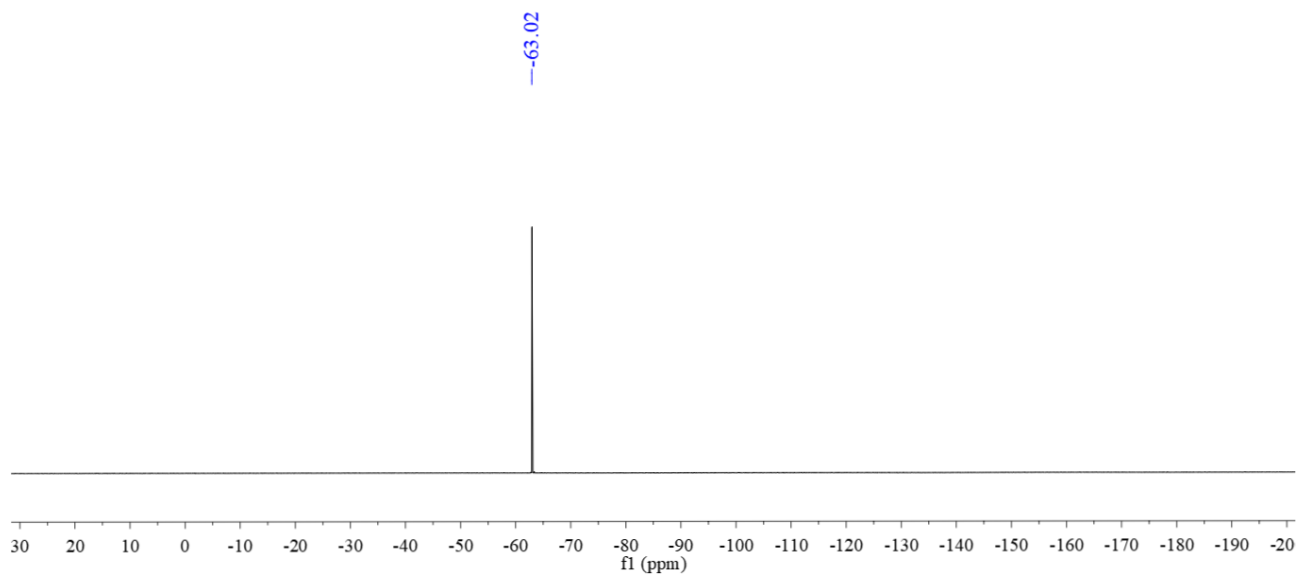

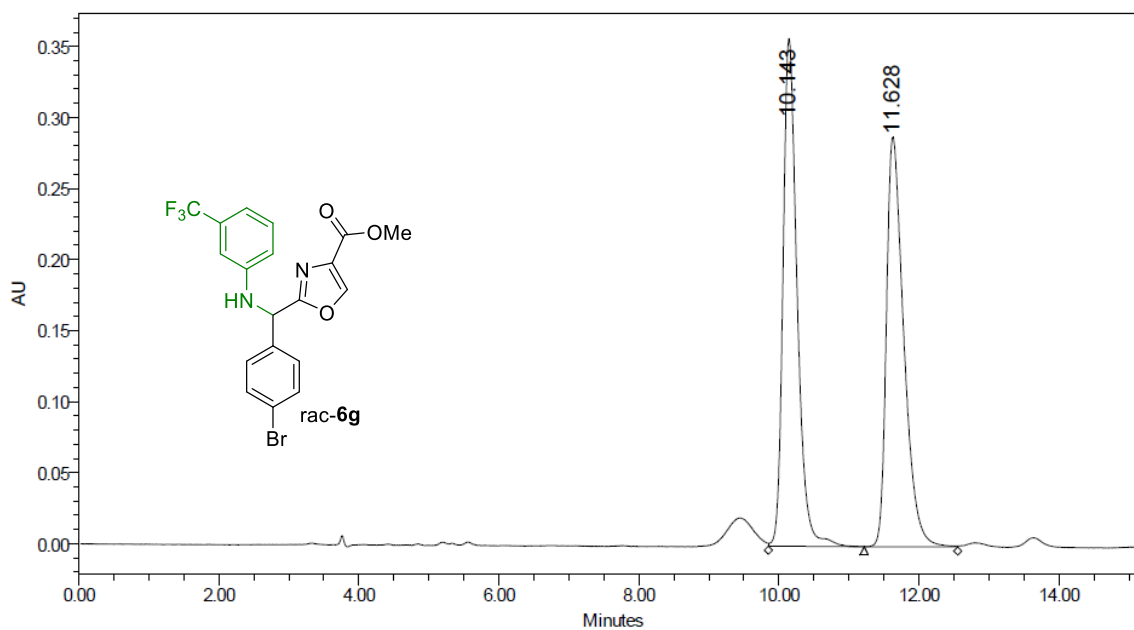

|   | RT (min) | Peak Type | Area (μV*sec) | % Area | Height (μV) | % Height | Integration Type | Points Across Peak | Start Time (min) | End Time (min) |
|---|----------|-----------|---------------|--------|-------------|----------|------------------|--------------------|------------------|----------------|
| 1 | 10.143   | Unknown   | 5010725       | 50.18  | 357416      | 55.36    | VB               | 822                | 9.848            | 11.218         |
| 2 | 11.628   | Unknown   | 4974166       | 49.82  | 288253      | 44.64    | BV               | 801                | 11.218           | 12.553         |

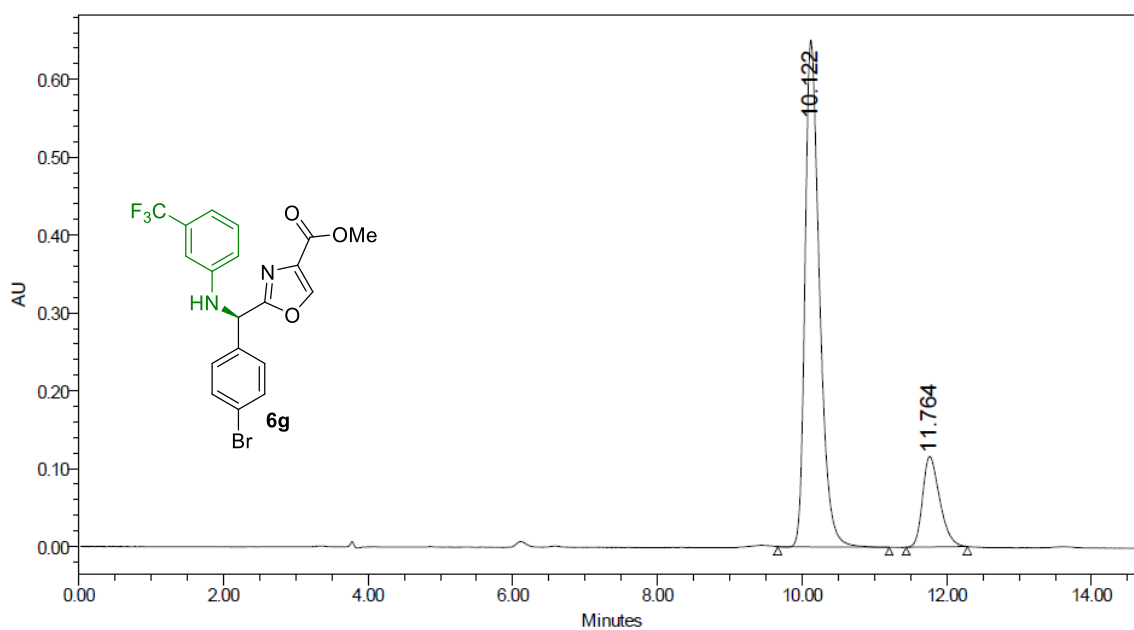

|   | RT (min) | Peak Type | Area (μV*sec) | % Area | Height (μV) | % Height | Integration Type | Points Across Peak | Start Time (min) | End Time (min) |
|---|----------|-----------|---------------|--------|-------------|----------|------------------|--------------------|------------------|----------------|
| 1 | 10.122   | Unknown   | 9046425       | 82.52  | 650737      | 84.85    | bb               | 923                | 9.665            | 11.203         |
| 2 | 11.764   | Unknown   | 1916779       | 17.48  | 116216      | 15.15    | Bb               | 508                | 11.438           | 12.285         |

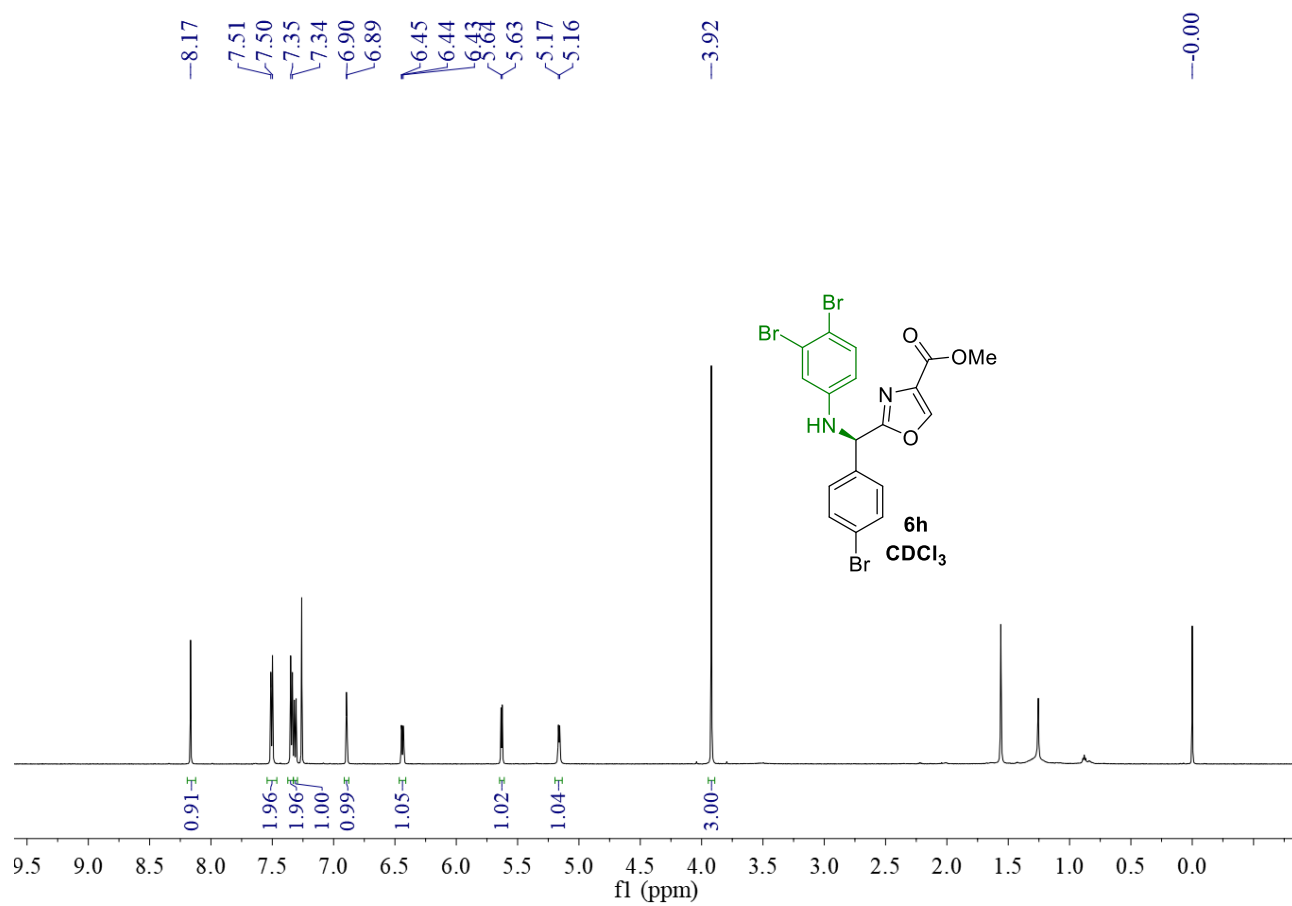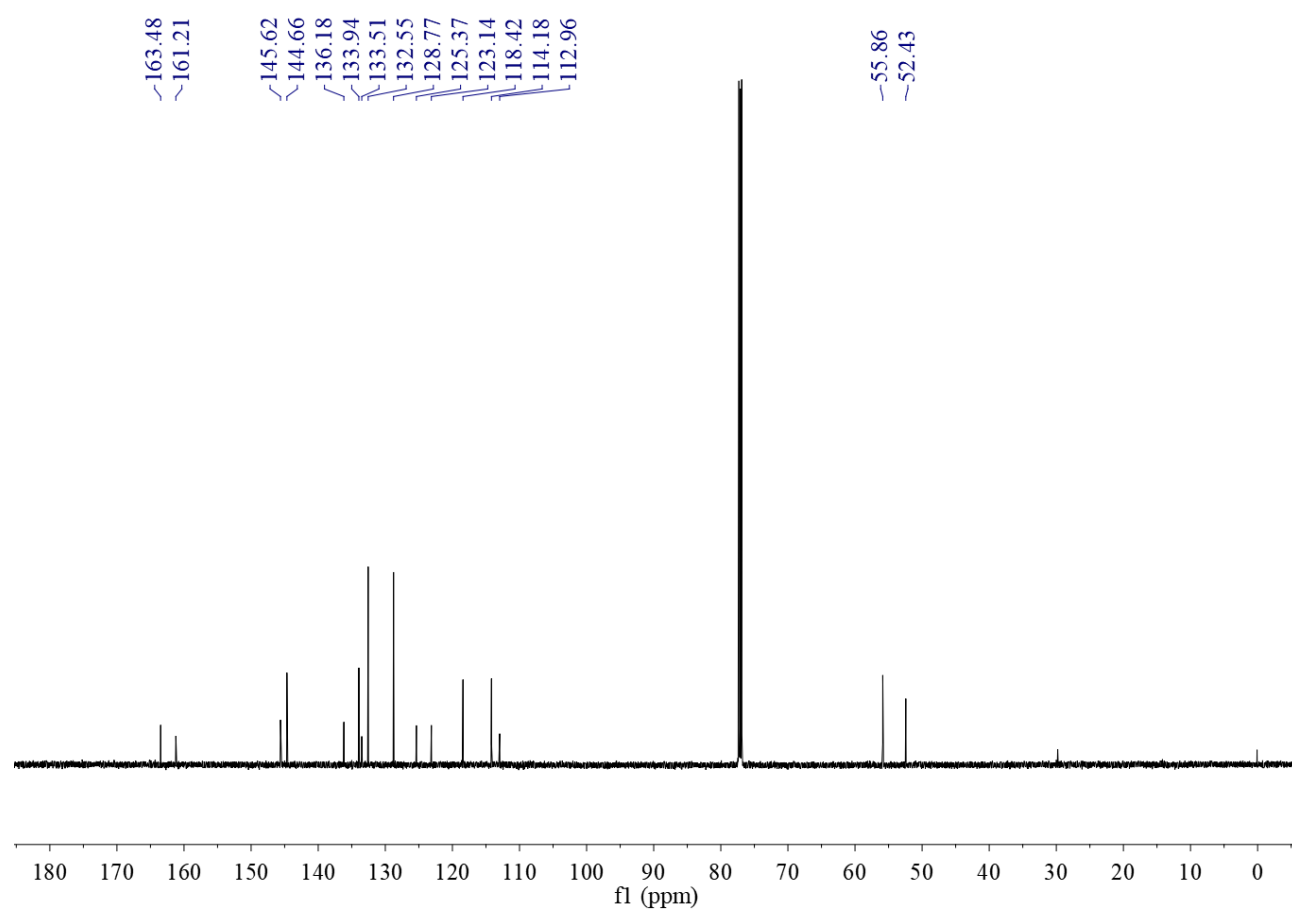

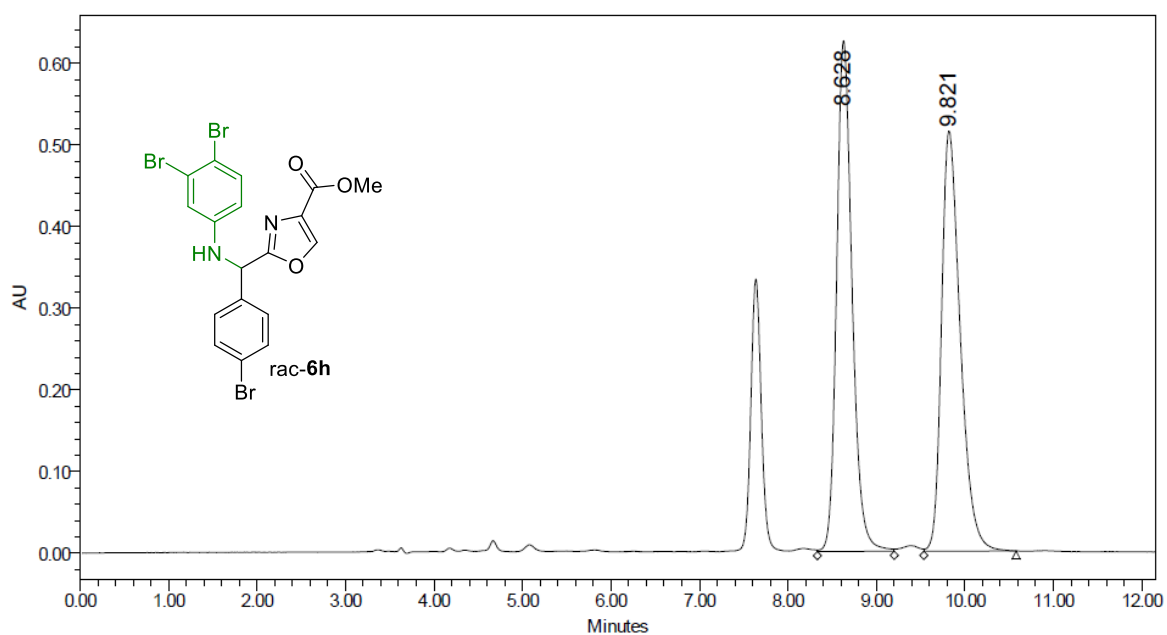

|   | RT (min) | Peak Type | Area (μV*sec) | % Area | Height (μV) | % Height | Integration Type | Points Across Peak | Start Time (min) | End Time (min) |
|---|----------|-----------|---------------|--------|-------------|----------|------------------|--------------------|------------------|----------------|
| 1 | 8.628    | Unknown   | 7609185       | 50.12  | 625375      | 54.88    | VV               | 521                | 8.332            | 9.200          |
| 2 | 9.821    | Unknown   | 7572540       | 49.88  | 514174      | 45.12    | VB               | 626                | 9.535            | 10.578         |

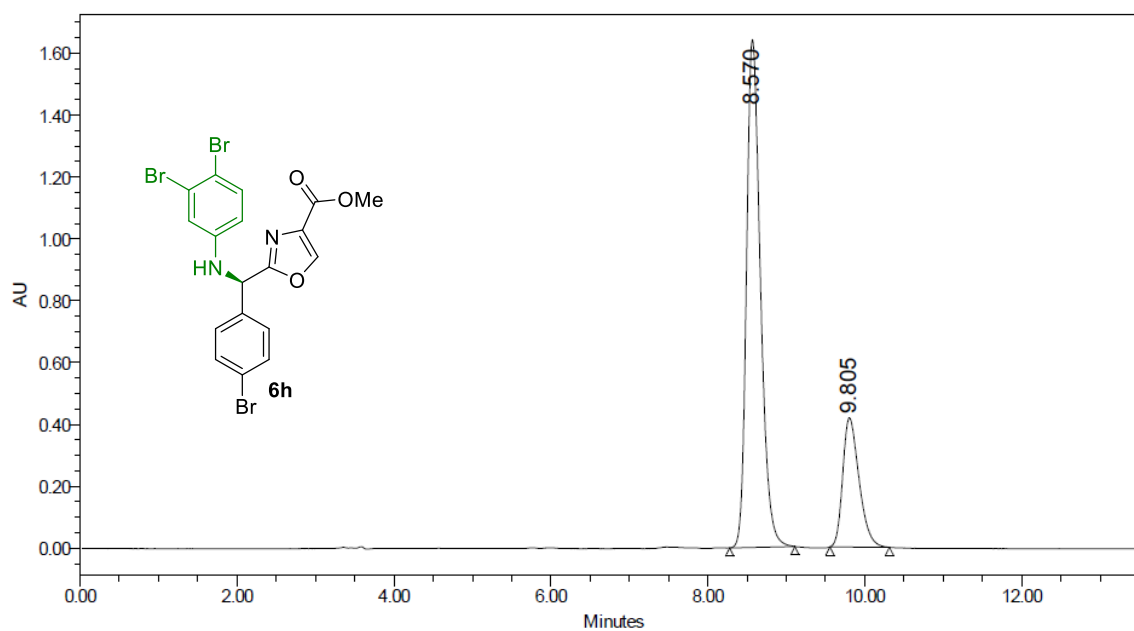

|   | RT (min) | Peak Type | Area (μV*sec) | % Area | Height (μV) | % Height | Integration Type | Points Across Peak | Start Time (min) | End Time (min) |
|---|----------|-----------|---------------|--------|-------------|----------|------------------|--------------------|------------------|----------------|
| 1 | 8.570    | Unknown   | 20247277      | 77.01  | 1640850     | 79.69    | bb               | 499                | 8.278            | 9.110          |
| 2 | 9.805    | Unknown   | 6043951       | 22.99  | 418227      | 20.31    | bb               | 455                | 9.557            | 10.315         |

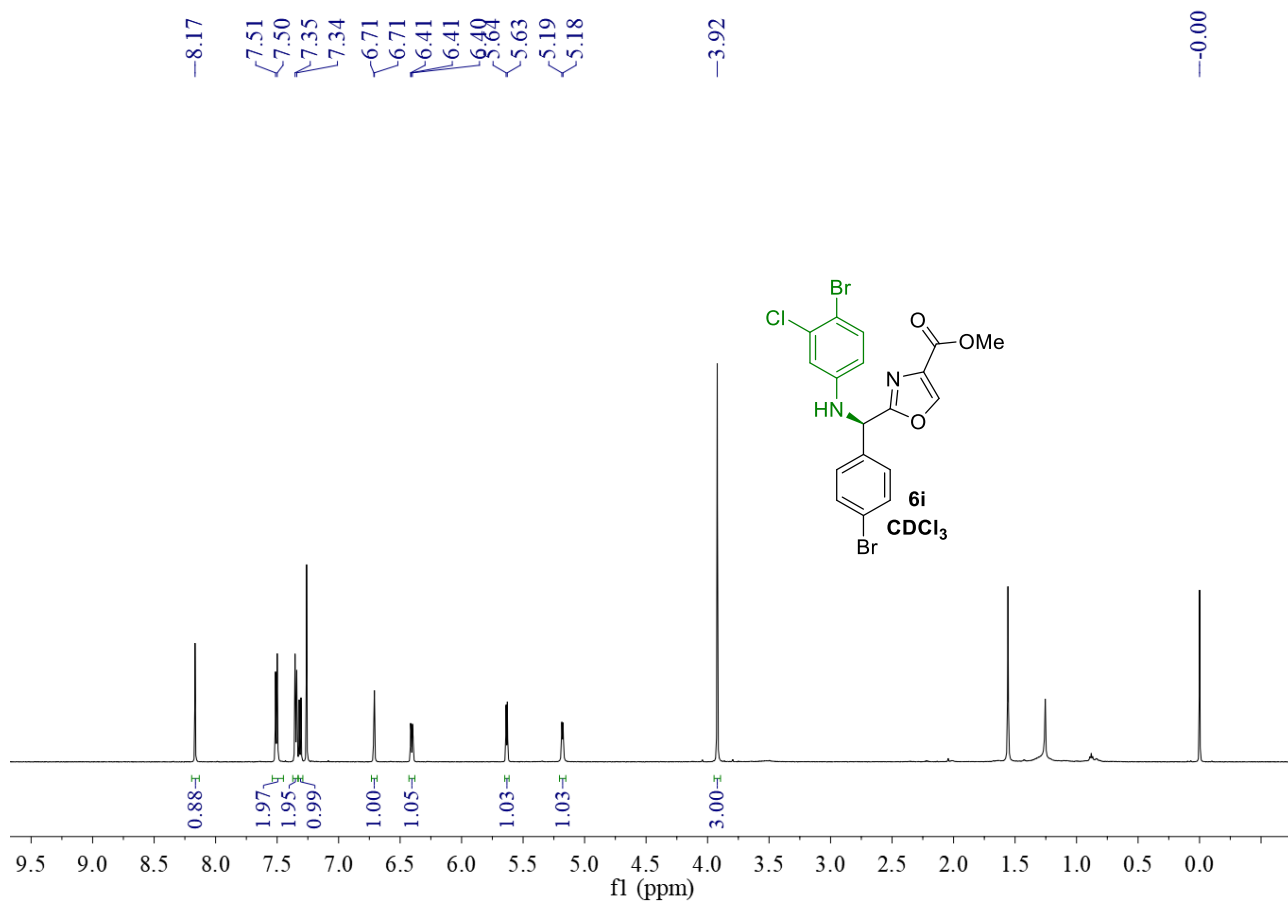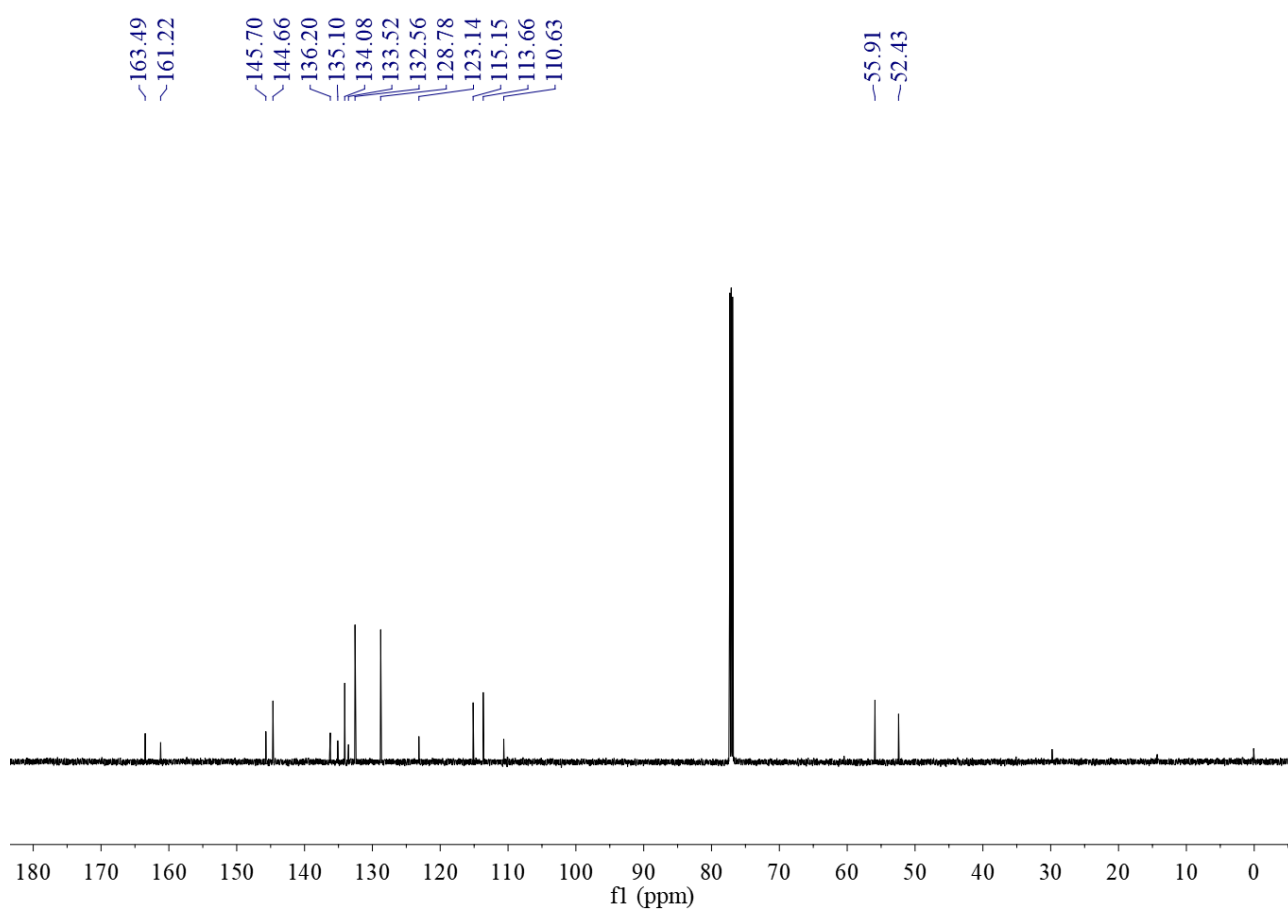

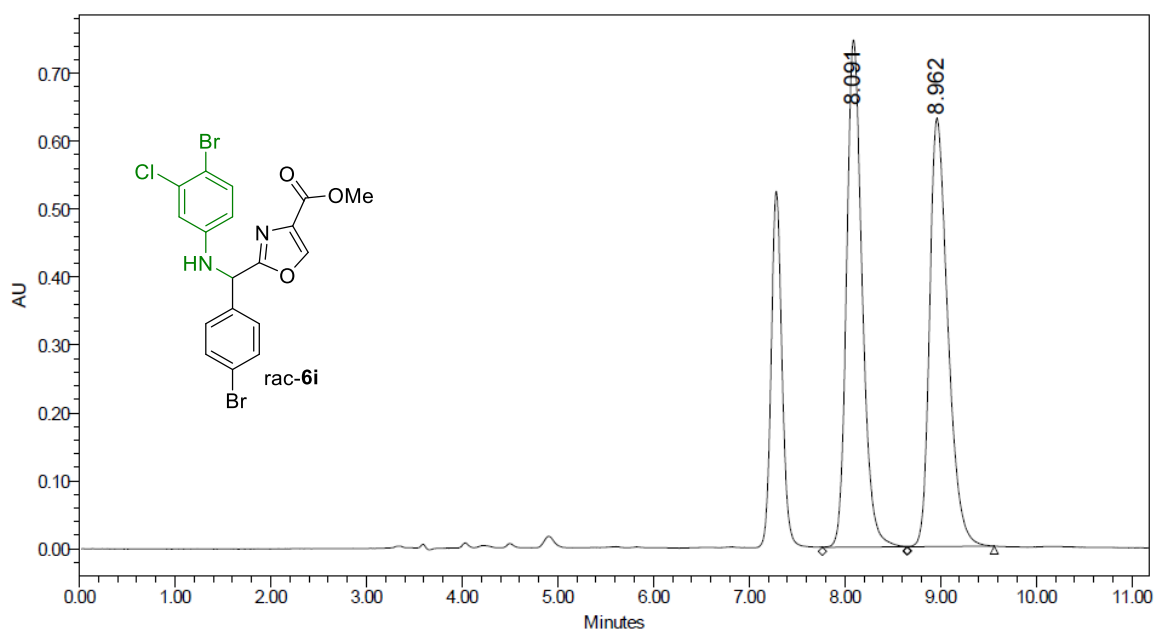

|   | RT (min) | Peak Type | Area (μV*sec) | % Area | Height (μV) | % Height | Integration Type | Points Across Peak | Start Time (min) | End Time (min) |
|---|----------|-----------|---------------|--------|-------------|----------|------------------|--------------------|------------------|----------------|
| 1 | 8.091    | Unknown   | 8463046       | 50.37  | 746180      | 54.22    | VV               | 532                | 7.765            | 8.652          |
| 2 | 8.962    | Unknown   | 8340327       | 49.63  | 630111      | 45.78    | VB               | 546                | 8.652            | 9.562          |

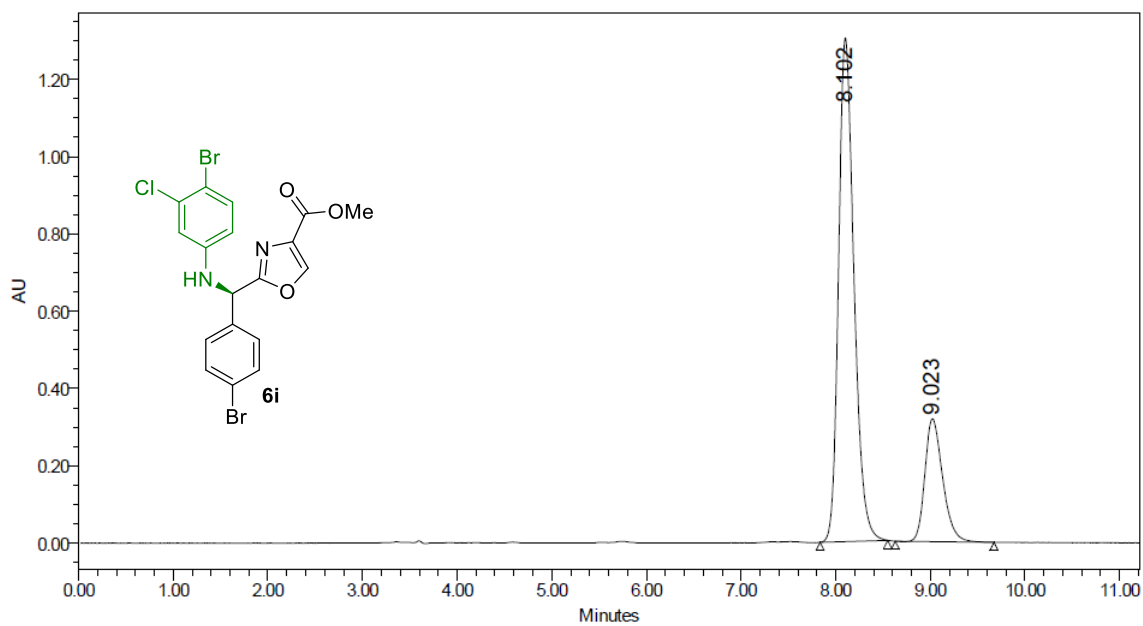

|   | RT (min) | Peak Type | Area (μV*sec) | % Area | Height (μV) | % Height | Integration Type | Points Across Peak | Start Time (min) | End Time (min) |
|---|----------|-----------|---------------|--------|-------------|----------|------------------|--------------------|------------------|----------------|
| 1 | 8.102    | Unknown   | 14732193      | 78.00  | 1303208     | 80.39    | bb               | 429                | 7.835            | 8.550          |
| 2 | 9.023    | Unknown   | 4154235       | 22.00  | 317980      | 19.61    | bb               | 626                | 8.630            | 9.673          |

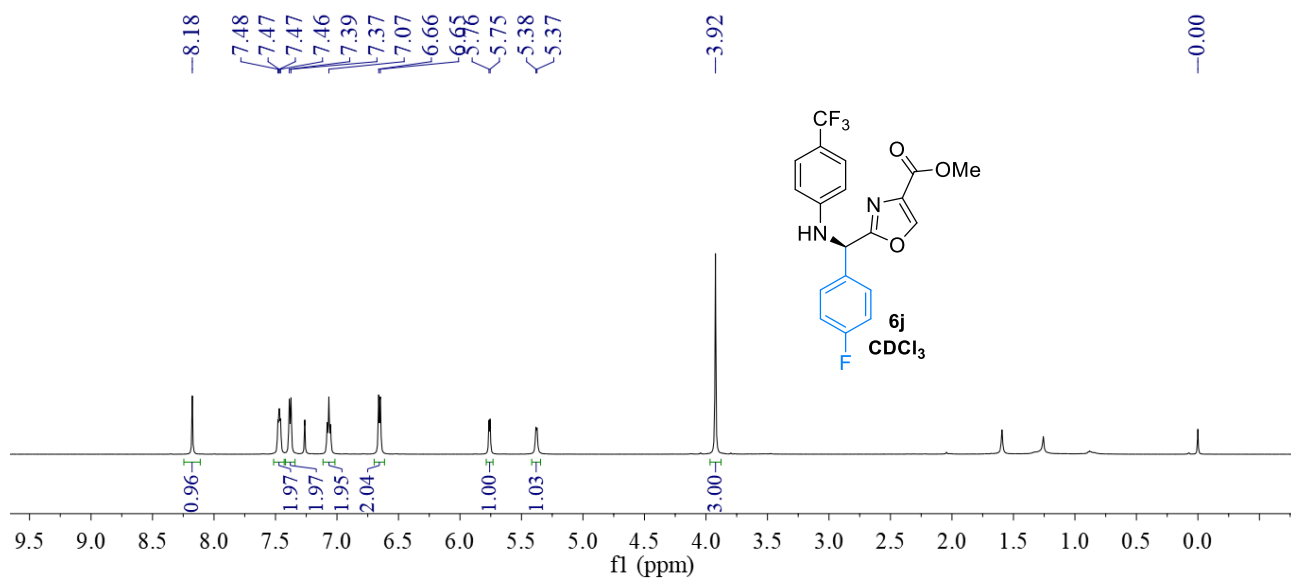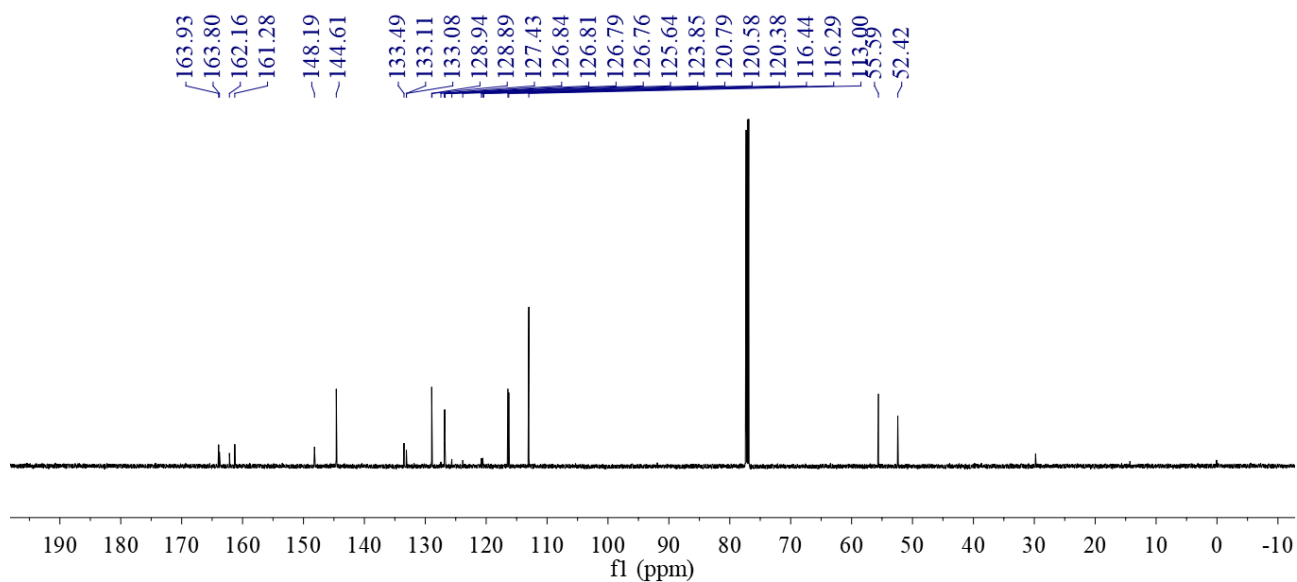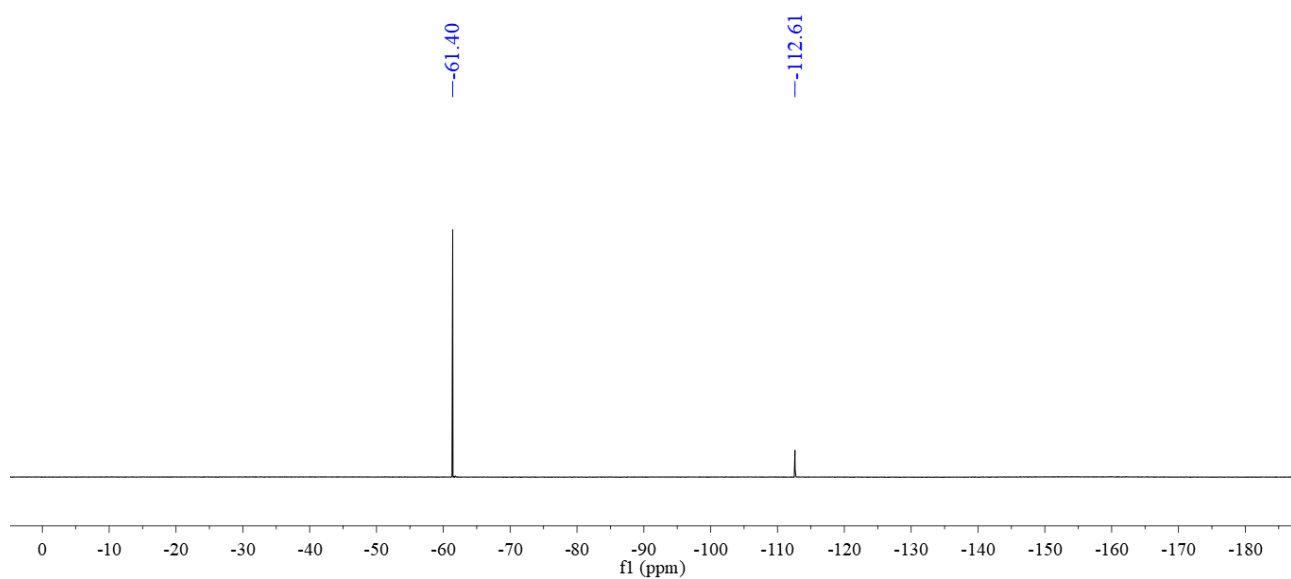

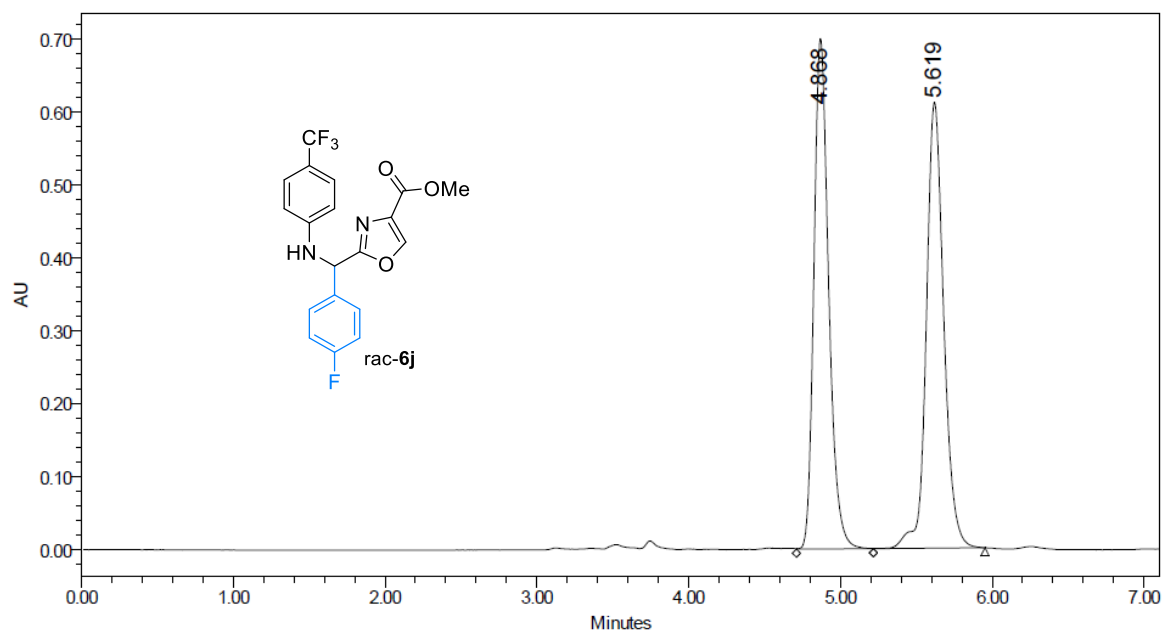

|   | RT<br>(min) | Peak<br>Type | Area<br>( $\mu\text{V}\cdot\text{sec}$ ) | % Area | Height<br>( $\mu\text{V}$ ) | % Height | Integration<br>Type | Points<br>Across Peak | Start<br>Time<br>(min) | End<br>Time<br>(min) |
|---|-------------|--------------|------------------------------------------|--------|-----------------------------|----------|---------------------|-----------------------|------------------------|----------------------|
| 1 | 4.868       | Unknown      | 4733277                                  | 49.17  | 699925                      | 53.36    | VV                  | 304                   | 4.710                  | 5.217                |
| 2 | 5.619       | Unknown      | 4893203                                  | 50.83  | 611701                      | 46.64    | VB                  | 441                   | 5.217                  | 5.952                |

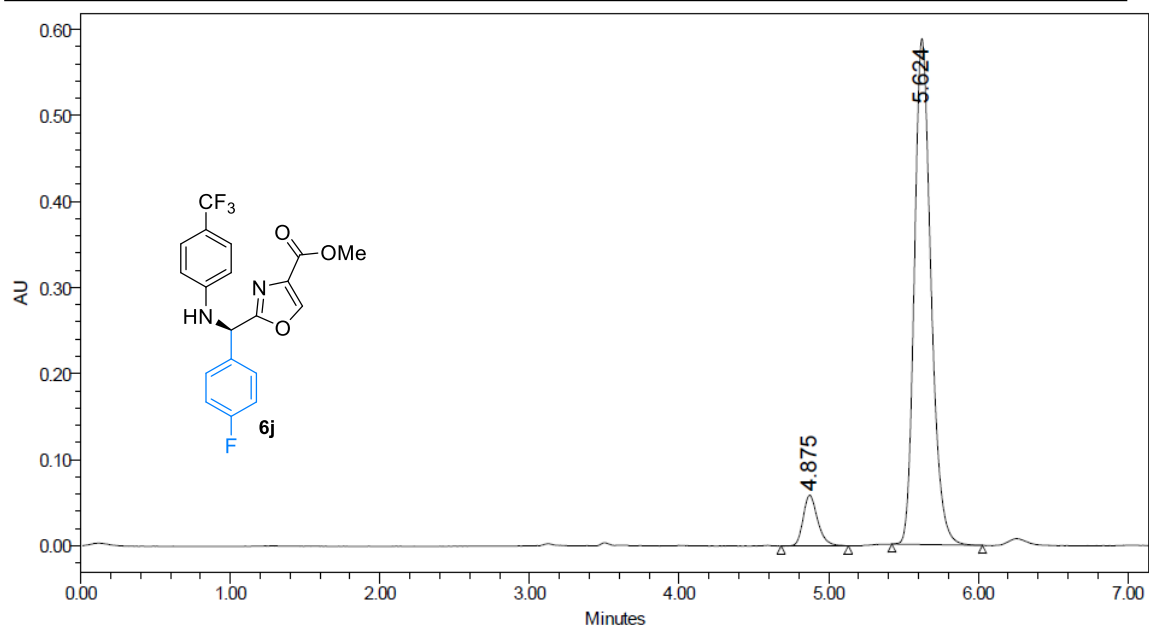

|   | RT<br>(min) | Peak<br>Type | Area<br>( $\mu\text{V}\cdot\text{sec}$ ) | % Area | Height<br>( $\mu\text{V}$ ) | % Height | Integration<br>Type | Points<br>Across Peak | Start<br>Time<br>(min) | End<br>Time<br>(min) |
|---|-------------|--------------|------------------------------------------|--------|-----------------------------|----------|---------------------|-----------------------|------------------------|----------------------|
| 1 | 4.875       | Unknown      | 393590                                   | 7.99   | 58793                       | 9.09     | bb                  | 269                   | 4.683                  | 5.132                |
| 2 | 5.624       | Unknown      | 4530544                                  | 92.01  | 587767                      | 90.91    | bb                  | 363                   | 5.423                  | 6.028                |



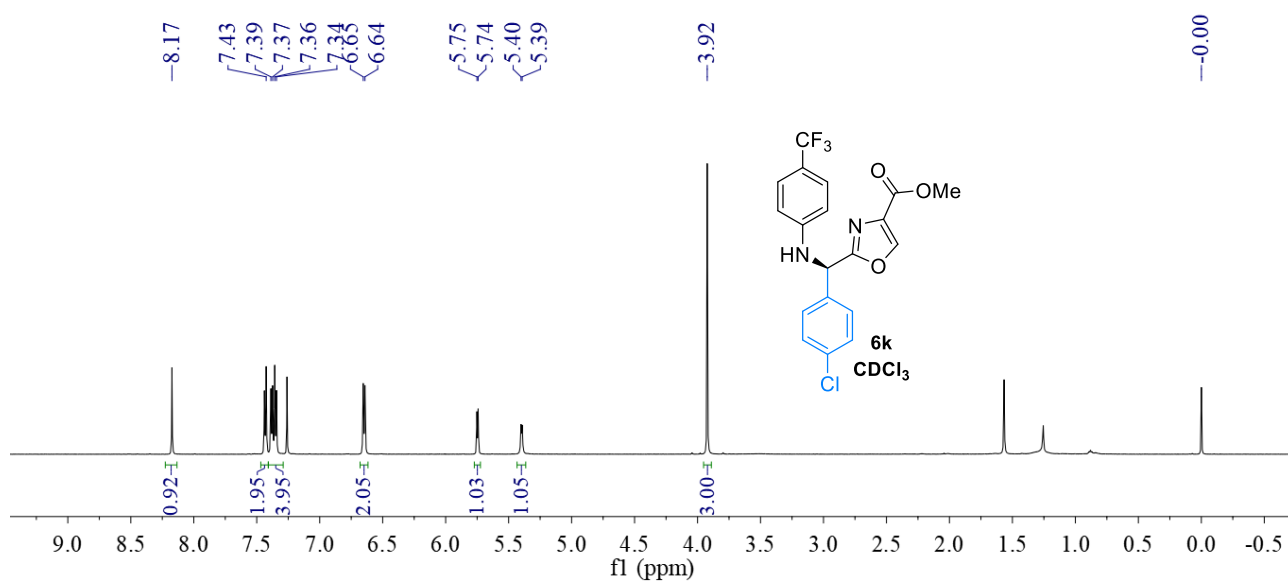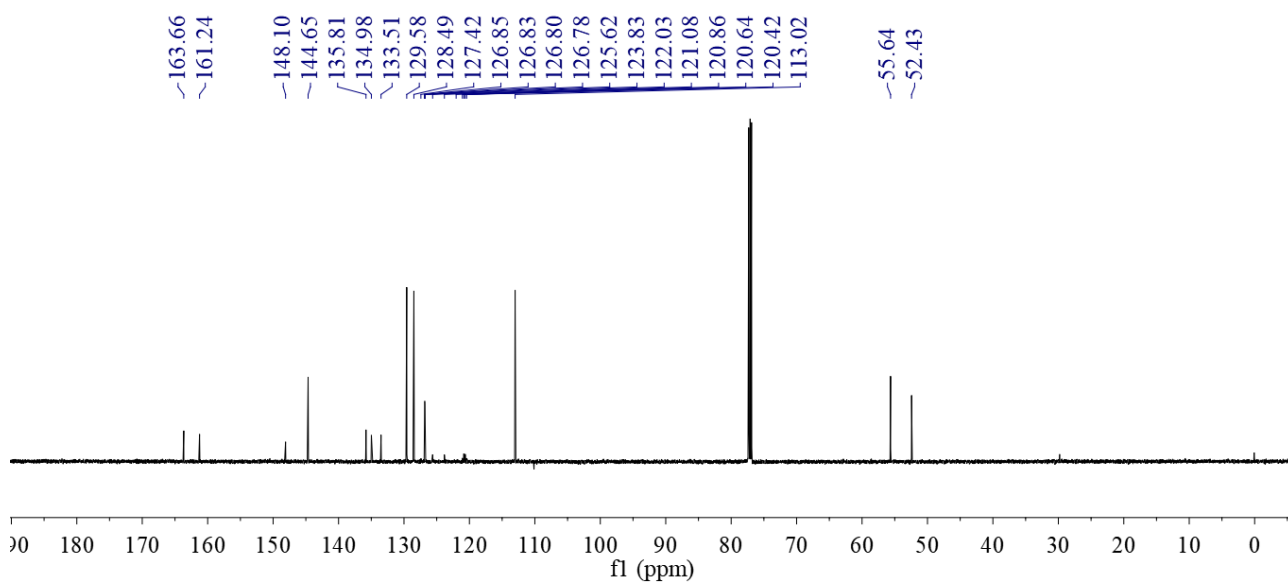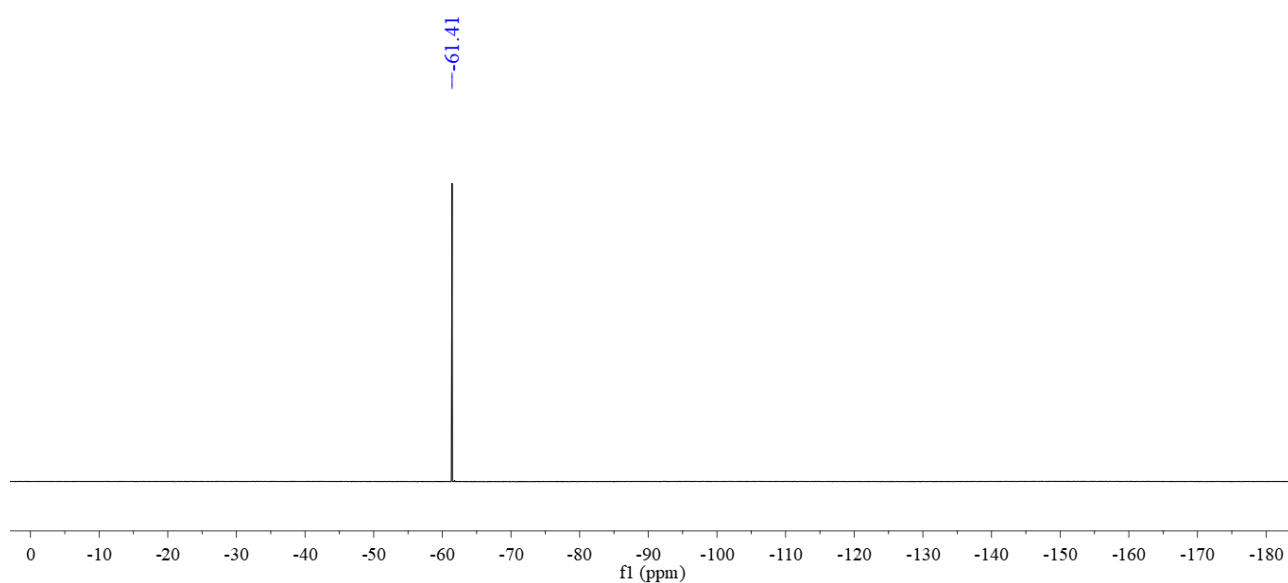

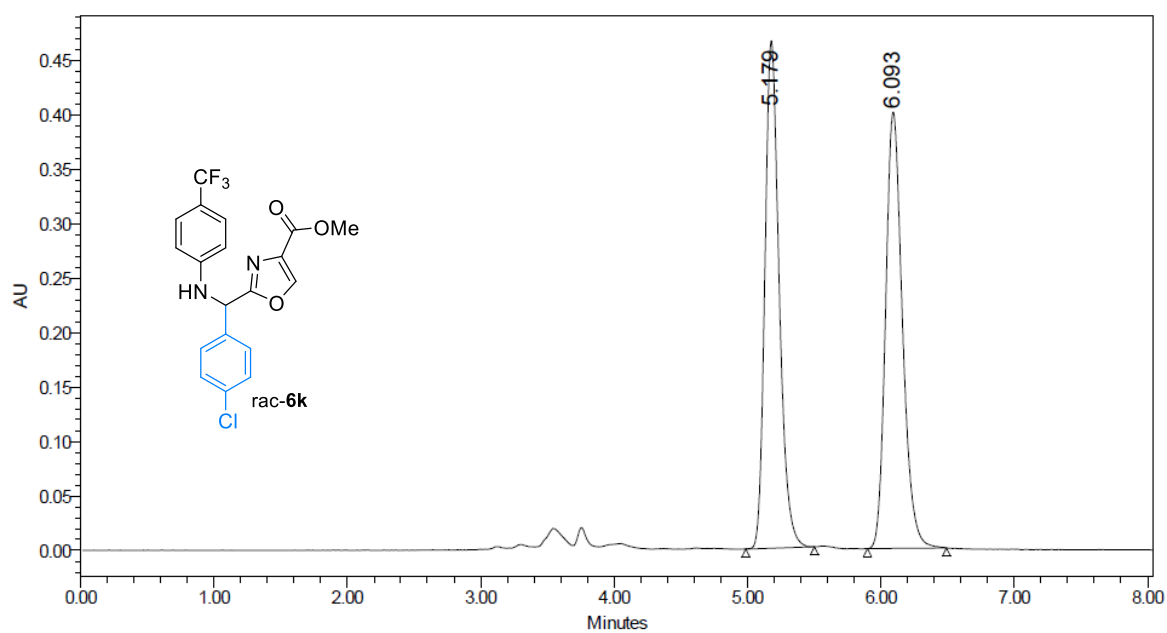

|   | RT<br>(min) | Peak<br>Type | Area<br>( $\mu\text{V}\cdot\text{sec}$ ) | % Area | Height<br>( $\mu\text{V}$ ) | % Height | Integration<br>Type | Points<br>Across Peak | Start<br>Time<br>(min) | End<br>Time<br>(min) |
|---|-------------|--------------|------------------------------------------|--------|-----------------------------|----------|---------------------|-----------------------|------------------------|----------------------|
| 1 | 5.179       | Unknown      | 3468611                                  | 49.68  | 465859                      | 53.77    | BB                  | 308                   | 4.988                  | 5.502                |
| 2 | 6.093       | Unknown      | 3512908                                  | 50.32  | 400592                      | 46.23    | BB                  | 355                   | 5.900                  | 6.492                |

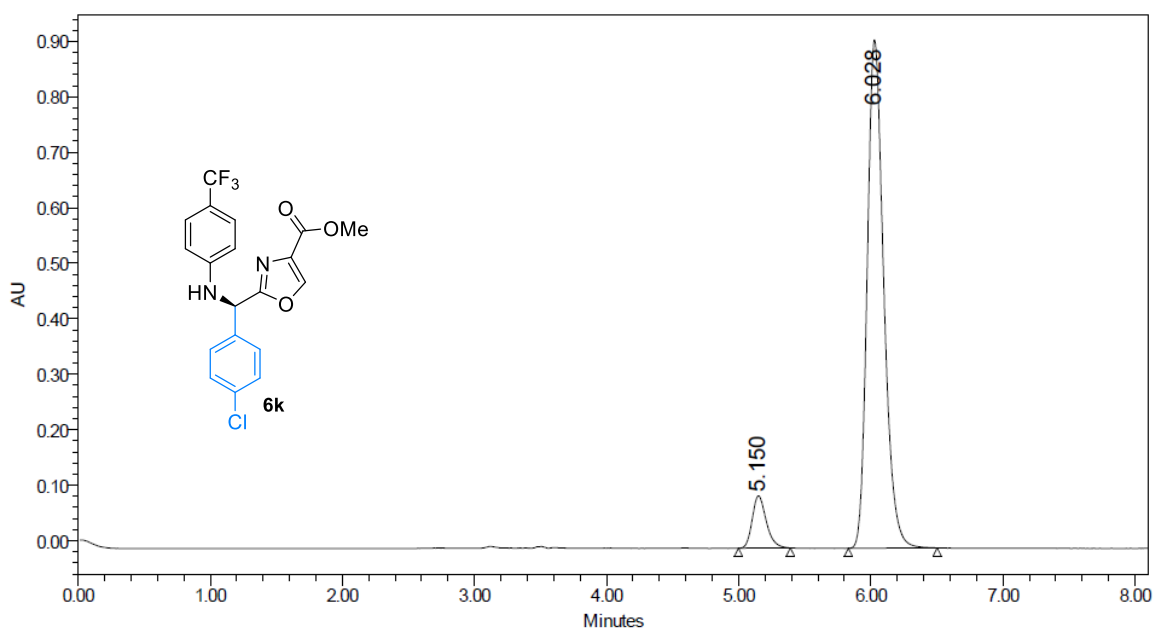

|   | RT<br>(min) | Peak<br>Type | Area<br>( $\mu\text{V}\cdot\text{sec}$ ) | % Area | Height<br>( $\mu\text{V}$ ) | % Height | Integration<br>Type | Points<br>Across Peak | Start<br>Time<br>(min) | End<br>Time<br>(min) |
|---|-------------|--------------|------------------------------------------|--------|-----------------------------|----------|---------------------|-----------------------|------------------------|----------------------|
| 1 | 5.150       | Unknown      | 691992                                   | 8.00   | 94181                       | 9.32     | bb                  | 236                   | 4.998                  | 5.392                |
| 2 | 6.028       | Unknown      | 7954645                                  | 92.00  | 915912                      | 90.68    | BB                  | 403                   | 5.830                  | 6.502                |

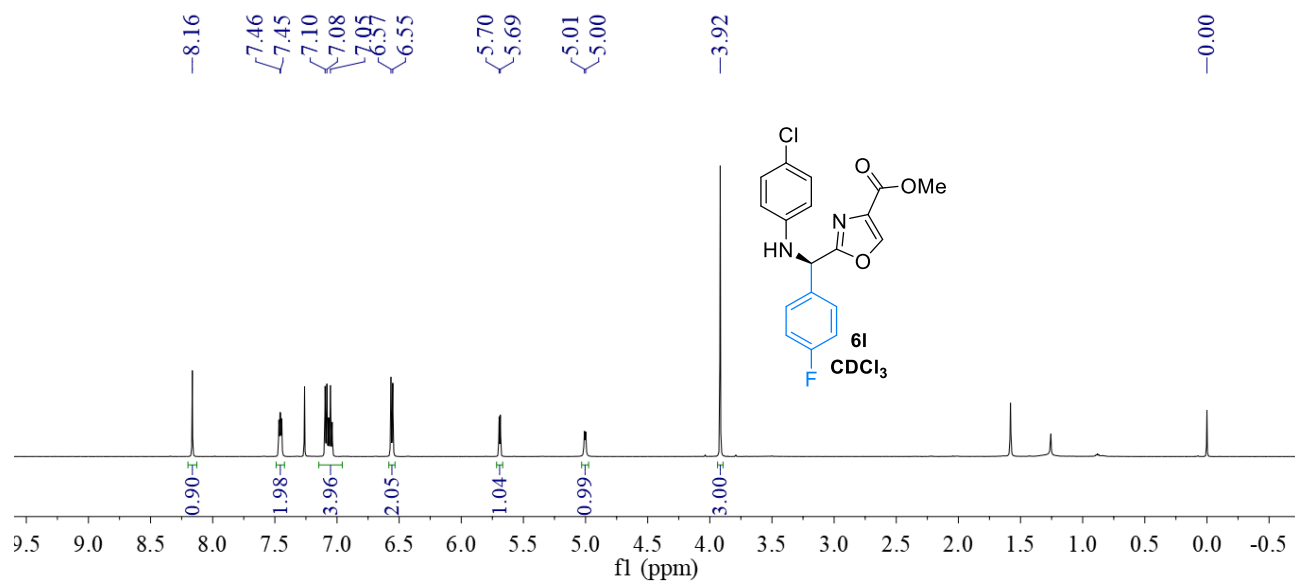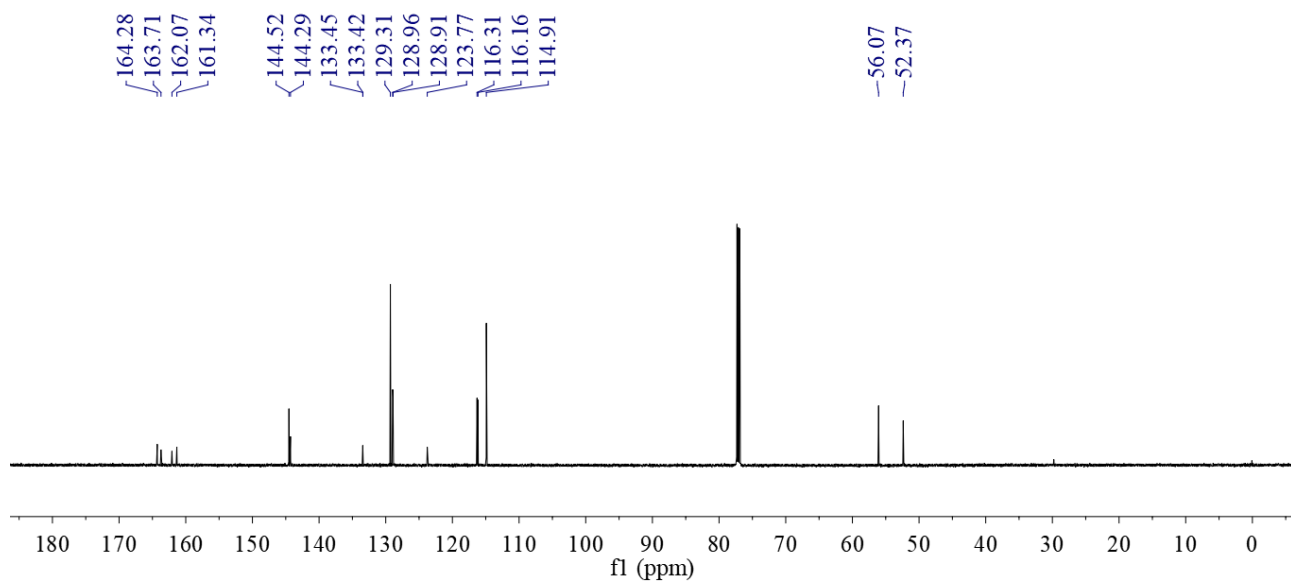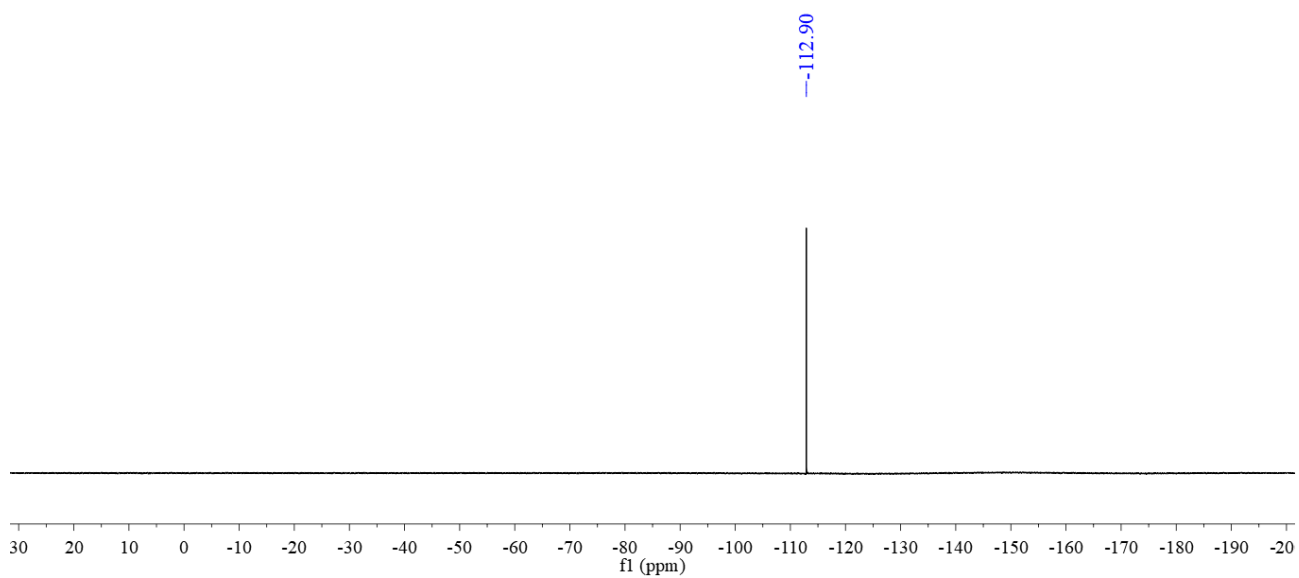

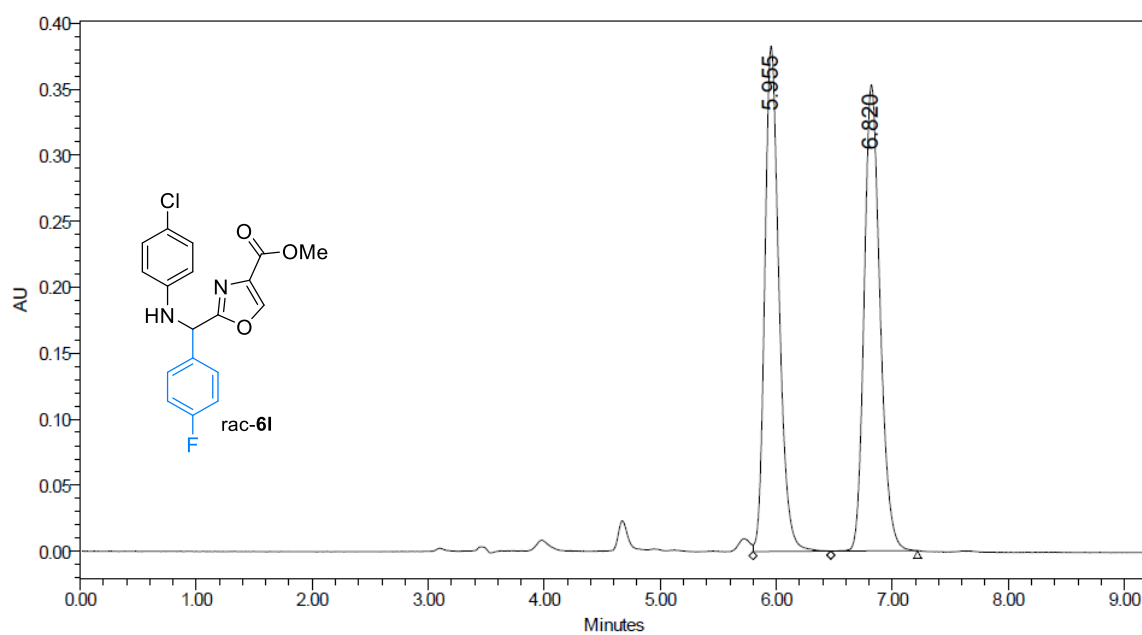

|   | RT<br>(min) | Peak<br>Type | Area<br>( $\mu\text{V}\cdot\text{sec}$ ) | % Area | Height<br>( $\mu\text{V}$ ) | % Height | Integration<br>Type | Points<br>Across Peak | Start<br>Time<br>(min) | End<br>Time<br>(min) |
|---|-------------|--------------|------------------------------------------|--------|-----------------------------|----------|---------------------|-----------------------|------------------------|----------------------|
| 1 | 5.955       | Unknown      | 3263993                                  | 49.27  | 382855                      | 52.02    | VV                  | 403                   | 5.798                  | 6.470                |
| 2 | 6.820       | Unknown      | 3360158                                  | 50.73  | 353138                      | 47.98    | VB                  | 448                   | 6.470                  | 7.217                |

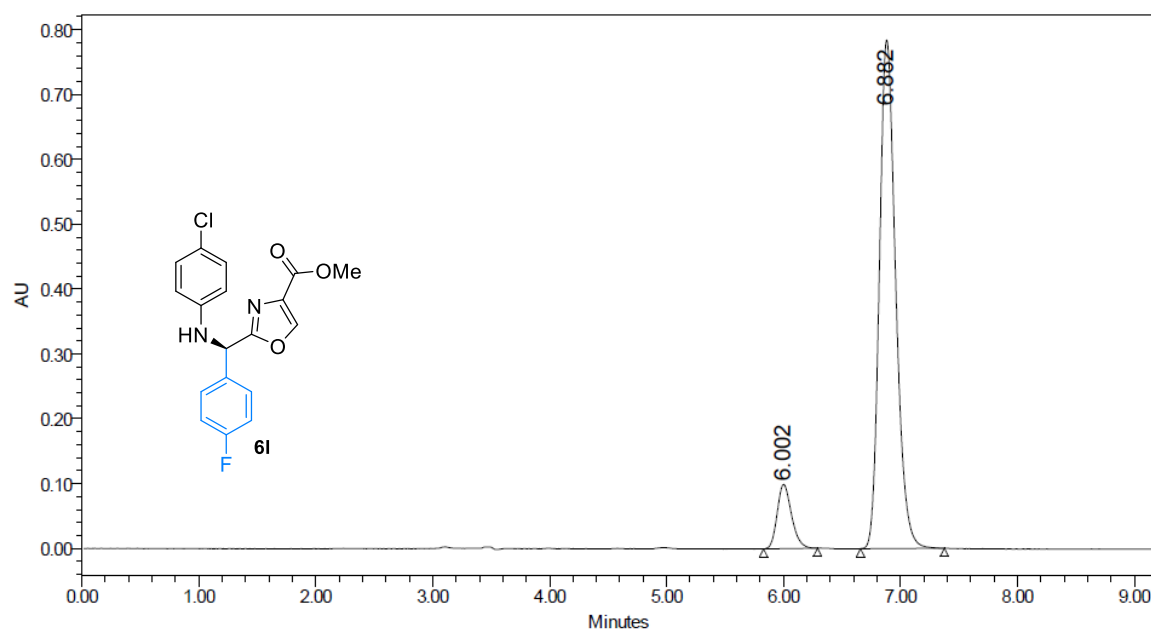

|   | RT<br>(min) | Peak<br>Type | Area<br>( $\mu\text{V}\cdot\text{sec}$ ) | % Area | Height<br>( $\mu\text{V}$ ) | % Height | Integration<br>Type | Points<br>Across Peak | Start<br>Time<br>(min) | End<br>Time<br>(min) |
|---|-------------|--------------|------------------------------------------|--------|-----------------------------|----------|---------------------|-----------------------|------------------------|----------------------|
| 1 | 6.002       | Unknown      | 841452                                   | 9.99   | 98748                       | 11.19    | BB                  | 277                   | 5.830                  | 6.292                |
| 2 | 6.882       | Unknown      | 7580106                                  | 90.01  | 784056                      | 88.81    | BB                  | 431                   | 6.658                  | 7.377                |

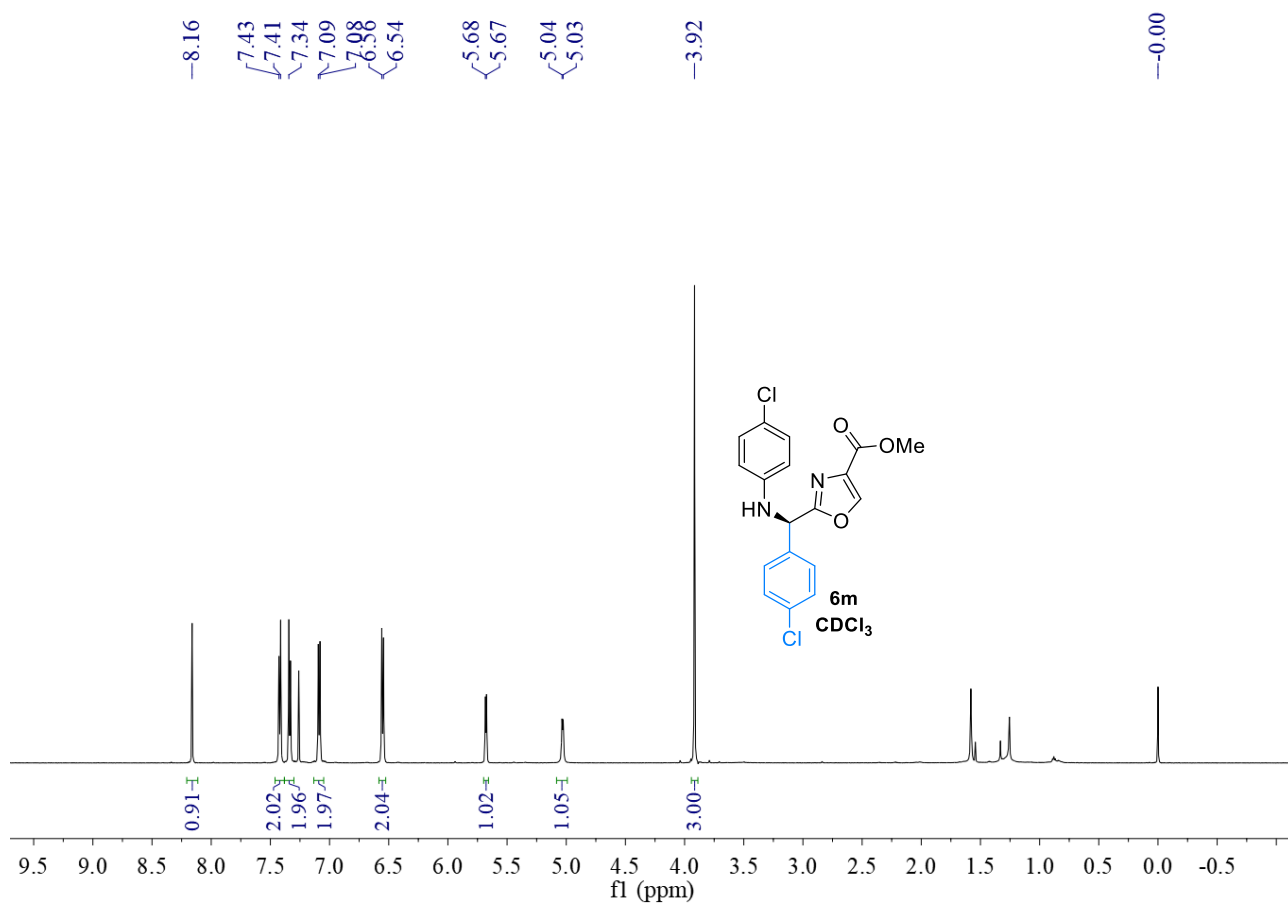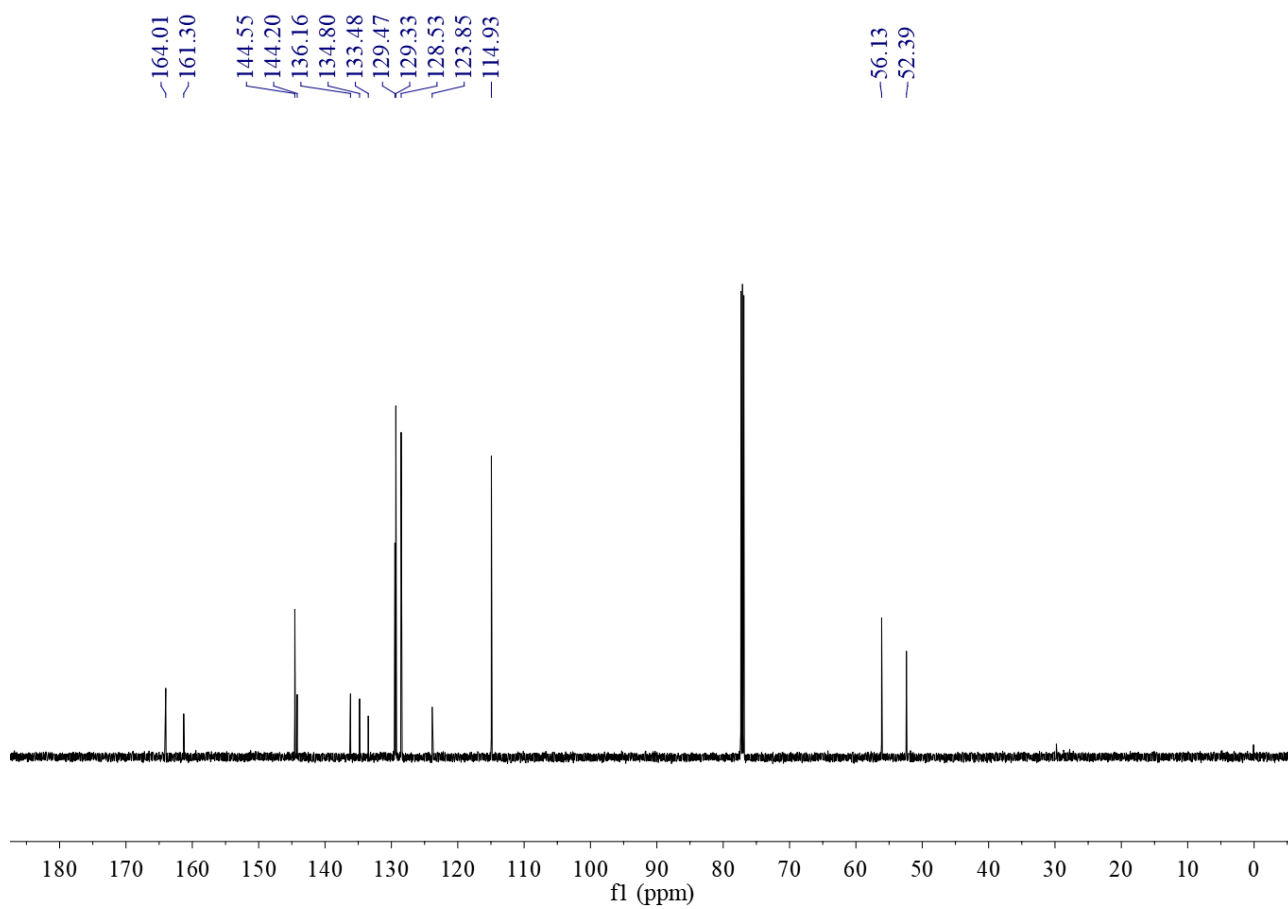

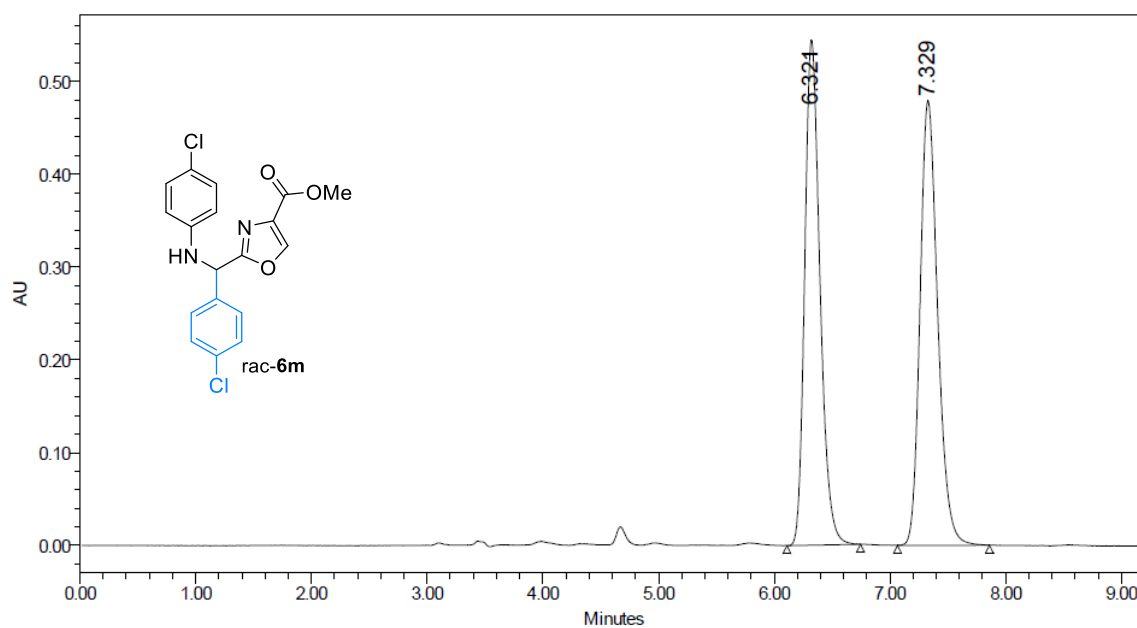

|   | RT<br>(min) | Peak<br>Type | Area<br>( $\mu\text{V}\cdot\text{sec}$ ) | % Area | Height<br>( $\mu\text{V}$ ) | % Height | Integration<br>Type | Points<br>Across Peak | Start<br>Time<br>(min) | End<br>Time<br>(min) |
|---|-------------|--------------|------------------------------------------|--------|-----------------------------|----------|---------------------|-----------------------|------------------------|----------------------|
| 1 | 6.321       | Unknown      | 4990044                                  | 49.57  | 544579                      | 53.20    | BB                  | 381                   | 6.110                  | 6.745                |
| 2 | 7.329       | Unknown      | 5075954                                  | 50.43  | 479111                      | 46.80    | BB                  | 477                   | 7.065                  | 7.860                |

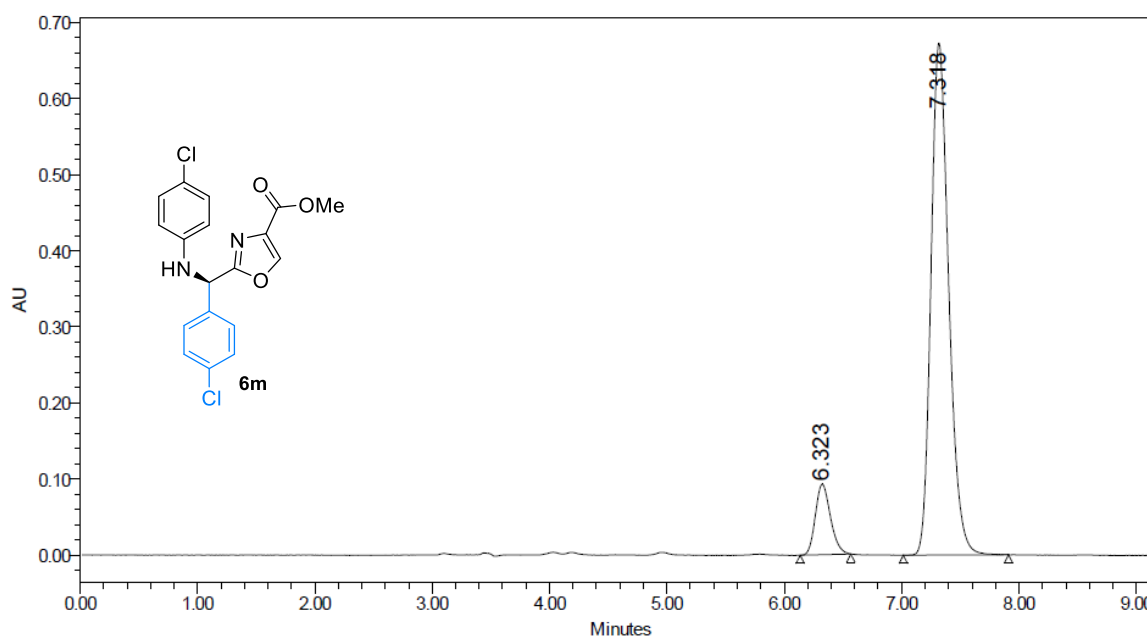

|   | RT<br>(min) | Peak<br>Type | Area<br>( $\mu\text{V}\cdot\text{sec}$ ) | % Area | Height<br>( $\mu\text{V}$ ) | % Height | Integration<br>Type | Points<br>Across Peak | Start<br>Time<br>(min) | End<br>Time<br>(min) |
|---|-------------|--------------|------------------------------------------|--------|-----------------------------|----------|---------------------|-----------------------|------------------------|----------------------|
| 1 | 6.323       | Unknown      | 831178                                   | 10.54  | 92735                       | 12.11    | bb                  | 259                   | 6.137                  | 6.568                |
| 2 | 7.318       | Unknown      | 7055228                                  | 89.46  | 672795                      | 87.89    | bb                  | 538                   | 7.015                  | 7.912                |

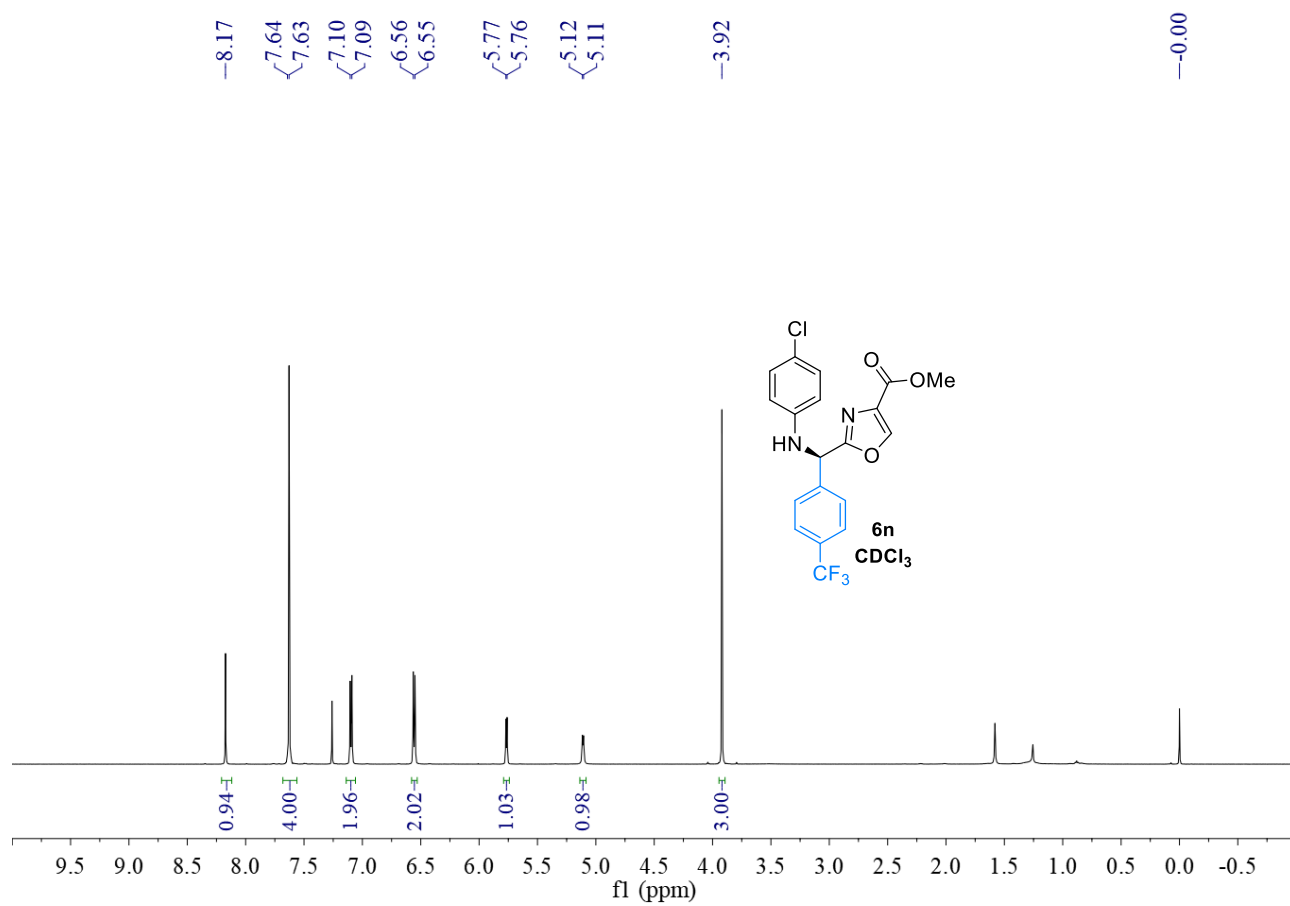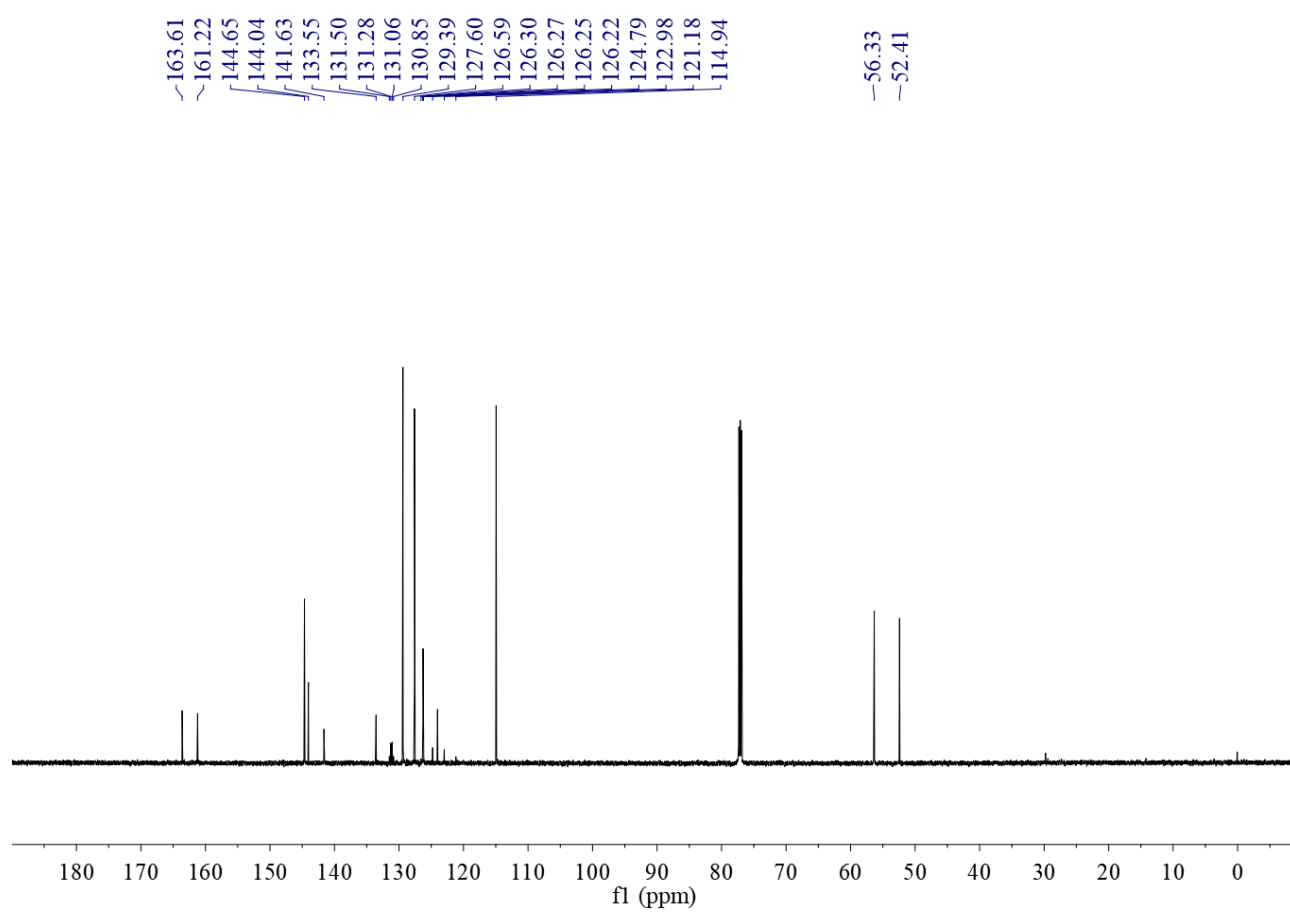

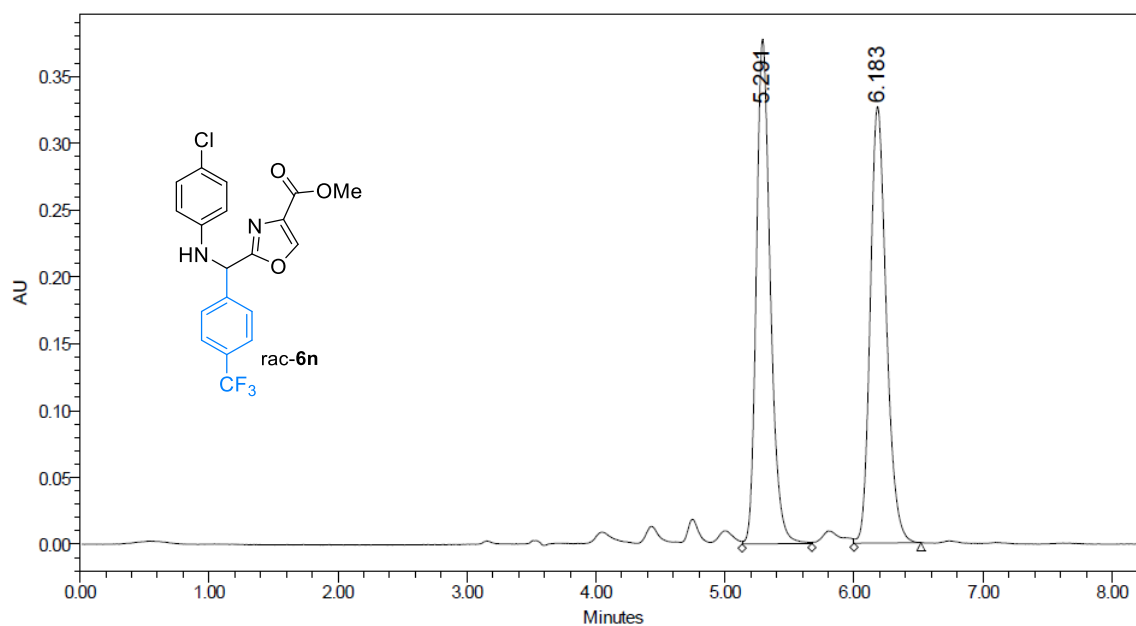

|   | RT<br>(min) | Peak<br>Type | Area<br>( $\mu\text{V}\cdot\text{sec}$ ) | % Area | Height<br>( $\mu\text{V}$ ) | % Height | Integration<br>Type | Points<br>Across Peak | Start<br>Time<br>(min) | End<br>Time<br>(min) |
|---|-------------|--------------|------------------------------------------|--------|-----------------------------|----------|---------------------|-----------------------|------------------------|----------------------|
| 1 | 5.291       | Unknown      | 2846615                                  | 50.14  | 377667                      | 53.63    | VV                  | 324                   | 5.133                  | 5.673                |
| 2 | 6.183       | Unknown      | 2831047                                  | 49.86  | 326601                      | 46.37    | VB                  | 311                   | 6.000                  | 6.518                |

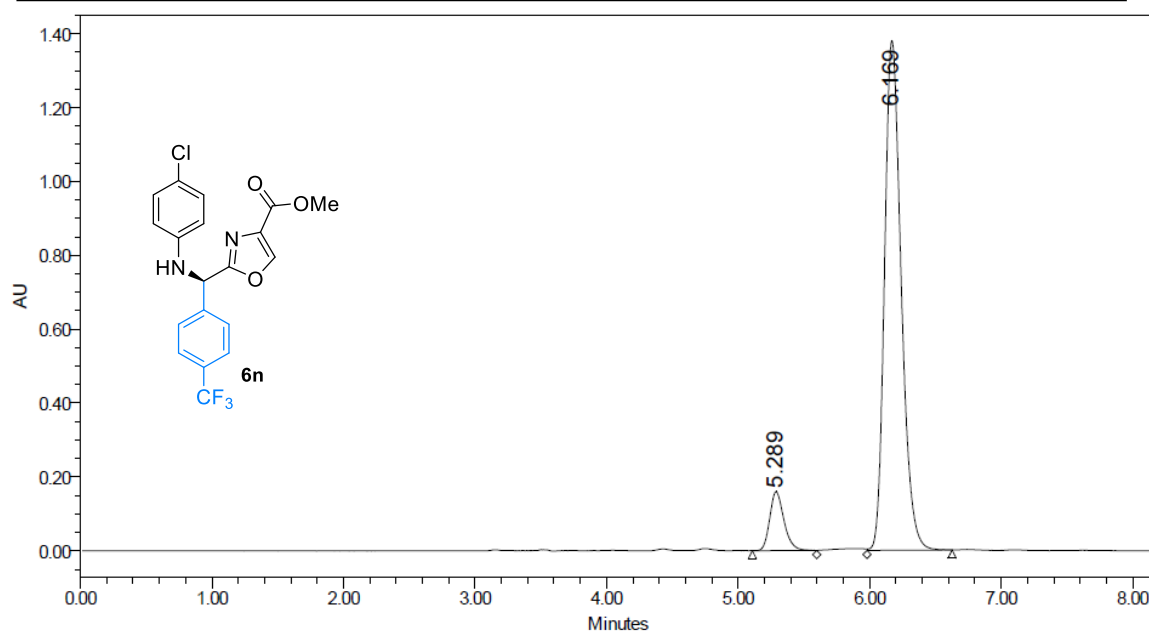

|   | RT<br>(min) | Peak<br>Type | Area<br>( $\mu\text{V}\cdot\text{sec}$ ) | % Area | Height<br>( $\mu\text{V}$ ) | % Height | Integration<br>Type | Points<br>Across Peak | Start<br>Time<br>(min) | End<br>Time<br>(min) |
|---|-------------|--------------|------------------------------------------|--------|-----------------------------|----------|---------------------|-----------------------|------------------------|----------------------|
| 1 | 5.289       | Unknown      | 1197102                                  | 8.97   | 159485                      | 10.36    | BV                  | 294                   | 5.108                  | 5.598                |
| 2 | 6.169       | Unknown      | 12151204                                 | 91.03  | 1380141                     | 89.64    | VB                  | 388                   | 5.980                  | 6.627                |



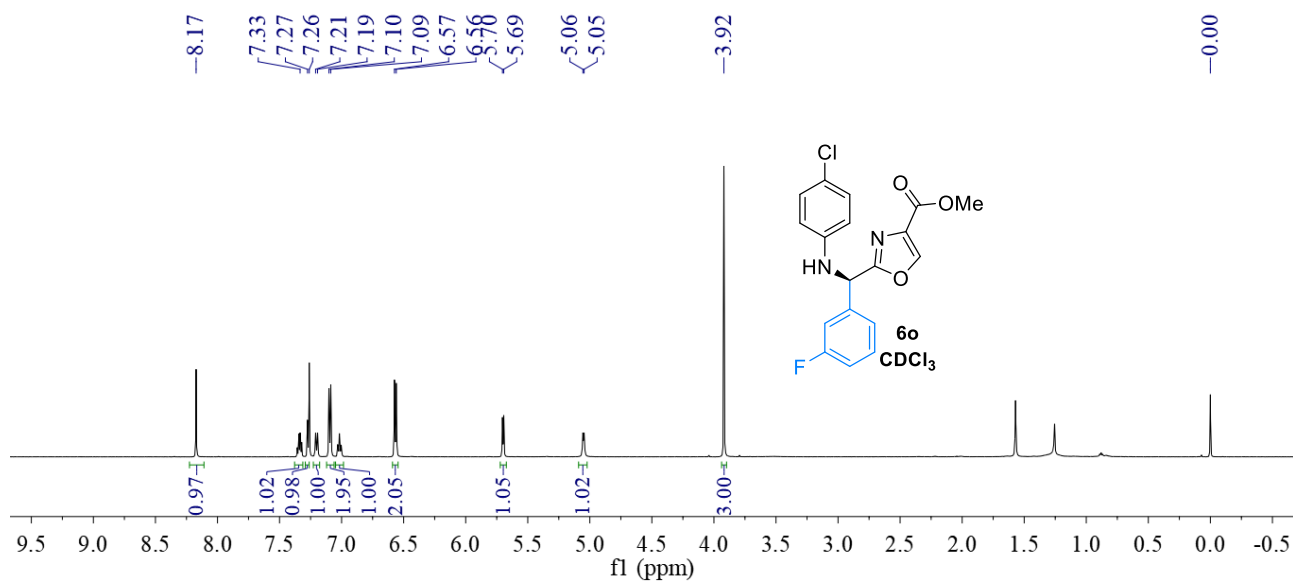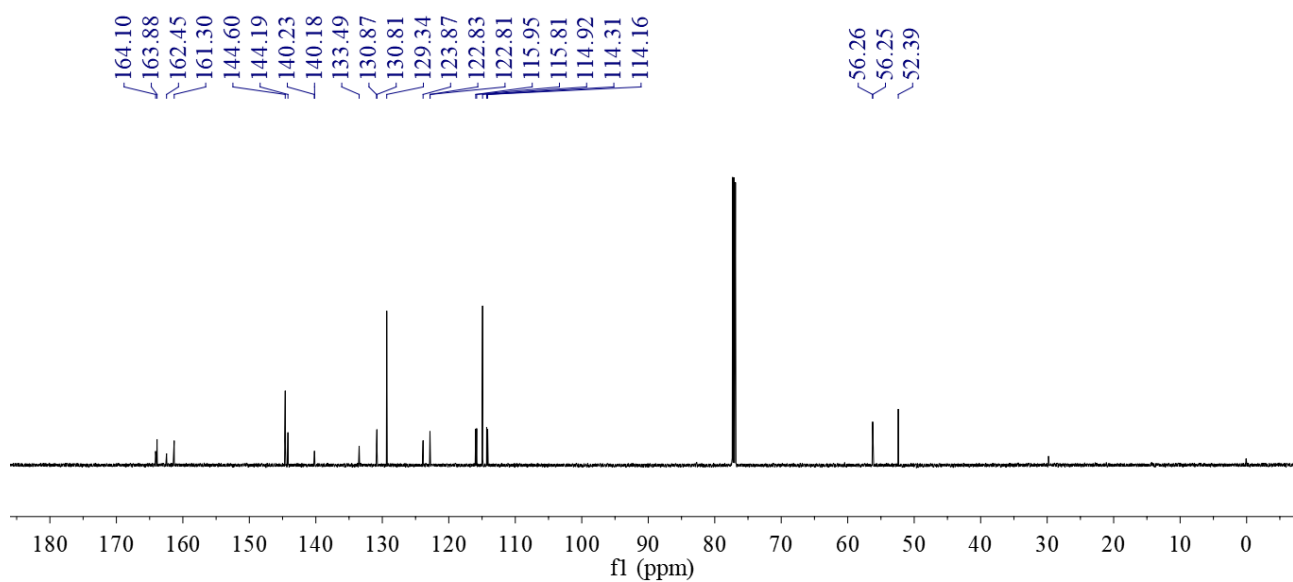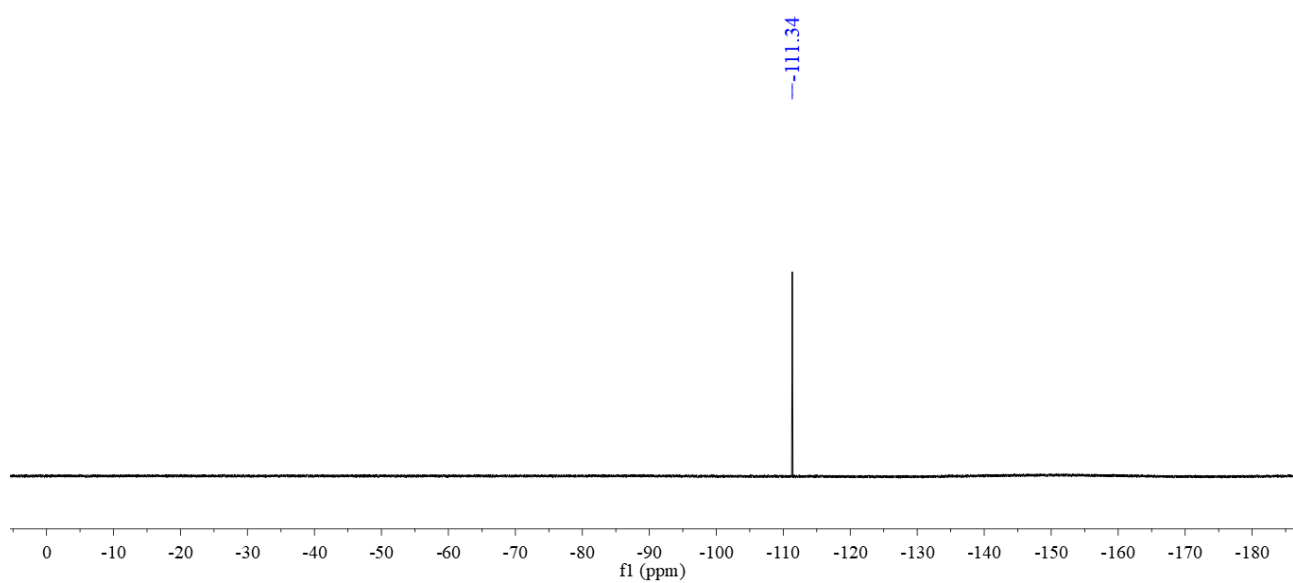

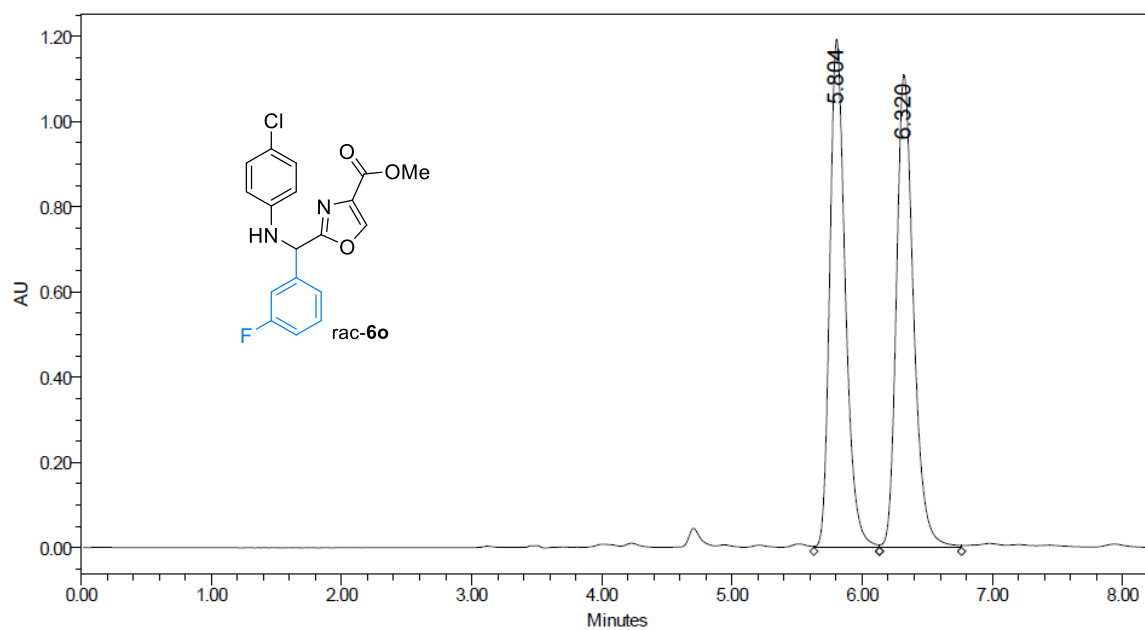

|   | RT (min) | Peak Type | Area (μV*sec) | % Area | Height (μV) | % Height | Integration Type | Points Across Peak | Start Time (min) | End Time (min) |
|---|----------|-----------|---------------|--------|-------------|----------|------------------|--------------------|------------------|----------------|
| 1 | 5.804    | Unknown   | 9891739       | 49.44  | 1191975     | 51.80    | VV               | 303                | 5.628            | 6.133          |
| 2 | 6.320    | Unknown   | 10117214      | 50.56  | 1109172     | 48.20    | VV               | 378                | 6.133            | 6.763          |

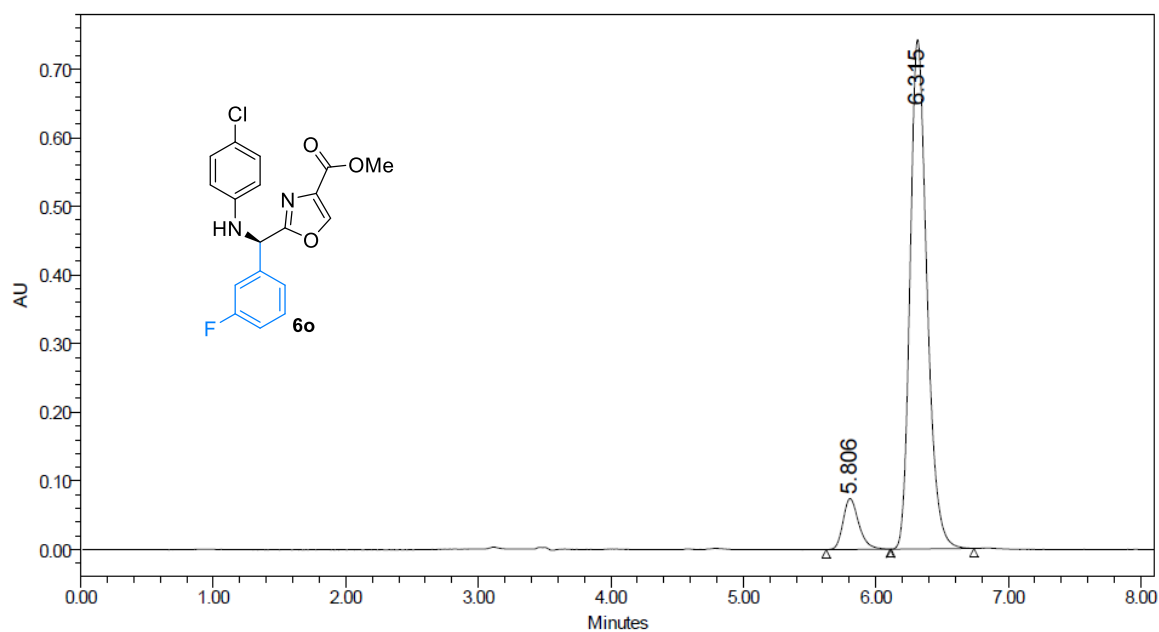

|   | RT (min) | Peak Type | Area (μV*sec) | % Area | Height (μV) | % Height | Integration Type | Points Across Peak | Start Time (min) | End Time (min) |
|---|----------|-----------|---------------|--------|-------------|----------|------------------|--------------------|------------------|----------------|
| 1 | 5.806    | Unknown   | 610956        | 8.51   | 74102       | 9.08     | BB               | 290                | 5.625            | 6.108          |
| 2 | 6.315    | Unknown   | 6571600       | 91.49  | 742033      | 90.92    | BB               | 375                | 6.115            | 6.740          |

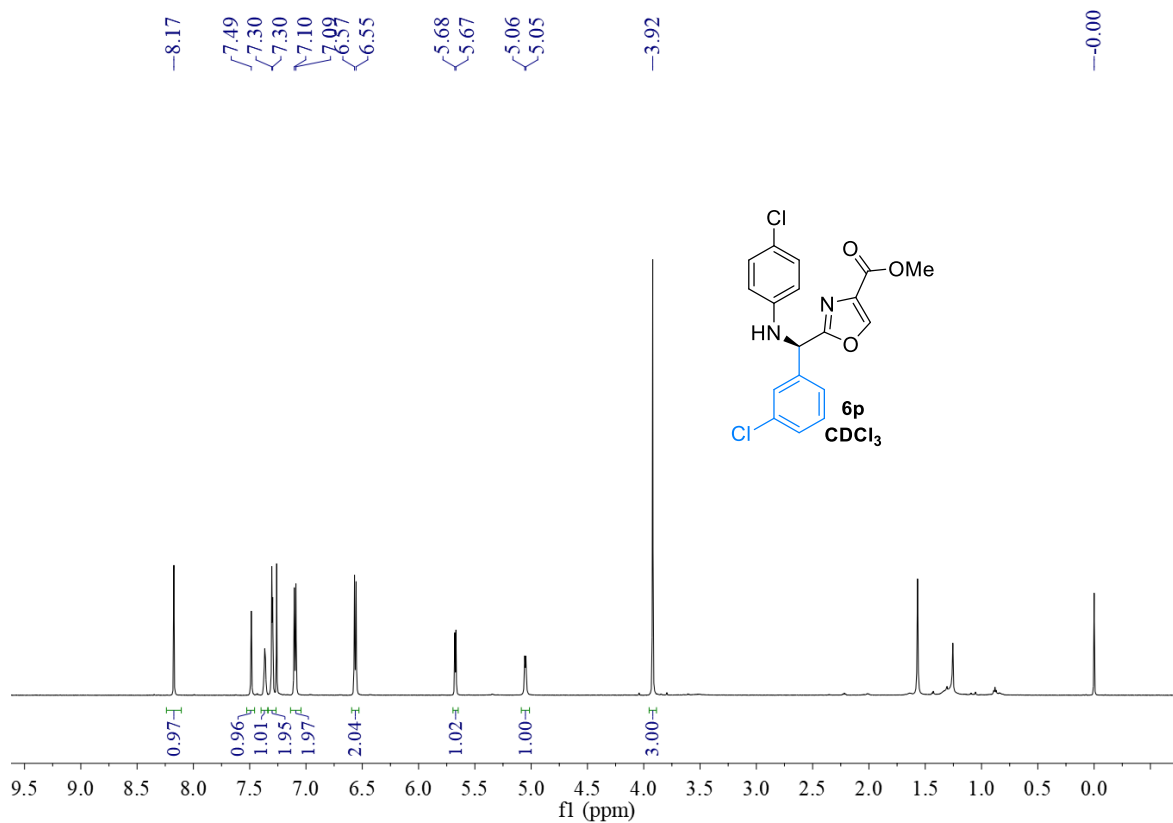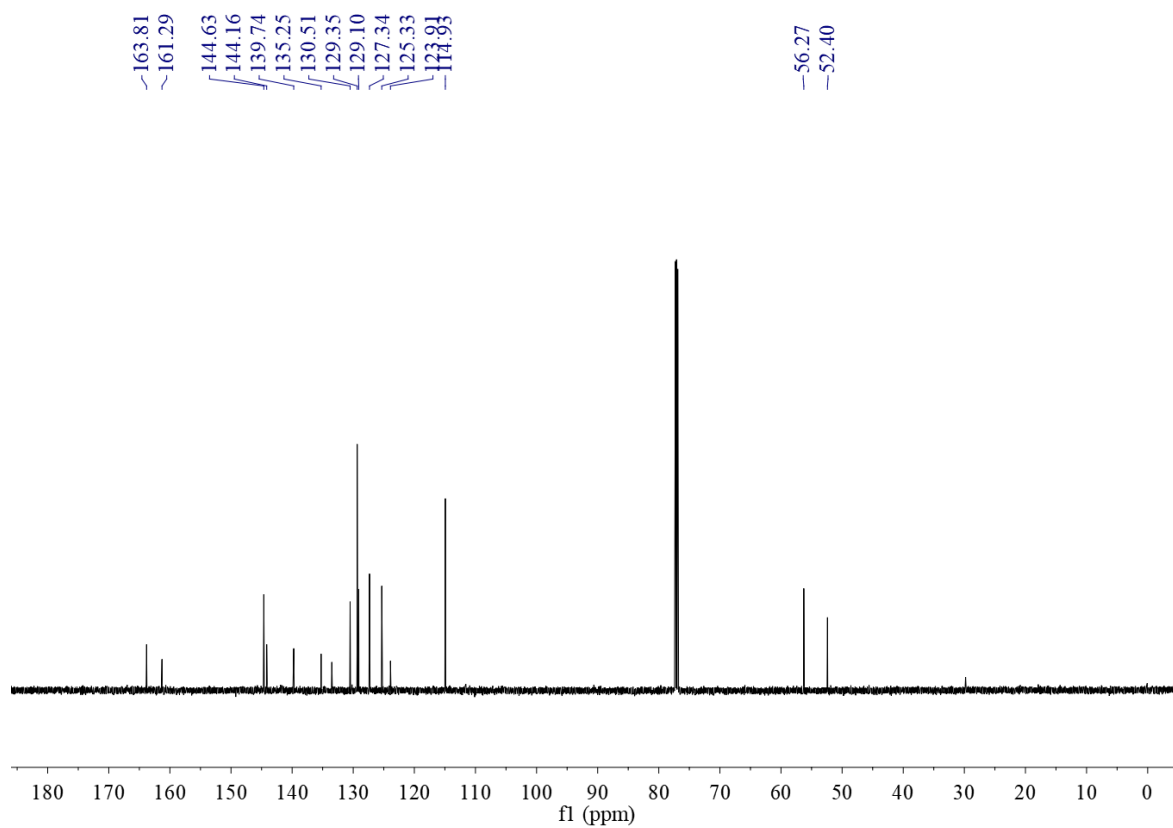

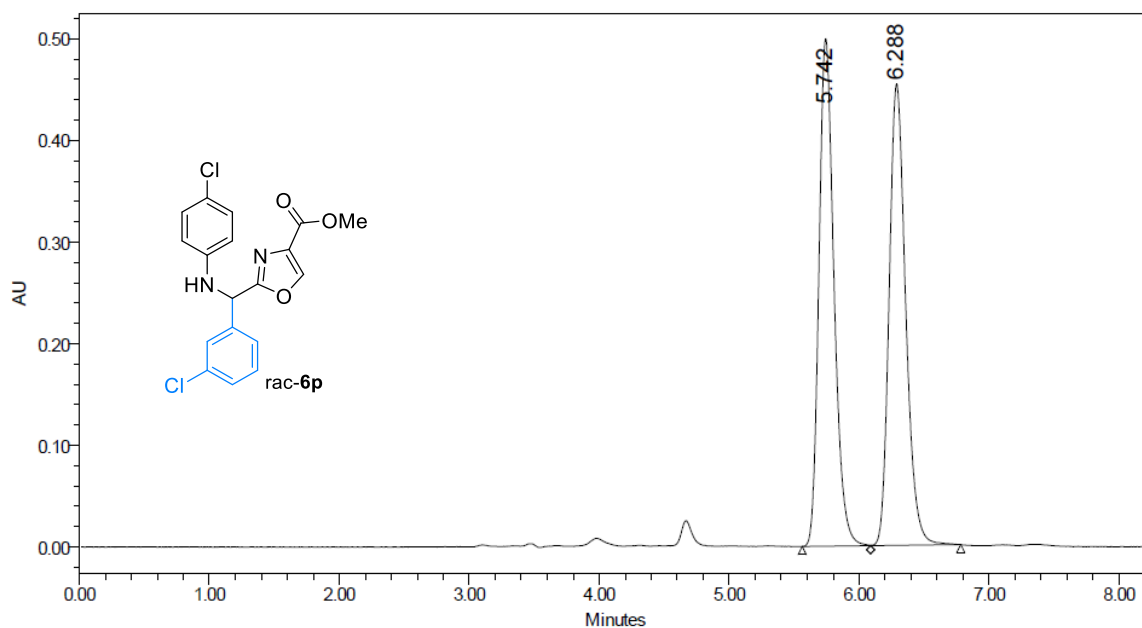

|   | RT<br>(min) | Peak<br>Type | Area<br>( $\mu\text{V}\cdot\text{sec}$ ) | % Area | Height<br>( $\mu\text{V}$ ) | % Height | Integration<br>Type | Points<br>Across Peak | Start<br>Time<br>(min) | End<br>Time<br>(min) |
|---|-------------|--------------|------------------------------------------|--------|-----------------------------|----------|---------------------|-----------------------|------------------------|----------------------|
| 1 | 5.742       | Unknown      | 4021552                                  | 50.03  | 499718                      | 52.39    | BV                  | 316                   | 5.562                  | 6.088                |
| 2 | 6.288       | Unknown      | 4016528                                  | 49.97  | 454095                      | 47.61    | VB                  | 416                   | 6.088                  | 6.782                |

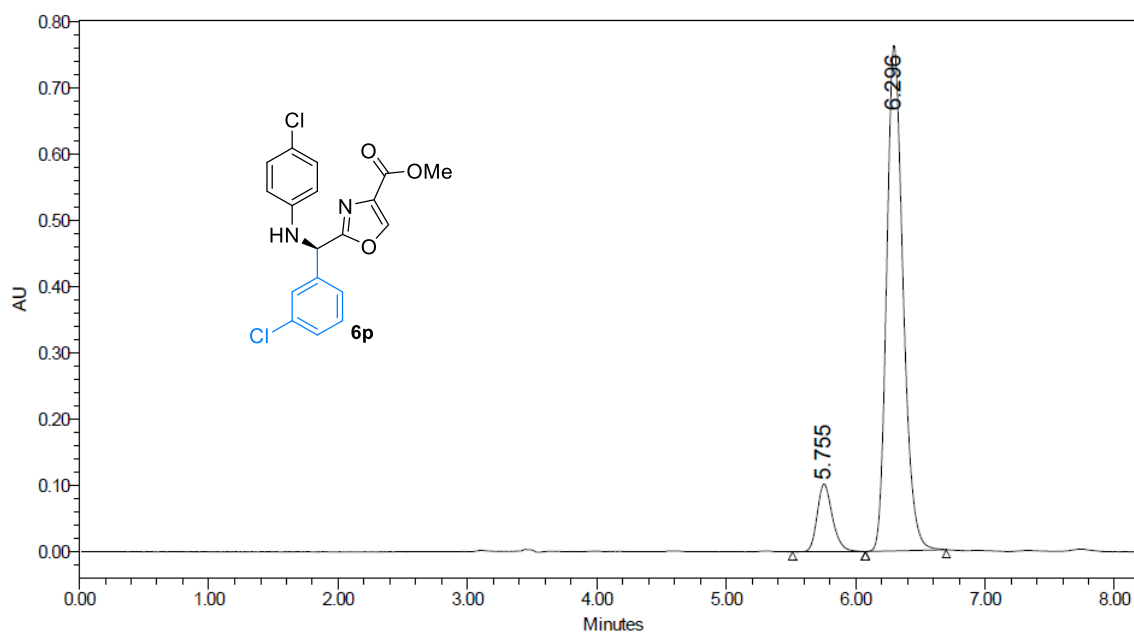

|   | RT<br>(min) | Peak<br>Type | Area<br>( $\mu\text{V}\cdot\text{sec}$ ) | % Area | Height<br>( $\mu\text{V}$ ) | % Height | Integration<br>Type | Points<br>Across Peak | Start<br>Time<br>(min) | End<br>Time<br>(min) |
|---|-------------|--------------|------------------------------------------|--------|-----------------------------|----------|---------------------|-----------------------|------------------------|----------------------|
| 1 | 5.755       | Unknown      | 829514                                   | 10.95  | 101703                      | 11.77    | bb                  | 337                   | 5.512                  | 6.073                |
| 2 | 6.296       | Unknown      | 6747963                                  | 89.05  | 762477                      | 88.23    | Bb                  | 374                   | 6.077                  | 6.700                |

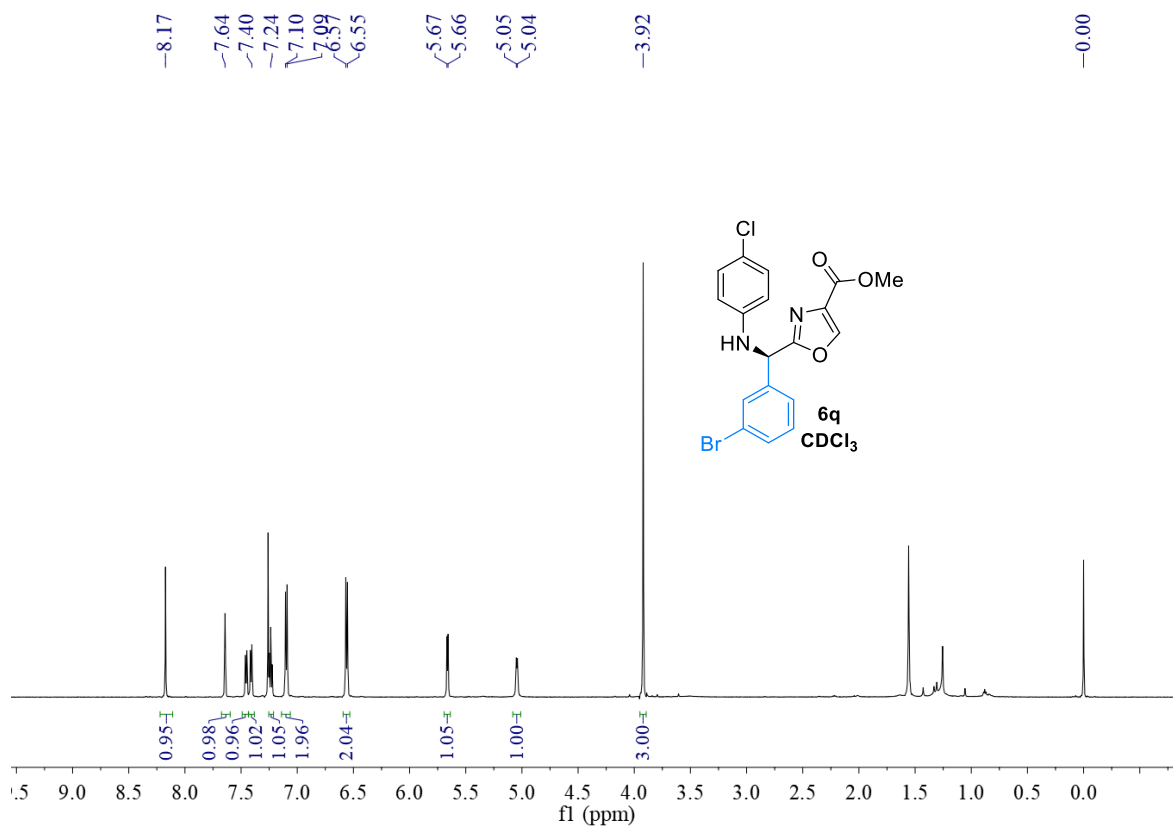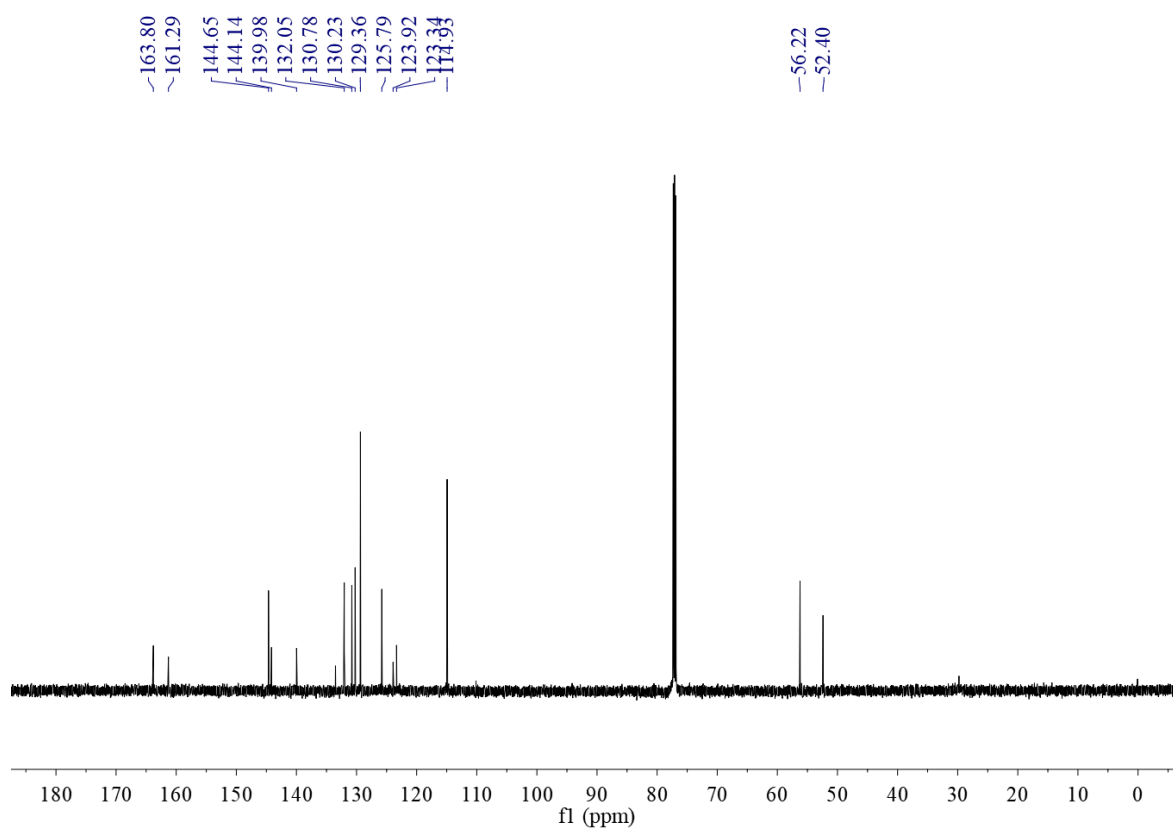

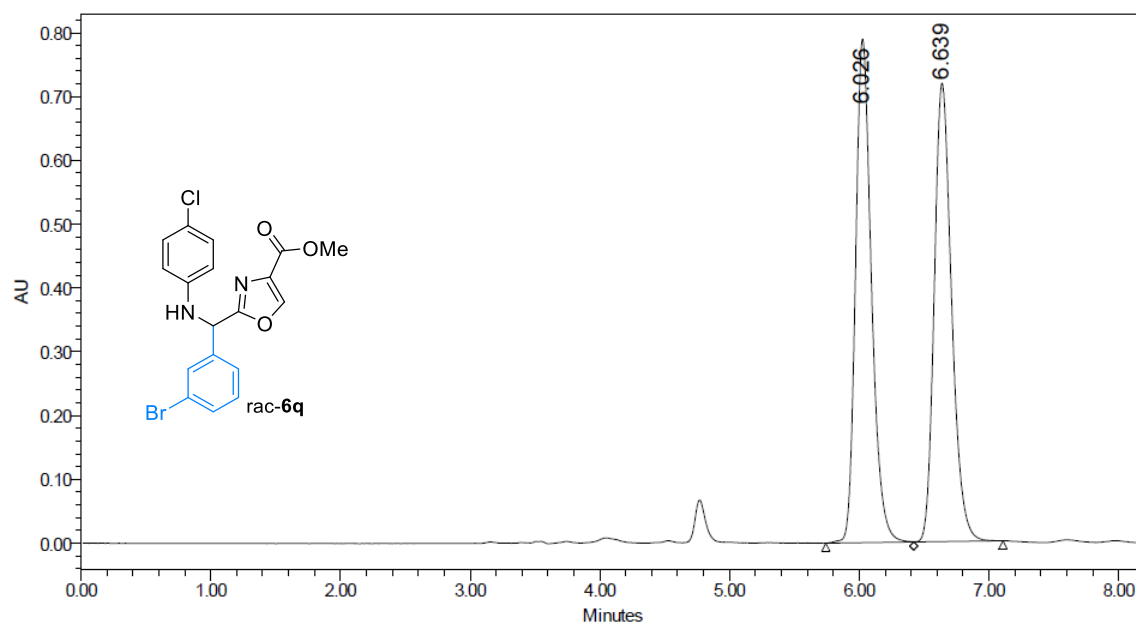

|   | RT (min) | Peak Type | Area (μV*sec) | % Area | Height (μV) | % Height | Integration Type | Points Across Peak | Start Time (min) | End Time (min) |
|---|----------|-----------|---------------|--------|-------------|----------|------------------|--------------------|------------------|----------------|
| 1 | 6.026    | Unknown   | 6741296       | 50.21  | 789436      | 52.35    | BV               | 406                | 5.743            | 6.420          |
| 2 | 6.639    | Unknown   | 6684189       | 49.79  | 718634      | 47.65    | VB               | 413                | 6.420            | 7.108          |

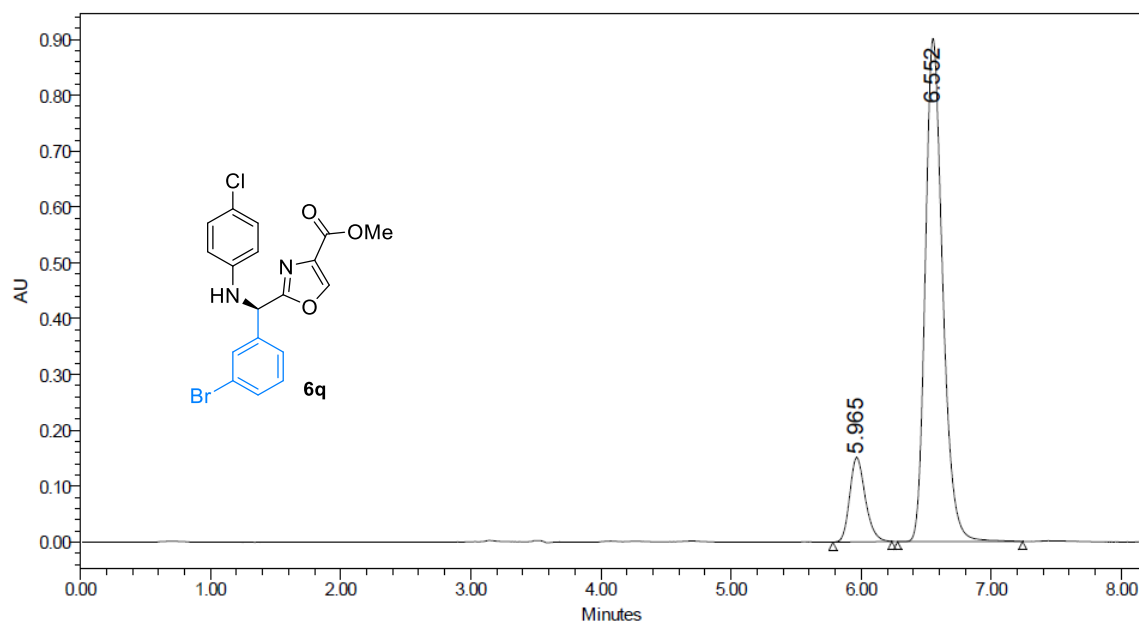

|   | RT (min) | Peak Type | Area (μV*sec) | % Area | Height (μV) | % Height | Integration Type | Points Across Peak | Start Time (min) | End Time (min) |
|---|----------|-----------|---------------|--------|-------------|----------|------------------|--------------------|------------------|----------------|
| 1 | 5.965    | Unknown   | 1260213       | 13.09  | 150831      | 14.34    | bb               | 272                | 5.783            | 6.237          |
| 2 | 6.552    | Unknown   | 8363624       | 86.91  | 901064      | 85.66    | bb               | 576                | 6.280            | 7.240          |

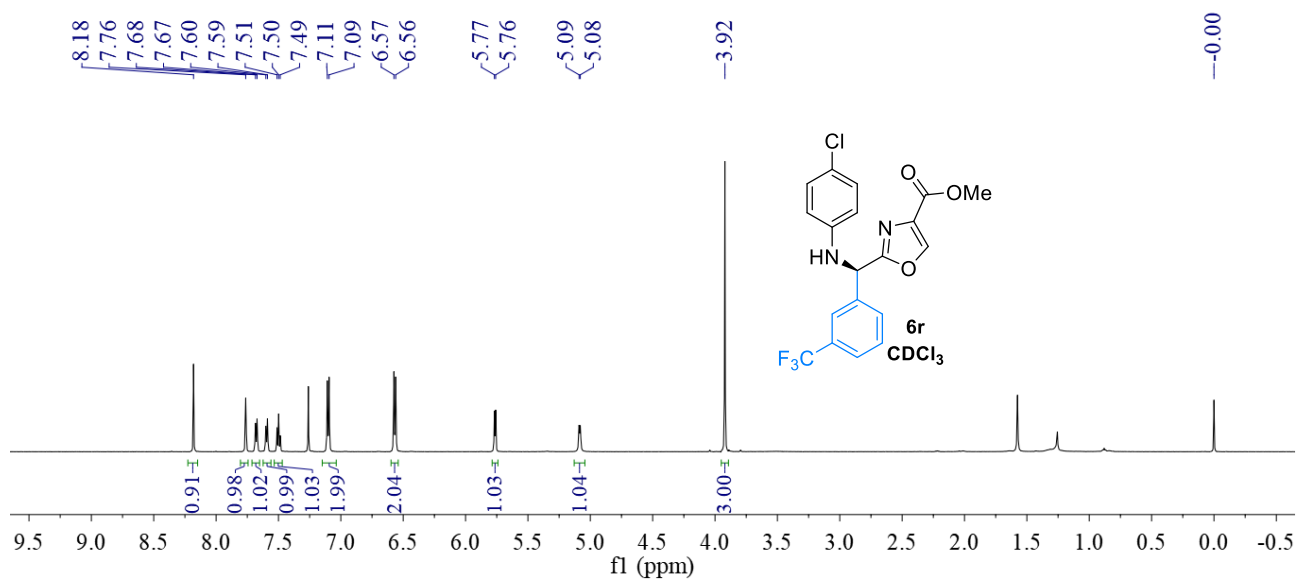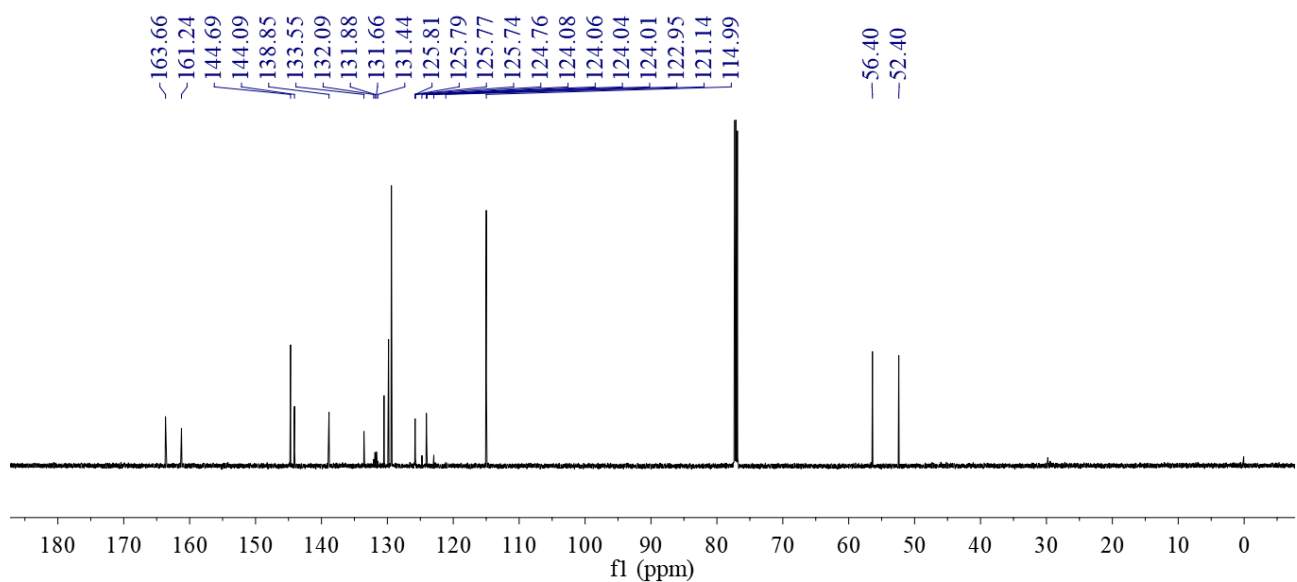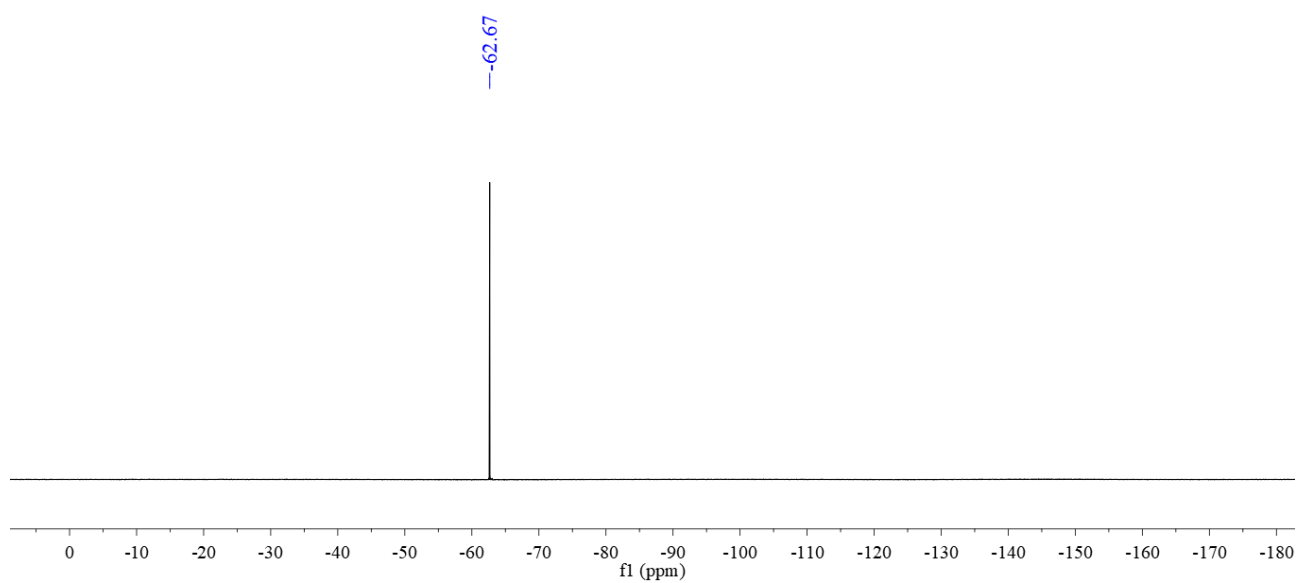

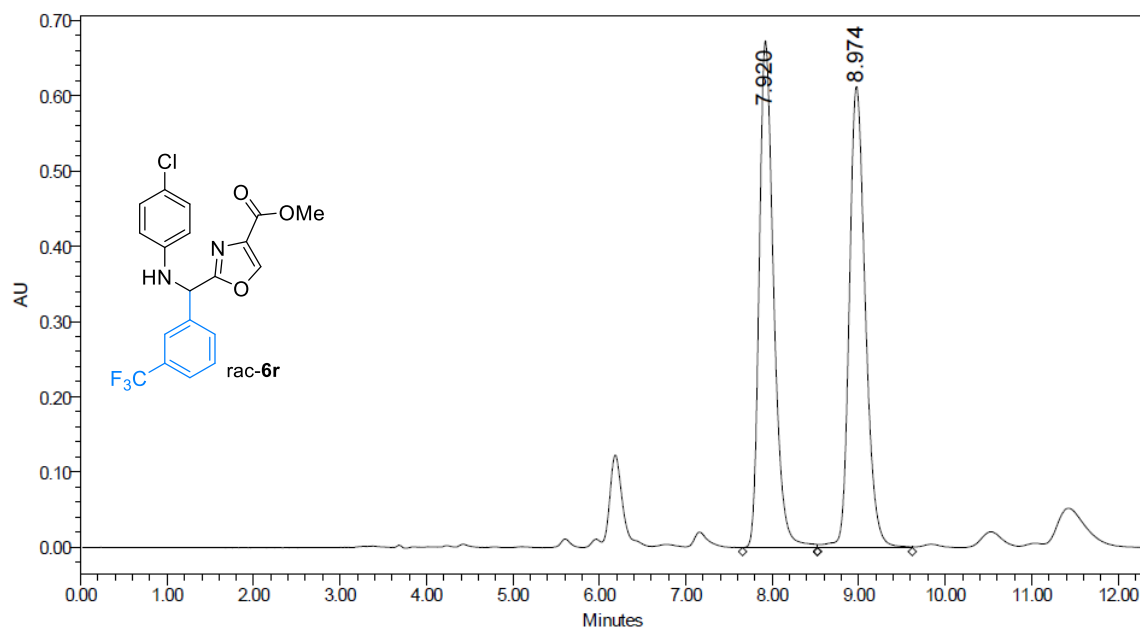

|   | RT<br>(min) | Peak<br>Type | Area<br>( $\mu\text{V}\cdot\text{sec}$ ) | % Area | Height<br>( $\mu\text{V}$ ) | % Height | Integration<br>Type | Points<br>Across Peak | Start<br>Time<br>(min) | End<br>Time<br>(min) |
|---|-------------|--------------|------------------------------------------|--------|-----------------------------|----------|---------------------|-----------------------|------------------------|----------------------|
| 1 | 7.920       | Unknown      | 7831919                                  | 49.71  | 673549                      | 52.36    | VV                  | 519                   | 7.657                  | 8.522                |
| 2 | 8.974       | Unknown      | 7922505                                  | 50.29  | 612751                      | 47.64    | VV                  | 658                   | 8.522                  | 9.618                |

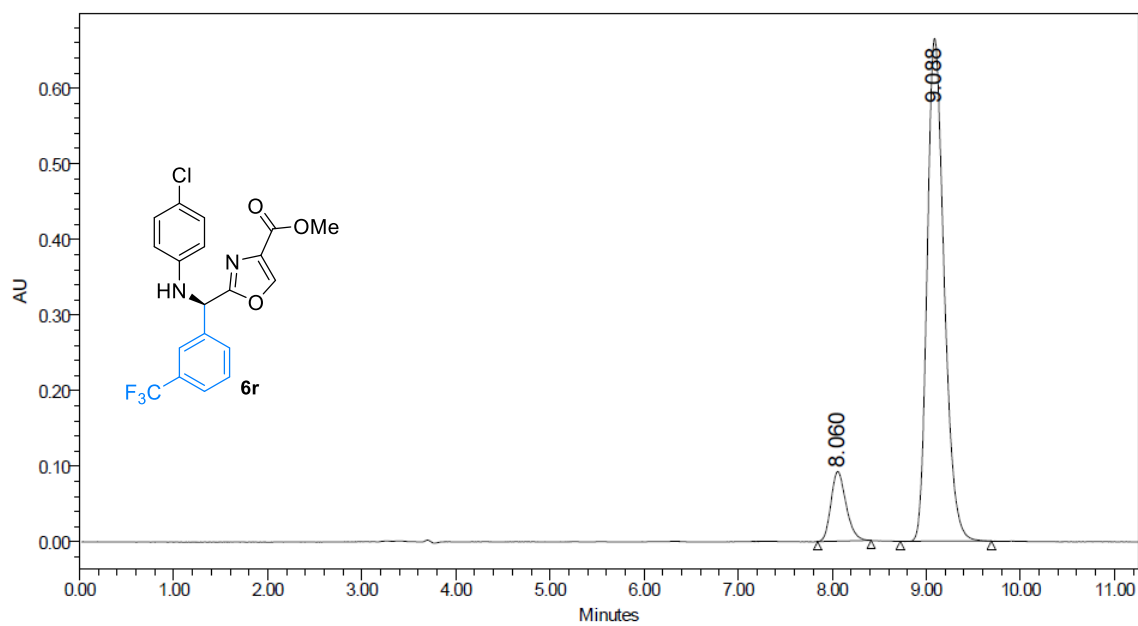

|   | RT<br>(min) | Peak<br>Type | Area<br>( $\mu\text{V}\cdot\text{sec}$ ) | % Area | Height<br>( $\mu\text{V}$ ) | % Height | Integration<br>Type | Points<br>Across Peak | Start<br>Time<br>(min) | End<br>Time<br>(min) |
|---|-------------|--------------|------------------------------------------|--------|-----------------------------|----------|---------------------|-----------------------|------------------------|----------------------|
| 1 | 8.060       | Unknown      | 1027960                                  | 11.00  | 92048                       | 12.16    | bb                  | 341                   | 7.845                  | 8.413                |
| 2 | 9.088       | Unknown      | 8320045                                  | 89.00  | 664739                      | 87.84    | bB                  | 581                   | 8.723                  | 9.692                |



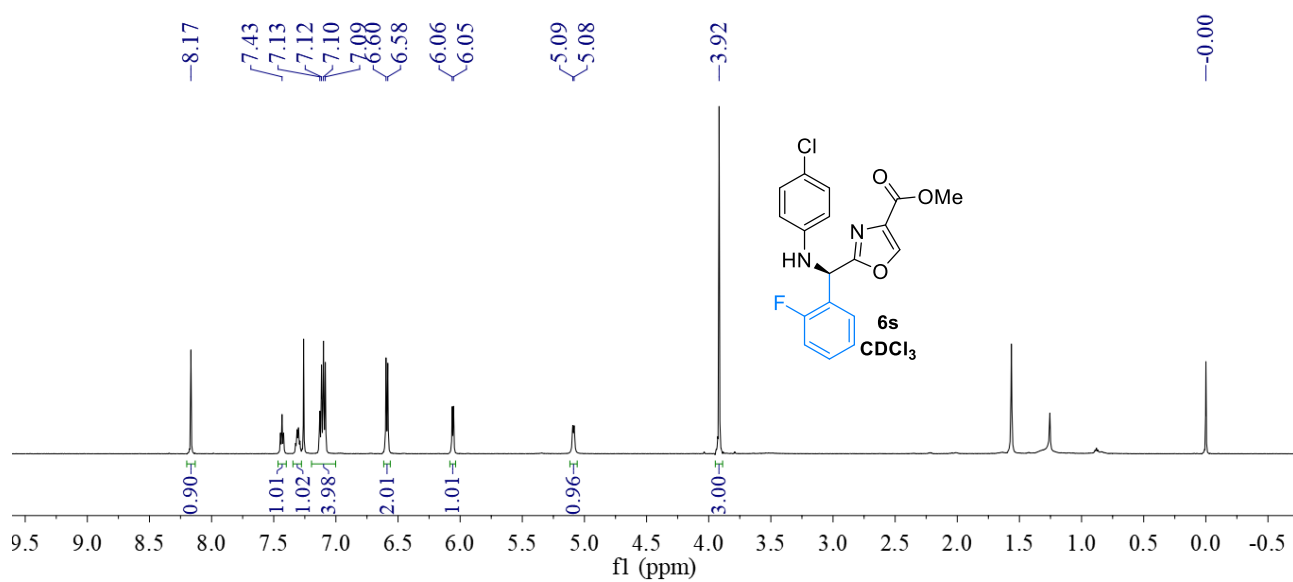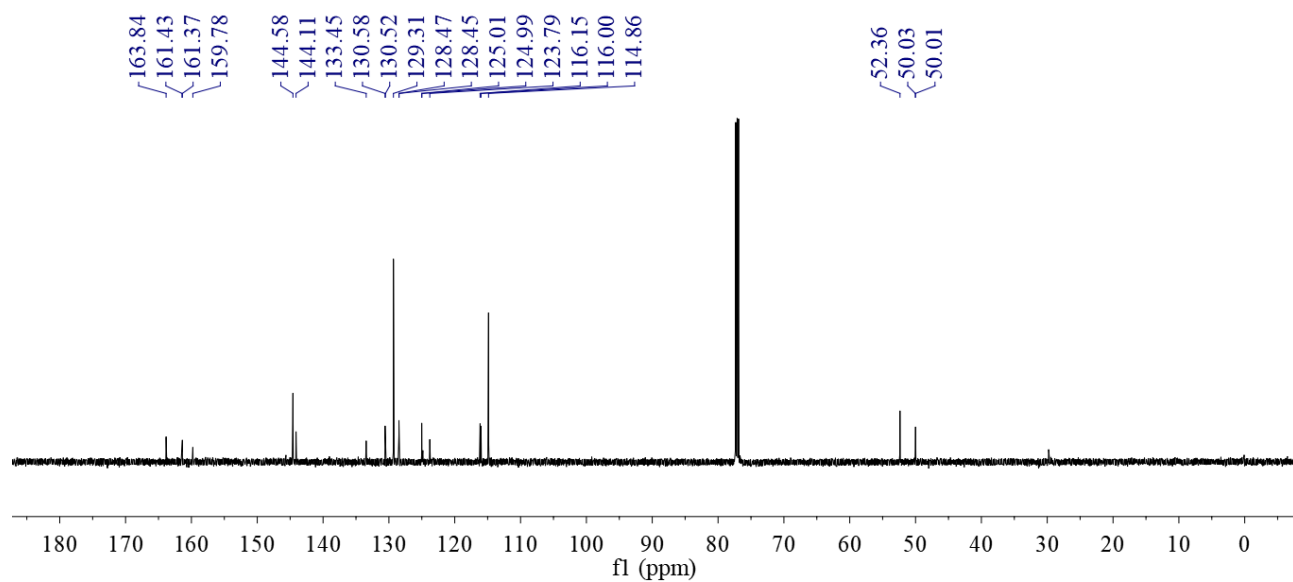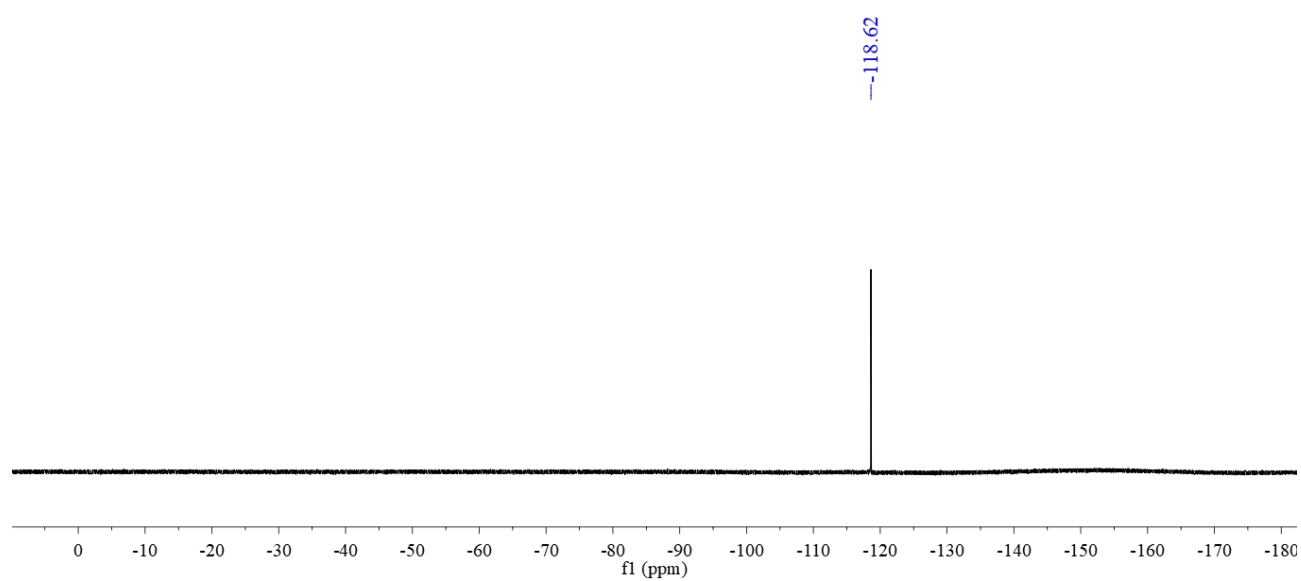

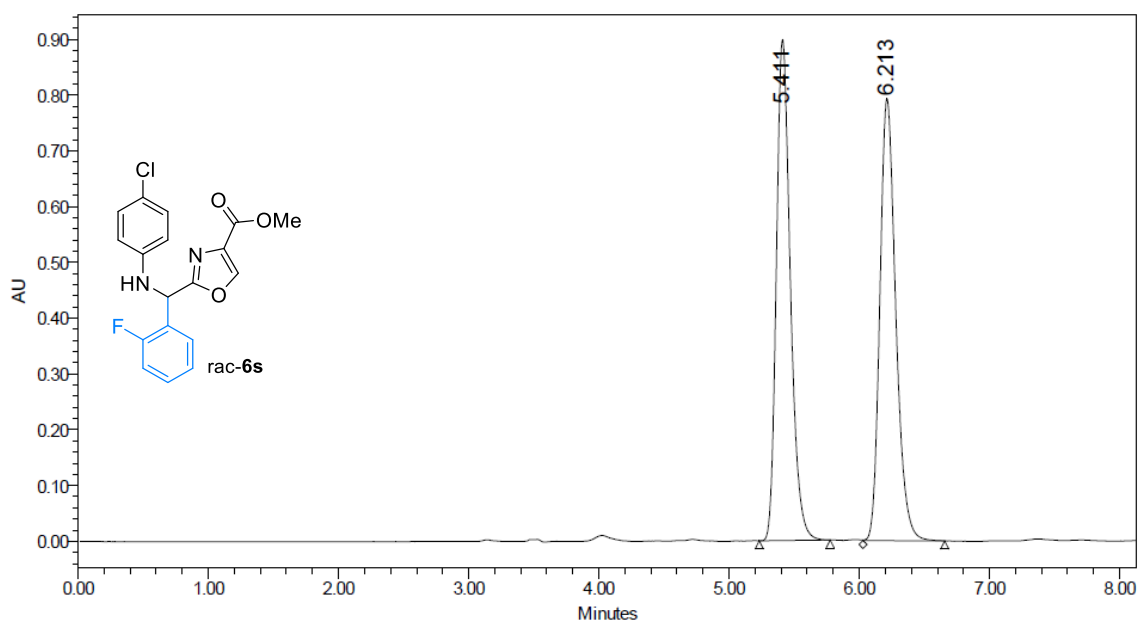

|   | RT<br>(min) | Peak<br>Type | Area<br>( $\mu\text{V}\cdot\text{sec}$ ) | % Area | Height<br>( $\mu\text{V}$ ) | % Height | Integration<br>Type | Points<br>Across Peak | Start<br>Time<br>(min) | End<br>Time<br>(min) |
|---|-------------|--------------|------------------------------------------|--------|-----------------------------|----------|---------------------|-----------------------|------------------------|----------------------|
| 1 | 5.411       | Unknown      | 6704658                                  | 49.92  | 898134                      | 53.13    | BB                  | 327                   | 5.232                  | 5.777                |
| 2 | 6.213       | Unknown      | 6725713                                  | 50.08  | 792216                      | 46.87    | VB                  | 377                   | 6.028                  | 6.657                |

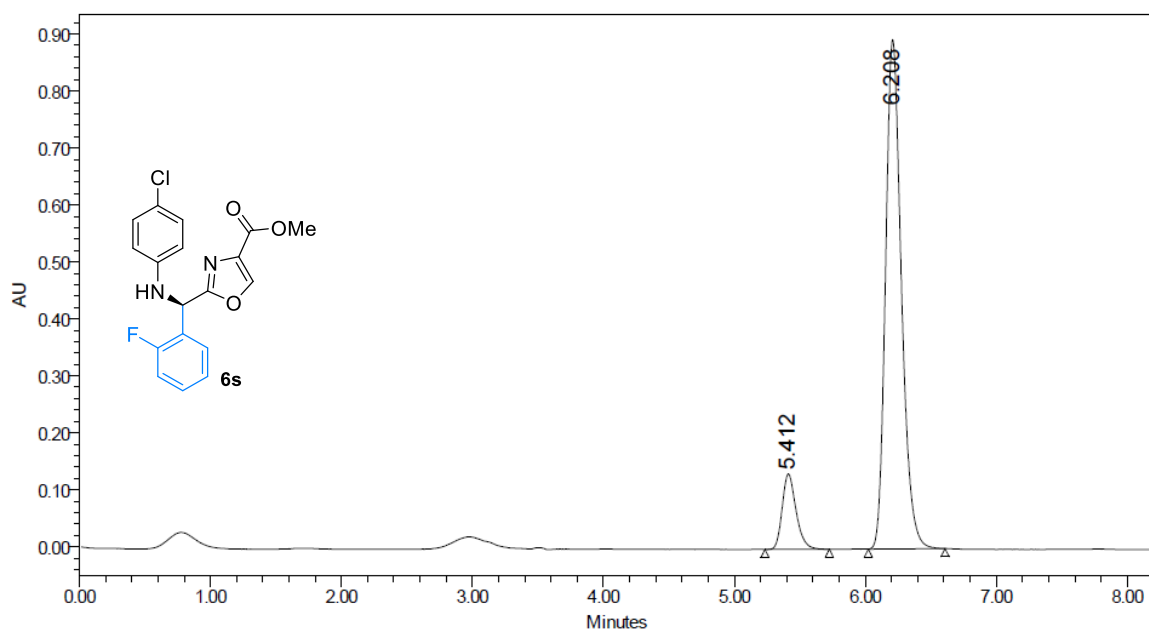

|   | RT<br>(min) | Peak<br>Type | Area<br>( $\mu\text{V}\cdot\text{sec}$ ) | % Area | Height<br>( $\mu\text{V}$ ) | % Height | Integration<br>Type | Points<br>Across Peak | Start<br>Time<br>(min) | End<br>Time<br>(min) |
|---|-------------|--------------|------------------------------------------|--------|-----------------------------|----------|---------------------|-----------------------|------------------------|----------------------|
| 1 | 5.412       | Unknown      | 972842                                   | 11.47  | 132305                      | 12.89    | Bb                  | 295                   | 5.233                  | 5.725                |
| 2 | 6.208       | Unknown      | 7511682                                  | 88.53  | 894072                      | 87.11    | Bb                  | 351                   | 6.023                  | 6.608                |

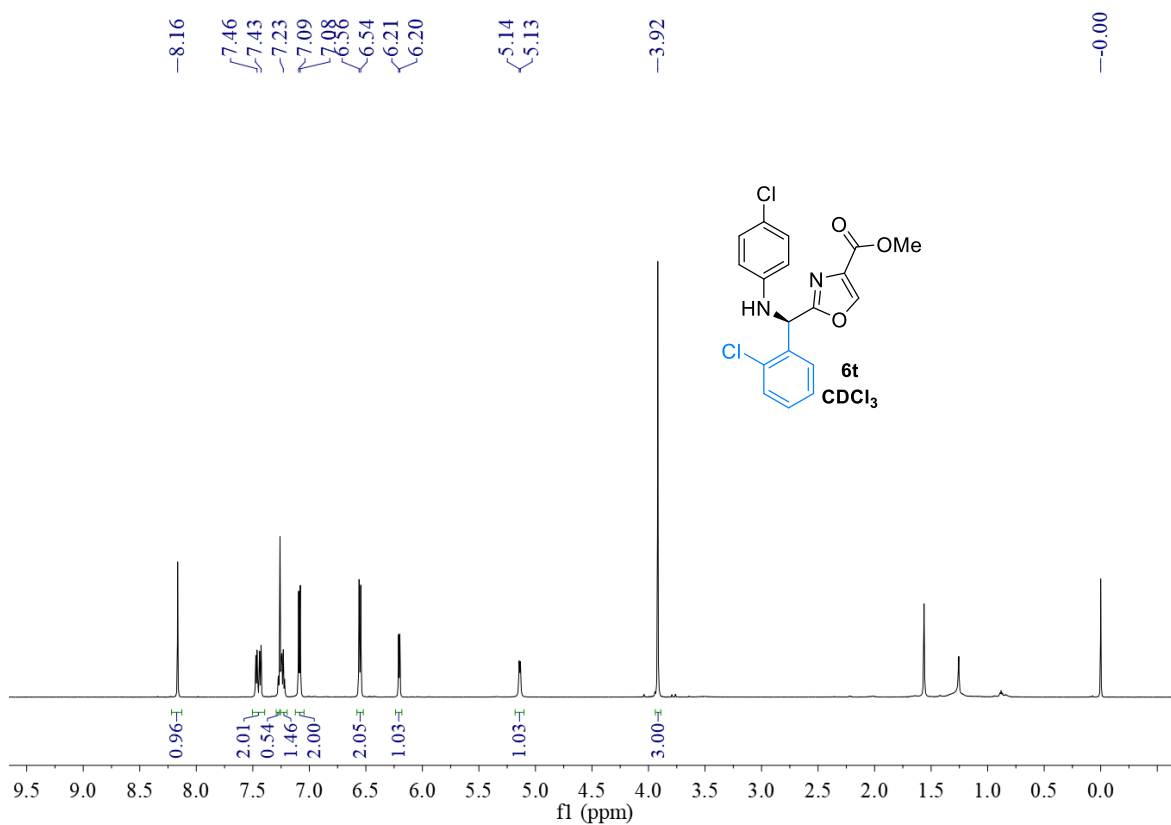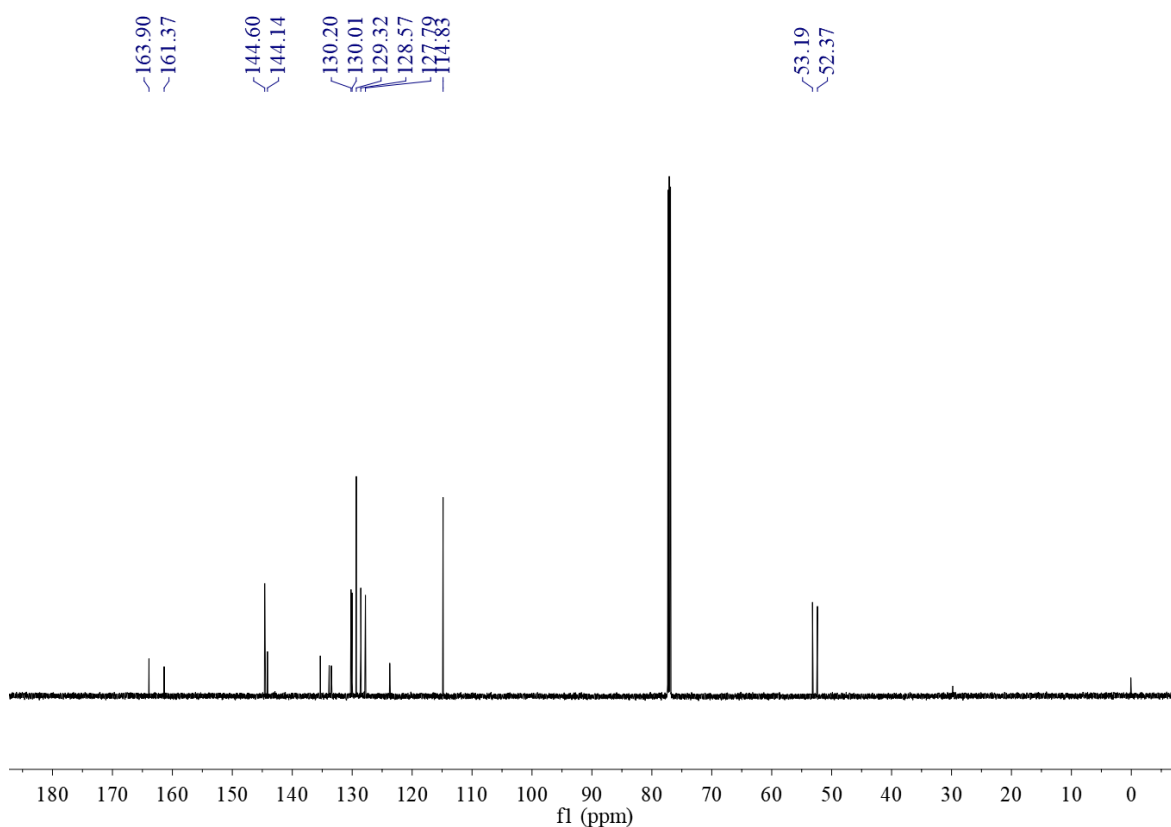

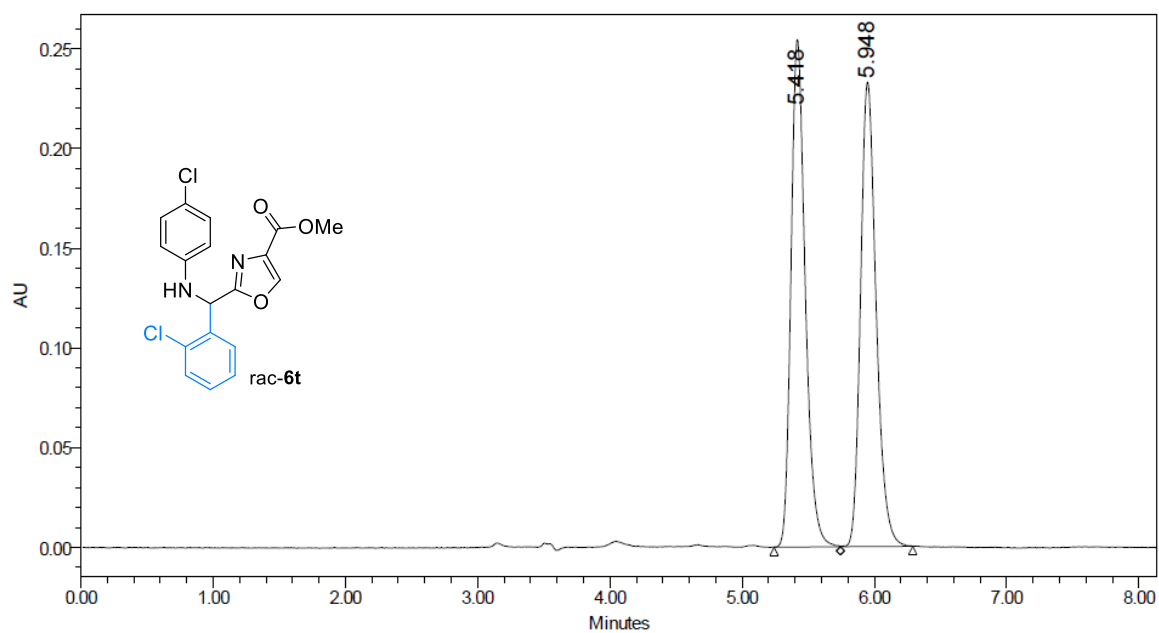

|   | RT<br>(min) | Peak<br>Type | Area<br>( $\mu\text{V}\cdot\text{sec}$ ) | % Area | Height<br>( $\mu\text{V}$ ) | % Height | Integration<br>Type | Points<br>Across Peak | Start<br>Time<br>(min) | End<br>Time<br>(min) |
|---|-------------|--------------|------------------------------------------|--------|-----------------------------|----------|---------------------|-----------------------|------------------------|----------------------|
| 1 | 5.418       | Unknown      | 1905748                                  | 50.04  | 254310                      | 52.21    | BV                  | 301                   | 5.242                  | 5.743                |
| 2 | 5.948       | Unknown      | 1902985                                  | 49.96  | 232819                      | 47.79    | VB                  | 328                   | 5.743                  | 6.290                |

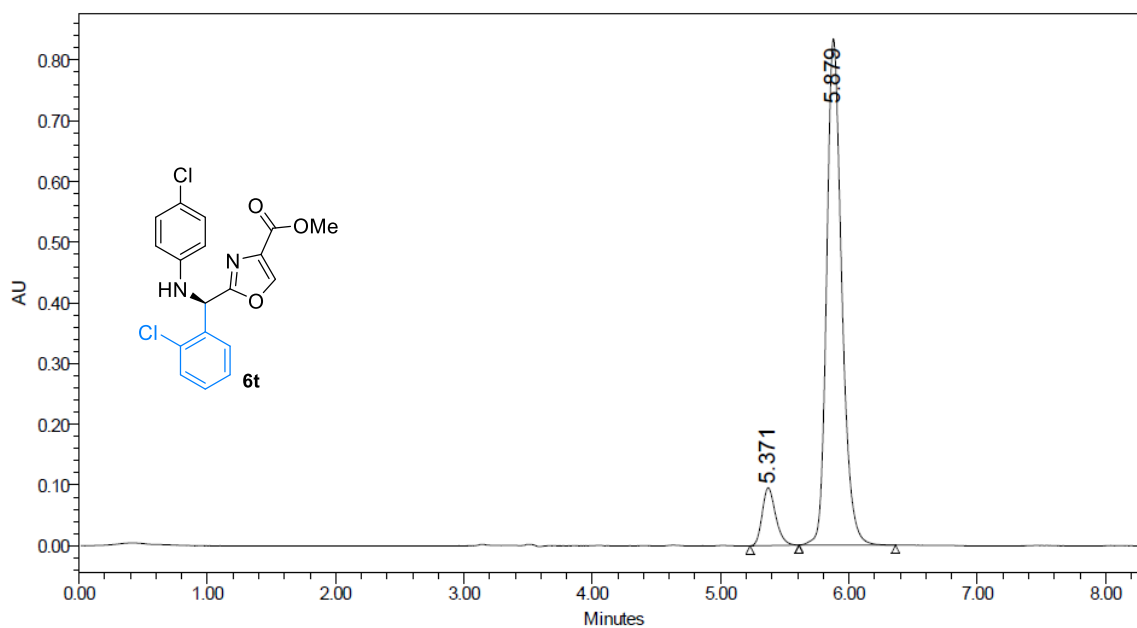

|   | RT<br>(min) | Peak<br>Type | Area<br>( $\mu\text{V}\cdot\text{sec}$ ) | % Area | Height<br>( $\mu\text{V}$ ) | % Height | Integration<br>Type | Points<br>Across Peak | Start<br>Time<br>(min) | End<br>Time<br>(min) |
|---|-------------|--------------|------------------------------------------|--------|-----------------------------|----------|---------------------|-----------------------|------------------------|----------------------|
| 1 | 5.371       | Unknown      | 691882                                   | 9.19   | 95104                       | 10.23    | bb                  | 229                   | 5.230                  | 5.612                |
| 2 | 5.879       | Unknown      | 6833493                                  | 90.81  | 834378                      | 89.77    | bb                  | 451                   | 5.612                  | 6.363                |

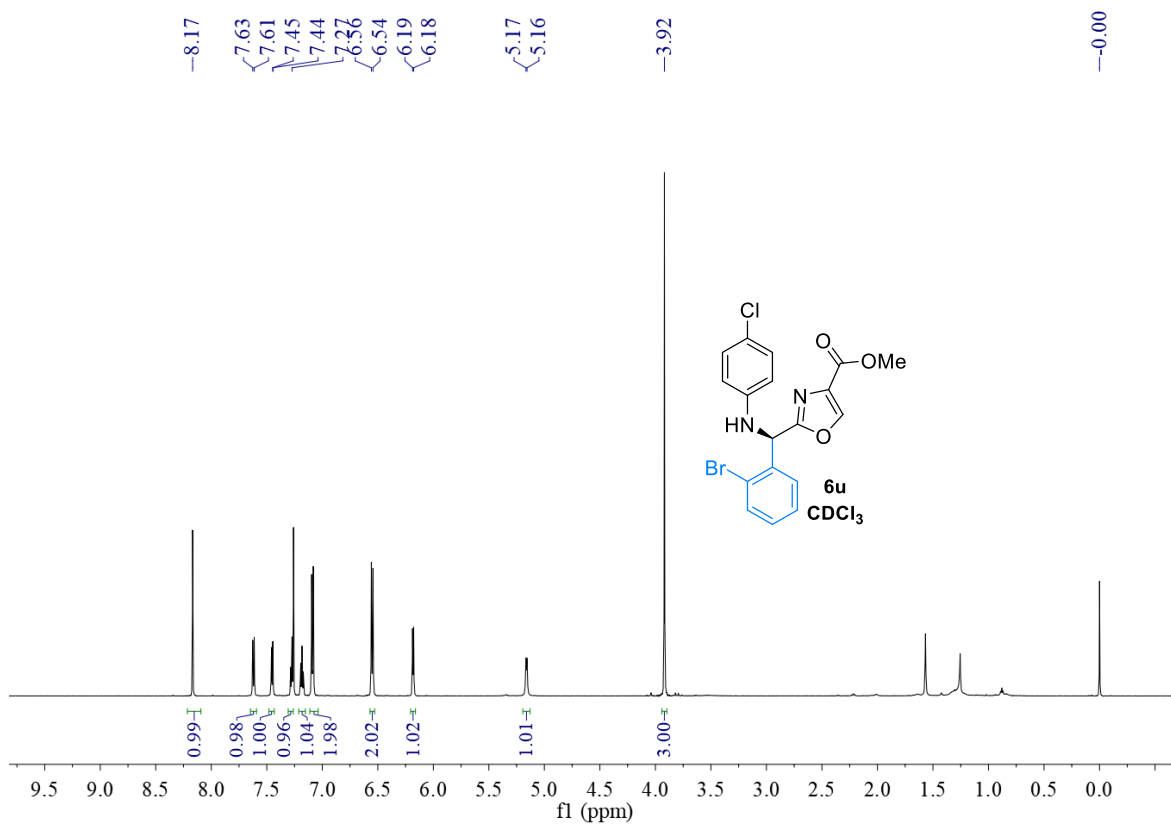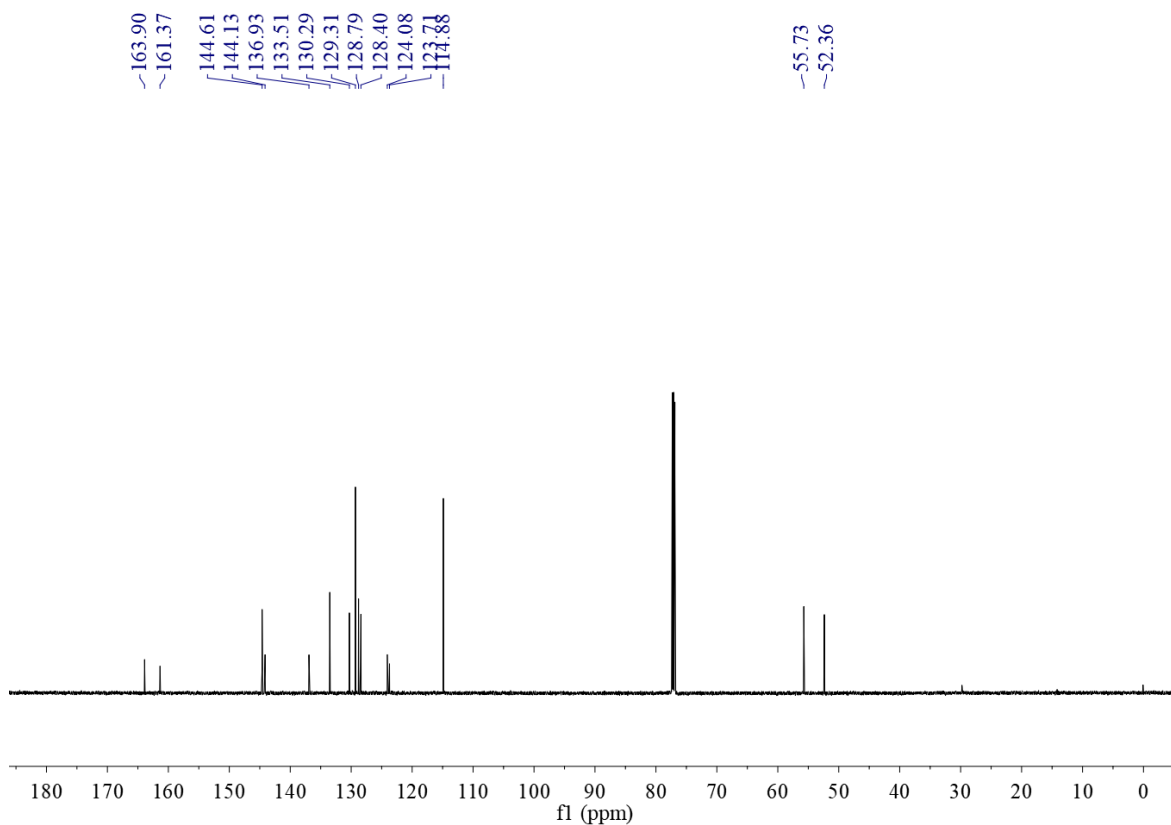

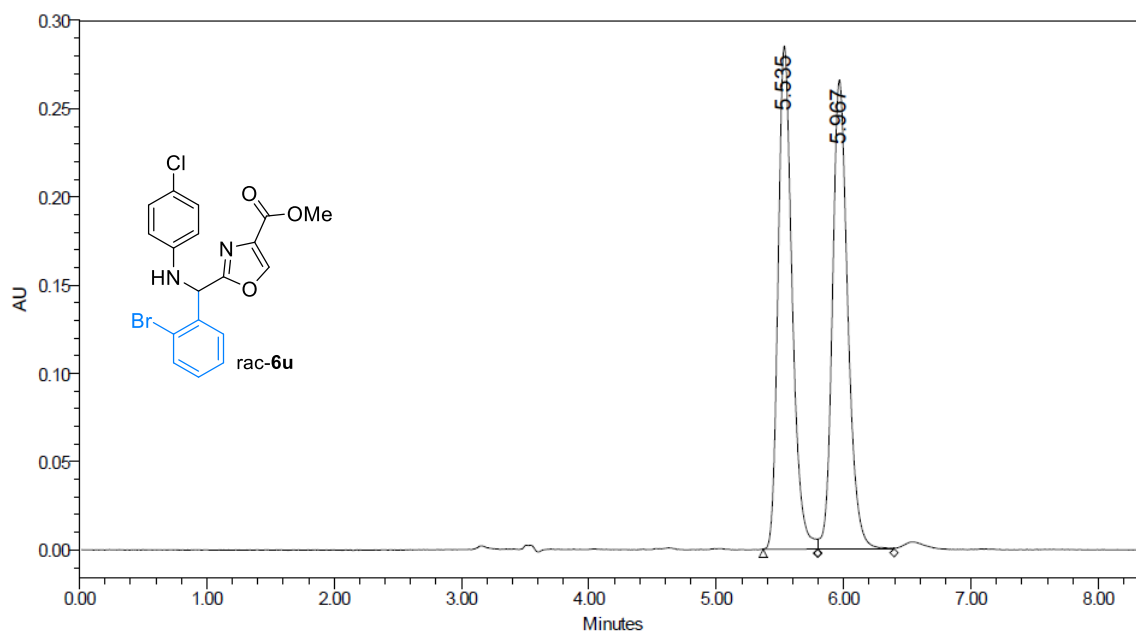

|   | RT (min) | Peak Type | Area (μV*sec) | % Area | Height (μV) | % Height | Integration Type | Points Across Peak | Start Time (min) | End Time (min) |
|---|----------|-----------|---------------|--------|-------------|----------|------------------|--------------------|------------------|----------------|
| 1 | 5.535    | Unknown   | 2193016       | 49.68  | 285151      | 51.74    | BV               | 257                | 5.368            | 5.797          |
| 2 | 5.967    | Unknown   | 2221494       | 50.32  | 265928      | 48.26    | VV               | 360                | 5.797            | 6.397          |

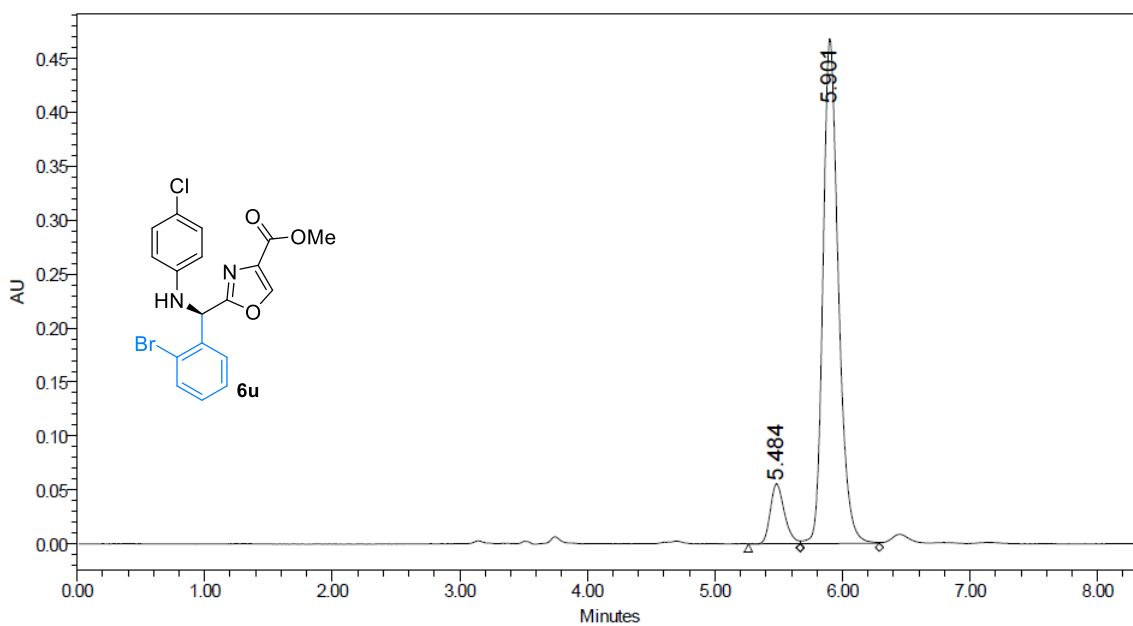

|   | RT (min) | Peak Type | Area (μV*sec) | % Area | Height (μV) | % Height | Integration Type | Points Across Peak | Start Time (min) | End Time (min) |
|---|----------|-----------|---------------|--------|-------------|----------|------------------|--------------------|------------------|----------------|
| 1 | 5.484    | Unknown   | 425013        | 9.75   | 55312       | 10.57    | bV               | 243                | 5.263            | 5.668          |
| 2 | 5.904    | Unknown   | 3934039       | 90.25  | 467776      | 89.43    | VV               | 373                | 5.668            | 6.290          |

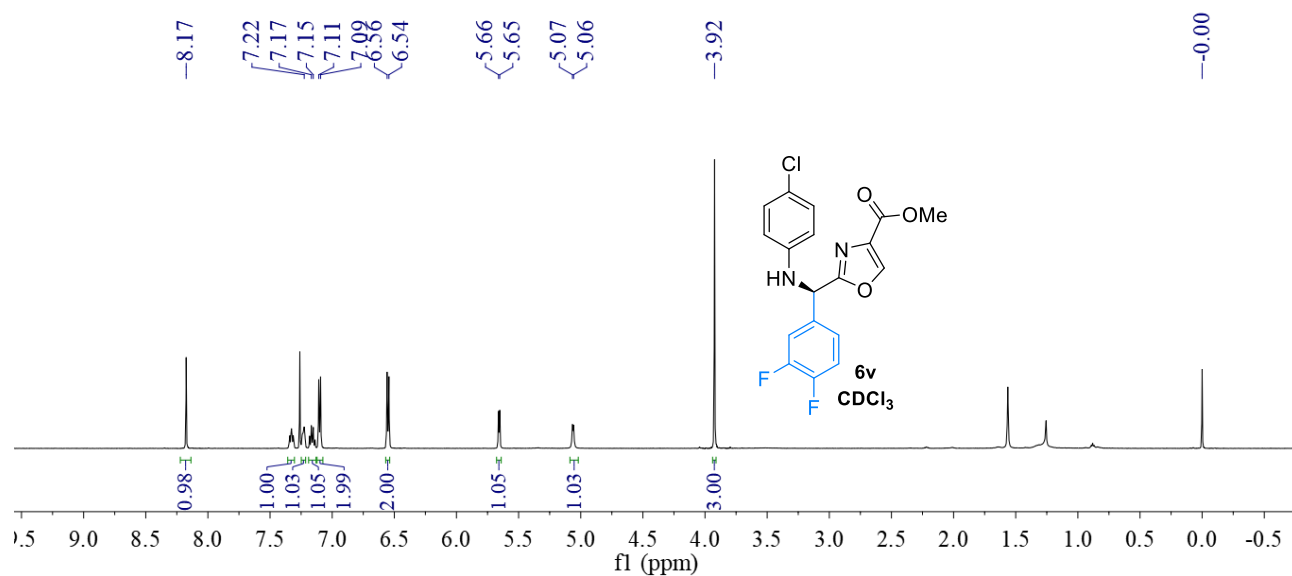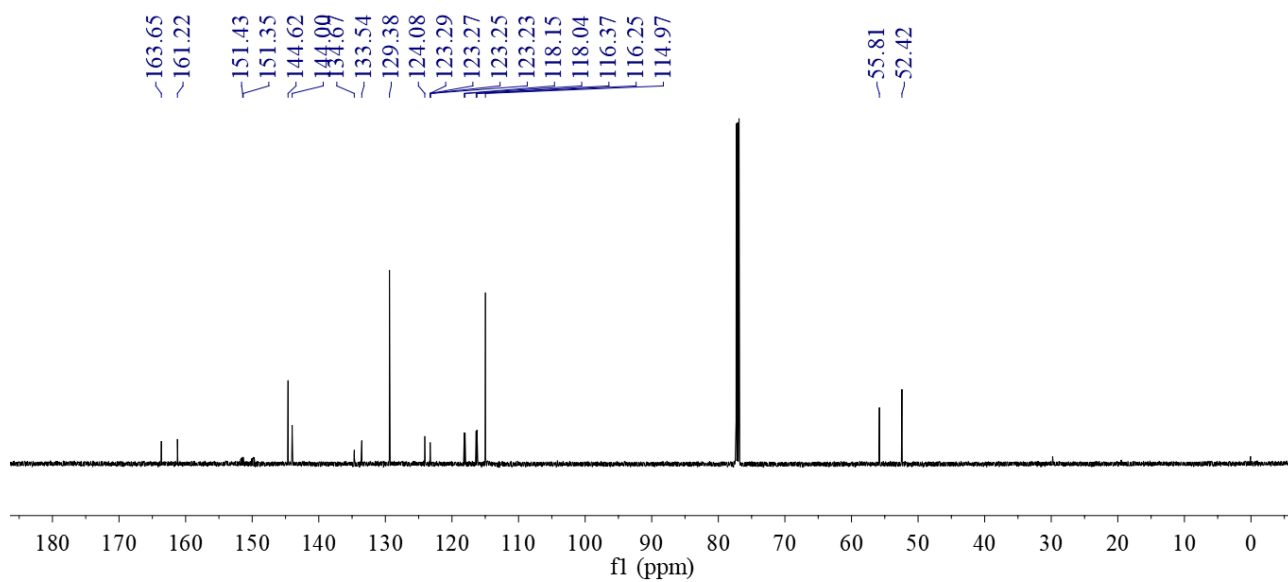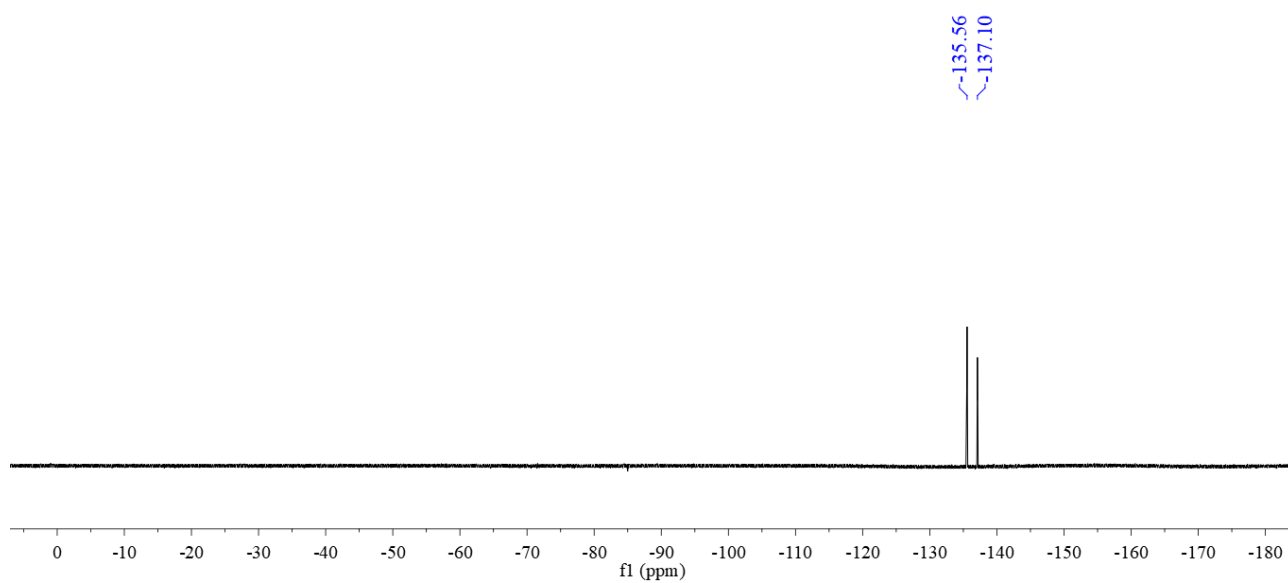

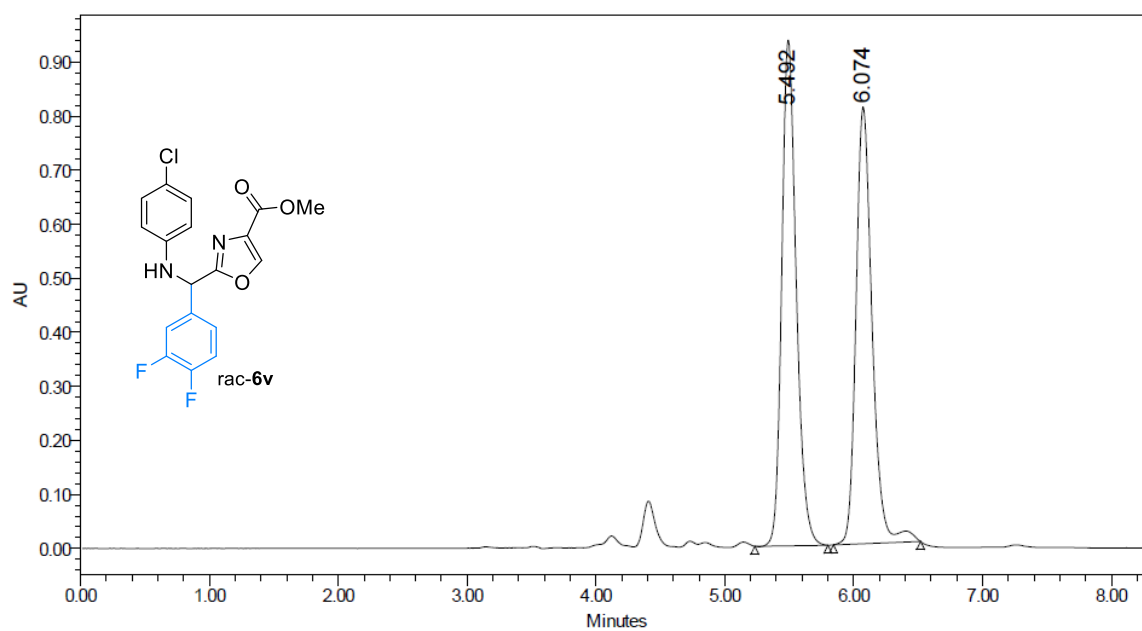

|   | RT<br>(min) | Peak<br>Type | Area<br>( $\mu\text{V}\cdot\text{sec}$ ) | % Area | Height<br>( $\mu\text{V}$ ) | % Height | Integration<br>Type | Points<br>Across Peak | Start<br>Time<br>(min) | End<br>Time<br>(min) |
|---|-------------|--------------|------------------------------------------|--------|-----------------------------|----------|---------------------|-----------------------|------------------------|----------------------|
| 1 | 5.492       | Unknown      | 7321522                                  | 50.94  | 935628                      | 53.66    | bb                  | 340                   | 5.233                  | 5.800                |
| 2 | 6.074       | Unknown      | 7051889                                  | 49.06  | 807910                      | 46.34    | bb                  | 406                   | 5.843                  | 6.520                |

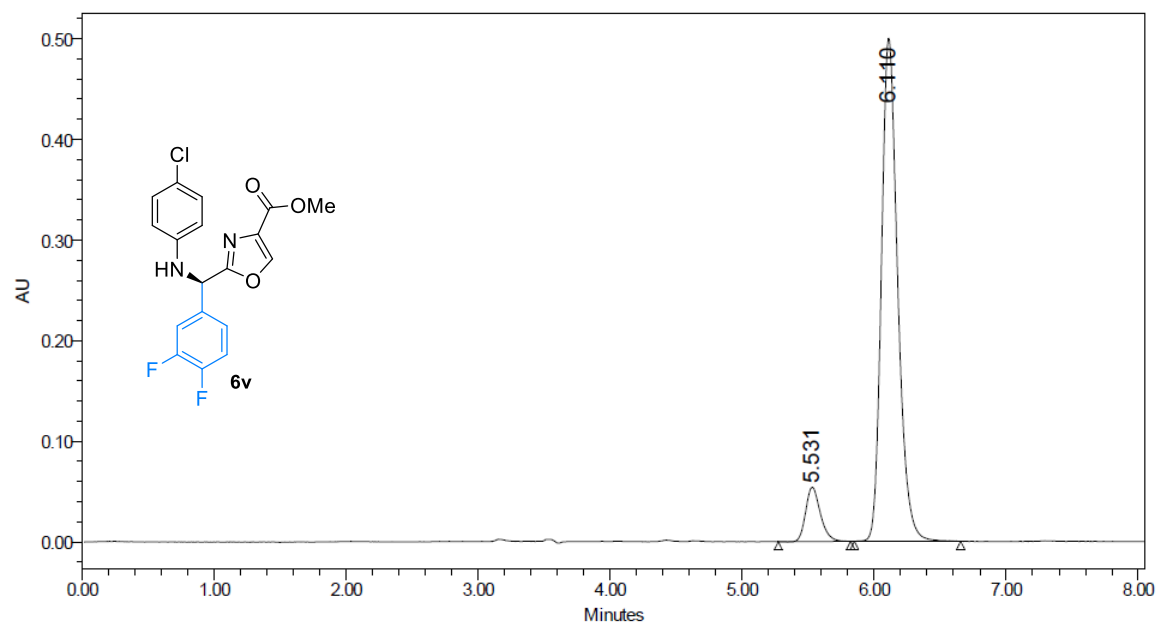

|   | RT<br>(min) | Peak<br>Type | Area<br>( $\mu\text{V}\cdot\text{sec}$ ) | % Area | Height<br>( $\mu\text{V}$ ) | % Height | Integration<br>Type | Points<br>Across Peak | Start<br>Time<br>(min) | End<br>Time<br>(min) |
|---|-------------|--------------|------------------------------------------|--------|-----------------------------|----------|---------------------|-----------------------|------------------------|----------------------|
| 1 | 5.531       | Unknown      | 418340                                   | 8.90   | 53909                       | 9.73     | bb                  | 329                   | 5.273                  | 5.822                |
| 2 | 6.110       | Unknown      | 4283383                                  | 91.10  | 499940                      | 90.27    | bb                  | 483                   | 5.850                  | 6.655                |



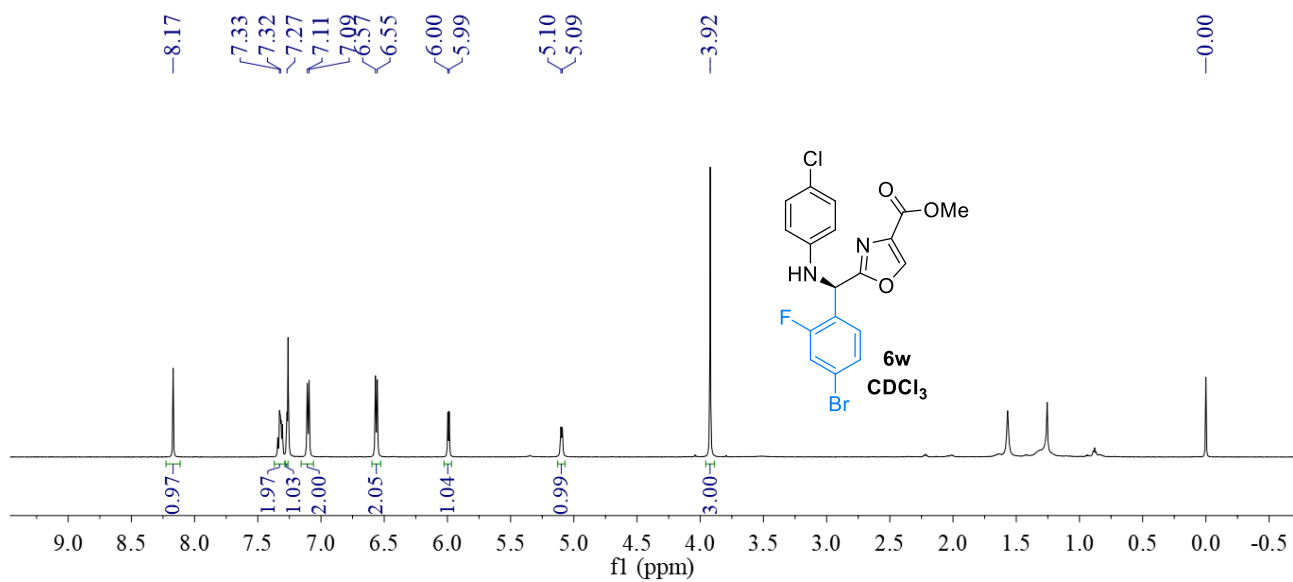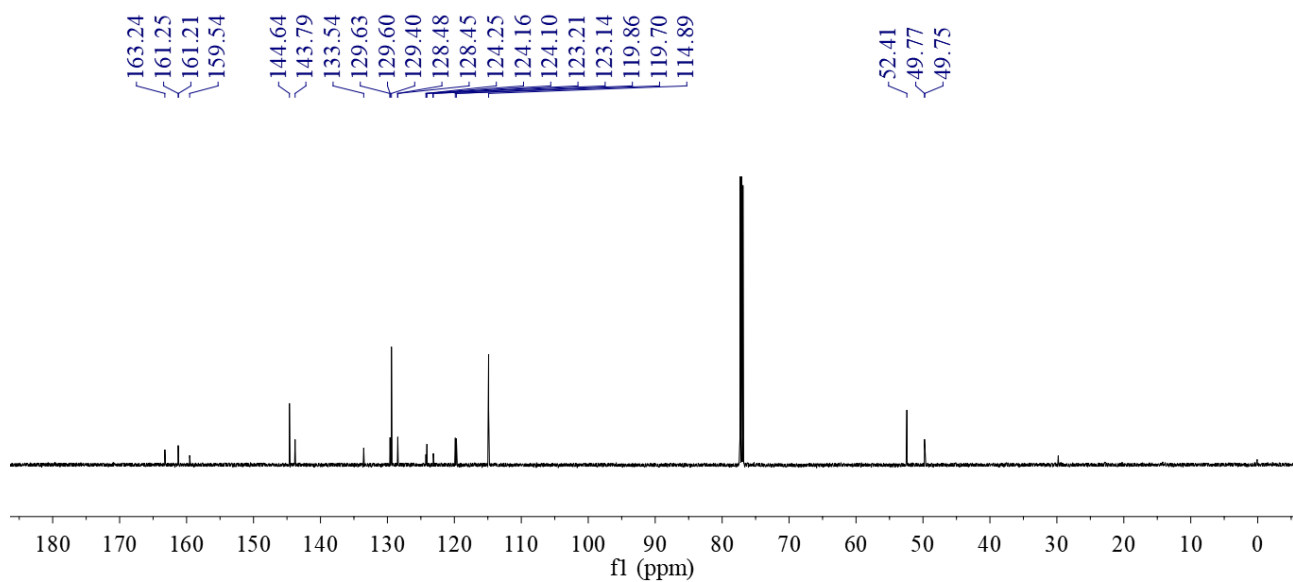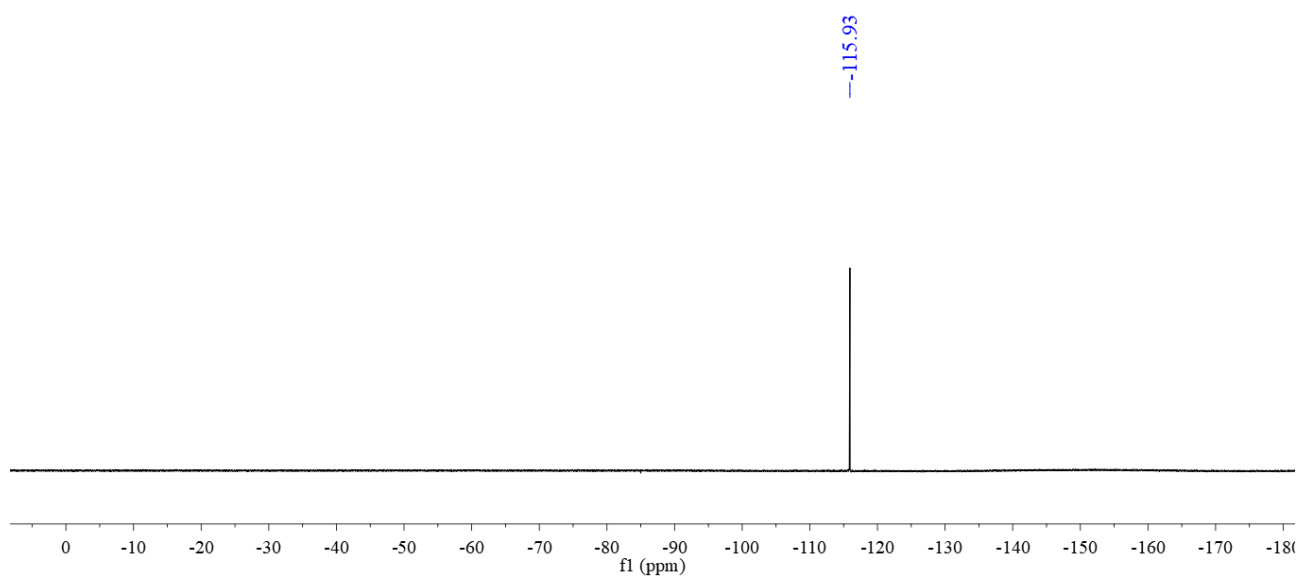

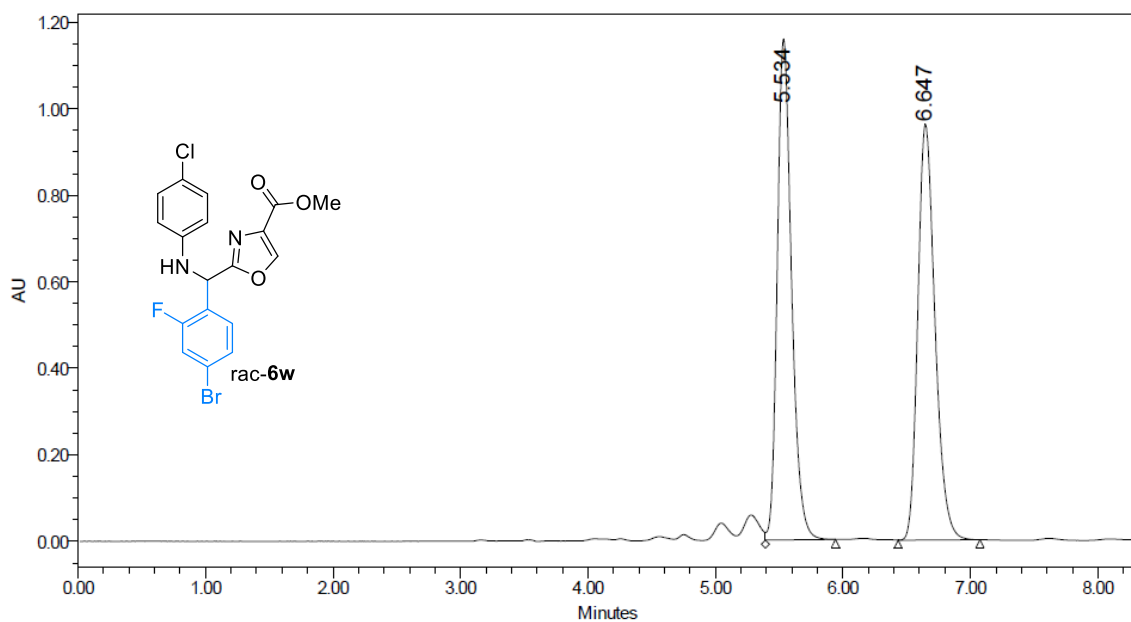

|   | RT (min) | Peak Type | Area (μV*sec) | % Area | Height (μV) | % Height | Integration Type | Points Across Peak | Start Time (min) | End Time (min) |
|---|----------|-----------|---------------|--------|-------------|----------|------------------|--------------------|------------------|----------------|
| 1 | 5.534    | Unknown   | 9007040       | 50.02  | 1158268     | 54.66    | VB               | 330                | 5.392            | 5.942          |
| 2 | 6.647    | Unknown   | 8999358       | 49.98  | 960785      | 45.34    | BB               | 385                | 6.433            | 7.075          |

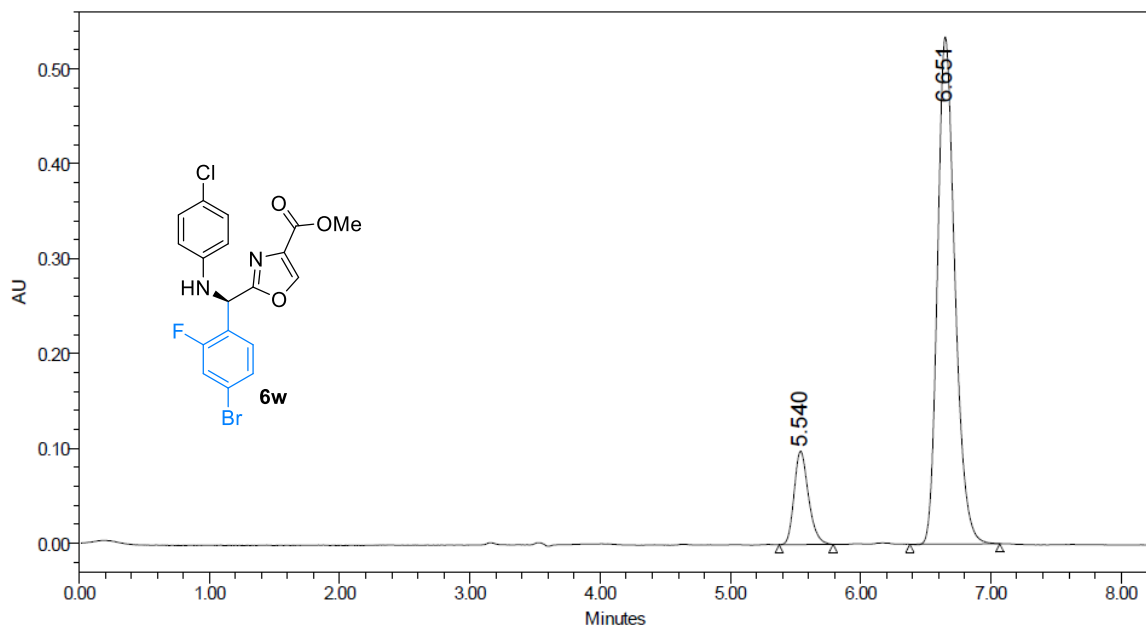

|   | RT (min) | Peak Type | Area (μV*sec) | % Area | Height (μV) | % Height | Integration Type | Points Across Peak | Start Time (min) | End Time (min) |
|---|----------|-----------|---------------|--------|-------------|----------|------------------|--------------------|------------------|----------------|
| 1 | 5.540    | Unknown   | 753364        | 13.14  | 98317       | 15.54    | bb               | 249                | 5.375            | 5.790          |
| 2 | 6.651    | Unknown   | 4978399       | 86.86  | 534536      | 84.46    | bB               | 414                | 6.378            | 7.068          |

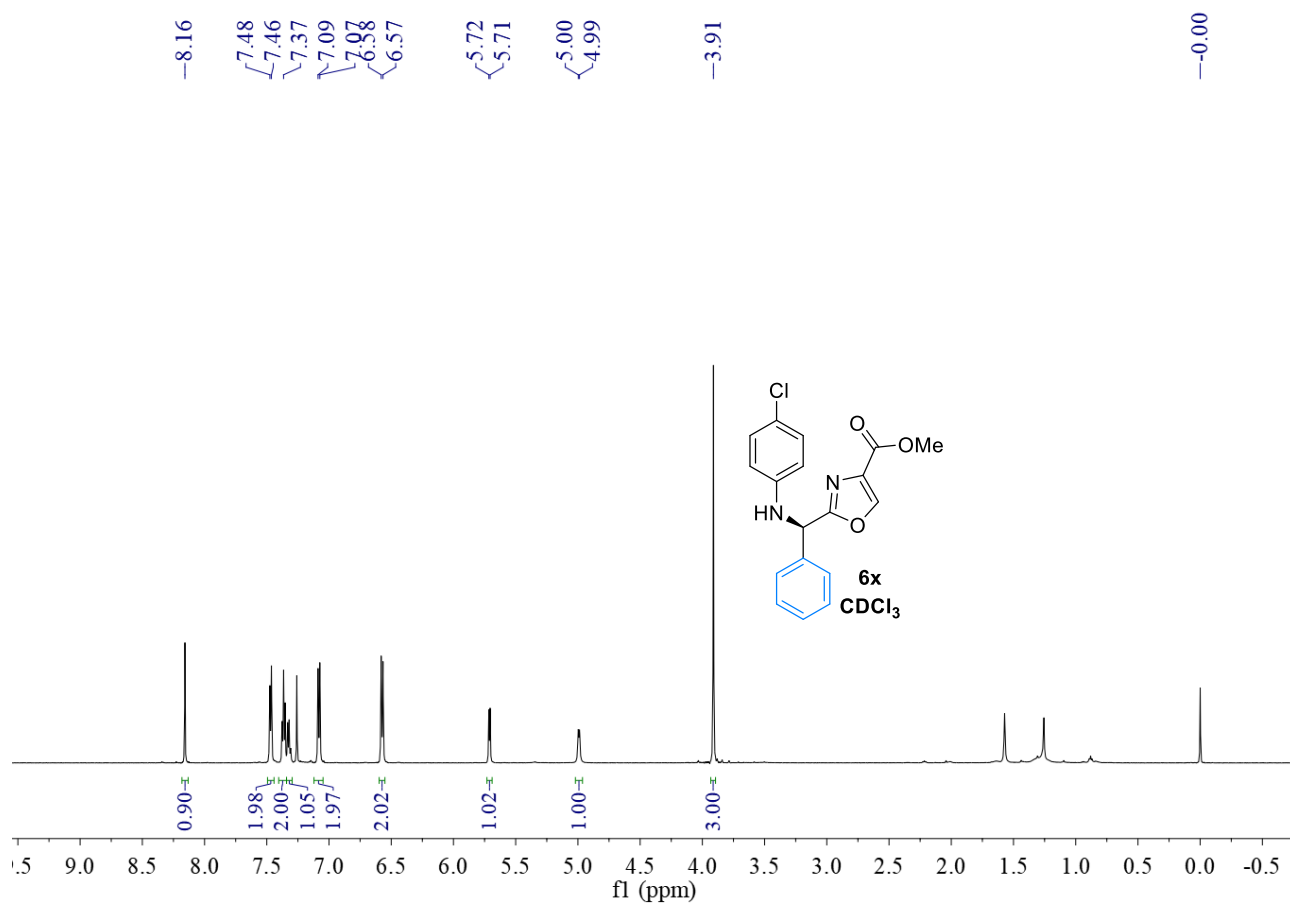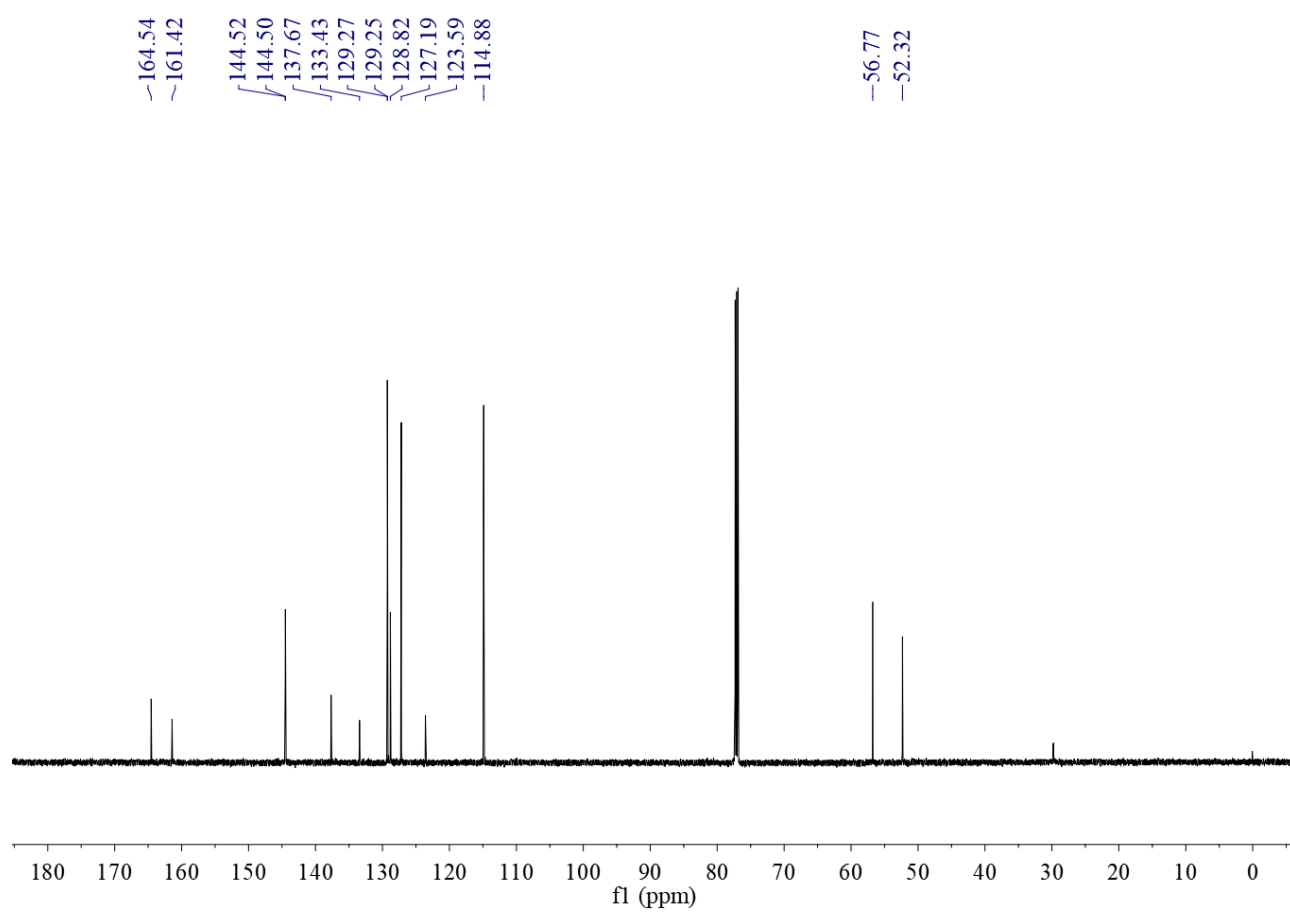

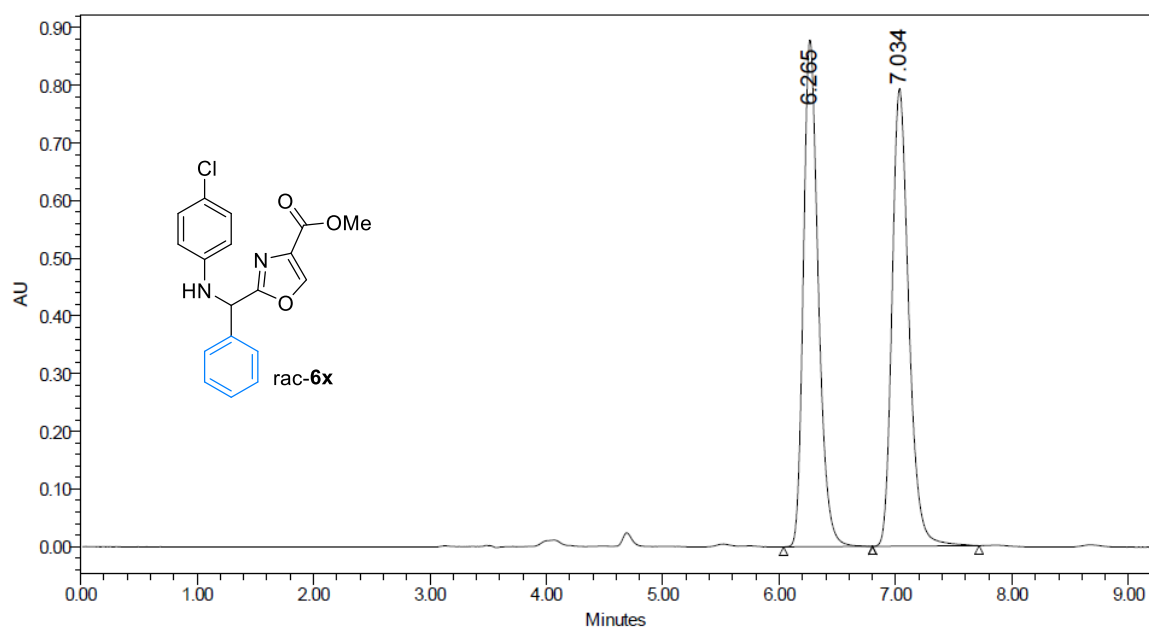

|   | RT (min) | Peak Type | Area (μV*sec) | % Area | Height (μV) | % Height | Integration Type | Points Across Peak | Start Time (min) | End Time (min) |
|---|----------|-----------|---------------|--------|-------------|----------|------------------|--------------------|------------------|----------------|
| 1 | 6.265    | Unknown   | 7817319       | 49.62  | 878293      | 52.55    | BB               | 458                | 6.038            | 6.802          |
| 2 | 7.034    | Unknown   | 7937904       | 50.38  | 793110      | 47.45    | BB               | 549                | 6.802            | 7.717          |

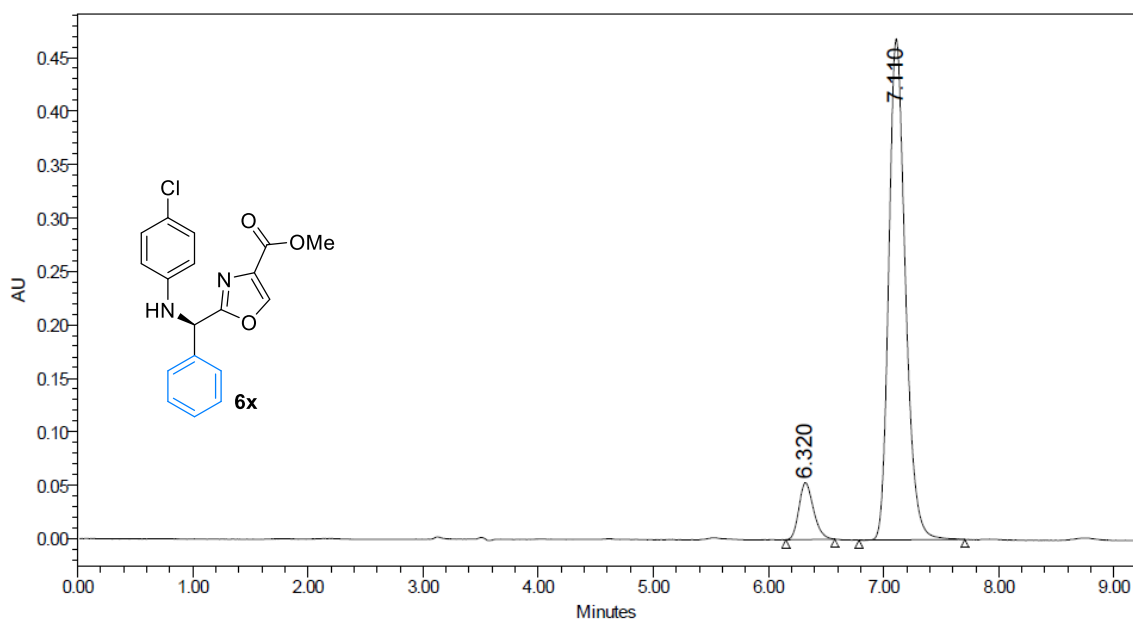

|   | RT (min) | Peak Type | Area (μV*sec) | % Area | Height (μV) | % Height | Integration Type | Points Across Peak | Start Time (min) | End Time (min) |
|---|----------|-----------|---------------|--------|-------------|----------|------------------|--------------------|------------------|----------------|
| 1 | 6.320    | Unknown   | 467263        | 9.04   | 53090       | 10.17    | Bb               | 255                | 6.152            | 6.577          |
| 2 | 7.110    | Unknown   | 4701232       | 90.96  | 468960      | 89.83    | bb               | 551                | 6.787            | 7.705          |

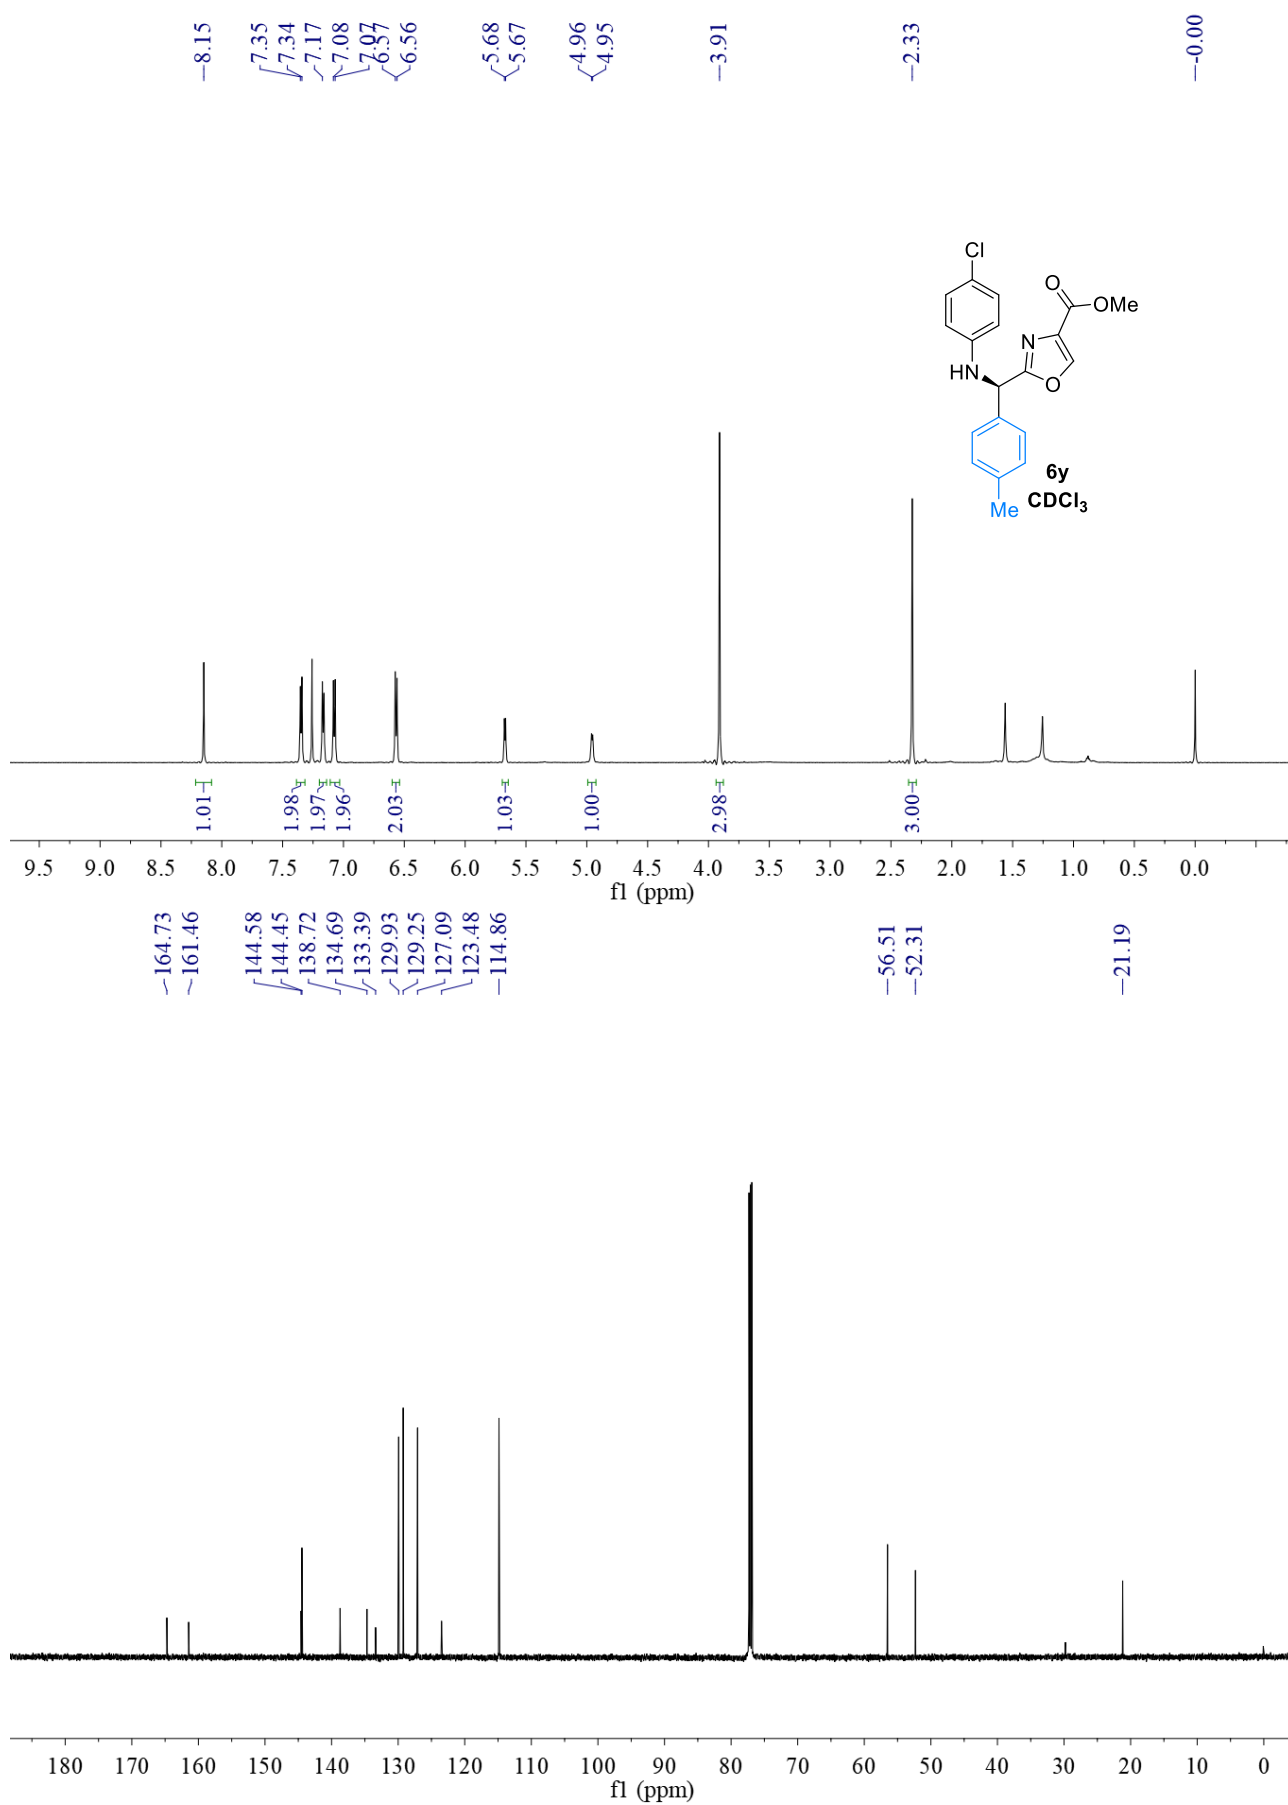

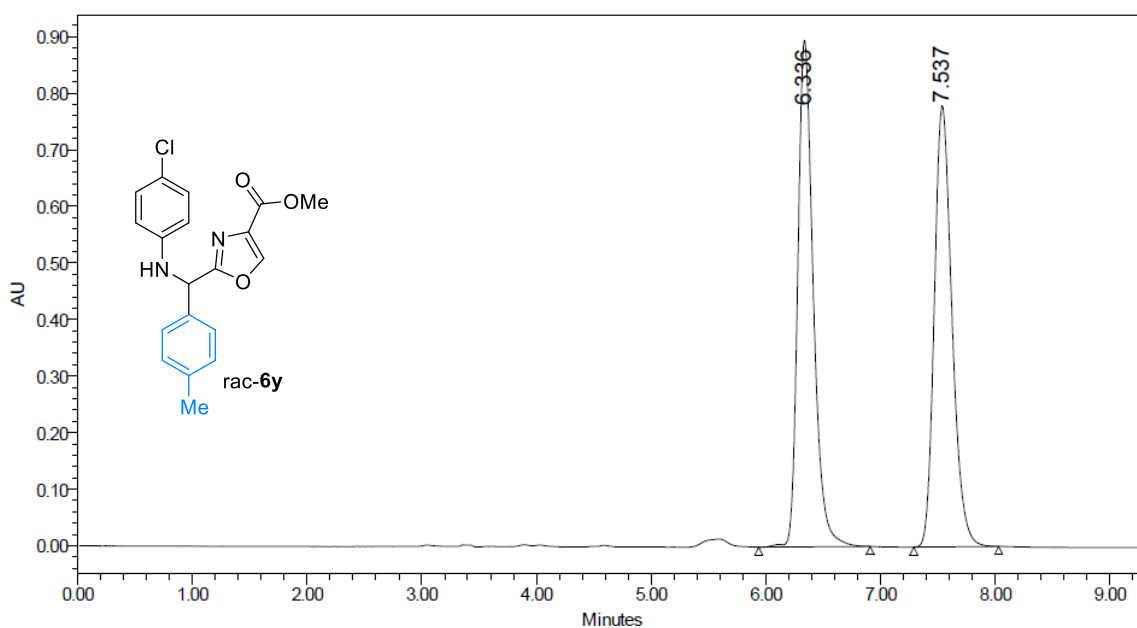

|   | RT (min) | Peak Type | Area (μV*sec) | % Area | Height (μV) | % Height | Integration Type | Points Across Peak | Start Time (min) | End Time (min) |
|---|----------|-----------|---------------|--------|-------------|----------|------------------|--------------------|------------------|----------------|
| 1 | 6.336    | Unknown   | 8402080       | 50.21  | 895523      | 53.48    | BB               | 583                | 5.937            | 6.908          |
| 2 | 7.537    | Unknown   | 8331825       | 49.79  | 779070      | 46.52    | BB               | 444                | 7.288            | 8.028          |

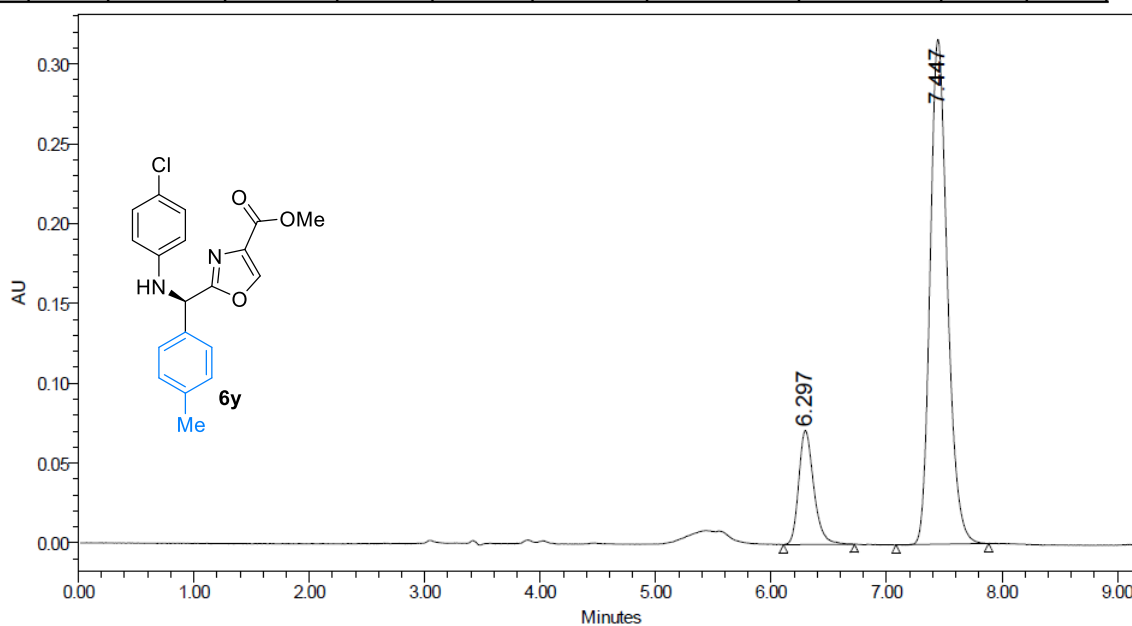

|   | RT (min) | Peak Type | Area (μV*sec) | % Area | Height (μV) | % Height | Integration Type | Points Across Peak | Start Time (min) | End Time (min) |
|---|----------|-----------|---------------|--------|-------------|----------|------------------|--------------------|------------------|----------------|
| 1 | 6.297    | Unknown   | 649842        | 16.49  | 71521       | 18.44    | Bb               | 369                | 6.108            | 6.723          |
| 2 | 7.447    | Unknown   | 3292137       | 83.51  | 316310      | 81.56    | bB               | 481                | 7.083            | 7.885          |

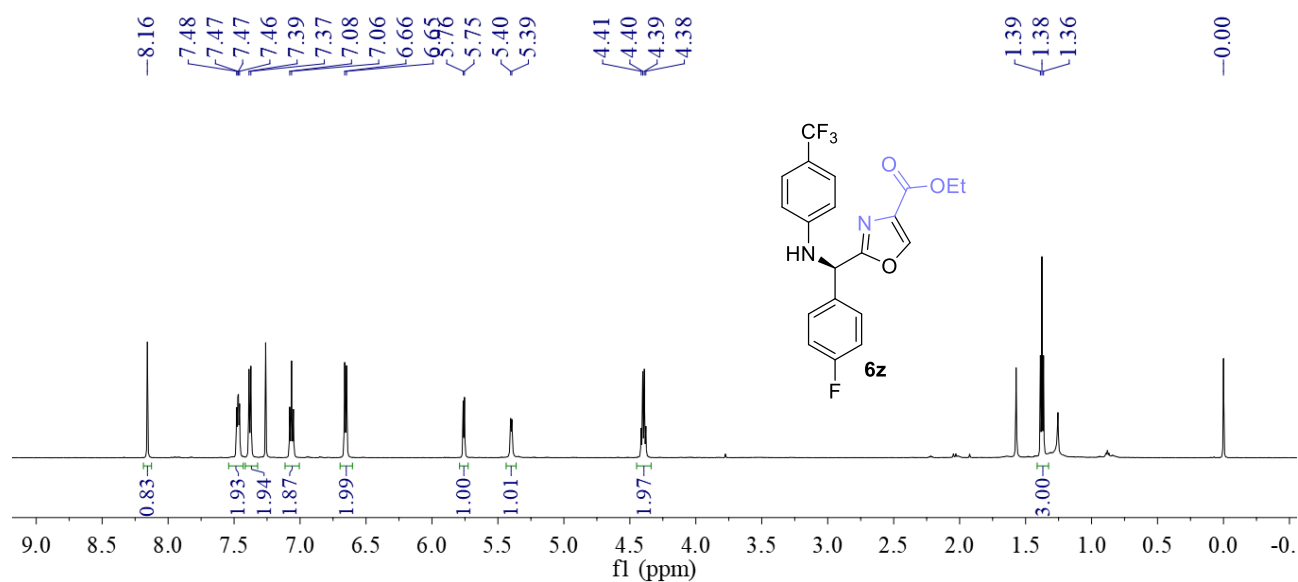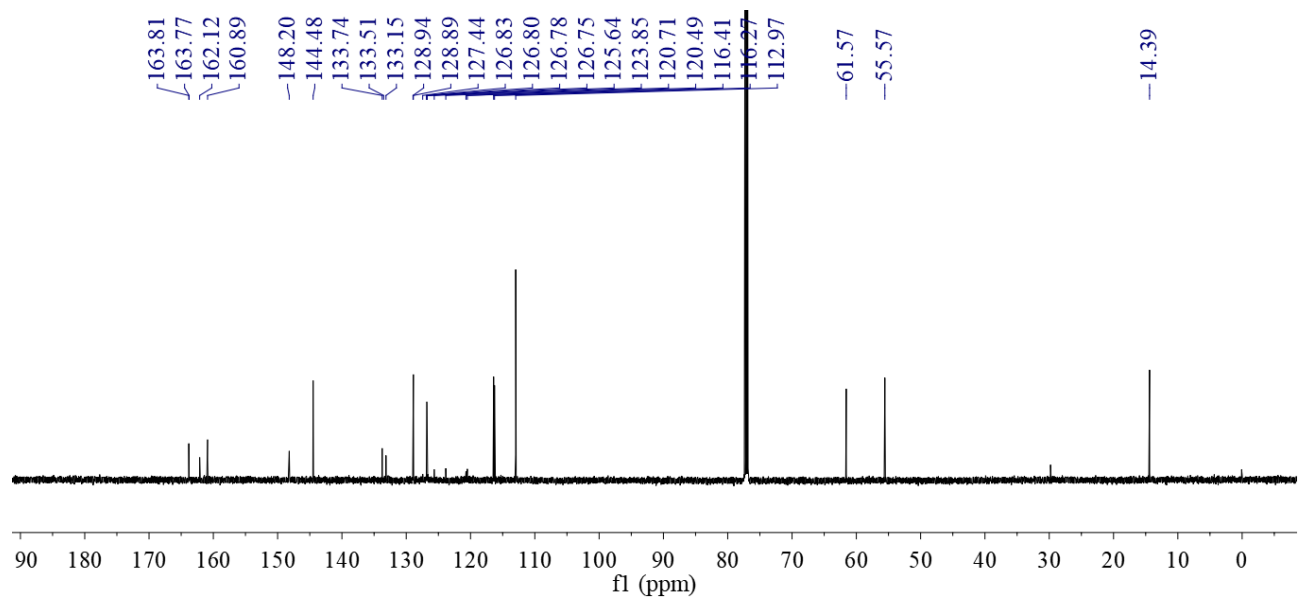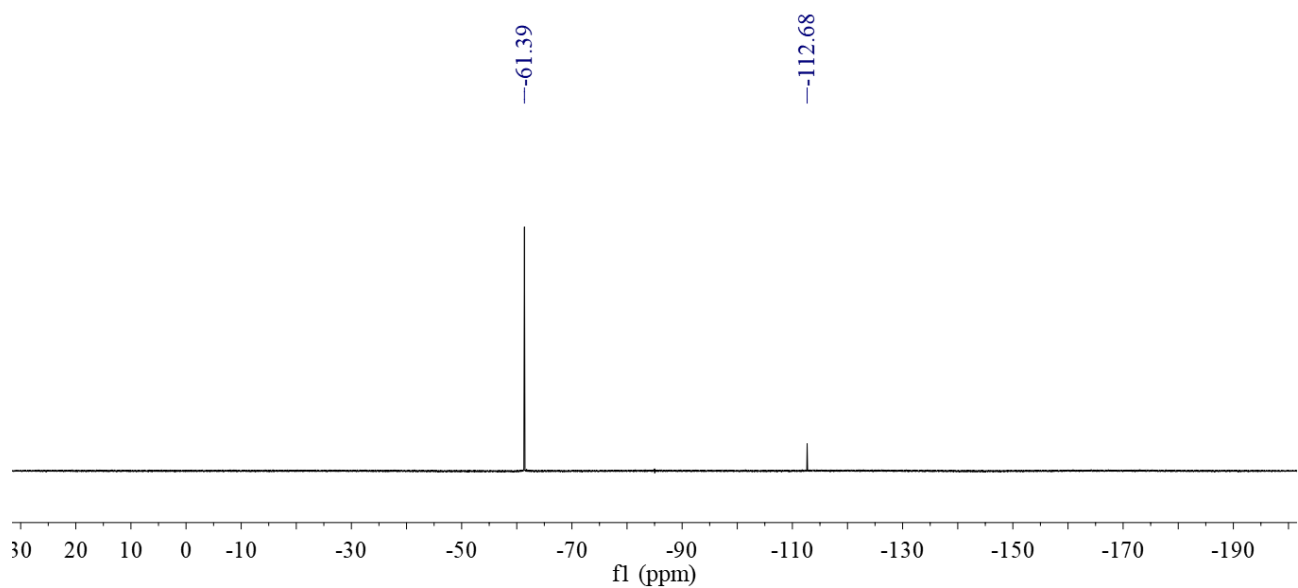

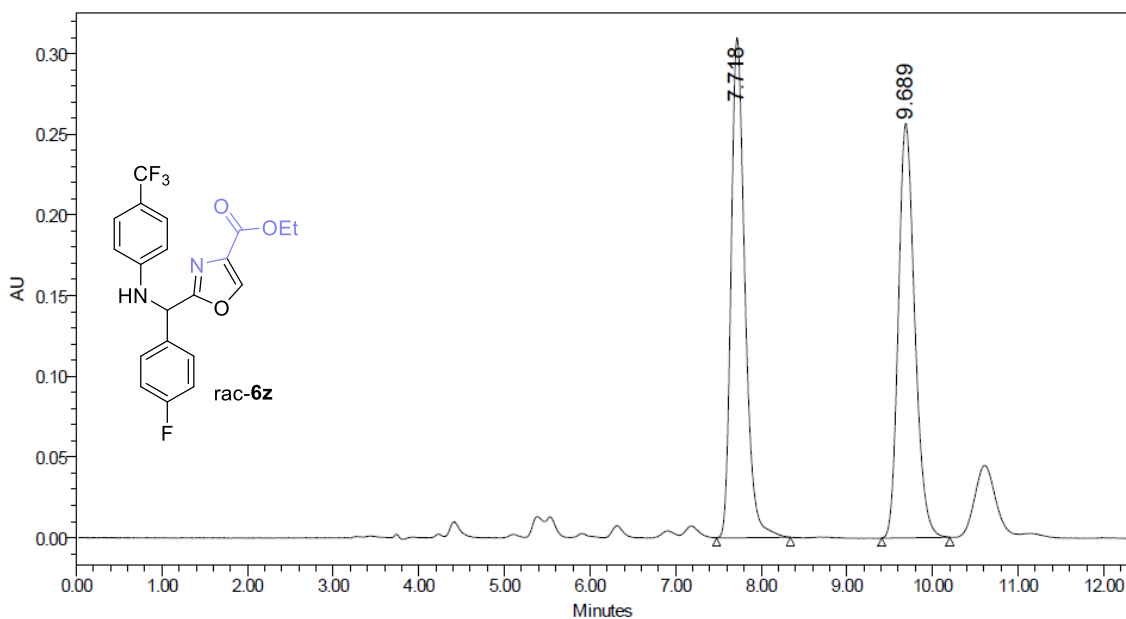

|   | RT<br>(min) | Peak<br>Type | Area<br>(μV*sec) | % Area | Height<br>(μV) | % Height | Integration<br>Type | Points<br>Across Peak | Start<br>Time<br>(min) | End<br>Time<br>(min) |
|---|-------------|--------------|------------------|--------|----------------|----------|---------------------|-----------------------|------------------------|----------------------|
| 1 | 7.718       | Unknown      | 3482899          | 50.49  | 309875         | 54.68    | BB                  | 519                   | 7.477                  | 8.342                |
| 2 | 9.689       | Unknown      | 3415538          | 49.51  | 256811         | 45.32    | BB                  | 477                   | 9.408                  | 10.203               |

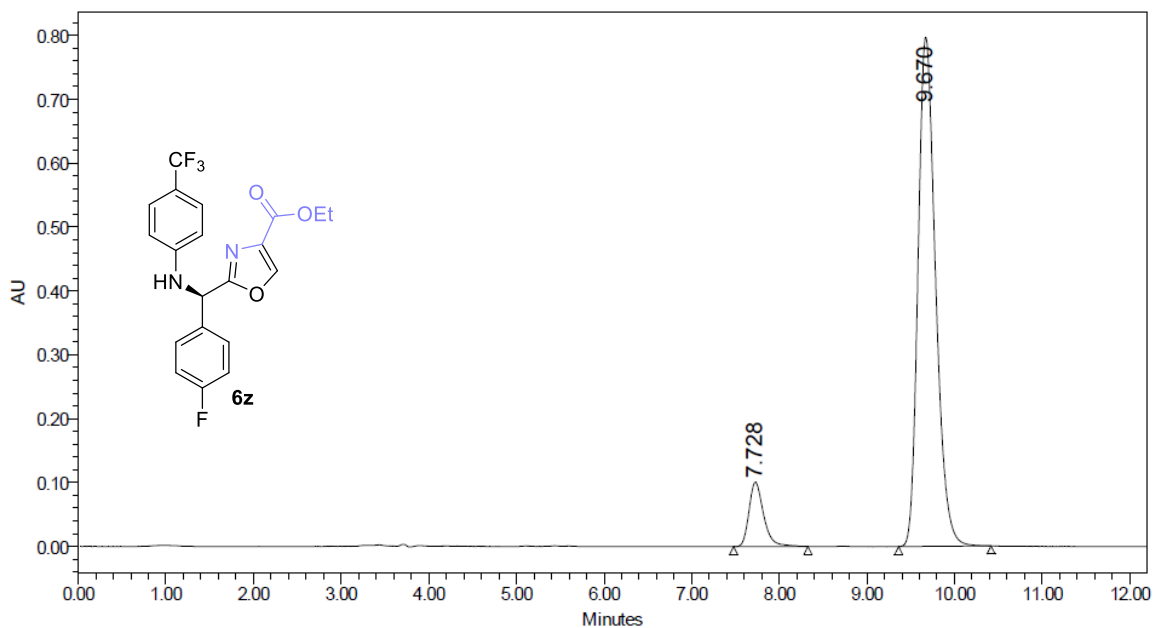

|   | RT<br>(min) | Peak<br>Type | Area<br>(μV*sec) | % Area | Height<br>(μV) | % Height | Integration<br>Type | Points<br>Across Peak | Start<br>Time<br>(min) | End<br>Time<br>(min) |
|---|-------------|--------------|------------------|--------|----------------|----------|---------------------|-----------------------|------------------------|----------------------|
| 1 | 7.728       | Unknown      | 1172023          | 9.58   | 100688         | 11.21    | BB                  | 508                   | 7.478                  | 8.325                |
| 2 | 9.670       | Unknown      | 11061418         | 90.42  | 797263         | 88.79    | BB                  | 632                   | 9.362                  | 10.415               |



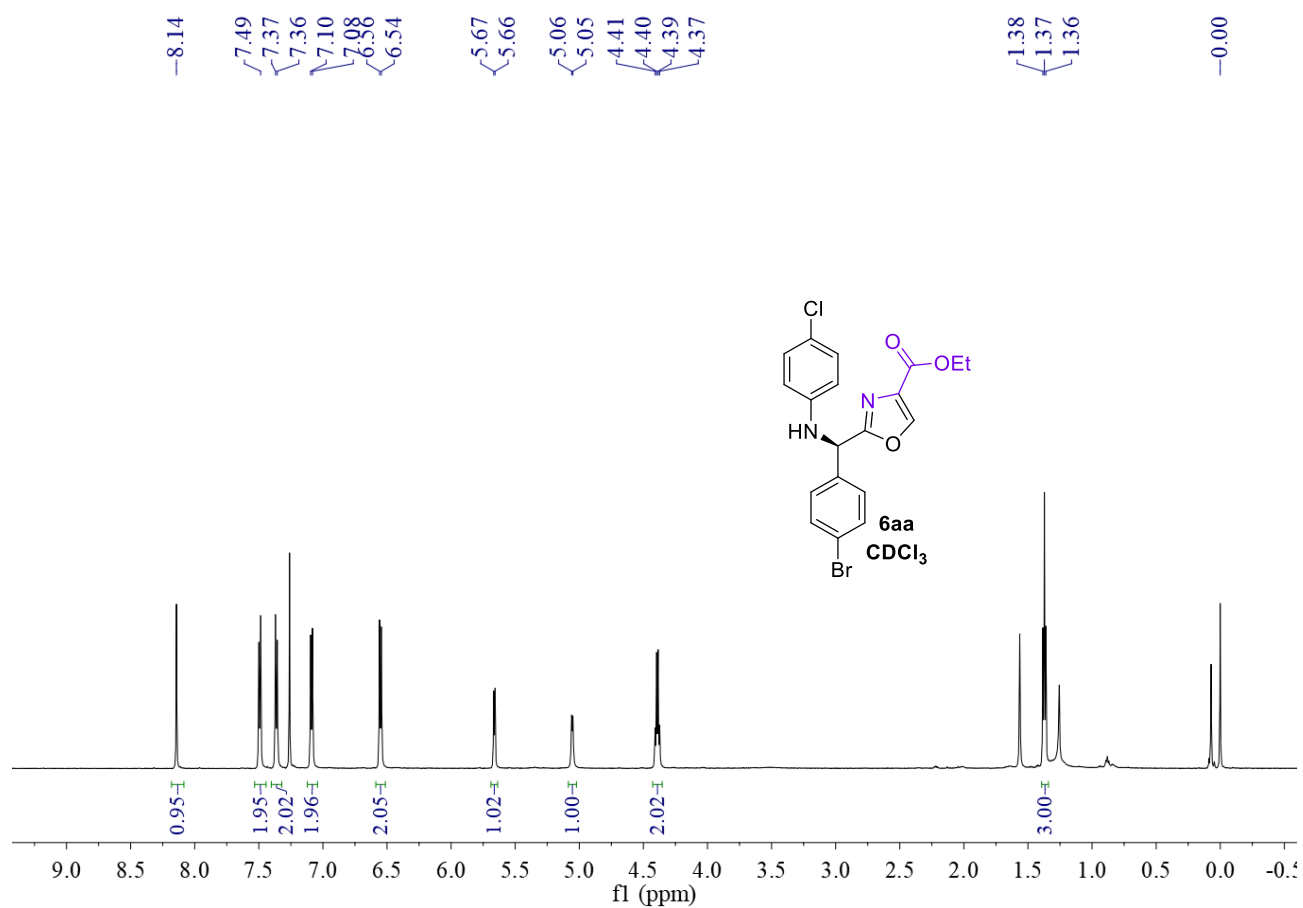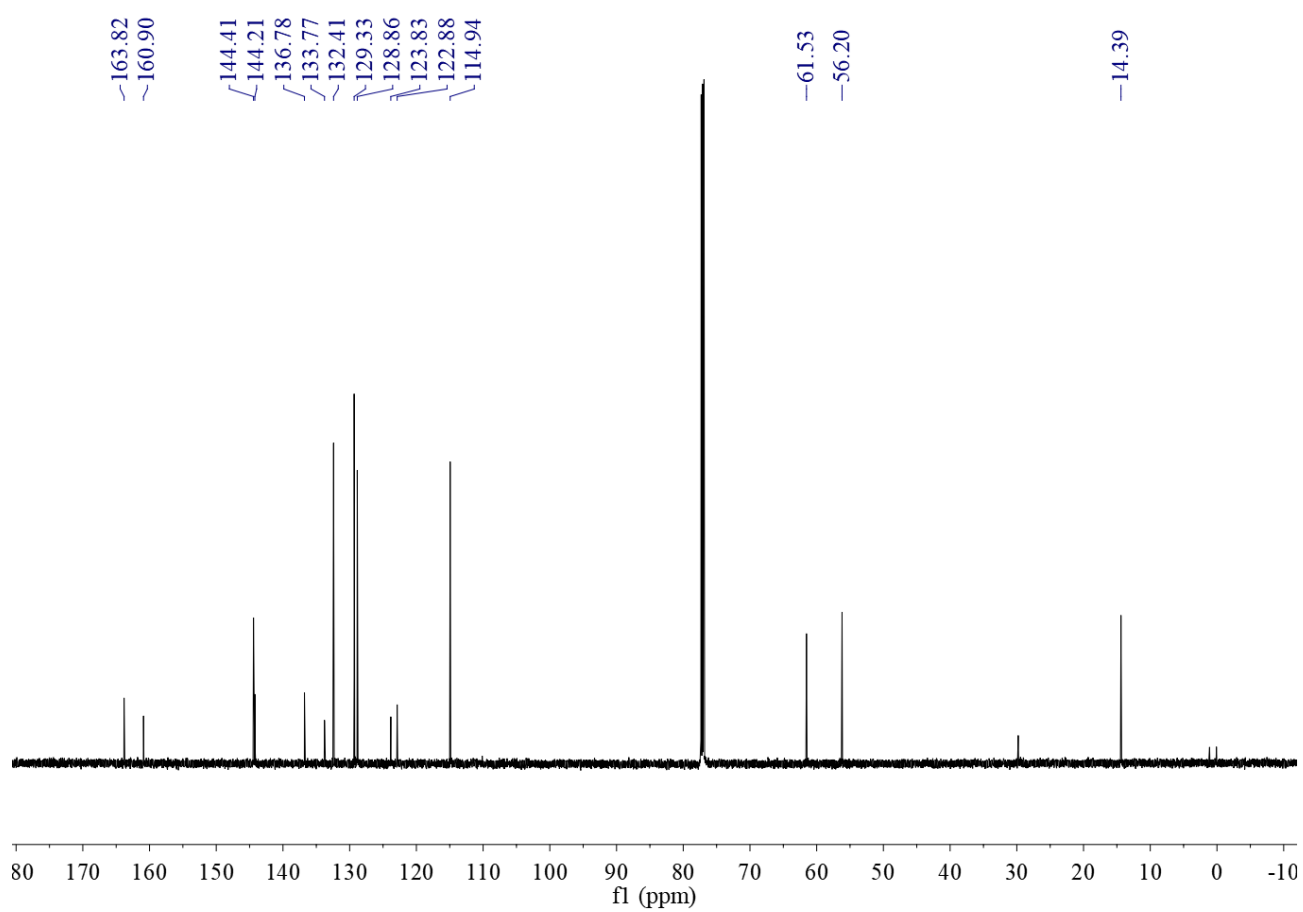

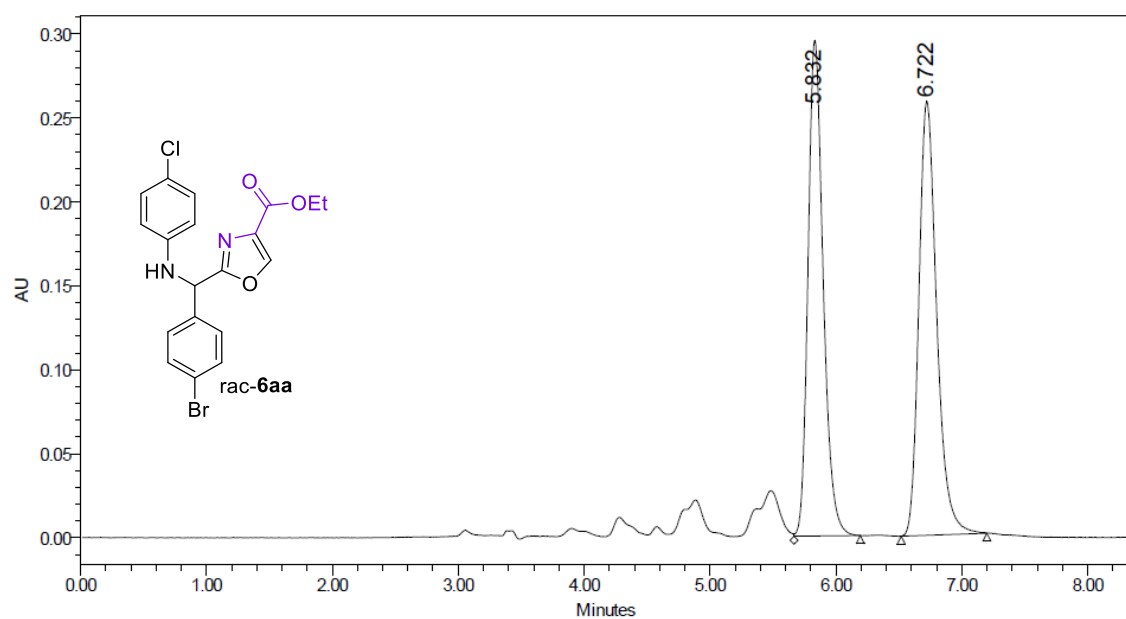

|   | RT (min) | Peak Type | Area (μV*sec) | % Area | Height (μV) | % Height | Integration Type | Points Across Peak | Start Time (min) | End Time (min) |
|---|----------|-----------|---------------|--------|-------------|----------|------------------|--------------------|------------------|----------------|
| 1 | 5.832    | Unknown   | 2468357       | 49.20  | 295260      | 53.32    | VB               | 316                | 5.667            | 6.193          |
| 2 | 6.722    | Unknown   | 2548437       | 50.80  | 258503      | 46.68    | BB               | 408                | 6.518            | 7.198          |

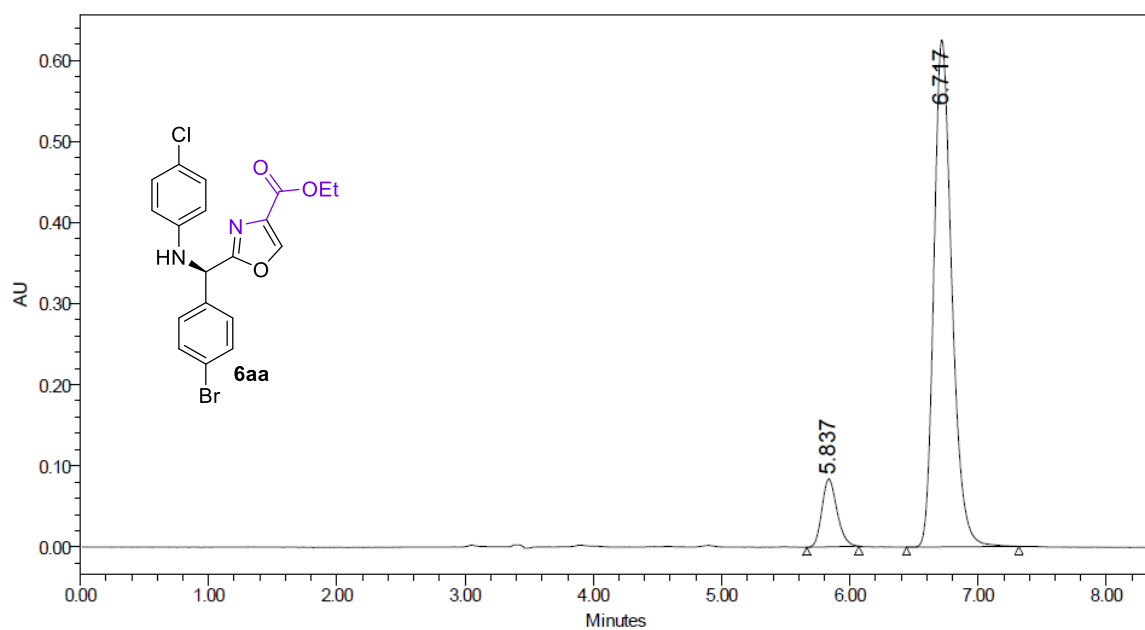

|   | RT (min) | Peak Type | Area (μV*sec) | % Area | Height (μV) | % Height | Integration Type | Points Across Peak | Start Time (min) | End Time (min) |
|---|----------|-----------|---------------|--------|-------------|----------|------------------|--------------------|------------------|----------------|
| 1 | 5.837    | Unknown   | 686617        | 10.15  | 83692       | 11.81    | bb               | 243                | 5.665            | 6.070          |
| 2 | 6.717    | Unknown   | 6075144       | 89.85  | 625130      | 88.19    | bb               | 526                | 6.442            | 7.318          |

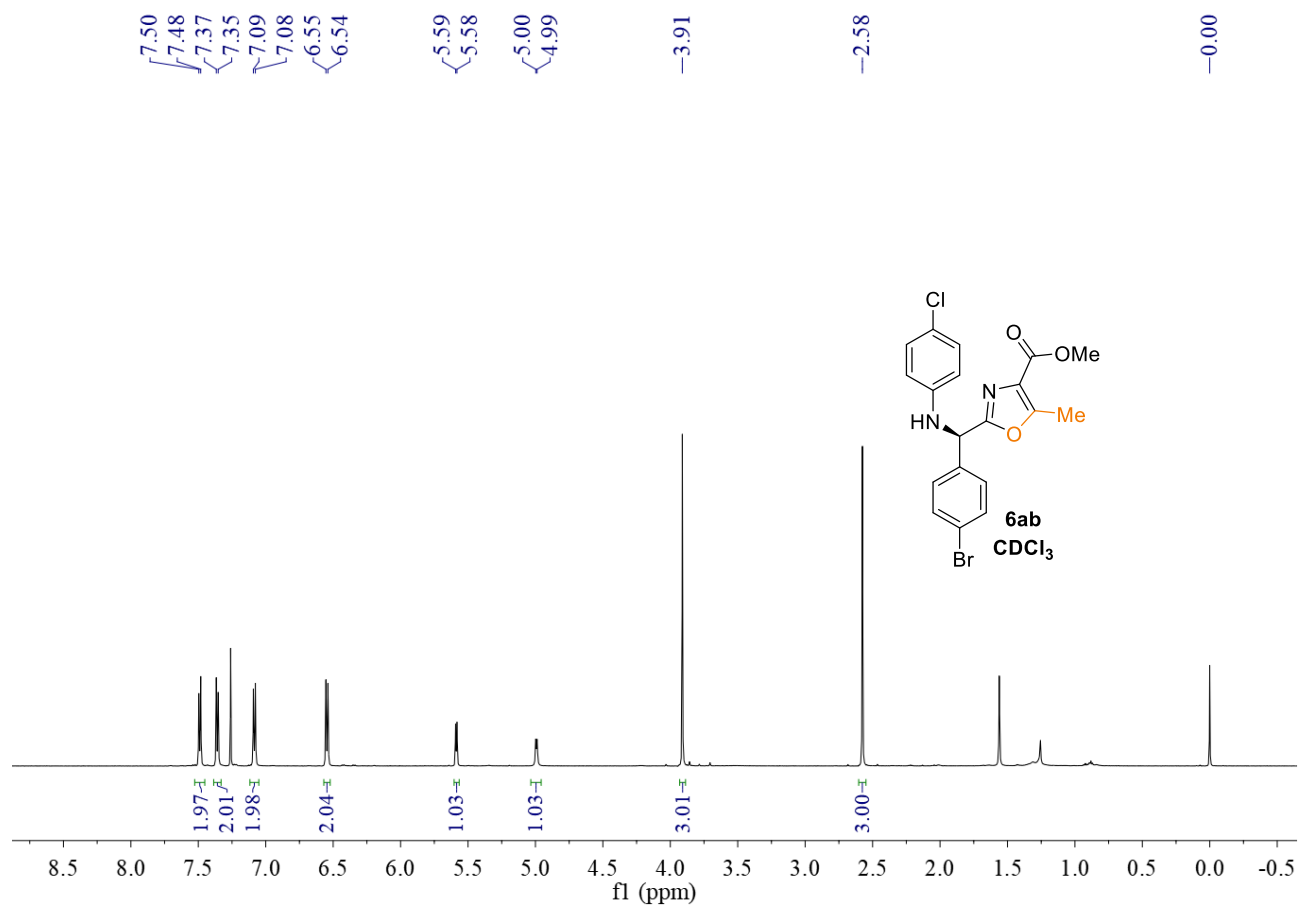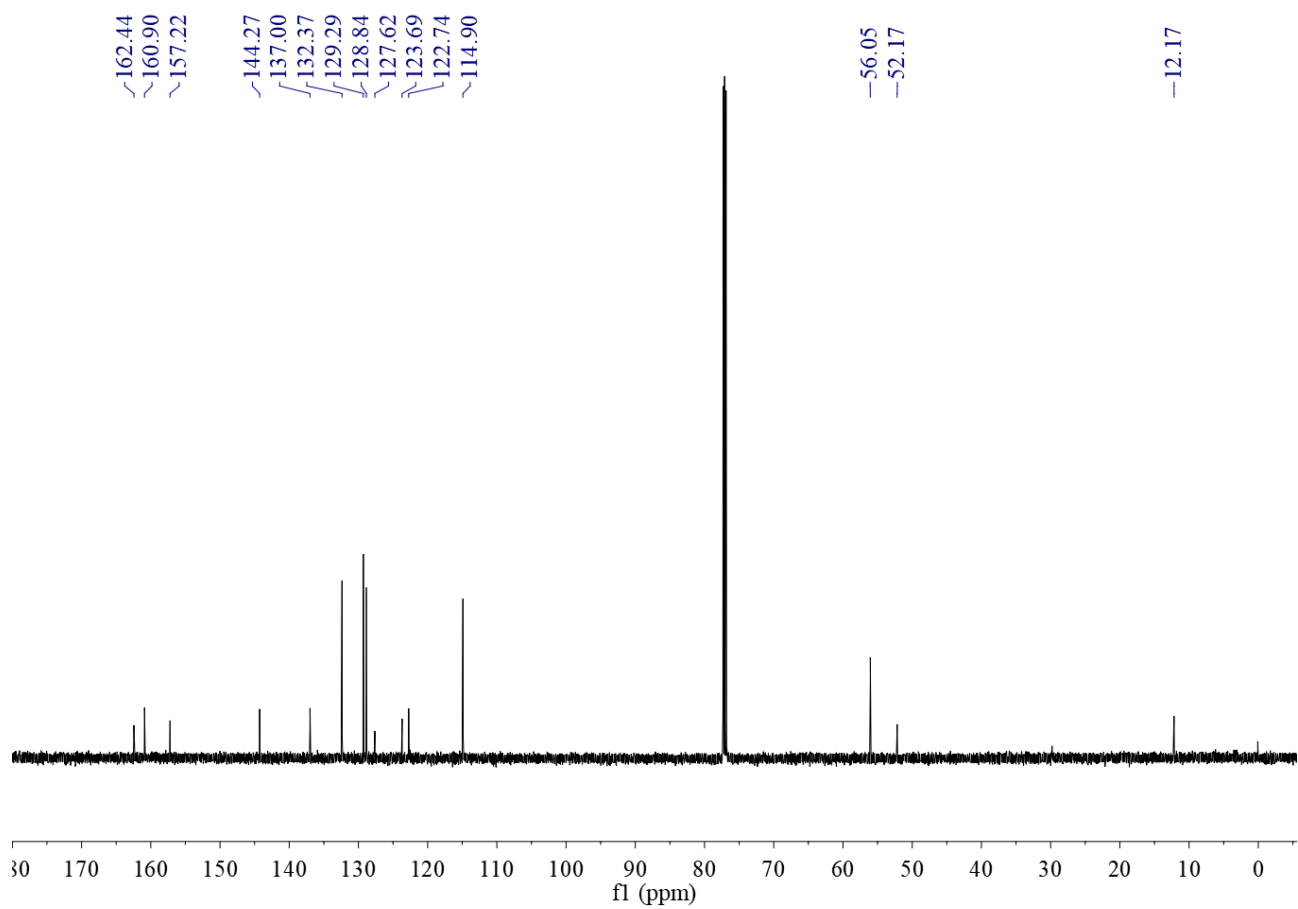

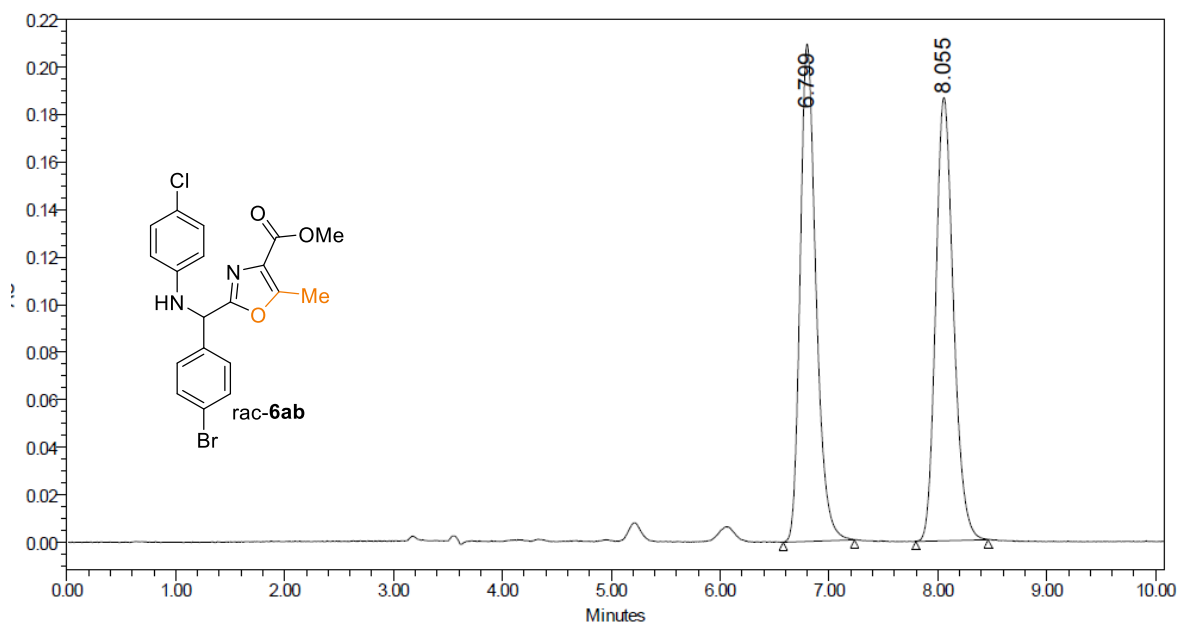

|   | RT<br>(min) | Area<br>( $\mu\text{V}\cdot\text{sec}$ ) | % Area | Height<br>( $\mu\text{V}$ ) | % Height |
|---|-------------|------------------------------------------|--------|-----------------------------|----------|
| 1 | 6.799       | 2119740                                  | 49.99  | 209261                      | 52.88    |
| 2 | 8.055       | 2120767                                  | 50.01  | 186463                      | 47.12    |

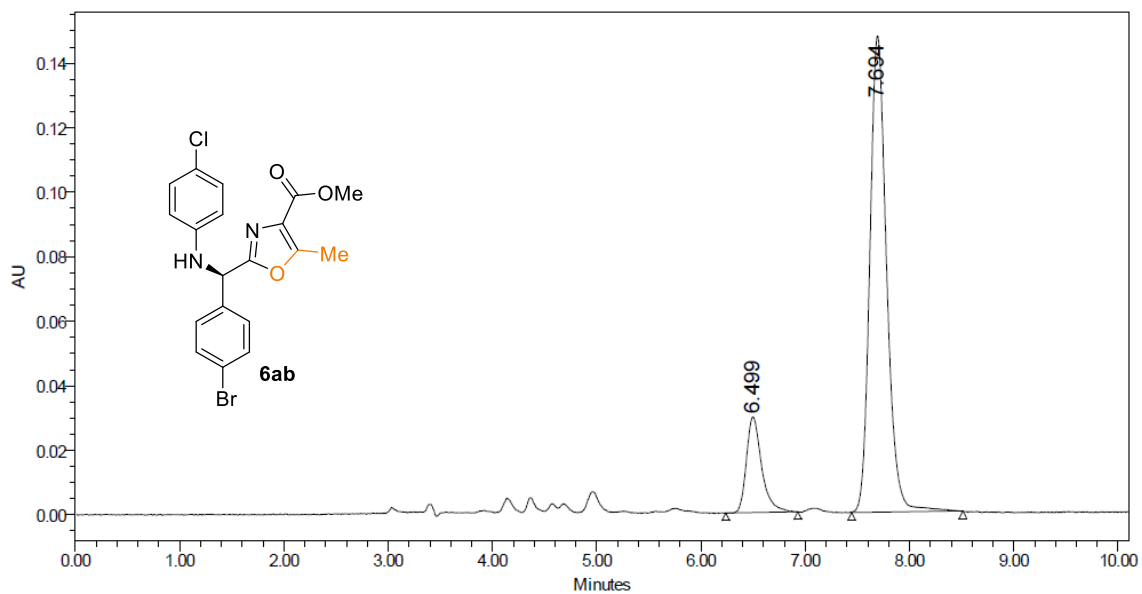

|   | RT<br>(min) | Area<br>( $\mu\text{V}\cdot\text{sec}$ ) | % Area | Height<br>( $\mu\text{V}$ ) | % Height |
|---|-------------|------------------------------------------|--------|-----------------------------|----------|
| 1 | 6.499       | 300229                                   | 15.43  | 29634                       | 16.72    |
| 2 | 7.694       | 1645872                                  | 84.57  | 147589                      | 83.28    |

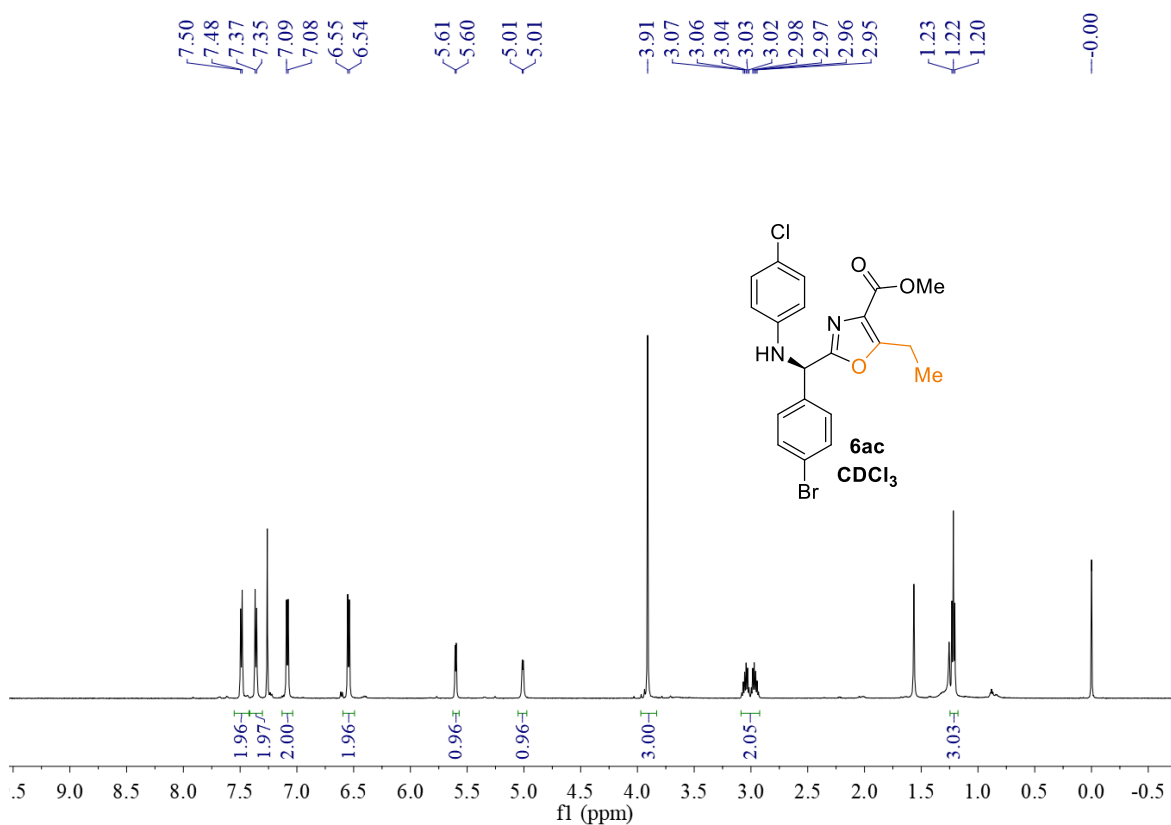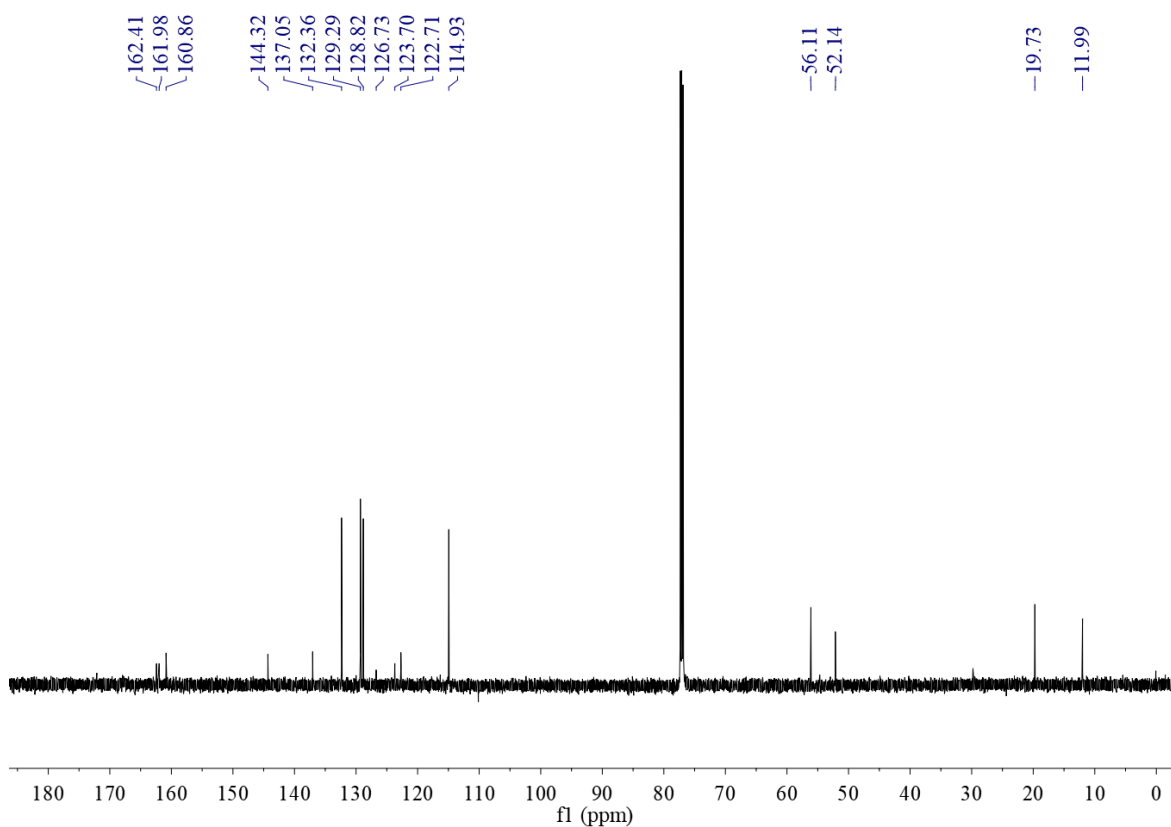

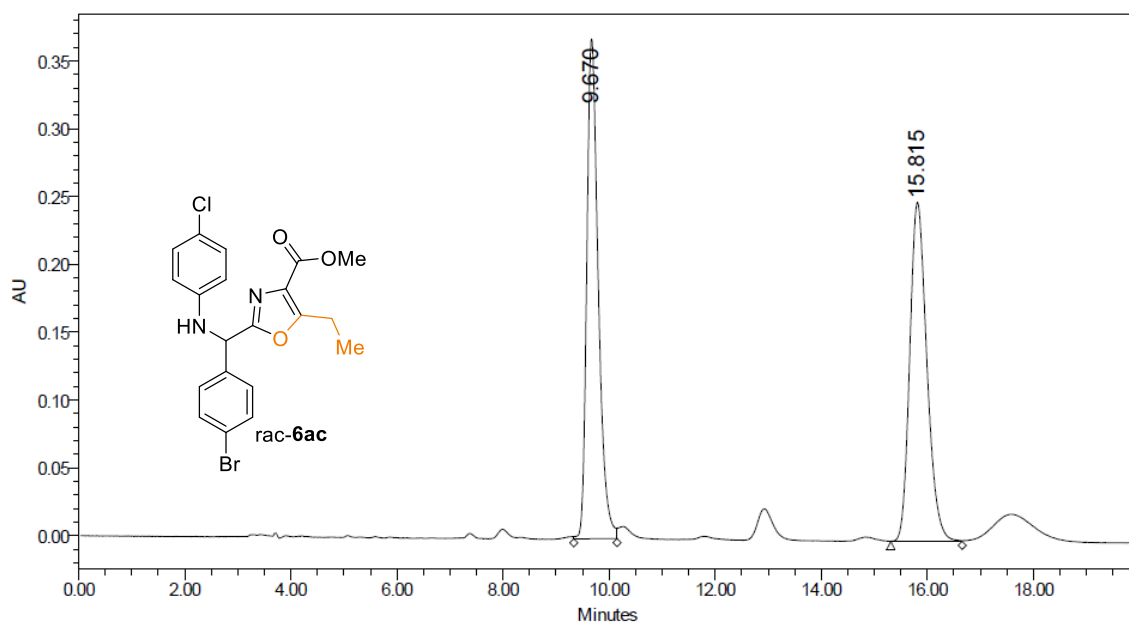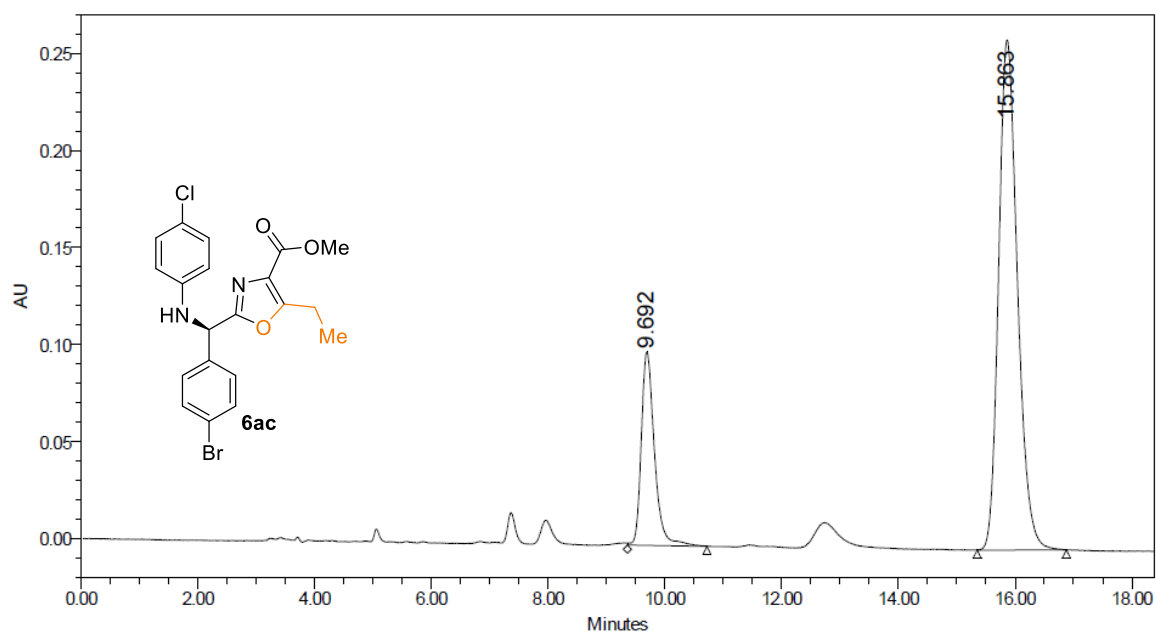

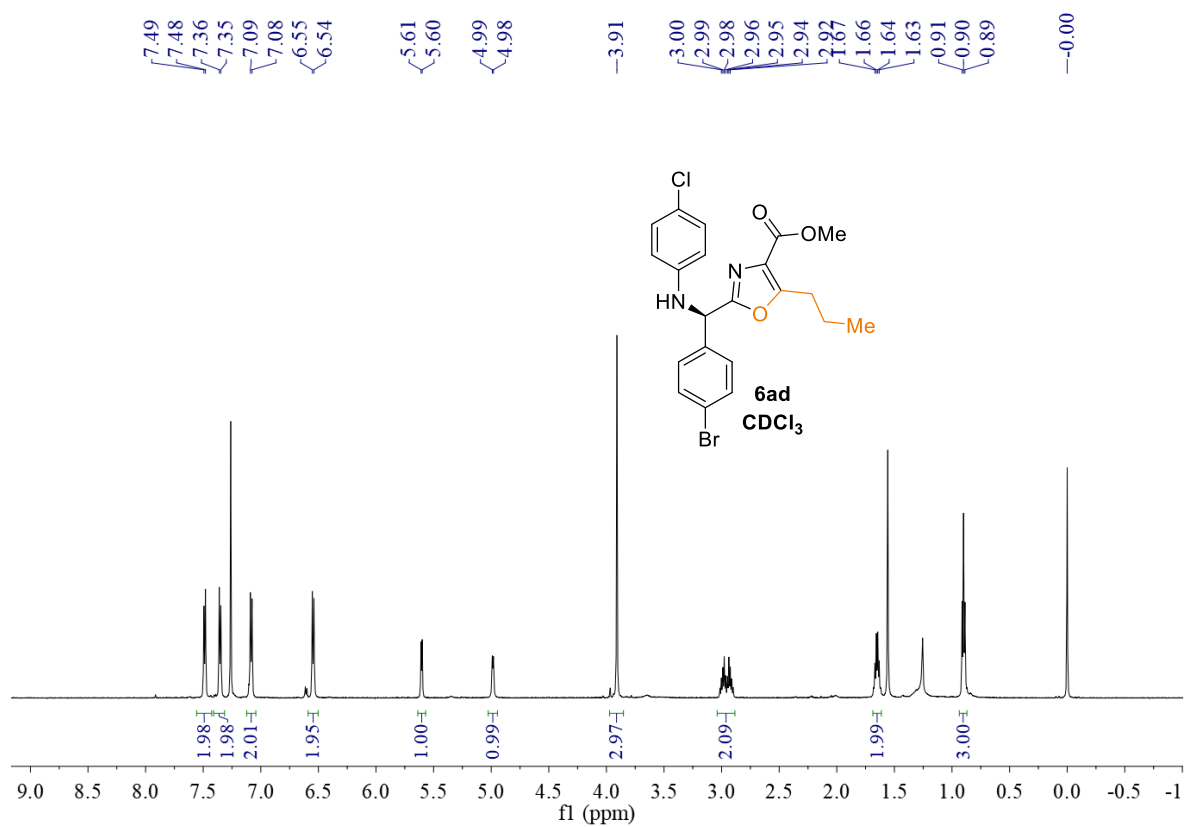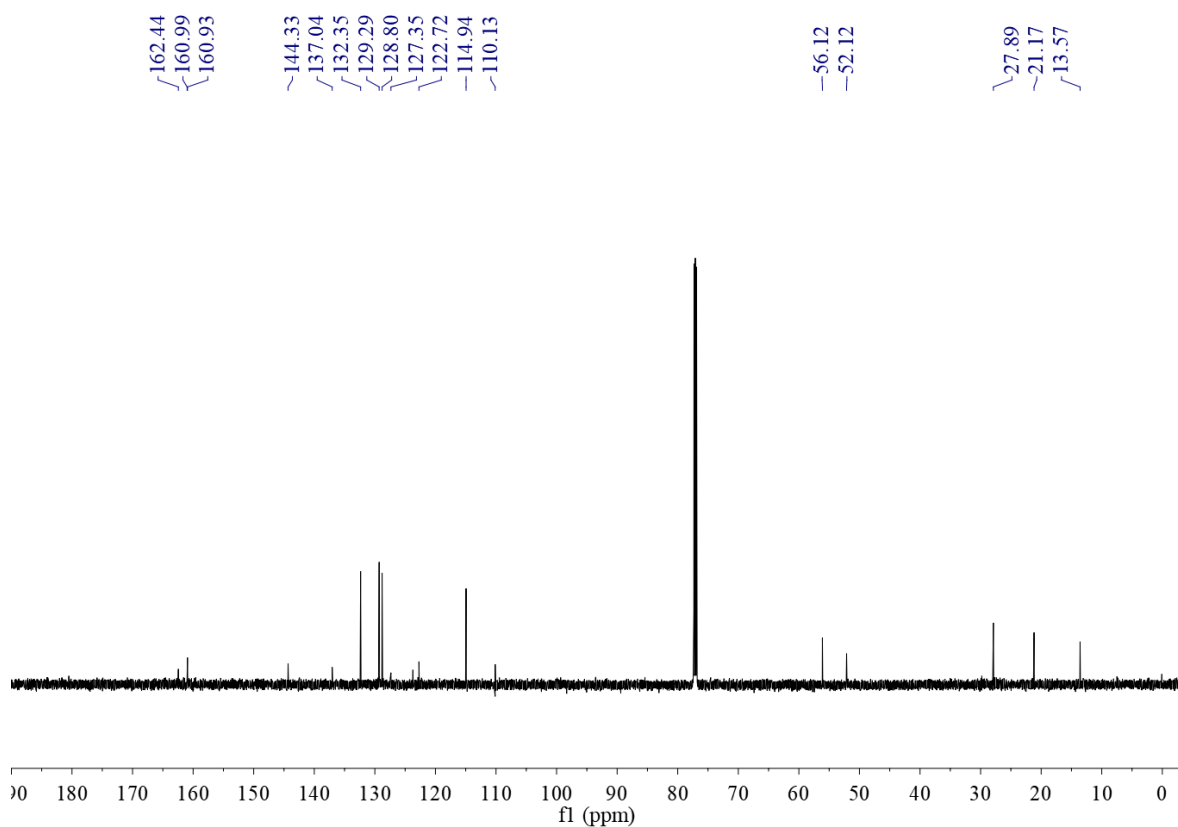

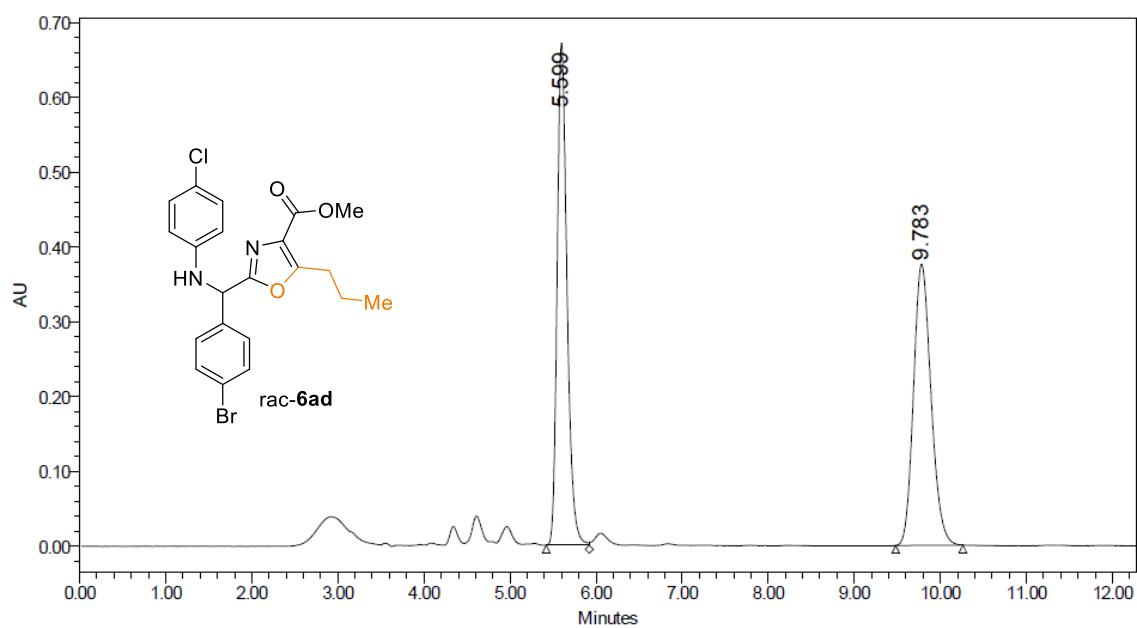

|   | RT (min) | Peak Type | Area (μV*sec) | % Area | Height (μV) | % Height | Integration Type | Points Across Peak | Start Time (min) | End Time (min) |
|---|----------|-----------|---------------|--------|-------------|----------|------------------|--------------------|------------------|----------------|
| 1 | 5.599    | Unknown   | 5325804       | 50.05  | 671192      | 64.11    | BV               | 300                | 5.422            | 5.922          |
| 2 | 9.783    | Unknown   | 5314123       | 49.95  | 375798      | 35.89    | BB               | 468                | 9.482            | 10.262         |

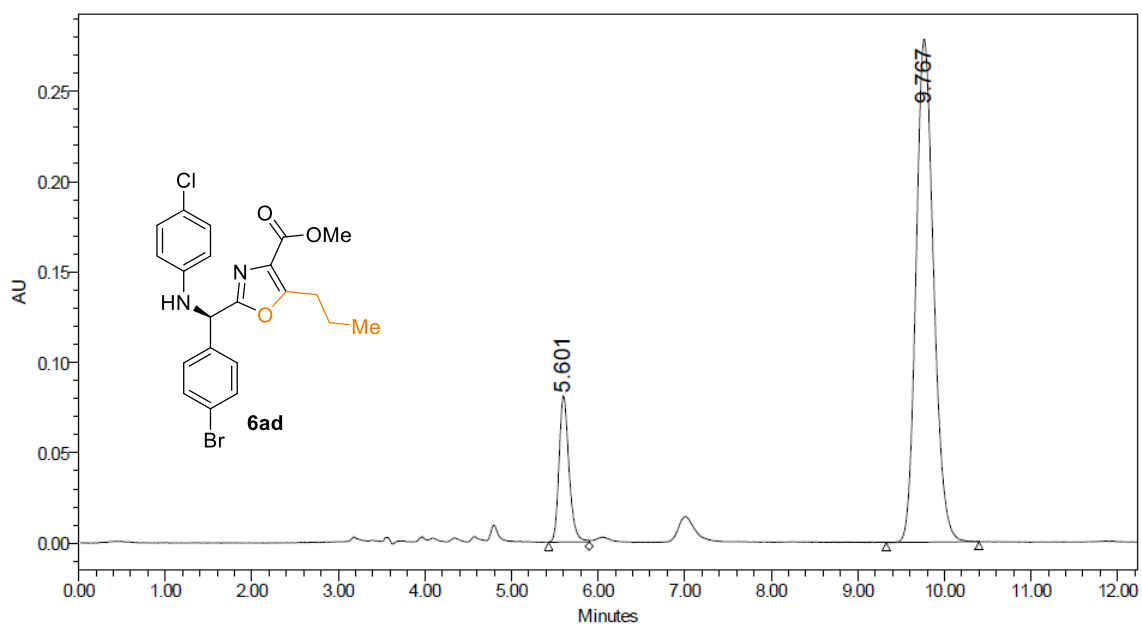

|   | RT (min) | Peak Type | Area (μV*sec) | % Area | Height (μV) | % Height | Integration Type | Points Across Peak | Start Time (min) | End Time (min) |
|---|----------|-----------|---------------|--------|-------------|----------|------------------|--------------------|------------------|----------------|
| 1 | 5.601    | Unknown   | 647164        | 14.14  | 80745       | 22.49    | BV               | 281                | 5.428            | 5.897          |
| 2 | 9.767    | Unknown   | 3928812       | 85.86  | 278324      | 77.51    | bb               | 643                | 9.328            | 10.400         |



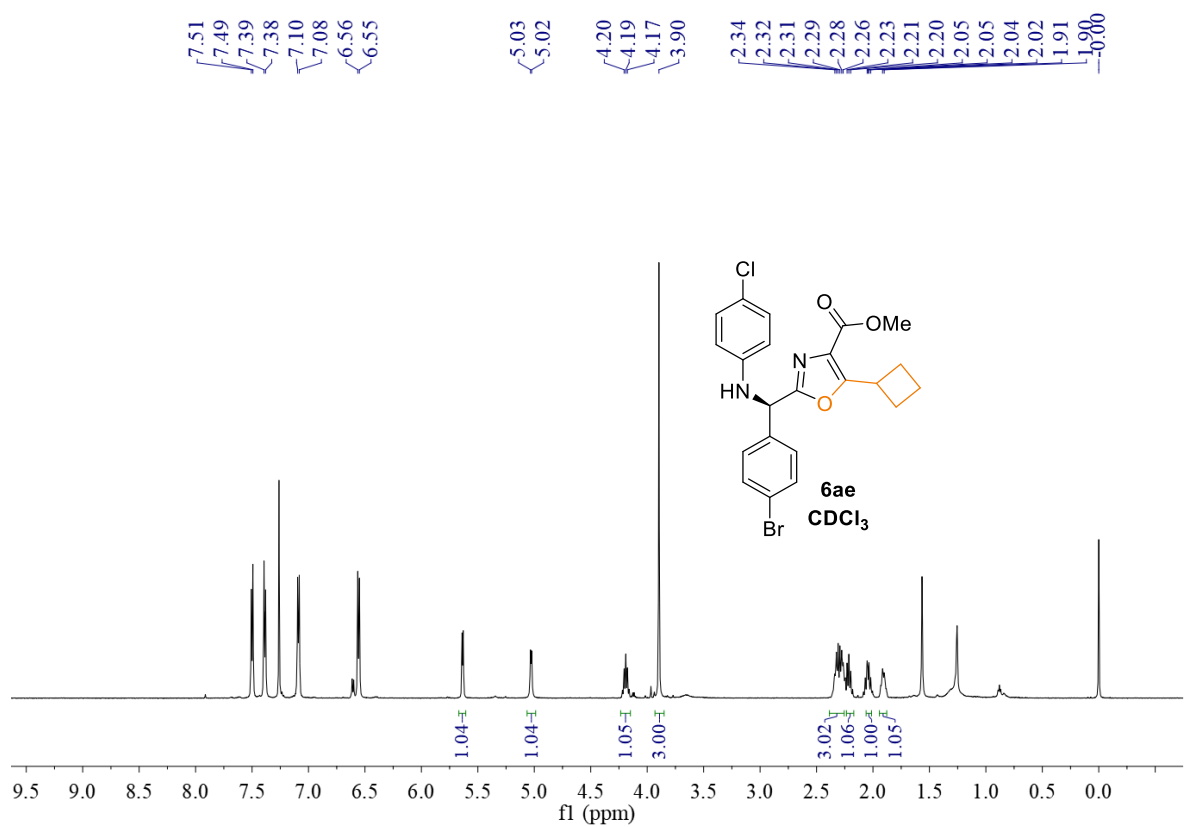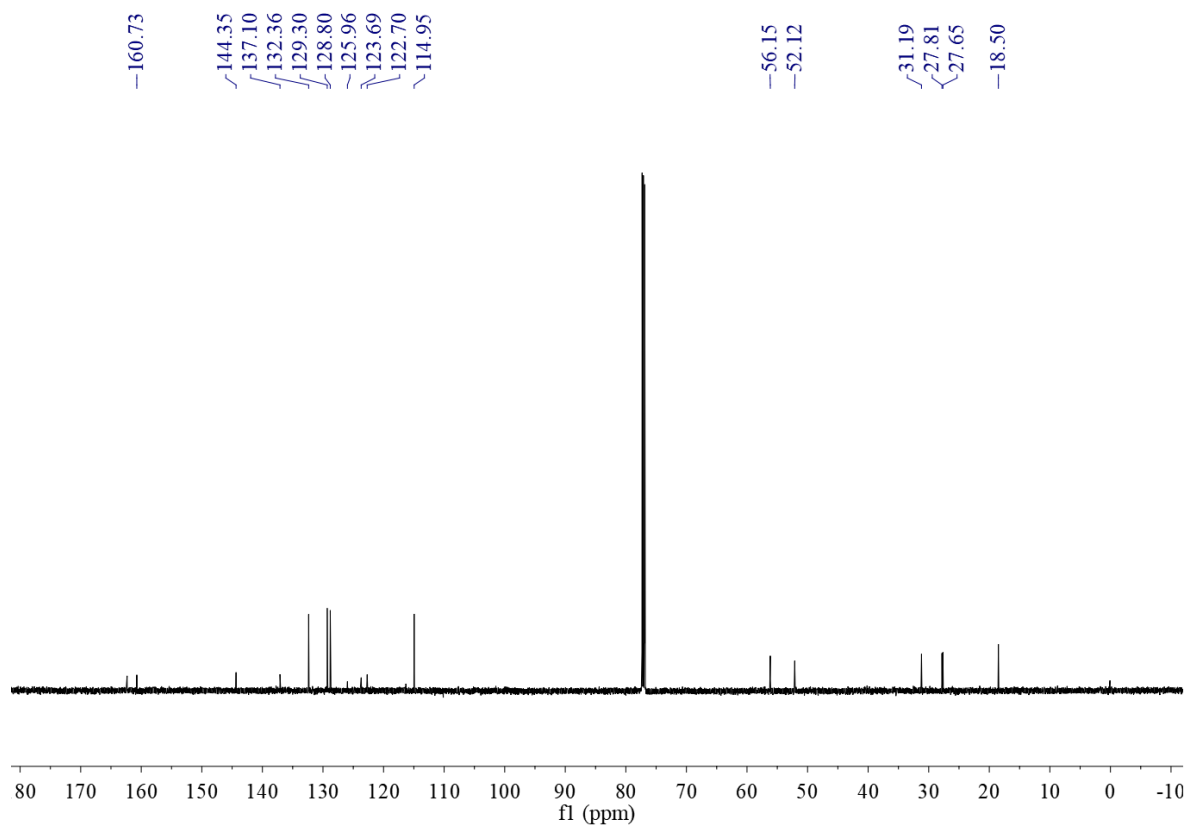

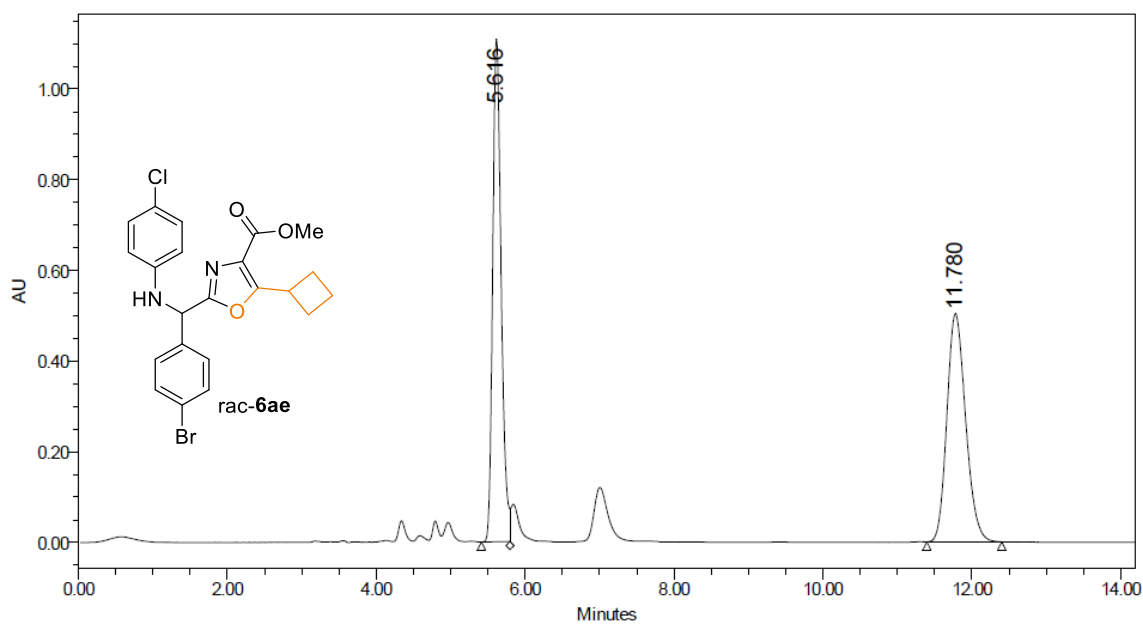

|   | RT (min) | Peak Type | Area (μV*sec) | % Area | Height (μV) | % Height | Integration Type | Points Across Peak | Start Time (min) | End Time (min) |
|---|----------|-----------|---------------|--------|-------------|----------|------------------|--------------------|------------------|----------------|
| 1 | 5.616    | Unknown   | 8743051       | 49.78  | 1108615     | 68.79    | BV               | 230                | 5.413            | 5.797          |
| 2 | 11.780   | Unknown   | 8819711       | 50.22  | 502942      | 31.21    | BB               | 603                | 11.397           | 12.402         |

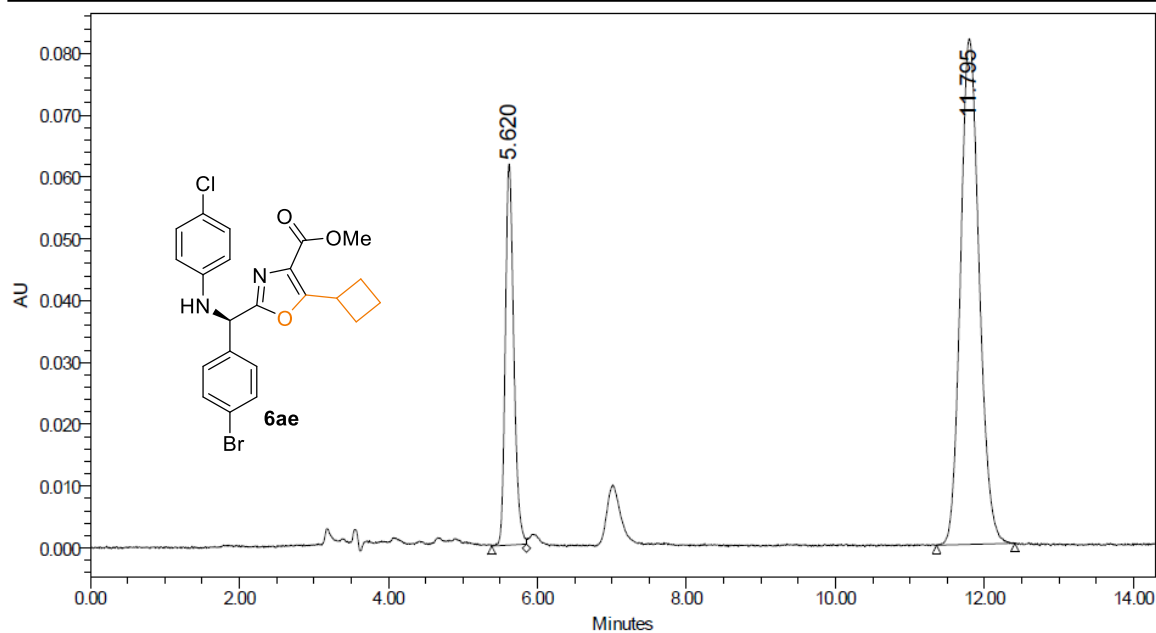

|   | RT (min) | Peak Type | Area (μV*sec) | % Area | Height (μV) | % Height | Integration Type | Points Across Peak | Start Time (min) | End Time (min) |
|---|----------|-----------|---------------|--------|-------------|----------|------------------|--------------------|------------------|----------------|
| 1 | 5.620    | Unknown   | 488140        | 25.48  | 61640       | 42.97    | BV               | 279                | 5.387            | 5.852          |
| 2 | 11.795   | Unknown   | 1427801       | 74.52  | 81809       | 57.03    | bb               | 630                | 11.357           | 12.407         |

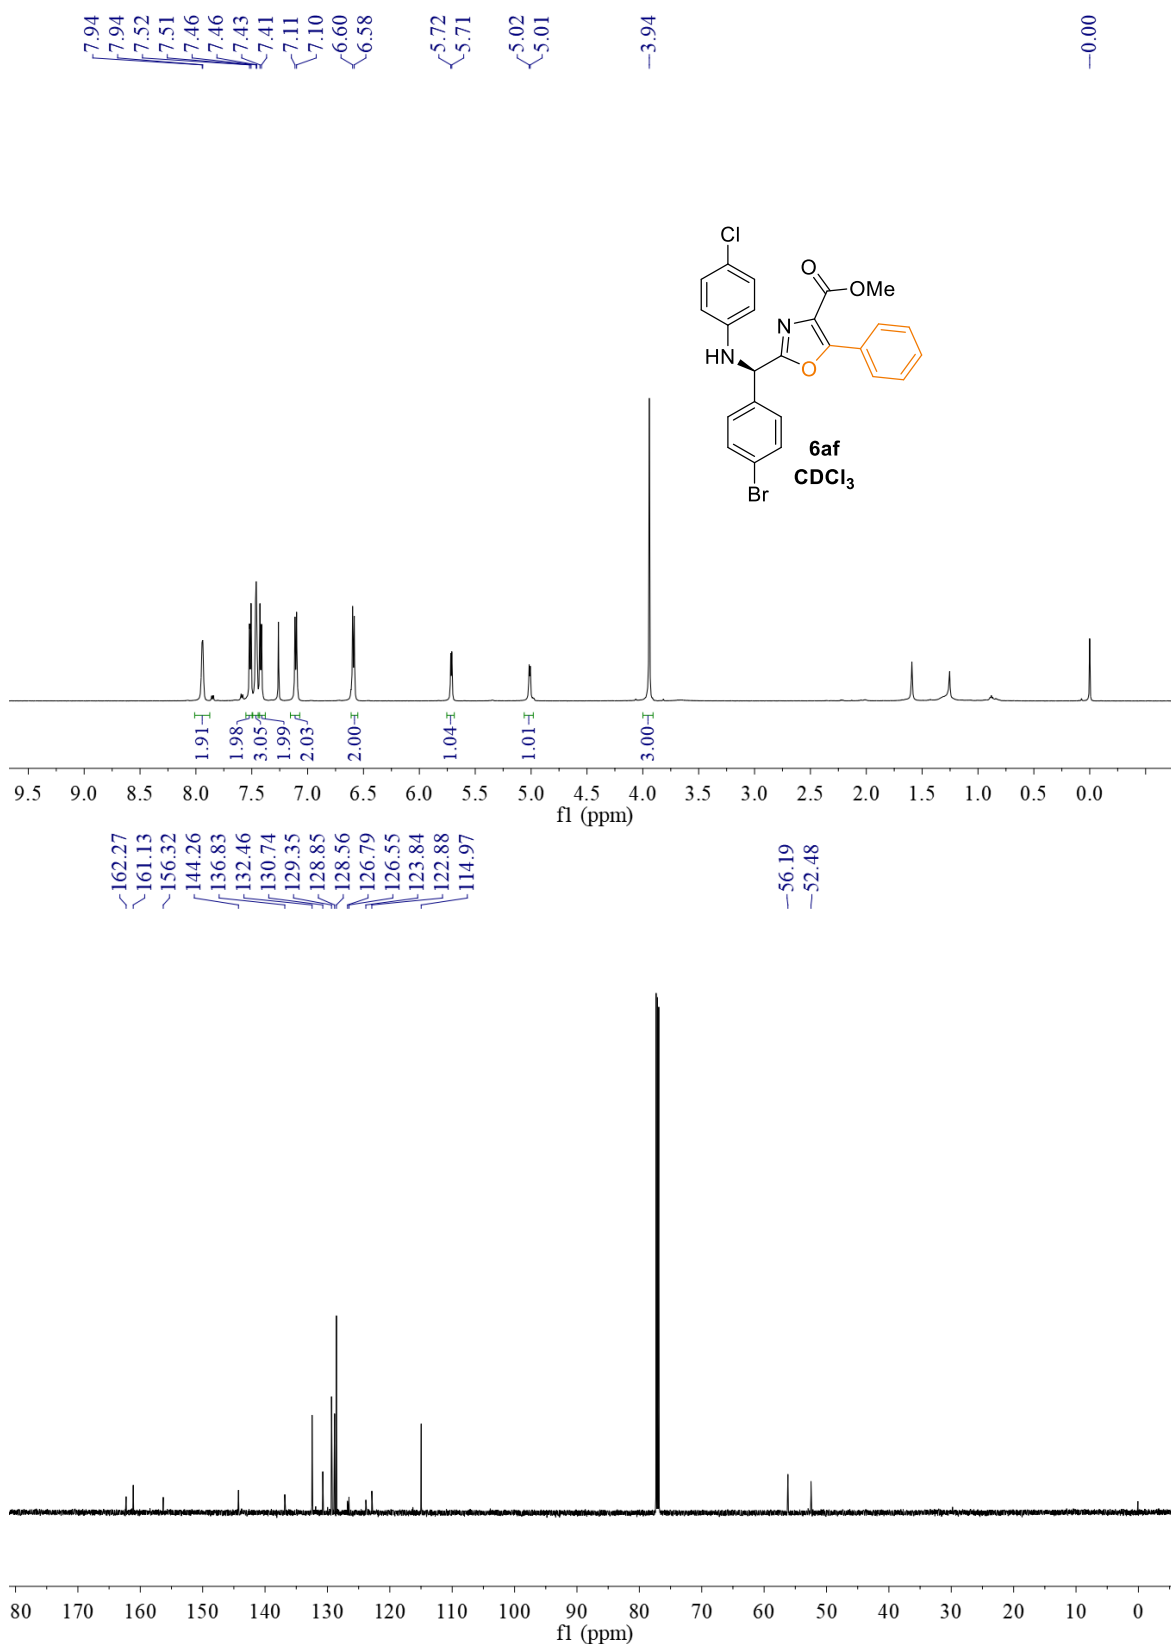

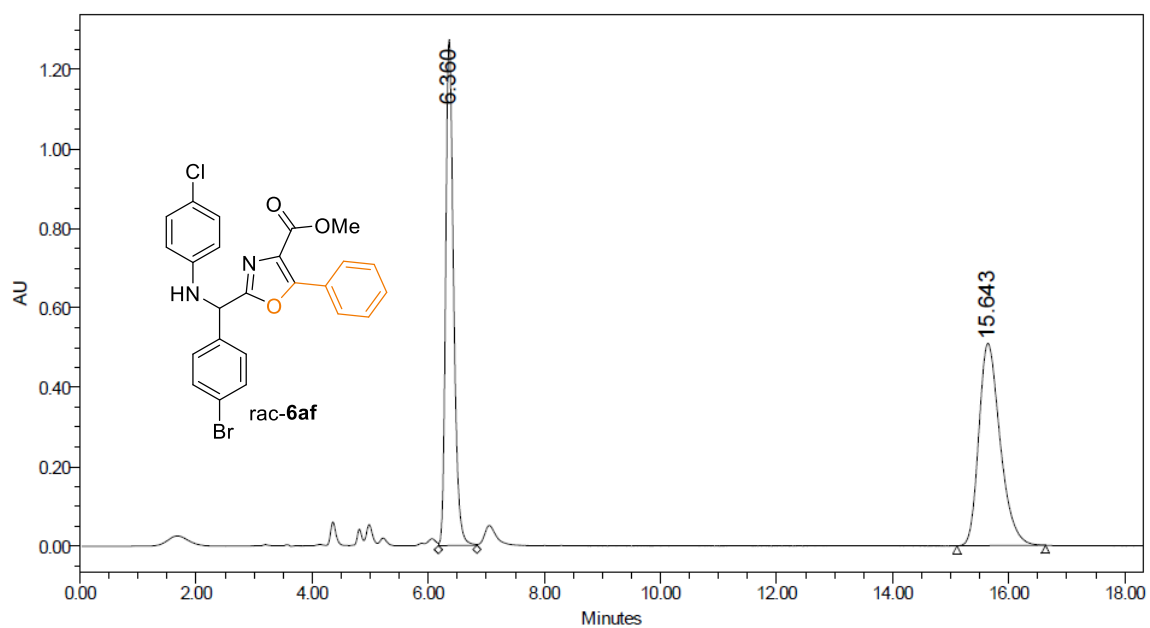

|   | RT (min) | Peak Type | Area (μV*sec) | % Area | Height (μV) | % Height | Integration Type | Points Across Peak | Start Time (min) |
|---|----------|-----------|---------------|--------|-------------|----------|------------------|--------------------|------------------|
| 1 | 6.360    | Unknown   | 12090148      | 48.23  | 1273493     | 71.45    | VV               | 400                | 6.175            |
| 2 | 15.643   | Unknown   | 12978803      | 51.77  | 508875      | 28.55    | BB               | 915                | 15.110           |

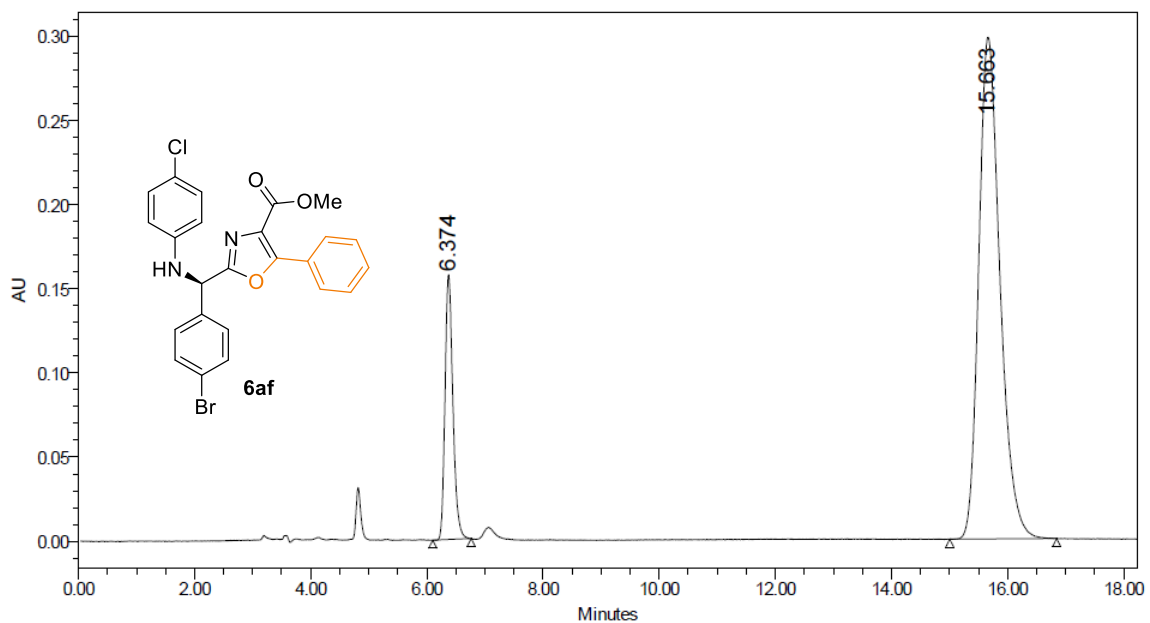

|   | RT (min) | Peak Type | Area (μV*sec) | % Area | Height (μV) | % Height | Integration Type | Points Across Peak | Start Time (min) | End Time (min) |
|---|----------|-----------|---------------|--------|-------------|----------|------------------|--------------------|------------------|----------------|
| 1 | 6.374    | Unknown   | 1483428       | 16.37  | 157413      | 34.57    | bb               | 397                | 6.102            | 6.763          |
| 2 | 15.663   | Unknown   | 7578644       | 83.63  | 297990      | 65.43    | bb               | 1105               | 15.005           | 16.847         |

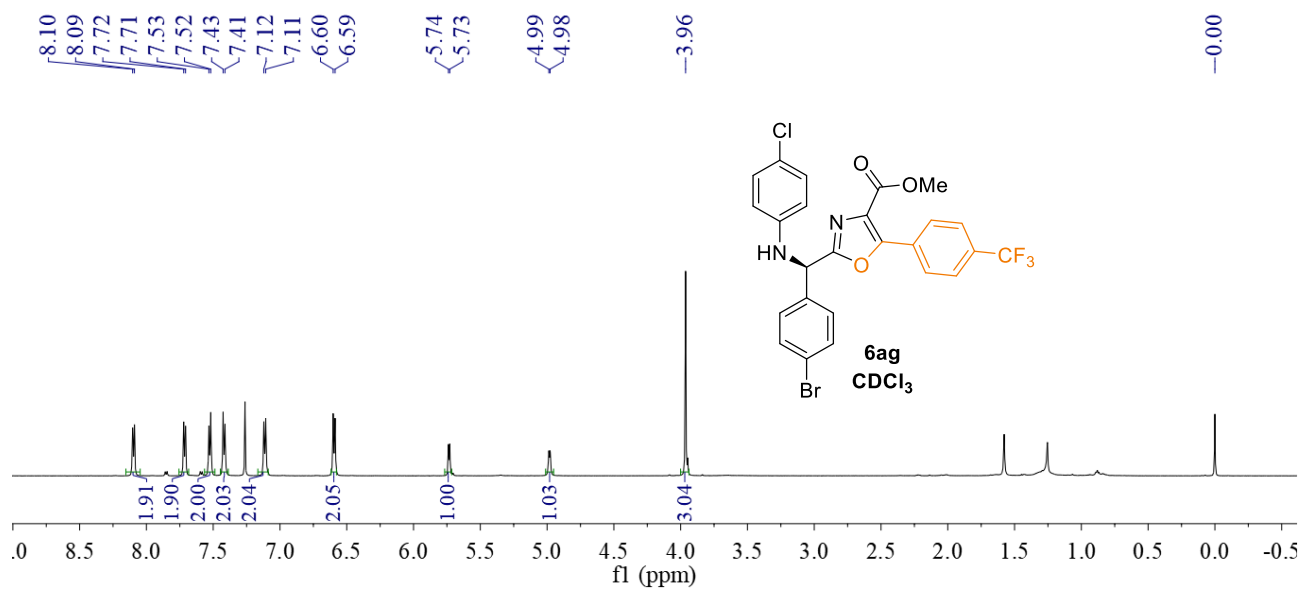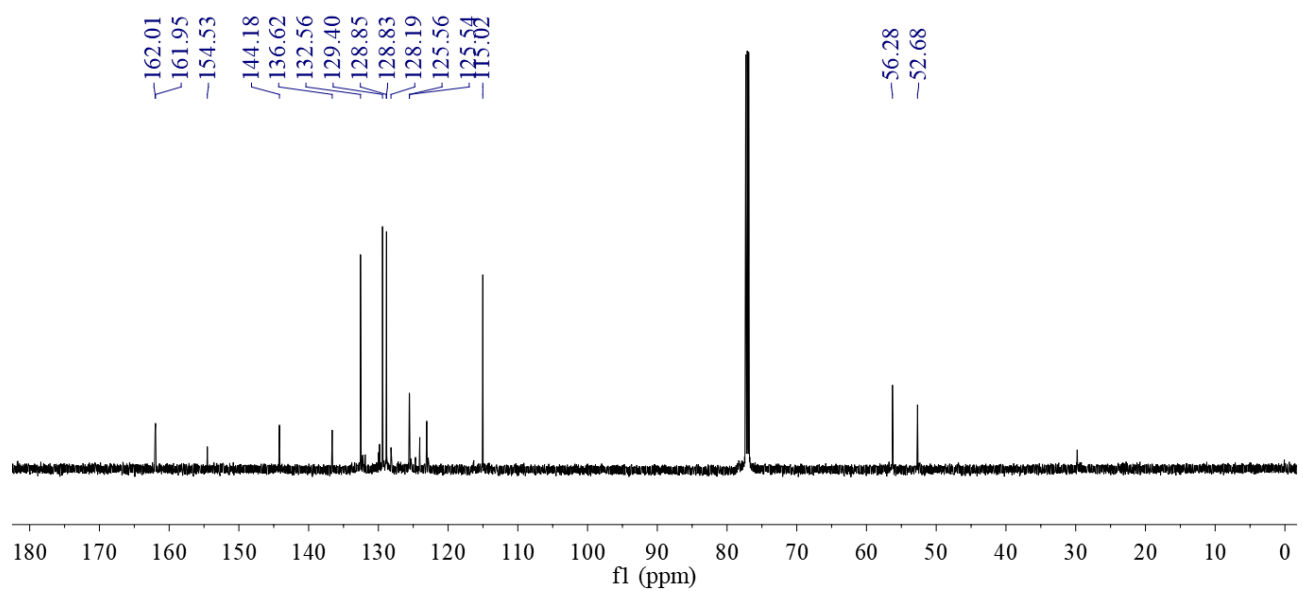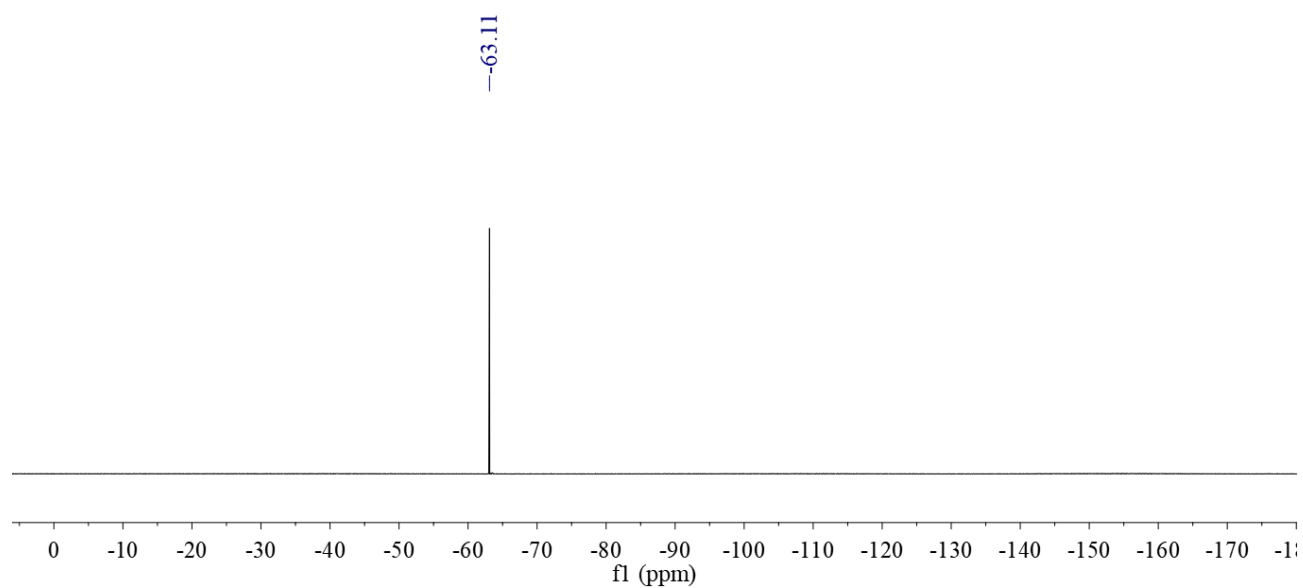

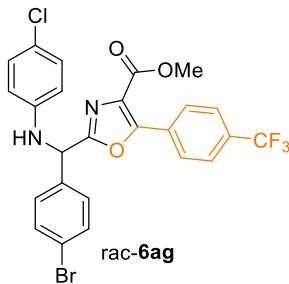

**rac-6ag**

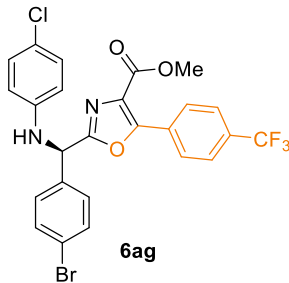

**6ag**

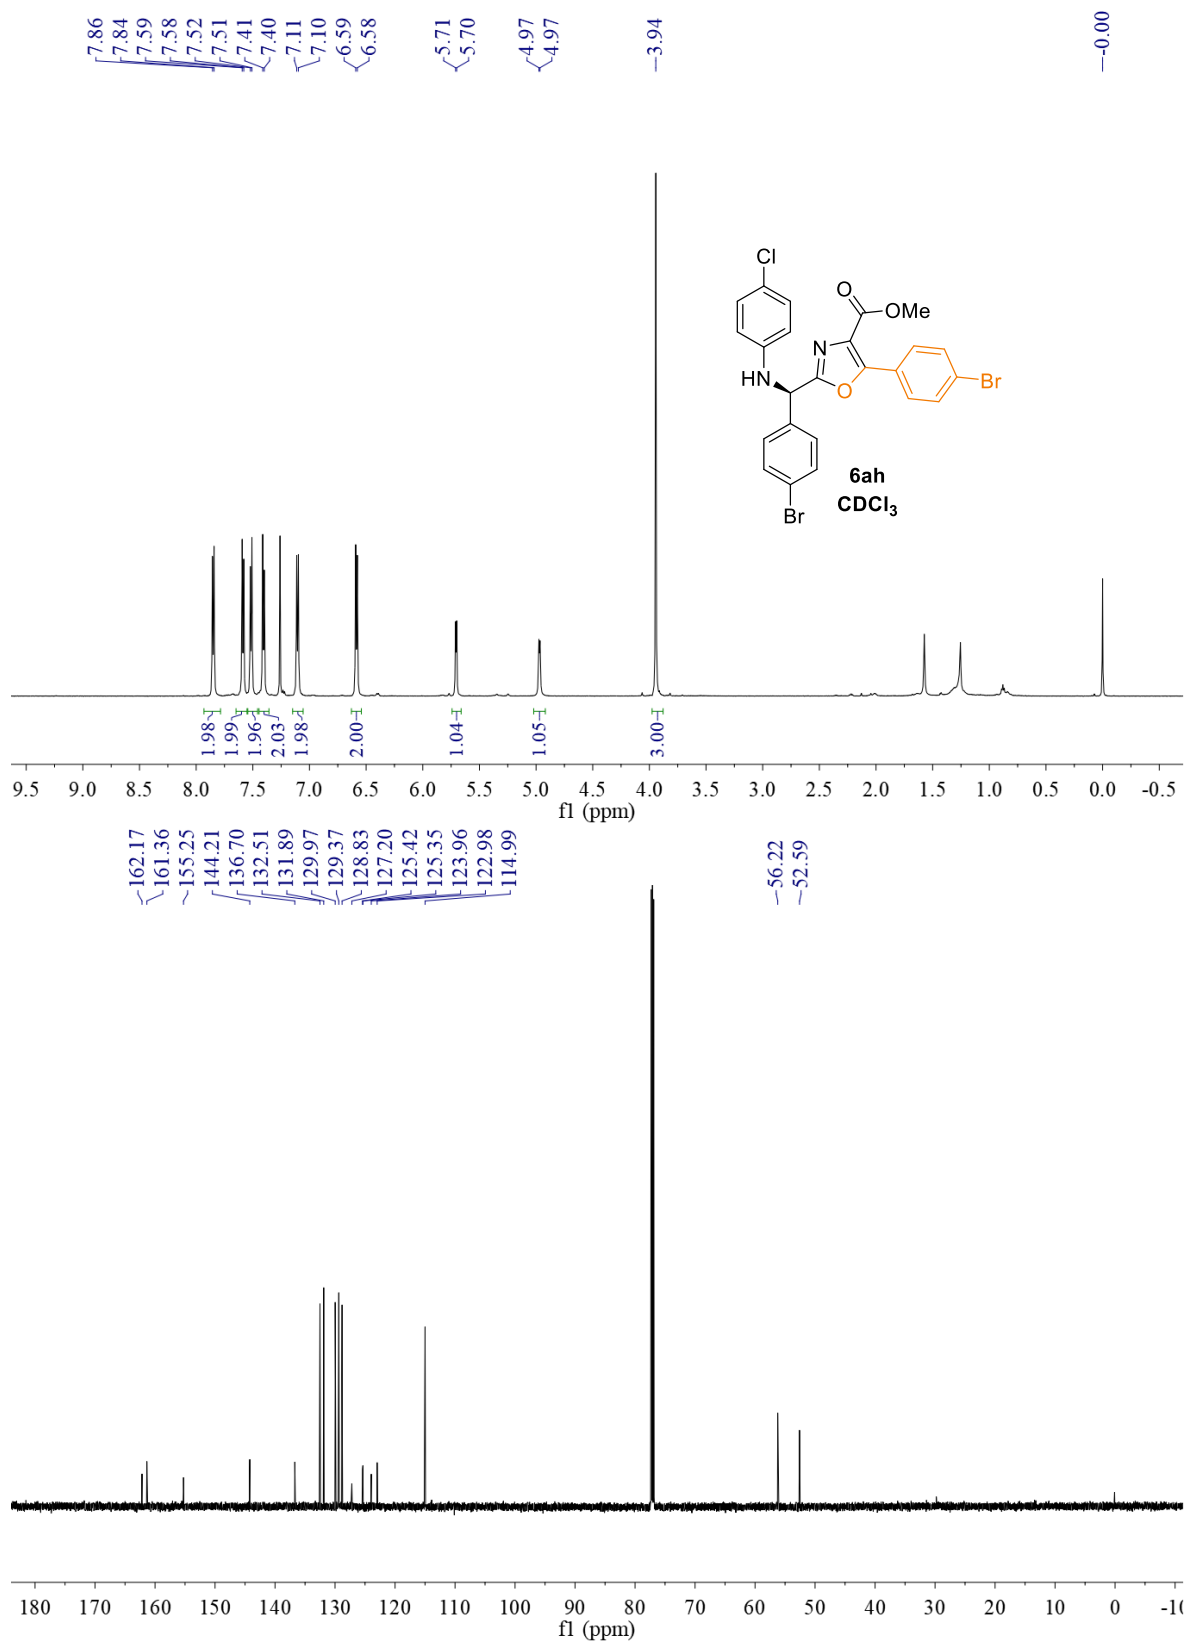

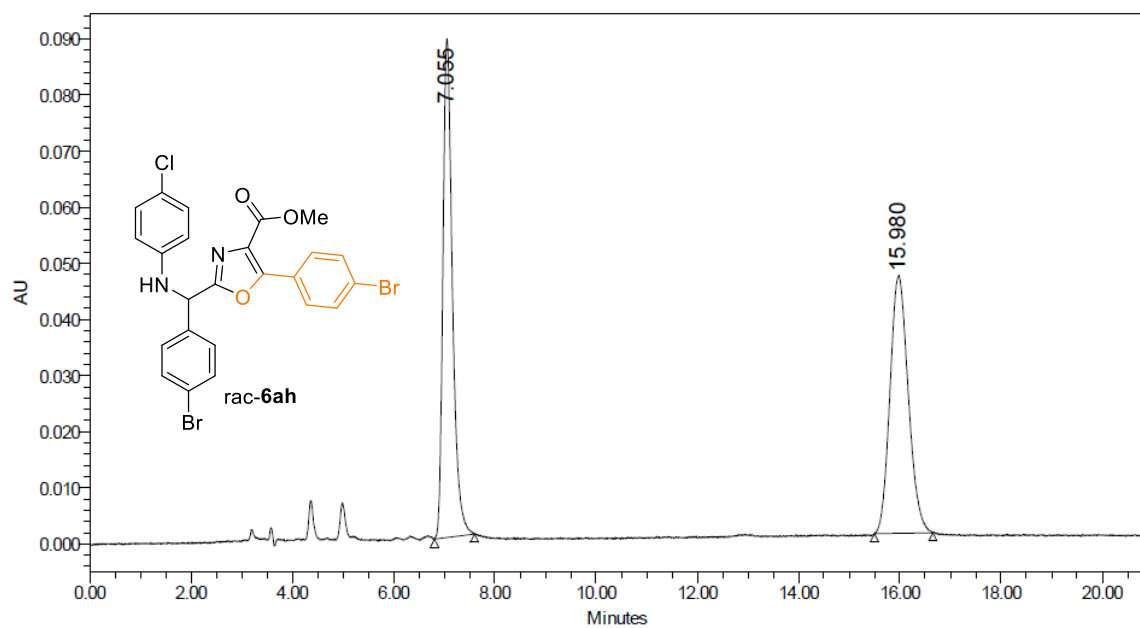

|   | RT<br>(min) | Peak<br>Type | Area<br>(μV*sec) | % Area | Height<br>(μV) | % Height | Integration<br>Type | Points<br>Across Peak | Start<br>Time<br>(min) | End<br>Time<br>(min) |
|---|-------------|--------------|------------------|--------|----------------|----------|---------------------|-----------------------|------------------------|----------------------|
| 1 | 7.055       | Unknown      | 1155061          | 50.07  | 88876          | 65.92    | BB                  | 475                   | 6.810                  | 7.602                |
| 2 | 15.980      | Unknown      | 1151972          | 49.93  | 45941          | 34.08    | BB                  | 693                   | 15.500                 | 16.655               |

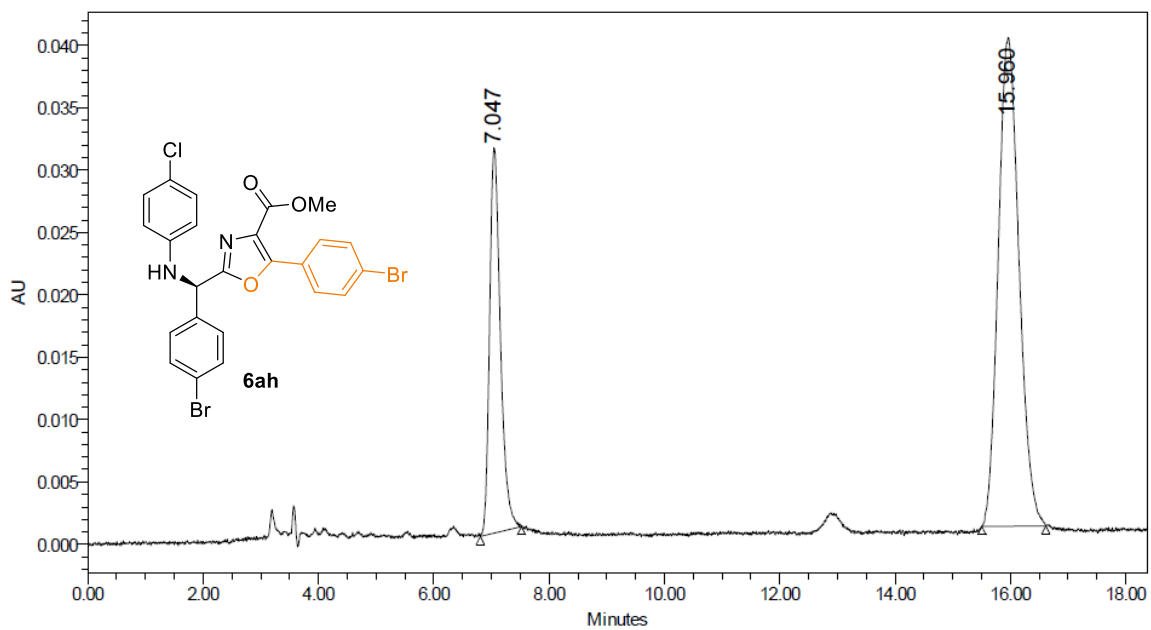

|   | RT<br>(min) | Peak<br>Type | Area<br>(μV*sec) | % Area | Height<br>(μV) | % Height | Integration<br>Type | Points<br>Across Peak | Start<br>Time<br>(min) | End<br>Time<br>(min) |
|---|-------------|--------------|------------------|--------|----------------|----------|---------------------|-----------------------|------------------------|----------------------|
| 1 | 7.047       | Unknown      | 401380           | 29.05  | 30870          | 44.06    | BB                  | 427                   | 6.808                  | 7.520                |
| 2 | 15.960      | Unknown      | 980273           | 70.95  | 39192          | 55.94    | BB                  | 665                   | 15.505                 | 16.613               |



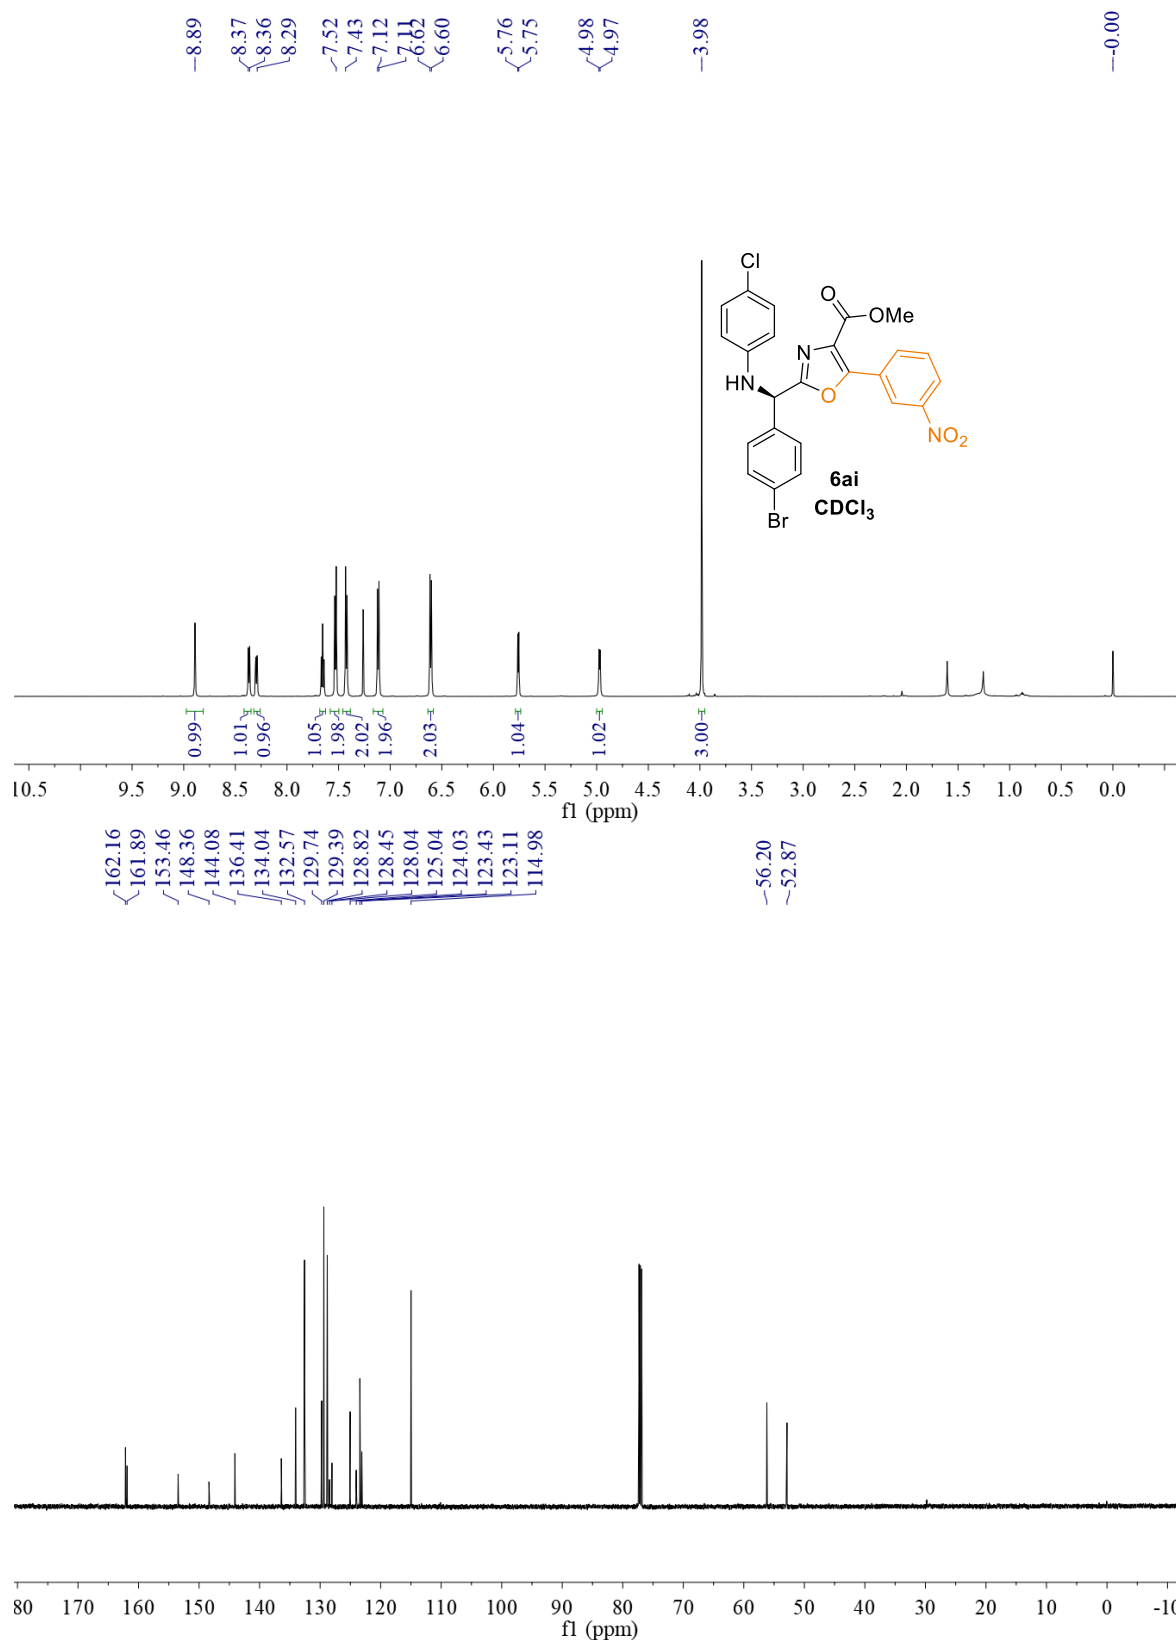

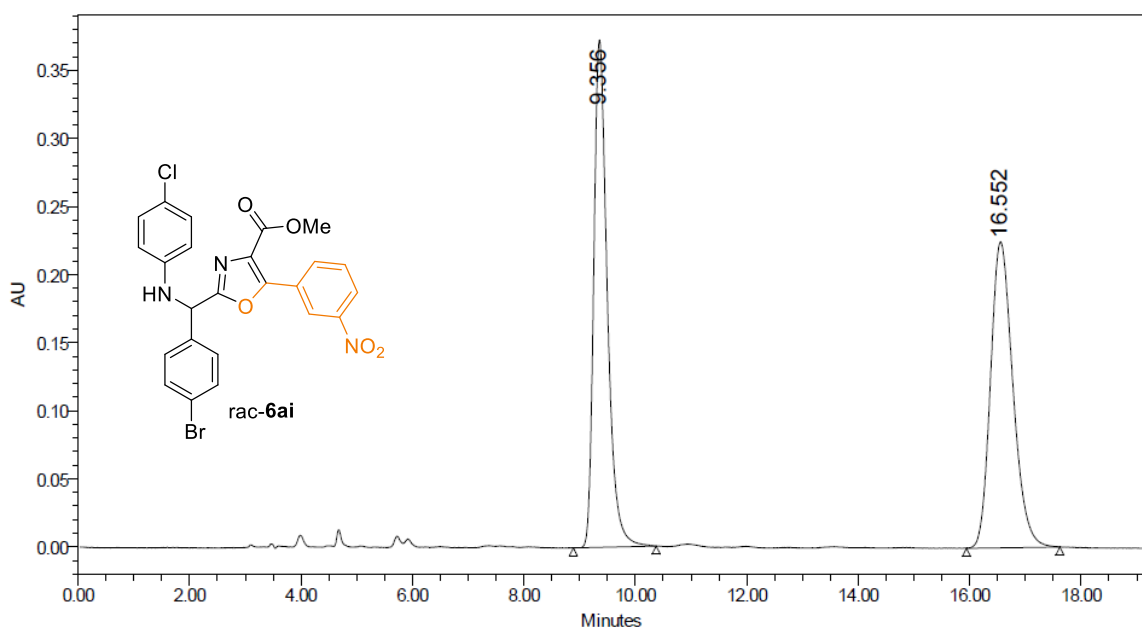

|   | RT<br>(min) | Peak<br>Type | Area<br>(μV*sec) | % Area | Height<br>(μV) | % Height | Integration<br>Type | Points<br>Across Peak | Start<br>Time<br>(min) | End<br>Time<br>(min) |
|---|-------------|--------------|------------------|--------|----------------|----------|---------------------|-----------------------|------------------------|----------------------|
| 1 | 9.356       | Unknown      | 6255941          | 49.93  | 372688         | 62.37    | BB                  | 891                   | 8.888                  | 10.373               |
| 2 | 16.552      | Unknown      | 6274082          | 50.07  | 224816         | 37.63    | BB                  | 1004                  | 15.945                 | 17.618               |

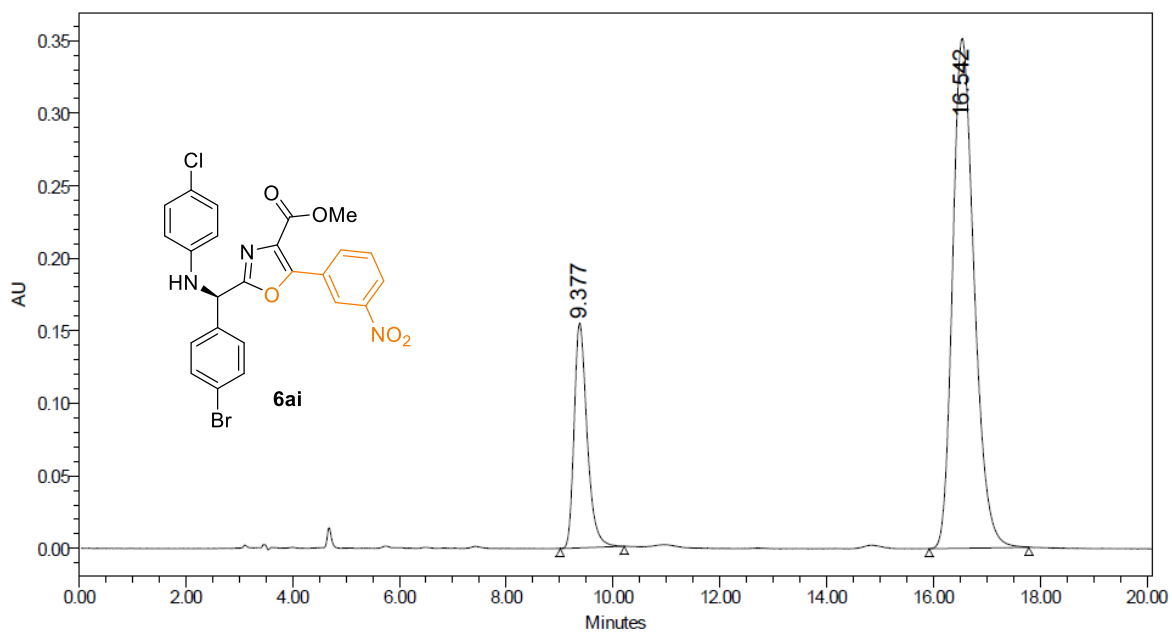

|   | RT<br>(min) | Peak<br>Type | Area<br>(μV*sec) | % Area | Height<br>(μV) | % Height | Integration<br>Type | Points<br>Across Peak | Start<br>Time<br>(min) | End<br>Time<br>(min) |
|---|-------------|--------------|------------------|--------|----------------|----------|---------------------|-----------------------|------------------------|----------------------|
| 1 | 9.377       | Unknown      | 2618267          | 20.99  | 154828         | 30.57    | BB                  | 720                   | 9.010                  | 10.210               |
| 2 | 16.542      | Unknown      | 9857913          | 79.01  | 351614         | 69.43    | BB                  | 1120                  | 15.923                 | 17.790               |

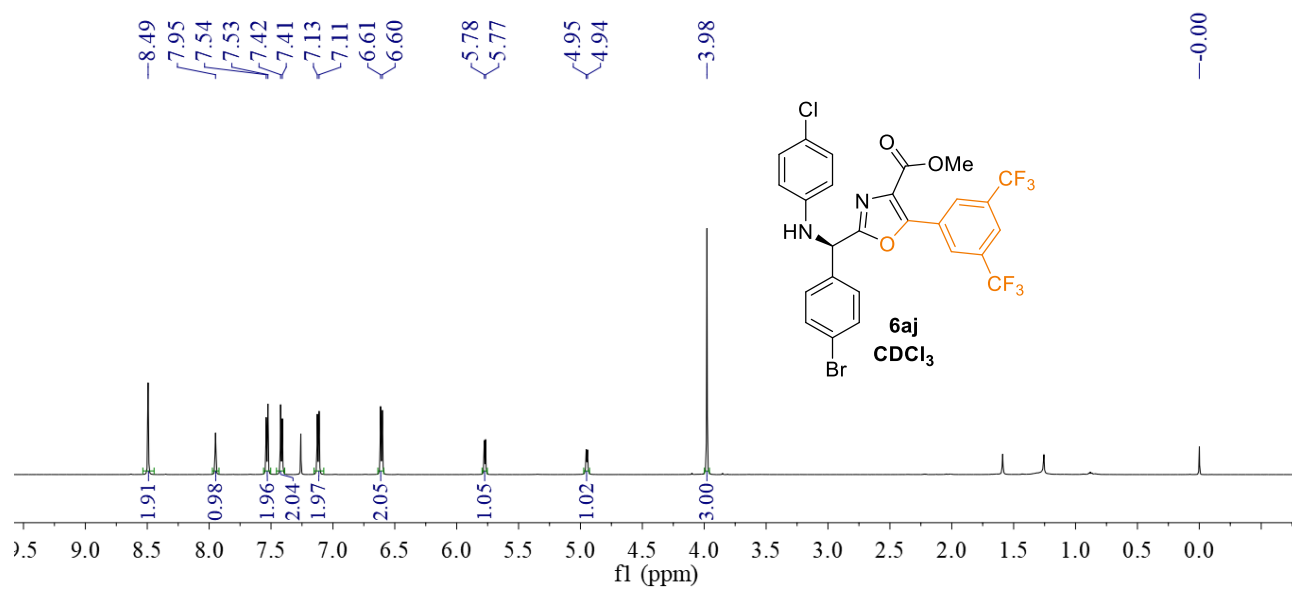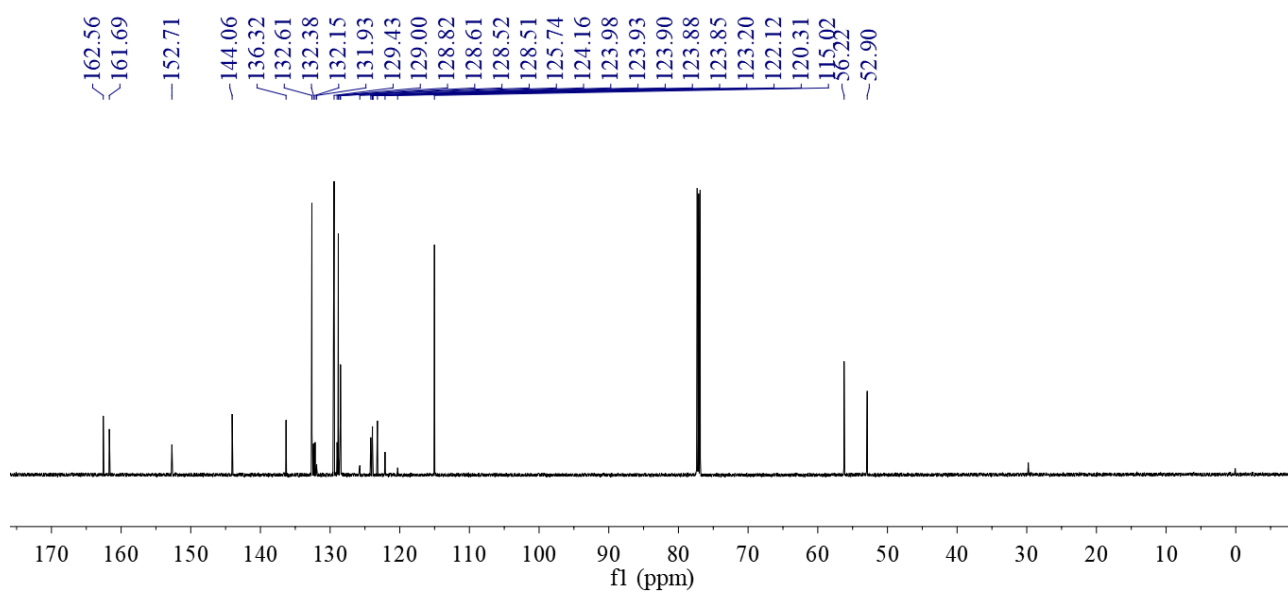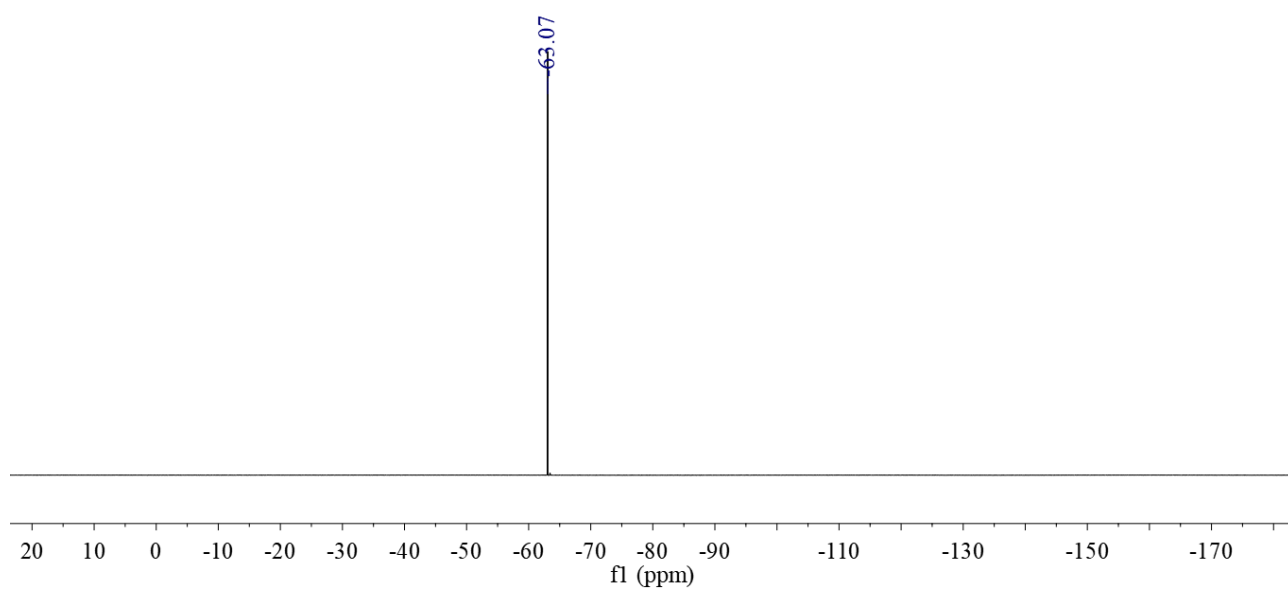

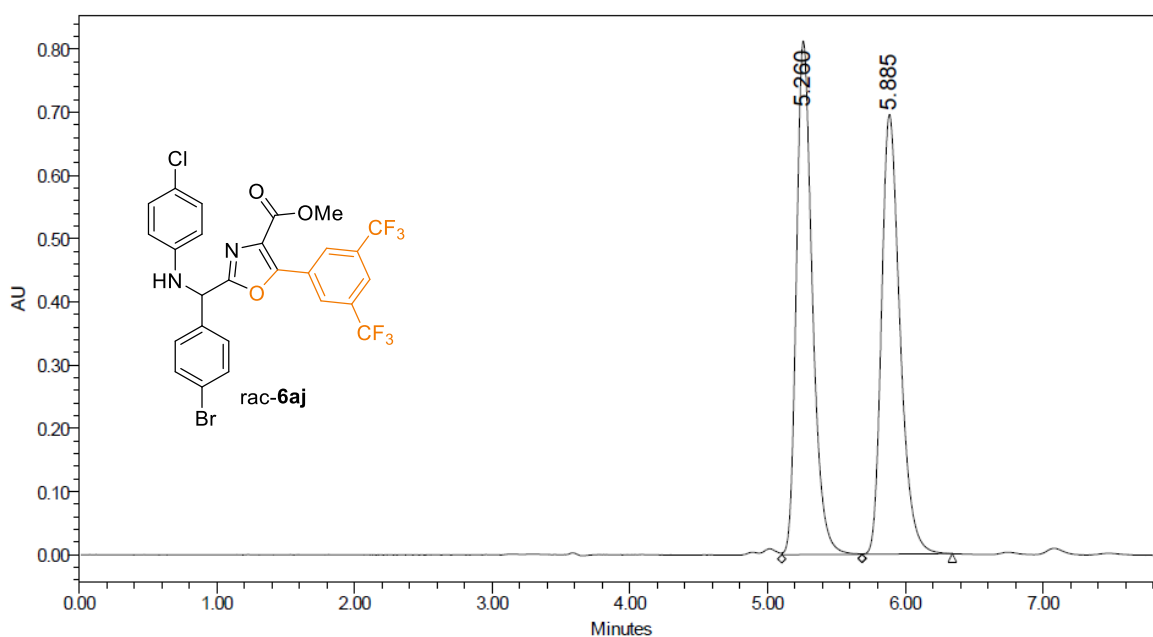

|   | RT<br>(min) | Peak<br>Type | Area<br>( $\mu\text{V}\cdot\text{sec}$ ) | % Area | Height<br>( $\mu\text{V}$ ) | % Height | Integration<br>Type | Points<br>Across Peak | Start<br>Time<br>(min) | End<br>Time<br>(min) |
|---|-------------|--------------|------------------------------------------|--------|-----------------------------|----------|---------------------|-----------------------|------------------------|----------------------|
| 1 | 5.260       | Unknown      | 6531271                                  | 50.21  | 812230                      | 53.88    | VV                  | 350                   | 5.103                  | 5.687                |
| 2 | 5.885       | Unknown      | 6477819                                  | 49.79  | 695287                      | 46.12    | VB                  | 393                   | 5.687                  | 6.342                |

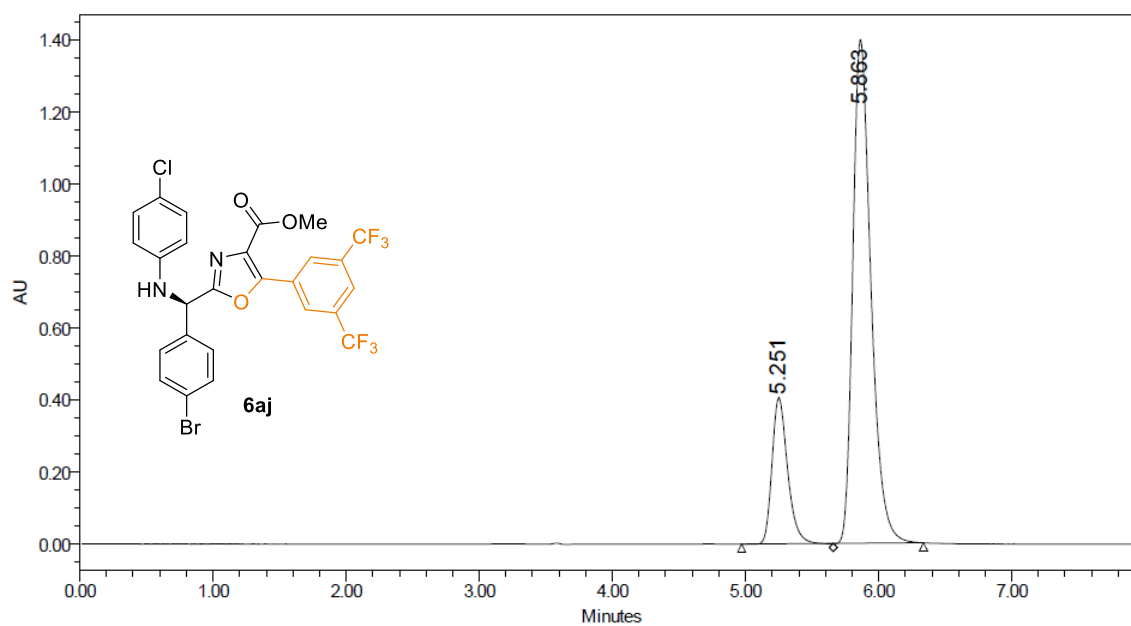

|   | RT<br>(min) | Peak<br>Type | Area<br>( $\mu\text{V}\cdot\text{sec}$ ) | % Area | Height<br>( $\mu\text{V}$ ) | % Height | Integration<br>Type | Points<br>Across Peak | Start<br>Time<br>(min) | End<br>Time<br>(min) |
|---|-------------|--------------|------------------------------------------|--------|-----------------------------|----------|---------------------|-----------------------|------------------------|----------------------|
| 1 | 5.251       | Unknown      | 3293738                                  | 19.94  | 405530                      | 22.47    | bV                  | 412                   | 4.972                  | 5.658                |
| 2 | 5.863       | Unknown      | 13228646                                 | 80.06  | 1399026                     | 77.53    | Vb                  | 407                   | 5.658                  | 6.337                |

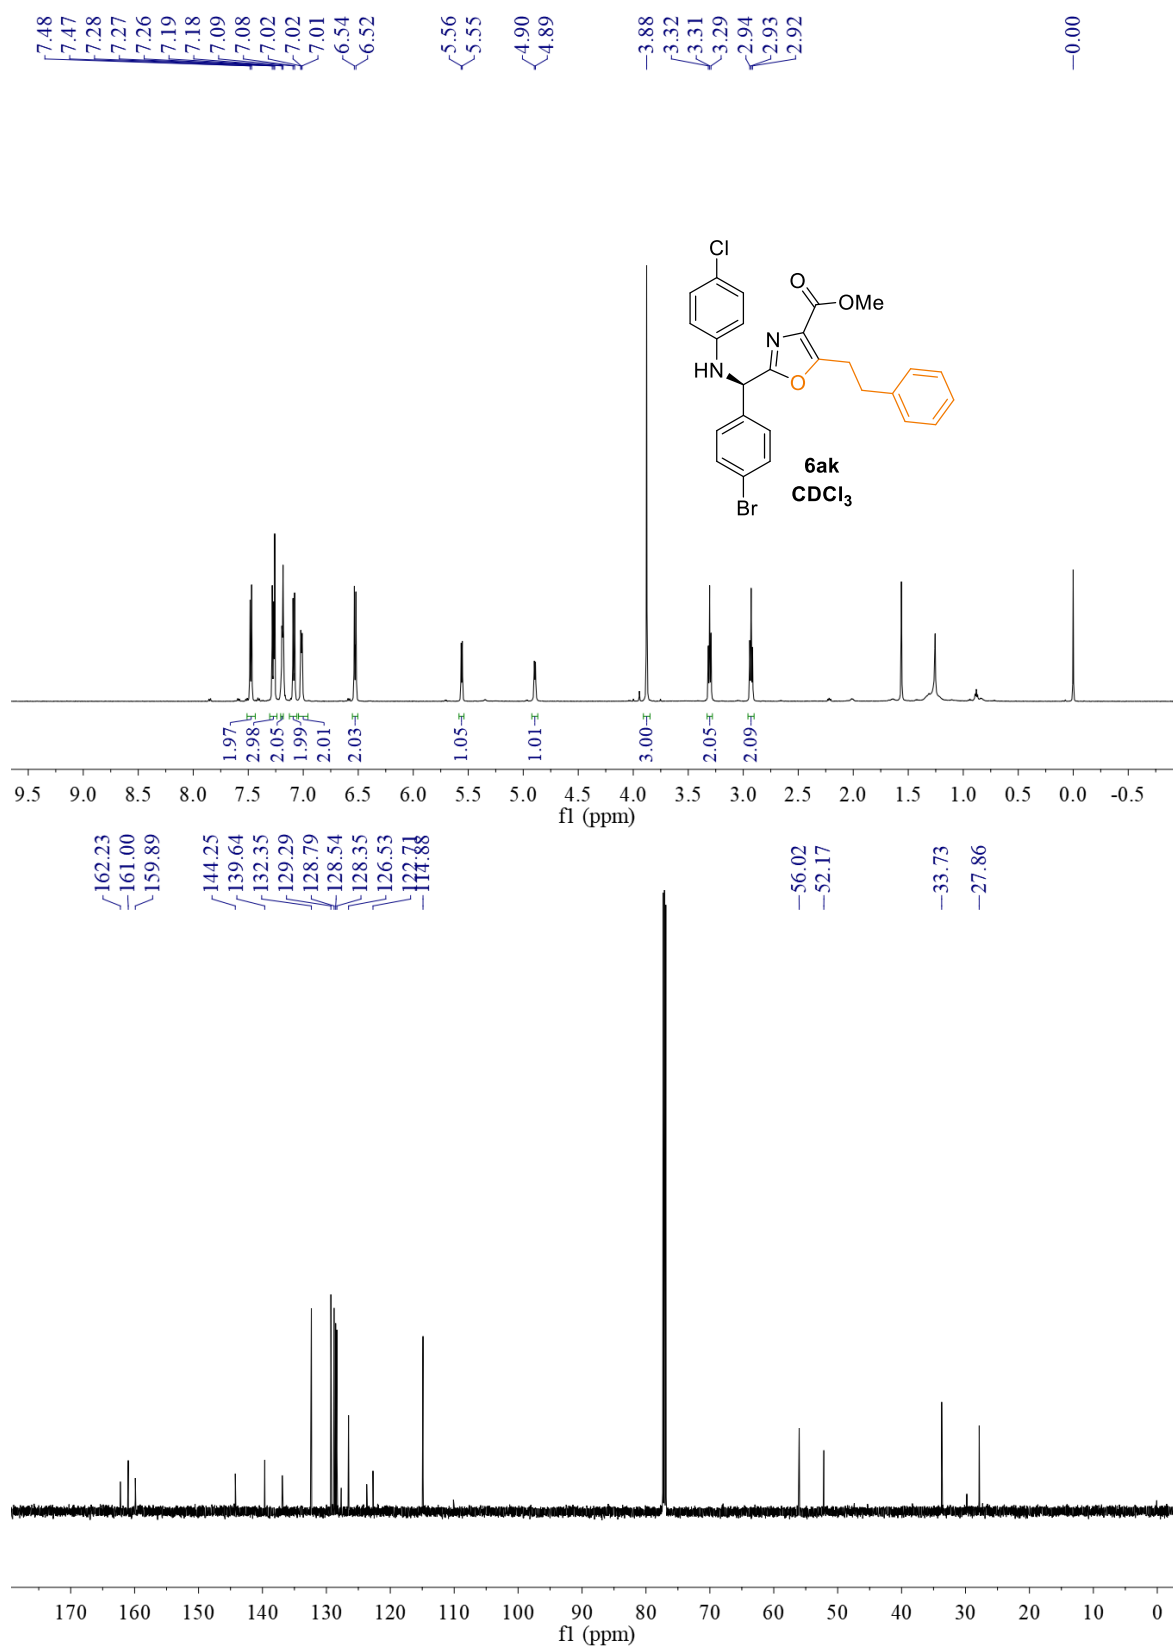

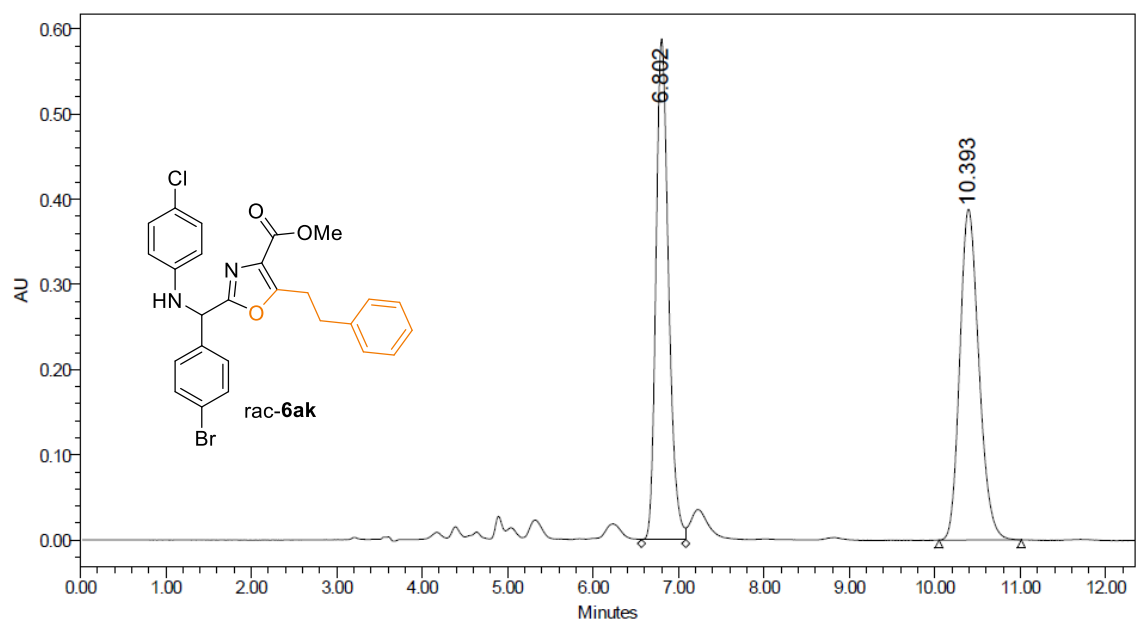

|   | RT (min) | Peak Type | Area ( $\mu\text{V}\cdot\text{sec}$ ) | % Area | Height ( $\mu\text{V}$ ) | % Height | Integration Type | Points Across Peak | Start Time (min) | End Time (min) |
|---|----------|-----------|---------------------------------------|--------|--------------------------|----------|------------------|--------------------|------------------|----------------|
| 1 | 6.802    | Unknown   | 6006064                               | 49.84  | 587565                   | 60.21    | VV               | 311                | 6.567            | 7.085          |
| 2 | 10.393   | Unknown   | 6044836                               | 50.16  | 388232                   | 39.79    | BB               | 578                | 10.048           | 11.012         |

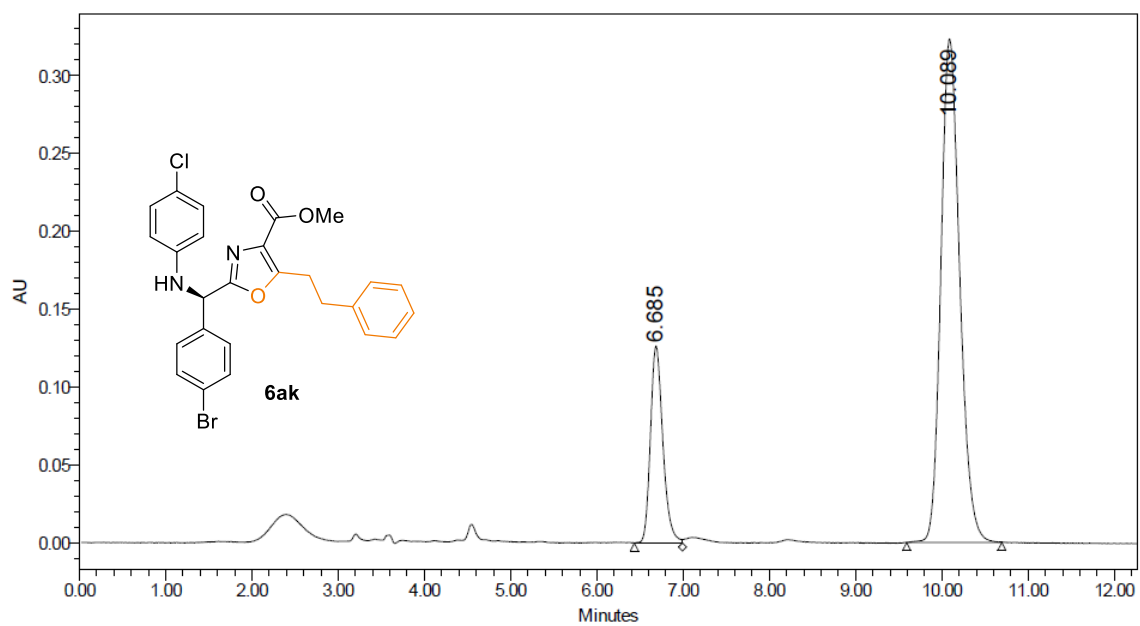

|   | RT (min) | Peak Type | Area ( $\mu\text{V}\cdot\text{sec}$ ) | % Area | Height ( $\mu\text{V}$ ) | % Height | Integration Type | Points Across Peak | Start Time (min) | End Time (min) |
|---|----------|-----------|---------------------------------------|--------|--------------------------|----------|------------------|--------------------|------------------|----------------|
| 1 | 6.685    | Unknown   | 1264745                               | 20.46  | 126440                   | 28.11    | BV               | 335                | 6.435            | 6.993          |
| 2 | 10.089   | Unknown   | 4917443                               | 79.54  | 323293                   | 71.89    | BB               | 663                | 9.592            | 10.697         |
